# Supplementary material for: Proteomics of Porphyromonas gingivalis within a model oral microbial community
Source: PubMed Central journal article supplement (PMC2689231; doi:10.1186/1471-2180-9-98), 2009-05-19
Supplement: 1471-2180-9-98-S1.pdf [file 1471-2180-9-98-S1.pdf]

## **Additional Material for M. Kuboniwa *et al.***

### Contents:

|                                                                                       |      |
|---------------------------------------------------------------------------------------|------|
| Instructions for accessing <i>DTASelect</i> filter files.....                         | S-2  |
| Notes and explanatory material for the data tables.....                               | S-2  |
| A note regarding sampling depth and missing data .....                                | S-5  |
| Notes and explanatory material for the additional figures .....                       | S-6  |
| Table ST1 ..... PgSgFn/Pg, cellular proteins.....                                     | S-7  |
| Table ST2 ..... secreted proteins.....                                                | S-56 |
| Reconstructed array plots in ATCC 33277 ORF order,<br>Additional figures SF1-SF4..... | S-62 |
| Frequency Histograms, additional figures SF5, SF6 .....                               | S-66 |

## Instructions for accessing *DTASelect* filter files

The summary data tables that support this paper can be found in the present document. In addition to what is contained here, for those interested in SEQUEST scores and other analytical detail for individual peptides grouped by *P. gingivalis* ORF number, the *DTASelect* Ver. 1.9 filter files that contain this information in plain text format are posted at the URL below. This information will be primarily of interest to specialists in proteomics with the background to interpret the scores and filter parameters. In contrast, the summary data tables in this file are intended primarily for the oral biology and wider microbiology communities and thus only list information of interest to those groups. Microbiologists with specific questions regarding the interpretation of any particular portion of the proteomics data or data quality issues should contact Murray Hackett at [mhackett@u.washington.edu](mailto:mhackett@u.washington.edu).

<http://depts.washington.edu/mhlab/>

login name: guest

password: PGSGFNDA

Please note that the password is case sensitive. No established public proteomic data archive at the time of submission was able to easily accommodate the scale of the raw mass spectrometry data acquired for this study, and the University of Washington does not at this time allow use of the TRANCHE system with university owned equipment. We hope this situation will be corrected in the future. Thus, the raw mass spectral data will be maintained on the corresponding author's server until such time as the mechanics of long-term archival storage can be arranged.

## Notes for all tables

The W83 ORF numbers (PG numbers) and functional descriptors are primarily those derived from the work of K. E. Nelson *et al.* (2003) *J. Bacteriol.*, **185**:5591-5601 with some changes and corrections. The specific release of the annotation that served as the basis of our *P. gingivalis* ORF database is Ver. 3.1. For the latest information on the *P. gingivalis* genome sequence for W83, see <http://cmr.jcvi.org/cgi-bin/CMR/GenomePage.cgi?org=gpg>. For the PGN numbers derived from the annotation for strain ATCC 33277, see <http://www.cb.k.u-tokyo.ac.jp/hattorilab/en/projects> and M. Naito *et al.* (2008) *DNA Res.* **15**: 215-225. Table ST1 contains summary proteome information for the comparison of *P. gingivalis* incubated in the presence of *S. gordonii* and *F. nucleatum* with a control population of *P. gingivalis* incubated by itself under the same culture conditions as described in the main text. Table ST2 consists of qualitative protein detection information for secreted proteins observed under the same two conditions, with information about raw spectral counts and raw summed intensities, but no attempt has been made to draw quantitative conclusions for the secreted proteins, as

we did for the cellular proteins in Table ST1. The secreted protein preparations were reproducible in a qualitative sense, but not quantitatively. The isolation procedure for the secreted proteins described in the main text also extracted some surface bound proteins and cellular proteins as well.

## Notes for Supplemental Table ST1

### Protein Spectral Count fields

***q*-value:** this is a measure of false discovery rate that is discussed in the main text. In this study any *q*-value less than 0.01 was judged to be significant. Similarly to a *p*-value, the *q*-value is influenced by both the magnitude of the abundance change and the variance, but it is a measure of significance in terms of false discovery rate rather than false positive rate. It implicitly contains a correction for multiple hypothesis testing. See Storey and Tibshirani (2003) *PNAS* 100, 9440-9445 for a complete description of the *q*-value. As described in the main text, the spectral count *q*-value was derived from the uncorrected *p*-value associated with a *G*-test as described for proteomics data in Xia *et al.* (2007) *Inter. Jour. Mass Spectrom.* 259, 105-116. The actual value of *G* used for this work (see Tables ST1-ST3) was calculated globally as  $G_{Total}$  according to the method described in Sokal and Rohlf, *Biometry*, 3<sup>rd</sup> Ed. (1995), which takes advantage of the additivity of *G* for each individual comparison, e.g.  $G_{Total} = G(PgSgFn I, Pg I) + G(PgSgFn I, Pg II) + G(PgSgFn II, Pg I) + G(PgSgFn II, Pg II)$  with 2 to 4 degrees of freedom, depending on missing values for certain ORFs.

Each individual value of *G* was calculated as given below, using the *PgSgFn / Pg* comparison as an example:

$$G = 2 \left[ f_{PgSgFn} \cdot \ln \left( \frac{f_{PgSgFn}}{f_{PgSgFn} + f_{Pg}} \right) + f_{Pg} \cdot \ln \left( \frac{f_{Pg}}{f_{PgSgFn} + f_{Pg}} \right) \right]$$

Where the expectation value, shown above as  $\frac{f_{PgSgFn} + f_{Pg}}{2}$ , of equal spectral counts for *PgSgFn* and *Pg* assumes a null hypothesis of zero abundance change between them using normalized data in which the total spectral counts have been made equal for each variable. The value of  $G_{Total}$  was then compared using R to the value of Chi-square at the appropriate degrees of freedom to derive the *p*-value, which, in turn, served as the input into the QVALUE R package. The correction for multiple hypothesis testing contained in the *q*-value is significantly less conservative in practice than other, more common, corrections to the *p*-value.

**Pg:** the average linear sum over both biological replicates of normalized spectral counts associated with a particular ORF for *P. gingivalis* incubated by itself.

**PgSgFn:** the average linear sum over both biological replicates of normalized spectral counts associated with a particular ORF for *P. gingivalis* incubated with *S. Gordonii* and *F. nucleatum*.

**log<sub>2</sub> Ratio:** this is the global log<sub>2</sub> ratio of the average of the normalized total spectral count values, e.g.  $\log_2 [(PgSgFn I + PgSgFn II) \div (Pg I + Pg II)]$ .

**log<sub>2</sub> Sum:** the sum of the normalized global spectral counts for both conditions being compared. This number is primarily useful for estimating the degree to which a particular ORF is represented in the dataset. The reader is cautioned against making any assumptions that these numbers can be easily related to an absolute quantity of protein.

### **Regulation (abundance change fields for spectral counts and intensity)**

The proteomic relative abundance color codes are **green**, an abundance ratio significantly less than zero on a log<sub>2</sub> scale at a *q*-value cut-off of 0.01; **red**, an abundance ratio significantly greater than zero on a log<sub>2</sub> scale at a *q*-value cut-off of 0.01; **yellow**, detected qualitatively but lacking statistical support for abundance change; **black**, no data for this ORF, a qualitative non-detect. The left hand dot codes the trend as determined using spectral counting. The right hand dot codes the trend as determined by summed signal intensity.

### **Summed Protein Intensity fields**

***q*-value:** See the note for *q*-value given above. As described in the main text, the summed intensity *q*-value was derived from the uncorrected *p*-value associated with a paired *t*-test for the global score over *n* = 4 summed signal intensity comparisons. This was calculated according to the paired comparison method described in Sokal and Rohlf (1995), pages 352-356. The equation for global *t* is given below (*n* = 4), where *sd* is standard deviation, using the PgSgFn/Pg comparison as an example:

$$t = \frac{\{(PgSgFnI - PgI) + (PgSgFnI - PgII) + (PgSgFnII - PgI) + (PgSgFnII - PgII)\} / n}{sd / \sqrt{n}}$$

The value of  $t$  was calculated in R to derive the  $p$ -value, which in turn served as the input into the QVALUE R package as described in the experimental section of the main text.

**log<sub>2</sub> Ratio:** this is the global log<sub>2</sub> ratio of the average of the normalized total summed intensity values for *P. gingivalis* proteins under the two incubation conditions being compared.

**Pg:** the average linear sum over both biological replicates of normalized summed signal intensity for all unique peptides associated with a particular ORF for *P. gingivalis* incubated by itself.

**PgSgFn:** the average linear sum over both biological replicates of normalized summed signal intensity for all unique peptides associated with a particular ORF for *P. gingivalis* incubated with *S. Gordonii* and *F. nucleatum*.

## A note regarding sampling depth and missing data

By sampling depth we refer to the degree that all possible peptides for all possible proteins are measured as mass spectral data that yields an interpretable result in terms of protein identification at frequencies which are representative of relative abundance and also reproducible. This is not an achievable goal with present technology in any absolute sense, but the better the sampling, the more useful and quantitative the dataset. Using the methods of this paper, the higher the number of redundant identifications (spectral counts for unique peptides that only map to one ORF), the more reliable the abundance ratios are likely to be. The work reported here was problematic for us in that the depth of sampling was such that we could not always report abundance changes as significant in the presence of  $q$ -values  $\leq 0.01$ , due to missing data in either the numerator or denominator. In order avoid a divide by zero condition, our software substitutes a reasonable baseline value of spectral counts or intensity, based on data where we had ample objective evidence to support a depth of sampling that was good enough to assume that the absence of data in one channel was a reflection of biological reality rather than sampling error. Such assumptions were not valid for this particular study.

Assumptions regarding sampling depth can be evaluated by several methods, but two that we find especially useful are a frequency histogram of the entire set of log<sub>2</sub> transformed abundance ratios collected for a given comparison and pseudo M versus A plots of the same ratios versus total spectral counts. Such histograms will often show satellite distributions that can indicate an inappropriate use of artificial baselines (see Figure SF5), normalization problems, or both. Inadequate sampling will lead to an irregular appearance of the histogram. In general such data appears as log-normally distributed with few irregularities when things have been done properly, even in cases where many proteins are changing (see Figure SF6 for a typical example). The choice of bin size can

also impact interpretation dramatically, and smaller bin sizes tend to be more informative. The pseudo M versus A plot can communicate much of the same information, but also shows the sampling depth relationship more explicitly on the x-axis (Fig. 2 in the main text). The combined effects of sequence overlaps among the different organisms and data acquisition speed limitations with the LTQ mass spectrometer were such that not as many unique peptides were observed for *P. gingivalis* in the presence of the other microbes as for *P. gingivalis* by itself or in the presence of human or bovine proteins. This all makes perfect sense given the large number of slightly overlapping inferred protein sequences shared among *P. gingivalis*, *S. gordonii* and *F. nucleatum*, and the minimal sequence overlap of *P. gingivalis* proteins with those of bovine or human origin. Because the quantitation is strongly influenced by the number of unique peptides recovered, the relative abundance calculations contained somewhat more scatter than what is normally observed with our single microbe studies. For the work reported here, we only retained abundance ratios for proteins with parent ion MS<sup>1</sup> data confirmed by high scoring linked MS<sup>2</sup> product ion data in both channels, regardless of *q*-value. In other words, a number of proteins initially called significant, based on assumptions encoded in software for *P. gingivalis* alone, were edited out by hand based on sampling assumptions more appropriate for *P. gingivalis* incubated with these other organisms.

#### **Notes for additional figures SF1-SF6**

Figures SF1-SF4 have been referred to in our past work as a reconstructed array images and represent a computer generated global overview of the *P. gingivalis* proteome. Four such overviews are given. Each image follows the same PGN ORF order and color coding for detected proteins as the Summary Data Table ST1, ascending PGN numbers (Ver. 1.0 of the ATTC 33277 annotation) from left to right, top to bottom. Figures SF1-SF2 contain quantitative summaries for the cellular data. Figures SF3-SF4 contain qualitative information regarding protein identification for secreted proteins, which are coded as orange for qualitative detection only. In all genome view plots gray indicates a non-detect. Black indicates an ORF number that is not used according to Ver. 3.1 of the W83 annotation, the basis for the original database used to search the raw data. If the gene was not assigned for W83, no PGN number would show up in this analysis. Thus a number of ORF assignments that are unique to either the Japanese or LANL annotation of the ATCC 33277 genome sequence do not show up on these plots. Figure SF5 is a frequency histogram that illustrates the effect of improper use of artificial baselines with data of inadequate sampling depth. Figure SF6 illustrates the appearance of the same data after abundance ratios with artificial baselines in one channel have been removed. Figure SF6 is representative of the quantitative data reported in Table ST1, in that all inappropriately baselined data have been coded yellow for “no abundance change”.

| TIGR    | PgSgFn / Pg Spectral Count                                      |         |        |       |                        |                      | PgSgFn / Pg Protein Intensity |  |   |          |                        |            |            |
|---------|-----------------------------------------------------------------|---------|--------|-------|------------------------|----------------------|-------------------------------|--|---|----------|------------------------|------------|------------|
|         | PGN                                                             | q-value | PgSgFn | Pg    | log <sub>2</sub> Ratio | log <sub>2</sub> Sum | Regulation                    |  |   | q-value  | log <sub>2</sub> Ratio | PgSgFn     | Pg         |
| PG0002  | 0.604563                                                        | 2.13    | 4      | -0.91 | 2.62                   | Y                    |                               |  | Y | 0.052108 | -2.10                  | 66413      | 1523645.5  |
| PGN0002 | <i>hexapeptide transferase family protein</i>                   |         |        |       |                        |                      |                               |  |   |          |                        |            |            |
| PG0004  | 0.779998                                                        | 17.06   | 17.5   | -0.04 | 5.11                   | Y                    |                               |  | Y | 0.163917 | -0.03                  | 9614415    | 10074922.7 |
| PGN0004 | <i>transcriptional regulator Sir2 family</i>                    |         |        |       |                        |                      |                               |  |   |          |                        |            |            |
| PG0005  | 0.507925                                                        | 6.4     | 10     | -0.64 | 4.04                   | Y                    |                               |  | Y | 0.085610 | -2.64                  | 1755618.5  | 3030023.63 |
| PGN0005 | <i>conserved hypothetical protein</i>                           |         |        |       |                        |                      |                               |  |   |          |                        |            |            |
| PG0010  | 0.786190                                                        | 21.32   | 22     | -0.05 | 5.44                   | Y                    |                               |  | G | 0.007211 | -0.85                  | 4816840.5  | 8756436.3  |
| PGN0008 | <i>clpC ATP-dependent Clp protease ATP-binding subunit ClpC</i> |         |        |       |                        |                      |                               |  |   |          |                        |            |            |
| PG0011  | 0.000488                                                        | 36.25   | 68.5   | -0.92 | 6.71                   | G                    |                               |  | Y | 0.025232 | -0.57                  | 21893500.5 | 31429682.3 |
| PGN0009 | <i>glycosyl hydrolase family 3</i>                              |         |        |       |                        |                      |                               |  |   |          |                        |            |            |
| PG0012  | 0.061349                                                        | 127.94  | 165    | -0.37 | 8.19                   | Y                    |                               |  | G | 0.002890 | -0.50                  | 96560252.5 | 136059483  |
| PGN0010 | <i>L-threonine-O-3-phosphate decarboxylase putative</i>         |         |        |       |                        |                      |                               |  |   |          |                        |            |            |
| PG0016  | 0.543202                                                        | 2.13    | 9      | -2.08 | 3.48                   | Y                    |                               |  | Y | 0.011171 | -5.67                  | 66413      | 3656980.23 |
| PGN0012 | <i>sigma-54 dependent DNA-binding response regulator</i>        |         |        |       |                        |                      |                               |  |   |          |                        |            |            |
| PG0017  | 0.751373                                                        | 2.13    | 3      | -0.49 | 2.36                   | Y                    |                               |  | Y | 0.052108 | -2.11                  | 66413      | 2026410.5  |
| PGN0013 | <i>sensor histidine kinase</i>                                  |         |        |       |                        |                      |                               |  |   |          |                        |            |            |
| PG0020  | 0.751373                                                        | 2.13    | 7      | -1.72 | 3.19                   | Y                    |                               |  | Y | 0.017556 | -4.10                  | 66413      | 1292664.75 |
| PGN0015 | <i>transcriptional regulator MarR family</i>                    |         |        |       |                        |                      |                               |  |   |          |                        |            |            |
| PG0021  | 0.779998                                                        | 2.13    | 6      | -1.49 | 3.02                   | Y                    |                               |  | G | 0.001540 | -4.65                  | 66413      | 1659629.85 |
| PGN0016 | <i>TIM-barrel protein putative NifR3 family</i>                 |         |        |       |                        |                      |                               |  |   |          |                        |            |            |
| PG0022  | 0.000000                                                        | 17.06   | 59.5   | -1.8  | 6.26                   | G                    |                               |  | Y | 0.155528 | 0.19                   | 13050763   | 11905689.8 |
| PGN0017 | <i>sulfate permease family protein</i>                          |         |        |       |                        |                      |                               |  |   |          |                        |            |            |
| PG0024  | 0.773021                                                        | 2.13    | 6.5    | -1.61 | 3.11                   | Y                    |                               |  | G | 0.009001 | -5.81                  | 66413      | 3935942.93 |
| PGN0020 | <i>DNA-binding protein putative</i>                             |         |        |       |                        |                      |                               |  |   |          |                        |            |            |
| PG0025  | 0.608518                                                        | 8.53    | 10     | -0.23 | 4.21                   | Y                    |                               |  | Y | 0.115558 | -1.57                  | 3975359.5  | 2361695.45 |
| PGN0021 | <i>fumarylacetoacetate hydrolase family protein</i>             |         |        |       |                        |                      |                               |  |   |          |                        |            |            |
| PG0026  | 0.715494                                                        | 43.71   | 38     | 0.2   | 6.35                   | Y                    |                               |  | G | 0.000803 | -0.26                  | 17740142.5 | 21214334.2 |
| PGN0022 | <i>hypothetical protein PG_0026</i>                             |         |        |       |                        |                      |                               |  |   |          |                        |            |            |
| PG0027  | 0.004096                                                        | 242.02  | 298.5  | -0.3  | 9.08                   | G                    |                               |  | Y | 0.020525 | -0.61                  | 150443576  | 221609242  |
| PGN0023 | <i>hypothetical protein PG_0027</i>                             |         |        |       |                        |                      |                               |  |   |          |                        |            |            |
| PG0028  | 0.010359                                                        | 2.13    | 16.5   | -2.95 | 4.22                   | Y                    |                               |  | G | 0.004191 | -6.14                  | 66413      | 4746575.48 |
| PGN0024 | <i>ispF 2C-methyl-D-erythritol 24-cyclodiphosphate synthase</i> |         |        |       |                        |                      |                               |  |   |          |                        |            |            |
| PG0030  | 0.024940                                                        | 9.6     | 20.5   | -1.09 | 4.91                   | Y                    |                               |  | Y | 0.014416 | -4.25                  | 3884213.5  | 12709376   |
| PGN0026 | <i>cytidine deaminase</i>                                       |         |        |       |                        |                      |                               |  |   |          |                        |            |            |
| PG0031  | 0.004405                                                        | 20.26   | 42.5   | -1.07 | 5.97                   | G                    |                               |  | G | 0.005972 | -1.83                  | 8773194    | 28743644.4 |
| PGN0029 | <i>hypothetical protein PG_0031</i>                             |         |        |       |                        |                      |                               |  |   |          |                        |            |            |
| PG0032  | 0.004084                                                        | 2.13    | 17.5   | -3.04 | 4.29                   | Y                    |                               |  | G | 0.000595 | -6.50                  | 66413      | 5955795.8  |
| PGN0030 | <i>beta-mannosidase putative</i>                                |         |        |       |                        |                      |                               |  |   |          |                        |            |            |
| PG0033  | 0.779998                                                        | 2.13    | 6      | -1.49 | 3.02                   | Y                    |                               |  | G | 0.001527 | -5.82                  | 66413      | 3756167.5  |
| PGN0031 | <i>RmuC domain protein</i>                                      |         |        |       |                        |                      |                               |  |   |          |                        |            |            |
| PG0034  | 0.720026                                                        | 192.98  | 177.5  | 0.12  | 8.53                   | Y                    |                               |  | Y | 0.052108 | -0.27                  | 207076070  | 249862071  |
| PGN0033 | <i>trx thioredoxin</i>                                          |         |        |       |                        |                      |                               |  |   |          |                        |            |            |
| PG0035  | 0.683204                                                        | 20.26   | 26     | -0.36 | 5.53                   | Y                    |                               |  | Y | 0.032546 | -0.33                  | 7195544    | 8905958.5  |
| PGN0034 | <i>dnaE DNA polymerase III alpha subunit</i>                    |         |        |       |                        |                      |                               |  |   |          |                        |            |            |
| PG0037  | 0.000000                                                        | 115.15  | 51.5   | 1.16  | 7.38                   | R                    |                               |  | R | 0.005870 | 0.60                   | 82127806.5 | 54875124.3 |
| PGN0035 | <i>rplS ribosomal protein L19</i>                               |         |        |       |                        |                      |                               |  |   |          |                        |            |            |
| PG0042  | 0.000000                                                        | 651.44  | 810.5  | -0.32 | 10.51                  | G                    |                               |  | G | 0.003852 | -0.36                  | 857144404  | 1.1001e+09 |
| PGN0038 | <i>glyA serine hydroxymethyltransferase</i>                     |         |        |       |                        |                      |                               |  |   |          |                        |            |            |

| TIGR    | PgSgFn / Pg Spectral Count                                              |         |        |       |                        |                      | PgSgFn / Pg Protein Intensity |         |                        |          |       |            |            |
|---------|-------------------------------------------------------------------------|---------|--------|-------|------------------------|----------------------|-------------------------------|---------|------------------------|----------|-------|------------|------------|
|         | PGN                                                                     | q-value | PgSgFn | Pg    | log <sub>2</sub> Ratio | log <sub>2</sub> Sum | Regulation                    | q-value | log <sub>2</sub> Ratio | PgSgFn   | Pg    |            |            |
| PG0043  | 0.001408                                                                | 77.83   | 116.5  | -0.58 | 7.6                    | G                    |                               |         | Y                      | 0.015889 | -0.50 | 44401008.5 | 62338800.6 |
| PGN0039 | <i>nahA beta-hexosaminidase</i>                                         |         |        |       |                        |                      |                               |         |                        |          |       |            |            |
| PG0045  | 0.786857                                                                | 42.65   | 45     | -0.08 | 6.45                   | Y                    |                               |         | G                      | 0.004652 | -0.33 | 21975084.5 | 27633555.7 |
| PGN0041 | <i>htpG heat shock protein HtpG</i>                                     |         |        |       |                        |                      |                               |         |                        |          |       |            |            |
| PG0047  | 0.784897                                                                | 67.17   | 63     | 0.09  | 7.02                   | Y                    |                               |         | Y                      | 0.053020 | -0.30 | 28225229.5 | 33874089.8 |
| PGN0043 | <i>cell division protein FtsH putative</i>                              |         |        |       |                        |                      |                               |         |                        |          |       |            |            |
| PG0048  | 0.000510                                                                | 47.98   | 22.5   | 1.09  | 6.14                   | R                    |                               |         | Y                      | 0.021356 | 1.60  | 20958090.5 | 6535085.75 |
| PGN0044 | <i>conserved hypothetical protein TIGR00092</i>                         |         |        |       |                        |                      |                               |         |                        |          |       |            |            |
| PG0831  | 0.000077                                                                | 10.66   | 1      | 3.41  | 3.54                   | Y                    |                               |         | Y                      | 0.051674 | 4.61  | 2783681.5  | 23108.5    |
| PGN0072 | <i>hypothetical protein PG_0831</i>                                     |         |        |       |                        |                      |                               |         |                        |          |       |            |            |
| PG2189  | 0.083593                                                                | 10.66   | 10     | 0.09  | 4.37                   | Y                    |                               |         | Y                      | 0.166018 | -2.29 | 11998645.5 | 9981249.88 |
| PGN0096 | <i>lysC aspartate kinase</i>                                            |         |        |       |                        |                      |                               |         |                        |          |       |            |            |
| PG2190  | 0.000252                                                                | 18.13   | 34     | -0.91 | 5.7                    | G                    |                               |         | Y                      | 0.080059 | -3.25 | 5098917    | 8471093.95 |
| PGN0097 | <i>ftsE cell-division ATP-binding protein</i>                           |         |        |       |                        |                      |                               |         |                        |          |       |            |            |
| PG2182  | 0.630045                                                                | 176.99  | 161    | 0.14  | 8.4                    | Y                    |                               |         | Y                      | 0.050907 | -0.34 | 168807234  | 217211175  |
| PGN0114 | <i>nqrA NADH:ubiquinone oxidoreductase Na translocating A subunit</i>   |         |        |       |                        |                      |                               |         |                        |          |       |            |            |
| PG2181  | 0.171691                                                                | 7.46    | 15.5   | -1.06 | 4.52                   | Y                    |                               |         | G                      | 0.002177 | -4.82 | 1530725    | 11698131   |
| PGN0115 | <i>nqrB NADH:ubiquinone oxidoreductase Na translocating B subunit</i>   |         |        |       |                        |                      |                               |         |                        |          |       |            |            |
| PG2180  | 0.008147                                                                | 51.18   | 29.5   | 0.79  | 6.33                   | R                    |                               |         | Y                      | 0.124354 | 0.09  | 30757578   | 28166012.2 |
| PGN0116 | <i>nqrC NADH:ubiquinone oxidoreductase Na translocating C subunit</i>   |         |        |       |                        |                      |                               |         |                        |          |       |            |            |
| PG2177  | 0.706763                                                                | 102.35  | 98     | 0.06  | 7.65                   | Y                    |                               |         | Y                      | 0.027753 | -0.29 | 75576879   | 92917037.2 |
| PGN0119 | <i>nqrF NADH:ubiquinone oxidoreductase Na translocating F subunit</i>   |         |        |       |                        |                      |                               |         |                        |          |       |            |            |
| PG2175  | 0.009911                                                                | 69.3    | 41.5   | 0.74  | 6.79                   | R                    |                               |         | Y                      | 0.019902 | 1.42  | 41869166   | 14691791.6 |
| PGN0120 | <i>conserved hypothetical protein</i>                                   |         |        |       |                        |                      |                               |         |                        |          |       |            |            |
| PG2174  | 0.270049                                                                | 141.8   | 162    | -0.19 | 8.25                   | Y                    |                               |         | Y                      | 0.022021 | -0.16 | 106292485  | 118610528  |
| PGN0121 | <i>hypothetical protein PG_2174</i>                                     |         |        |       |                        |                      |                               |         |                        |          |       |            |            |
| PG2173  | 0.669653                                                                | 29.85   | 38     | -0.35 | 6.08                   | Y                    |                               |         | Y                      | 0.011504 | -0.64 | 29512392.5 | 46396646.4 |
| PGN0122 | <i>omp28 outer membrane lipoprotein Omp28</i>                           |         |        |       |                        |                      |                               |         |                        |          |       |            |            |
| PG2172  | 0.400806                                                                | 2.13    | 5      | -1.23 | 2.83                   | Y                    |                               |         | Y                      | 0.052147 | -1.65 | 66413      | 828252.2   |
| PGN0123 | <i>hypothetical protein PG_2172</i>                                     |         |        |       |                        |                      |                               |         |                        |          |       |            |            |
| PG2171  | 0.293852                                                                | 156.73  | 180    | -0.2  | 8.4                    | Y                    |                               |         | G                      | 0.003146 | -0.58 | 55894128.5 | 83529258.6 |
| PGN0125 | <i>D-isomer specific 2-hydroxyacid dehydrogenase family protein</i>     |         |        |       |                        |                      |                               |         |                        |          |       |            |            |
| PG2170  | 0.604563                                                                | 2.13    | 4      | -0.91 | 2.62                   | Y                    |                               |         | Y                      | 0.053384 | -1.37 | 66413      | 564566     |
| PGN0126 | <i>sugar transporter</i>                                                |         |        |       |                        |                      |                               |         |                        |          |       |            |            |
| PG2167  | 0.000000                                                                | 704.75  | 925    | -0.39 | 10.67                  | G                    |                               |         | Y                      | 0.055854 | -0.15 | 1.0017e+09 | 1.1184e+09 |
| PGN0128 | <i>immunoreactive 53 kDa antigen PG123</i>                              |         |        |       |                        |                      |                               |         |                        |          |       |            |            |
| PG2168  | 0.119599                                                                | 149.27  | 158    | -0.08 | 8.26                   | Y                    |                               |         | Y                      | 0.121255 | 0.12  | 106451395  | 95318163.5 |
| PGN0129 | <i>hypothetical protein PG_2168</i>                                     |         |        |       |                        |                      |                               |         |                        |          |       |            |            |
| PG2080  | 0.001904                                                                | 2.13    | 18.5   | -3.12 | 4.37                   | Y                    |                               |         | G                      | 0.009010 | -6.38 | 66413      | 5875582.6  |
| PGN0133 | <i>bioA adenosylmethionine--8-amino-7-oxononanoate aminotransferase</i> |         |        |       |                        |                      |                               |         |                        |          |       |            |            |
| PG2082  | 0.010673                                                                | 66.1    | 96     | -0.54 | 7.34                   | Y                    |                               |         | Y                      | 0.025368 | -0.55 | 80178741   | 117876921  |
| PGN0135 | <i>POT family protein</i>                                               |         |        |       |                        |                      |                               |         |                        |          |       |            |            |
| PG2083  | 0.594340                                                                | 50.11   | 62.5   | -0.32 | 6.82                   | Y                    |                               |         | Y                      | 0.017665 | -0.68 | 27847694   | 45467340.4 |
| PGN0136 | <i>hypothetical protein PG_2083</i>                                     |         |        |       |                        |                      |                               |         |                        |          |       |            |            |
| PG2085  | 0.468913                                                                | 69.3    | 87     | -0.33 | 7.29                   | Y                    |                               |         | Y                      | 0.107706 | 0.09  | 58946932   | 55199385.4 |
| PGN0137 | <i>trpS tryptophanyl-tRNA synthetase</i>                                |         |        |       |                        |                      |                               |         |                        |          |       |            |            |
| PG2086  | 0.707112                                                                | 94.89   | 94.5   | 0.01  | 7.57                   | Y                    |                               |         | Y                      | 0.052108 | 0.63  | 106365874  | 73540363.3 |
| PGN0138 | <i>hypothetical protein PG_2086</i>                                     |         |        |       |                        |                      |                               |         |                        |          |       |            |            |



| TIGR    | PgSgFn / Pg Spectral Count                                                |         |        |       |                        |                      | PgSgFn / Pg Protein Intensity |  |   |          |                        |            |            |
|---------|---------------------------------------------------------------------------|---------|--------|-------|------------------------|----------------------|-------------------------------|--|---|----------|------------------------|------------|------------|
|         | PGN                                                                       | q-value | PgSgFn | Pg    | log <sub>2</sub> Ratio | log <sub>2</sub> Sum | Regulation                    |  |   | q-value  | log <sub>2</sub> Ratio | PgSgFn     | Pg         |
| PG2088  | 0.000000                                                                  | 10.66   | 46.5   | -2.13 | 5.84                   | G                    |                               |  | G | 0.005100 | -4.76                  | 1068218    | 10963121.1 |
| PGN0140 | <i>msrA peptide methionine sulfoxide reductase</i>                        |         |        |       |                        |                      |                               |  |   |          |                        |            |            |
| PG2089  | 0.201724                                                                  | 2.13    | 11.5   | -2.43 | 3.77                   | Y                    |                               |  | Y | 0.012198 | -6.77                  | 66413      | 7936332.53 |
| PGN0141 | <i>hypothetical protein PG_2089</i>                                       |         |        |       |                        |                      |                               |  |   |          |                        |            |            |
| PG2090  | 0.604563                                                                  | 2.13    | 4      | -0.91 | 2.62                   | Y                    |                               |  | Y | 0.052108 | -1.84                  | 66413      | 1071324.25 |
| PGN0142 | <i>cation efflux family protein</i>                                       |         |        |       |                        |                      |                               |  |   |          |                        |            |            |
| PG2091  | 0.549619                                                                  | 2.13    | 9      | -2.08 | 3.48                   | Y                    |                               |  | G | 0.000019 | -5.32                  | 66413      | 2620105.1  |
| PGN0143 | <i>folB dihydroneopterin aldolase</i>                                     |         |        |       |                        |                      |                               |  |   |          |                        |            |            |
| PG2092  | 0.751373                                                                  | 35.18   | 37.5   | -0.09 | 6.18                   | Y                    |                               |  | Y | 0.170519 | 0.02                   | 14822955   | 14651116.2 |
| PGN0144 | <i>hypothetical protein PG_2092</i>                                       |         |        |       |                        |                      |                               |  |   |          |                        |            |            |
| PG2094  | 0.244618                                                                  | 2.13    | 11     | -2.37 | 3.71                   | Y                    |                               |  | Y | 0.012550 | -5.52                  | 66413      | 3333112.5  |
| PGN0145 | <i>conserved domain protein</i>                                           |         |        |       |                        |                      |                               |  |   |          |                        |            |            |
| PG2095  | 0.543202                                                                  | 2.13    | 9      | -2.08 | 3.48                   | Y                    |                               |  | G | 0.000962 | -6.01                  | 66413      | 4261250.1  |
| PGN0147 | <i>lipoprotein putative</i>                                               |         |        |       |                        |                      |                               |  |   |          |                        |            |            |
| PG2096  | 0.384046                                                                  | 10.66   | 9      | 0.24  | 4.3                    | Y                    |                               |  | Y | 0.020083 | -4.10                  | 530557     | 5422906.7  |
| PGN0148 | <i>conserved domain protein</i>                                           |         |        |       |                        |                      |                               |  |   |          |                        |            |            |
| PG2097  | 0.000003                                                                  | 381.7   | 275    | 0.47  | 9.36                   | R                    |                               |  | Y | 0.103945 | -0.07                  | 155644184  | 163521457  |
| PGN0149 | <i>prsA ribose-phosphate pyrophosphokinase</i>                            |         |        |       |                        |                      |                               |  |   |          |                        |            |            |
| PG2099  | 0.015701                                                                  | 2.13    | 15     | -2.82 | 4.1                    | Y                    |                               |  | G | 0.007002 | -5.84                  | 66413      | 3958634.43 |
| PGN0150 | <i>ATP-dependent RNA helicase DEAD/DEAH box family</i>                    |         |        |       |                        |                      |                               |  |   |          |                        |            |            |
| PG2102  | 0.766366                                                                  | 60.77   | 56.5   | 0.11  | 6.87                   | Y                    |                               |  | Y | 0.035573 | 0.39                   | 22014089   | 16604386.4 |
| PGN0152 | <i>immunoreactive 61 kDa antigen PG91</i>                                 |         |        |       |                        |                      |                               |  |   |          |                        |            |            |
| PG2105  | 0.000074                                                                  | 2.13    | 22.5   | -3.4  | 4.62                   | Y                    |                               |  | G | 0.004947 | -7.21                  | 66413      | 10095562.5 |
| PGN0154 | <i>lipoprotein putative</i>                                               |         |        |       |                        |                      |                               |  |   |          |                        |            |            |
| PG2106  | 0.000000                                                                  | 188.72  | 428.5  | -1.18 | 9.27                   | G                    |                               |  | G | 0.009741 | -0.63                  | 81577162   | 123821836  |
| PGN0156 | <i>hypothetical protein PG_2106</i>                                       |         |        |       |                        |                      |                               |  |   |          |                        |            |            |
| PG2107  | 0.000000                                                                  | 50.11   | 105    | -1.07 | 7.28                   | G                    |                               |  | G | 0.003146 | -0.61                  | 25205097   | 38302278.6 |
| PGN0157 | <i>thiH thiH protein</i>                                                  |         |        |       |                        |                      |                               |  |   |          |                        |            |            |
| PG2108  | 0.703738                                                                  | 57.57   | 68.5   | -0.25 | 6.98                   | Y                    |                               |  | Y | 0.016480 | -0.49                  | 57017455.5 | 80519945   |
| PGN0158 | <i>thiG thiG protein</i>                                                  |         |        |       |                        |                      |                               |  |   |          |                        |            |            |
| PG2109  | 0.000000                                                                  | 8.53    | 38     | -2.16 | 5.54                   | G                    |                               |  | G | 0.003160 | -5.29                  | 2219073.5  | 19740976.6 |
| PGN0159 | <i>hydroxymethylpyrimidine kinase/thiamin-phosphate pyrophosphorylase</i> |         |        |       |                        |                      |                               |  |   |          |                        |            |            |
| PG2110  | 0.283063                                                                  | 147.13  | 170    | -0.21 | 8.31                   | Y                    |                               |  | G | 0.002116 | -0.41                  | 104270922  | 138720721  |
| PGN0160 | <i>thiC thiamine biosynthesis protein ThiC</i>                            |         |        |       |                        |                      |                               |  |   |          |                        |            |            |
| PG2117  | 0.001293                                                                  | 95.96   | 56.5   | 0.76  | 7.25                   | R                    |                               |  | R | 0.003861 | 0.99                   | 117098170  | 58794274.8 |
| PGN0167 | <i>rpsP ribosomal protein S16</i>                                         |         |        |       |                        |                      |                               |  |   |          |                        |            |            |
| PG2120  | 0.720026                                                                  | 2.13    | 7.5    | -1.82 | 3.27                   | Y                    |                               |  | G | 0.002832 | -5.47                  | 66413      | 2963131.35 |
| PGN0169 | <i>metallo-beta-lactamase superfamily protein</i>                         |         |        |       |                        |                      |                               |  |   |          |                        |            |            |
| PG2121  | 0.751373                                                                  | 41.58   | 34.5   | 0.27  | 6.25                   | Y                    |                               |  | Y | 0.010514 | -0.18                  | 22274929.5 | 25282149.2 |
| PGN0170 | <i>ansA L-asparaginase</i>                                                |         |        |       |                        |                      |                               |  |   |          |                        |            |            |
| PG2124  | 0.000000                                                                  | 2744.37 | 3259.5 | -0.25 | 12.55                  | G                    |                               |  | Y | 0.052108 | -0.24                  | 1.5778e+09 | 1.8331e+09 |
| PGN0173 | <i>gapA glyceraldehyde 3-phosphate dehydrogenase type I</i>               |         |        |       |                        |                      |                               |  |   |          |                        |            |            |
| PG2125  | 0.001057                                                                  | 8.53    | 1      | 3.09  | 3.25                   | Y                    |                               |  | Y | 0.046188 | 3.20                   | 418644.5   | 23108.5    |
| PGN0174 | <i>transcriptional regulator AraC family</i>                              |         |        |       |                        |                      |                               |  |   |          |                        |            |            |
| PG2126  | 0.034356                                                                  | 28.79   | 44.5   | -0.63 | 6.2                    | Y                    |                               |  | Y | 0.028575 | -1.13                  | 3455277    | 7464610.05 |
| PGN0175 | <i>conserved hypothetical protein TIGR00044</i>                           |         |        |       |                        |                      |                               |  |   |          |                        |            |            |
| PG2127  | 0.023824                                                                  | 35.18   | 59.5   | -0.76 | 6.56                   | Y                    |                               |  | Y | 0.032387 | -0.32                  | 19956343.5 | 25193696.4 |
| PGN0176 | <i>hypothetical protein PG_2127</i>                                       |         |        |       |                        |                      |                               |  |   |          |                        |            |            |

| TIGR             | PgSgFn / Pg Spectral Count                                |         |        |       |                        |                      |            | PgSgFn / Pg Protein Intensity |                        |          |       |            |            |
|------------------|-----------------------------------------------------------|---------|--------|-------|------------------------|----------------------|------------|-------------------------------|------------------------|----------|-------|------------|------------|
|                  | PGN                                                       | q-value | PgSgFn | Pg    | log <sub>2</sub> Ratio | log <sub>2</sub> Sum | Regulation | q-value                       | log <sub>2</sub> Ratio | PgSgFn   | Pg    |            |            |
| PG2130           | 0.751373                                                  | 23.46   | 20.5   | 0.19  | 5.46                   | Y                    |            |                               | Y                      | 0.014264 | -0.84 | 8826782.5  | 16018503.7 |
| PGN0178          | <i>hypothetical protein PG_2130</i>                       |         |        |       |                        |                      |            |                               |                        |          |       |            |            |
| PG2131           | 0.029238                                                  | 219.63  | 268.5  | -0.29 | 8.93                   | Y                    |            |                               | G                      | 0.000161 | -0.27 | 164682512  | 198569303  |
| PGN0179          | <i>60 kDa protein</i>                                     |         |        |       |                        |                      |            |                               |                        |          |       |            |            |
| P13793IFMA_PORGI | 0.000000                                                  | 1954.32 | 3042   | -0.64 | 12.29                  | G                    |            |                               | Y                      | 0.073682 | -0.22 | 954032009  | 1.0887e+09 |
| PGN0180          | <i>major fimbriin A, Porphyromonas gingivalis 33277</i>   |         |        |       |                        |                      |            |                               |                        |          |       |            |            |
| PG2134           | 0.004290                                                  | 10.66   | 26.5   | -1.31 | 5.22                   | G                    |            |                               | Y                      | 0.037727 | -3.89 | 6048720.5  | 14645875.9 |
| PGN0183          | <i>lipoprotein putative</i>                               |         |        |       |                        |                      |            |                               |                        |          |       |            |            |
| PG2139           | 0.468582                                                  | 2.13    | 9      | -2.08 | 3.48                   | Y                    |            |                               | Y                      | 0.035857 | -3.96 | 66413      | 1554353.7  |
| PGN0187          | <i>hypothetical protein PG_2139</i>                       |         |        |       |                        |                      |            |                               |                        |          |       |            |            |
| PG2140           | 0.594734                                                  | 20.26   | 13     | 0.64  | 5.06                   | Y                    |            |                               | Y                      | 0.063017 | 0.14  | 3439388    | 3140245.35 |
| PGN0188          | <i>rpmF ribosomal protein L32</i>                         |         |        |       |                        |                      |            |                               |                        |          |       |            |            |
| PG2141           | 0.000252                                                  | 122.61  | 183    | -0.58 | 8.26                   | G                    |            |                               | G                      | 0.006530 | -0.93 | 71402955   | 137293027  |
| PGN0189          | <i>fabH 3-oxoacyl-(acyl-carrier-protein) synthase III</i> |         |        |       |                        |                      |            |                               |                        |          |       |            |            |
| PG2142           | 0.250677                                                  | 10.66   | 15.5   | -0.54 | 4.71                   | Y                    |            |                               | Y                      | 0.091569 | -3.28 | 5901502.5  | 9190348.93 |
| PGN0190          | <i>era GTP-binding protein Era</i>                        |         |        |       |                        |                      |            |                               |                        |          |       |            |            |
| PG2143           | 0.056869                                                  | 25.59   | 41     | -0.68 | 6.06                   | Y                    |            |                               | G                      | 0.005259 | -0.53 | 11105769   | 15942996.1 |
| PGN0191          | <i>GTP-binding protein Era/ThdF family</i>                |         |        |       |                        |                      |            |                               |                        |          |       |            |            |
| PG2144           | 0.621265                                                  | 61.84   | 73.5   | -0.25 | 7.08                   | Y                    |            |                               | G                      | 0.006605 | -0.24 | 35258539   | 41675895.6 |
| PGN0192          | <i>hypothetical protein PG_2144</i>                       |         |        |       |                        |                      |            |                               |                        |          |       |            |            |
| PG2145           | 0.751373                                                  | 2.13    | 7      | -1.72 | 3.19                   | Y                    |            |                               | Y                      | 0.014264 | -4.82 | 66413      | 2074907.5  |
| PGN0193          | <i>polysaccharide deacetylase</i>                         |         |        |       |                        |                      |            |                               |                        |          |       |            |            |
| PG2147           | 0.667335                                                  | 2.13    | 8      | -1.91 | 3.34                   | Y                    |            |                               | G                      | 0.000766 | -5.52 | 66413      | 3019948.1  |
| PGN0195          | <i>xpt xanthine phosphoribosyltransferase</i>             |         |        |       |                        |                      |            |                               |                        |          |       |            |            |
| PG2149           | 0.423387                                                  | 2.13    | 9.5    | -2.16 | 3.54                   | Y                    |            |                               | Y                      | 0.018791 | -6.15 | 66413      | 5537261.98 |
| PGN0197          | <i>hypothetical protein PG_2149</i>                       |         |        |       |                        |                      |            |                               |                        |          |       |            |            |
| PG2150           | 0.000046                                                  | 6.4     | 30     | -2.23 | 5.19                   | G                    |            |                               | G                      | 0.007211 | -4.39 | 2675015.5  | 11497716.6 |
| PGN0198          | <i>LysM domain protein</i>                                |         |        |       |                        |                      |            |                               |                        |          |       |            |            |
| PG2155           | 0.751373                                                  | 59.71   | 51     | 0.23  | 6.79                   | Y                    |            |                               | Y                      | 0.146675 | 0.08  | 37096520   | 35447450.7 |
| PGN0200          | <i>lipoprotein putative</i>                               |         |        |       |                        |                      |            |                               |                        |          |       |            |            |
| PG2156           | 0.667335                                                  | 2.13    | 8      | -1.91 | 3.34                   | Y                    |            |                               | Y                      | 0.043161 | -6.63 | 66413      | 13317526   |
| PGN0201          | <i>conserved hypothetical protein TIGR00046</i>           |         |        |       |                        |                      |            |                               |                        |          |       |            |            |
| PG2157           | 0.777944                                                  | 54.38   | 60     | -0.14 | 6.84                   | Y                    |            |                               | G                      | 0.001987 | -0.49 | 32933674.5 | 46184709   |
| PGN0202          | <i>glutamine cyclotransferase-related protein</i>         |         |        |       |                        |                      |            |                               |                        |          |       |            |            |
| PG2158           | 0.091012                                                  | 8.53    | 19     | -1.16 | 4.78                   | Y                    |            |                               | Y                      | 0.015947 | -3.80 | 3258761.5  | 9745822.43 |
| PGN0203          | <i>conserved hypothetical protein</i>                     |         |        |       |                        |                      |            |                               |                        |          |       |            |            |
| PG2159           | 0.005139                                                  | 2.13    | 17.5   | -3.04 | 4.29                   | Y                    |            |                               | G                      | 0.000986 | -6.29 | 66413      | 5169838.98 |
| PGN0204          | <i>protoporphyrinogen oxidase</i>                         |         |        |       |                        |                      |            |                               |                        |          |       |            |            |
| PG2162           | 0.516095                                                  | 7.46    | 12     | -0.69 | 4.28                   | Y                    |            |                               | Y                      | 0.111797 | -2.17 | 1512760.5  | 2150215.15 |
| PGN0206          | <i>lpxB lipid A disaccharide synthase</i>                 |         |        |       |                        |                      |            |                               |                        |          |       |            |            |
| PG2163           | 0.008983                                                  | 10.66   | 23.5   | -1.14 | 5.09                   | G                    |            |                               | Y                      | 0.177260 | -3.39 | 10638742   | 11510265   |
| PGN0207          | <i>surE stationary-phase survival protein SurE</i>        |         |        |       |                        |                      |            |                               |                        |          |       |            |            |
| PG2164           | 0.037701                                                  | 60.77   | 38     | 0.68  | 6.63                   | Y                    |            |                               | Y                      | 0.052108 | 0.16  | 36209961.5 | 32563934.2 |
| PGN0208          | <i>peptidyl-prolyl cis-trans isomerase FKBP-type</i>      |         |        |       |                        |                      |            |                               |                        |          |       |            |            |
| PG2165           | 0.648731                                                  | 104.49  | 115.5  | -0.14 | 7.78                   | Y                    |            |                               | R                      | 0.003126 | 0.37  | 107562538  | 83219095.8 |
| PGN0209          | <i>glyS glycyl-tRNA synthetase</i>                        |         |        |       |                        |                      |            |                               |                        |          |       |            |            |
| PG2078           | 0.000903                                                  | 13.86   | 28.5   | -1.04 | 5.4                    | G                    |            |                               | Y                      | 0.145853 | -3.52 | 9637101    | 11996317.9 |
| PGN0211          | <i>conserved hypothetical protein</i>                     |         |        |       |                        |                      |            |                               |                        |          |       |            |            |

| TIGR    | PgSgFn / Pg Spectral Count                                                |         |        |       |                        |                      | PgSgFn / Pg Protein Intensity |         |                        |          |       |            |            |
|---------|---------------------------------------------------------------------------|---------|--------|-------|------------------------|----------------------|-------------------------------|---------|------------------------|----------|-------|------------|------------|
|         | PGN                                                                       | q-value | PgSgFn | Pg    | log <sub>2</sub> Ratio | log <sub>2</sub> Sum | Regulation                    | q-value | log <sub>2</sub> Ratio | PgSgFn   | Pg    |            |            |
| PG0104  | 0.039368                                                                  | 2.13    | 14.5   | -2.77 | 4.06                   | Y                    |                               |         | G                      | 0.001091 | -6.21 | 66413      | 4878730.4  |
| PGN0221 | <i>topB-1 DNA topoisomerase III</i>                                       |         |        |       |                        |                      |                               |         |                        |          |       |            |            |
| PG0108  | 0.335331                                                                  | 70.37   | 87     | -0.31 | 7.3                    | Y                    |                               |         | Y                      | 0.099350 | -0.13 | 32022370.5 | 34745253.8 |
| PGN0224 | <i>epsD UDP-N-acetyl-D-mannosaminuronic acid dehydrogenase</i>            |         |        |       |                        |                      |                               |         |                        |          |       |            |            |
| PG0119  | 0.006508                                                                  | 39.45   | 20     | 0.98  | 5.89                   | R                    |                               |         | Y                      | 0.056585 | -0.73 | 6494815.5  | 10444360.9 |
| PGN0233 | <i>glycosyl transferase WecB/TagA/CpsF family</i>                         |         |        |       |                        |                      |                               |         |                        |          |       |            |            |
| PG0120  | 0.001477                                                                  | 71.43   | 112    | -0.65 | 7.52                   | G                    |                               |         | G                      | 0.000584 | -0.12 | 36447759   | 39739665.3 |
| PGN0234 | <i>epsC UDP-N-acetylglucosamine 2-epimerase</i>                           |         |        |       |                        |                      |                               |         |                        |          |       |            |            |
| PG0121  | 0.000000                                                                  | 943.58  | 701    | 0.43  | 10.68                  | R                    |                               |         | Y                      | 0.147498 | 0.03  | 1.0492e+09 | 1.0177e+09 |
| PGN0235 | <i>hup-1 DNA-binding protein HU</i>                                       |         |        |       |                        |                      |                               |         |                        |          |       |            |            |
| PG0125  | 0.543202                                                                  | 2.13    | 9      | -2.08 | 3.48                   | Y                    |                               |         | Y                      | 0.015386 | -5.39 | 66413      | 3124207.1  |
| PGN0238 | <i>hypothetical protein PG_0125</i>                                       |         |        |       |                        |                      |                               |         |                        |          |       |            |            |
| PG0126  | 0.720026                                                                  | 26.65   | 20.5   | 0.38  | 5.56                   | Y                    |                               |         | Y                      | 0.103945 | 0.10  | 13191995.5 | 12401596.7 |
| PGN0239 | <i>type I phosphodiesterase/nucleotide pyrophosphatase family protein</i> |         |        |       |                        |                      |                               |         |                        |          |       |            |            |
| PG0128  | 0.278503                                                                  | 2.13    | 10.5   | -2.3  | 3.66                   | Y                    |                               |         | G                      | 0.000381 | -6.26 | 66413      | 5032655.23 |
| PGN0241 | <i>conserved domain protein</i>                                           |         |        |       |                        |                      |                               |         |                        |          |       |            |            |
| PG0129  | 0.004789                                                                  | 2.13    | 17.5   | -3.04 | 4.29                   | Y                    |                               |         | G                      | 0.003852 | -7.16 | 66413      | 9641296.35 |
| PGN0242 | <i>mannosyltransferase</i>                                                |         |        |       |                        |                      |                               |         |                        |          |       |            |            |
| PG0130  | 0.000000                                                                  | 413.68  | 256.5  | 0.69  | 9.39                   | R                    |                               |         | R                      | 0.006502 | 0.31  | 341591951  | 276323574  |
| PGN0243 | <i>gpm phosphoglycerate mutase</i>                                        |         |        |       |                        |                      |                               |         |                        |          |       |            |            |
| PG0134  | 0.327141                                                                  | 17.06   | 27.5   | -0.69 | 5.48                   | Y                    |                               |         | G                      | 0.003547 | -0.66 | 5909573.5  | 9326663.45 |
| PGN0247 | <i>mgfE magnesium transporter</i>                                         |         |        |       |                        |                      |                               |         |                        |          |       |            |            |
| PG0135  | 0.671572                                                                  | 20.26   | 14     | 0.53  | 5.1                    | Y                    |                               |         | Y                      | 0.053939 | -0.32 | 5951048.5  | 7292105.03 |
| PGN0248 | <i>ksgA dimethyladenosine transferase</i>                                 |         |        |       |                        |                      |                               |         |                        |          |       |            |            |
| PG0136  | 0.336169                                                                  | 2.13    | 10.5   | -2.3  | 3.66                   | Y                    |                               |         | G                      | 0.006011 | -5.67 | 66413      | 3486804    |
| PGN0249 | <i>hypothetical protein PG_0136</i>                                       |         |        |       |                        |                      |                               |         |                        |          |       |            |            |
| PG0137  | 0.006441                                                                  | 204.71  | 249    | -0.28 | 8.83                   | G                    |                               |         | G                      | 0.001602 | -0.53 | 132006149  | 190668333  |
| PGN0250 | <i>pepD-1 aminoacyl-histidine dipeptidase</i>                             |         |        |       |                        |                      |                               |         |                        |          |       |            |            |
| PG0138  | 0.166597                                                                  | 317.72  | 276.5  | 0.2   | 9.21                   | Y                    |                               |         | Y                      | 0.064220 | 0.10  | 415543450  | 387398784  |
| PGN0251 | <i>fabD malonyl CoA-acyl carrier protein transacylase</i>                 |         |        |       |                        |                      |                               |         |                        |          |       |            |            |
| PG0139  | 0.273687                                                                  | 2.13    | 11     | -2.37 | 3.71                   | Y                    |                               |         | G                      | 0.000605 | -5.75 | 66413      | 3535477.88 |
| PGN0252 | <i>membrane-bound lytic murein transglycosylase D putative</i>            |         |        |       |                        |                      |                               |         |                        |          |       |            |            |
| PG0141  | 0.031975                                                                  | 21.32   | 36.5   | -0.78 | 5.85                   | Y                    |                               |         | G                      | 0.009529 | -0.74 | 11360222.5 | 18824805   |
| PGN0254 | <i>spo0J spoOJ protein</i>                                                |         |        |       |                        |                      |                               |         |                        |          |       |            |            |
| PG0142  | 0.630045                                                                  | 2.13    | 8      | -1.91 | 3.34                   | Y                    |                               |         | G                      | 0.003939 | -6.63 | 66413      | 6666694.5  |
| PGN0255 | <i>soj SpoOJ regulator protein</i>                                        |         |        |       |                        |                      |                               |         |                        |          |       |            |            |
| PG0143  | 0.751373                                                                  | 20.26   | 24.5   | -0.27 | 5.48                   | Y                    |                               |         | Y                      | 0.011148 | -0.78 | 13754427.5 | 22810262   |
| PGN0256 | <i>hydrolase carbon-nitrogen family</i>                                   |         |        |       |                        |                      |                               |         |                        |          |       |            |            |
| PG0144  | 0.015701                                                                  | 34.12   | 58     | -0.77 | 6.53                   | Y                    |                               |         | G                      | 0.001455 | -1.31 | 10160389.5 | 25131094.3 |
| PGN0257 | <i>conserved hypothetical protein</i>                                     |         |        |       |                        |                      |                               |         |                        |          |       |            |            |
| PG0147  | 0.784897                                                                  | 2.13    | 2      | 0.09  | 2.05                   | Y                    |                               |         | Y                      | 0.052485 | -1.57 | 66413      | 734684.75  |
| PGN0260 | <i>hypothetical protein PG_0147</i>                                       |         |        |       |                        |                      |                               |         |                        |          |       |            |            |
| PG0148  | 0.017364                                                                  | 8.53    | 21.5   | -1.33 | 4.91                   | Y                    |                               |         | Y                      | 0.193910 | -3.25 | 10634858   | 10626809.6 |
| PGN0261 | <i>sigma-54-dependent transcriptional regulator</i>                       |         |        |       |                        |                      |                               |         |                        |          |       |            |            |
| PG0149  | 0.543202                                                                  | 2.13    | 9      | -2.08 | 3.48                   | Y                    |                               |         | G                      | 0.009241 | -5.80 | 66413      | 3937145.9  |
| PGN0262 | <i>conserved domain protein</i>                                           |         |        |       |                        |                      |                               |         |                        |          |       |            |            |
| PG0150  | 0.083593                                                                  | 10.66   | 9      | 0.24  | 4.3                    | Y                    |                               |         | Y                      | 0.177260 | -2.11 | 2517021    | 2318493.83 |
| PGN0263 | <i>conserved hypothetical protein TIGR01125</i>                           |         |        |       |                        |                      |                               |         |                        |          |       |            |            |

| TIGR    | PgSgFn / Pg Spectral Count                                          |        |        |                        |                      |                                                                                                                                                                             | PgSgFn / Pg Protein Intensity |                        |            |            |  |  |
|---------|---------------------------------------------------------------------|--------|--------|------------------------|----------------------|-----------------------------------------------------------------------------------------------------------------------------------------------------------------------------|-------------------------------|------------------------|------------|------------|--|--|
|         | q-value                                                             | PgSgFn | Pg     | log <sub>2</sub> Ratio | log <sub>2</sub> Sum | Regulation                                                                                                                                                                  | q-value                       | log <sub>2</sub> Ratio | PgSgFn     | Pg         |  |  |
| PG0151  | 0.000813                                                            | 39.45  | 68.5   | -0.8                   | 6.75                 | G   Y     | 0.027198                      | -0.66                  | 11724111   | 18491458.9 |  |  |
| PGN0264 | <i>ftsY signal recognition particle-docking protein FtsY</i>        |        |        |                        |                      |                                                                                                                                                                             |                               |                        |            |            |  |  |
| PG0152  | 0.004364                                                            | 2.13   | 17.5   | -3.04                  | 4.29                 | Y   G     | 0.000238                      | -6.59                  | 66413      | 6332466.53 |  |  |
| PGN0265 | <i>nspC carboxynorspermidine decarboxylase</i>                      |        |        |                        |                      |                                                                                                                                                                             |                               |                        |            |            |  |  |
| PG0153  | 0.784897                                                            | 206.84 | 196.5  | 0.07                   | 8.66                 | Y   Y     | 0.166018                      | 0.01                   | 160413108  | 159528651  |  |  |
| PGN0266 | <i>aspS aspartyl-tRNA synthetase</i>                                |        |        |                        |                      |                                                                                                                                                                             |                               |                        |            |            |  |  |
| PG0159  | 0.000000                                                            | 993.69 | 1334   | -0.42                  | 11.18                | G   Y     | 0.055138                      | -0.10                  | 752395255  | 807987810  |  |  |
| PGN0271 | <i>pepO endopeptidase PepO</i>                                      |        |        |                        |                      |                                                                                                                                                                             |                               |                        |            |            |  |  |
| PG0160  | 0.560362                                                            | 126.88 | 126.5  | 0                      | 7.99                 | Y   Y     | 0.071070                      | 0.39                   | 85075030.5 | 63745050.2 |  |  |
| PGN0272 | <i>conserved domain protein</i>                                     |        |        |                        |                      |                                                                                                                                                                             |                               |                        |            |            |  |  |
| PG0163  | 0.786859                                                            | 27.72  | 29     | -0.07                  | 5.83                 | Y   Y     | 0.022021                      | 0.29                   | 13621052.5 | 11199275.3 |  |  |
| PGN0275 | <i>pfk phosphofructokinase</i>                                      |        |        |                        |                      |                                                                                                                                                                             |                               |                        |            |            |  |  |
| PG0166  | 0.779998                                                            | 2.13   | 2.5    | -0.23                  | 2.21                 | Y   Y     | 0.052108                      | -2.04                  | 66413      | 1832715    |  |  |
| PGN0278 | <i>pth peptidyl-tRNA hydrolase</i>                                  |        |        |                        |                      |                                                                                                                                                                             |                               |                        |            |            |  |  |
| PG0167  | 0.337844                                                            | 224.97 | 201.5  | 0.16                   | 8.74                 | Y   Y     | 0.183324                      | -0.00                  | 290682261  | 287752958  |  |  |
| PGN0279 | <i>rplY ribosomal protein L25</i>                                   |        |        |                        |                      |                                                                                                                                                                             |                               |                        |            |            |  |  |
| PG0170  | 0.035356                                                            | 277.21 | 228    | 0.28                   | 8.98                 | Y   G     | 0.003547                      | -0.08                  | 157839514  | 166932099  |  |  |
| PGN0281 | <i>metG methionyl-tRNA synthetase</i>                               |        |        |                        |                      |                                                                                                                                                                             |                               |                        |            |            |  |  |
| PG0171  | 0.648731                                                            | 24.52  | 27     | -0.14                  | 5.69                 | Y   Y     | 0.179184                      | 0.11                   | 9248078.5  | 9024560.3  |  |  |
| PGN0282 | <i>5'-nucleotidase family protein</i>                               |        |        |                        |                      |                                                                                                                                                                             |                               |                        |            |            |  |  |
| PG0174  | 0.267463                                                            | 9.6    | 15.5   | -0.69                  | 4.65                 | Y   Y     | 0.017881                      | -3.27                  | 1726161    | 4899686.63 |  |  |
| PGN0286 | <i>pyridine nucleotide-disulphide oxidoreductase family protein</i> |        |        |                        |                      |                                                                                                                                                                             |                               |                        |            |            |  |  |
| PG0179  | 0.098759                                                            | 200.44 | 240    | -0.26                  | 8.78                 | Y   Y     | 0.147498                      | 0.07                   | 150218239  | 144809297  |  |  |
| PGN0288 | <i>hypothetical protein PG_0179</i>                                 |        |        |                        |                      |                                                                                                                                                                             |                               |                        |            |            |  |  |
| PG0180  | 0.003180                                                            | 74.63  | 111.5  | -0.58                  | 7.54                 | G   G | 0.006461                      | -0.80                  | 47581413.5 | 82171950.4 |  |  |
| PGN0289 | <i>lipoprotein putative</i>                                         |        |        |                        |                      |                                                                                                                                                                             |                               |                        |            |            |  |  |
| PG0181  | 0.648731                                                            | 138.6  | 121.5  | 0.19                   | 8.02                 | Y   Y | 0.121255                      | -0.04                  | 108729237  | 111945438  |  |  |
| PGN0290 | <i>immunoreactive 32 kDa antigen PG49</i>                           |        |        |                        |                      |                                                                                                                                                                             |                               |                        |            |            |  |  |
| PG0182  | 0.728841                                                            | 186.58 | 198    | -0.09                  | 8.59                 | Y   G | 0.000238                      | -0.41                  | 99981015.5 | 132616804  |  |  |
| PGN0291 | <i>von Willebrand factor type A domain protein</i>                  |        |        |                        |                      |                                                                                                                                                                             |                               |                        |            |            |  |  |
| PG0185  | 0.000000                                                            | 1643   | 1329.5 | 0.31                   | 11.54                | R   Y | 0.011171                      | -0.18                  | 1.1843e+09 | 1.3433e+09 |  |  |
| PGN0293 | <i>ragA ragA protein</i>                                            |        |        |                        |                      |                                                                                                                                                                             |                               |                        |            |            |  |  |
| PG0186  | 0.262411                                                            | 10.66  | 15     | -0.49                  | 4.68                 | Y   Y | 0.010409                      | -1.46                  | 108537.5   | 291160.05  |  |  |
| PGN0294 | <i>ragB lipoprotein RagB</i>                                        |        |        |                        |                      |                                                                                                                                                                             |                               |                        |            |            |  |  |
| PG0188  | 0.012680                                                            | 50.11  | 79.5   | -0.67                  | 7.02                 | Y   Y | 0.020985                      | -1.42                  | 25298628   | 68515843.8 |  |  |
| PGN0296 | <i>lipoprotein putative</i>                                         |        |        |                        |                      |                                                                                                                                                                             |                               |                        |            |            |  |  |
| PG0190  | 0.028913                                                            | 12.79  | 18     | -0.49                  | 4.94                 | Y   Y | 0.028659                      | -4.09                  | 3409252    | 11492669.7 |  |  |
| PGN0298 | <i>uppS undecaprenyl diphosphate synthase</i>                       |        |        |                        |                      |                                                                                                                                                                             |                               |                        |            |            |  |  |
| PG0191  | 0.659176                                                            | 117.28 | 108.5  | 0.11                   | 7.82                 | Y   Y | 0.052147                      | -0.26                  | 77872724   | 95190563.8 |  |  |
| PGN0299 | <i>outer membrane protein putative</i>                              |        |        |                        |                      |                                                                                                                                                                             |                               |                        |            |            |  |  |
| PG0192  | 0.000000                                                            | 379.56 | 232.5  | 0.71                   | 9.26                 | R   R | 0.003925                      | 0.24                   | 191541166  | 162438751  |  |  |
| PGN0300 | <i>ompH-1 cationic outer membrane protein OmpH</i>                  |        |        |                        |                      |                                                                                                                                                                             |                               |                        |            |            |  |  |
| PG0193  | 0.009141                                                            | 190.85 | 145    | 0.4                    | 8.39                 | R   R | 0.004348                      | 0.49                   | 241036566  | 171034153  |  |  |
| PGN0301 | <i>ompH-2 cationic outer membrane protein OmpH</i>                  |        |        |                        |                      |                                                                                                                                                                             |                               |                        |            |            |  |  |
| PG0195  | 0.000000                                                            | 33.05  | 129    | -1.96                  | 7.34                 | G   G | 0.000137                      | -1.61                  | 17436723   | 53034778.5 |  |  |
| PGN0302 | <i>rubrerythrin</i>                                                 |        |        |                        |                      |                                                                                                                                                                             |                               |                        |            |            |  |  |
| PG0196  | 0.001057                                                            | 933.98 | 845    | 0.14                   | 10.8                 | R   Y | 0.035292                      | 0.19                   | 719917664  | 633712229  |  |  |
| PGN0303 | <i>peptidase M16 family</i>                                         |        |        |                        |                      |                                                                                                                                                                             |                               |                        |            |            |  |  |

| TIGR    | PgSgFn / Pg Spectral Count                                                         |         |        |       |                        |                      |                                                                                                                                                                          | PgSgFn / Pg Protein Intensity |                        |        |            |            |  |
|---------|------------------------------------------------------------------------------------|---------|--------|-------|------------------------|----------------------|--------------------------------------------------------------------------------------------------------------------------------------------------------------------------|-------------------------------|------------------------|--------|------------|------------|--|
|         | PGN                                                                                | q-value | PgSgFn | Pg    | log <sub>2</sub> Ratio | log <sub>2</sub> Sum | Regulation                                                                                                                                                               | q-value                       | log <sub>2</sub> Ratio | PgSgFn | Pg         |            |  |
| PG0198  | 0.660293                                                                           | 2.13    | 8      | -1.91 | 3.34                   | Y                    |       | G                             | 0.001694               | -5.97  | 66413      | 4161931    |  |
| PGN0306 | <i>conserved hypothetical protein</i>                                              |         |        |       |                        |                      |                                                                                                                                                                          |                               |                        |        |            |            |  |
| PG0202  | 0.000000                                                                           | 8.53    | 52.5   | -2.62 | 5.93                   | G                    |       | G                             | 0.002140               | -5.48  | 3153845    | 26644374.8 |  |
| PGN0310 | <i>uroporphyrinogen-III synthase HemD putative</i>                                 |         |        |       |                        |                      |                                                                                                                                                                          |                               |                        |        |            |            |  |
| PG0205  | 0.043660                                                                           | 26.65   | 46.5   | -0.8  | 6.19                   | Y                    |       | Y                             | 0.048991               | -0.59  | 9906366    | 13900846.7 |  |
| PGN0313 | <i>prfC peptide chain release factor 3</i>                                         |         |        |       |                        |                      |                                                                                                                                                                          |                               |                        |        |            |            |  |
| PG0210  | 0.779998                                                                           | 2.13    | 6      | -1.49 | 3.02                   | Y                    |       | Y                             | 0.010656               | -4.30  | 66413      | 1395692.5  |  |
| PGN0315 | <i>precorrin-6x reductase/cobalamin biosynthetic protein CbiD</i>                  |         |        |       |                        |                      |                                                                                                                                                                          |                               |                        |        |            |            |  |
| PG0211  | 0.475857                                                                           | 2.13    | 9.5    | -2.16 | 3.54                   | Y                    |       | G                             | 0.009241               | -6.18  | 66413      | 5114360.15 |  |
| PGN0316 | <i>cbiGF cobalamin biosynthesis protein CbiG/precorrin-4 C11-methyltransferase</i> |         |        |       |                        |                      |                                                                                                                                                                          |                               |                        |        |            |            |  |
| PG0212  | 0.660293                                                                           | 2.13    | 8      | -1.91 | 3.34                   | Y                    |       | G                             | 0.001602               | -5.43  | 66413      | 2867950.38 |  |
| PGN0317 | <i>cobL precorrin-6Y C515-methyltransferase decarboxylating</i>                    |         |        |       |                        |                      |                                                                                                                                                                          |                               |                        |        |            |            |  |
| PG0213  | 0.000838                                                                           | 7.46    | 27     | -1.86 | 5.11                   | G                    |       | Y                             | 0.013141               | -3.88  | 2605088    | 9324048.85 |  |
| PGN0318 | <i>precorrin-3 methylase/precorrin-8X methylmutase</i>                             |         |        |       |                        |                      |                                                                                                                                                                          |                               |                        |        |            |            |  |
| PG0217  | 0.549877                                                                           | 21.32   | 30     | -0.49 | 5.68                   | Y                    |       | Y                             | 0.019165               | -0.96  | 12452859.5 | 24877507.1 |  |
| PGN0322 | <i>hypothetical protein PG_0217</i>                                                |         |        |       |                        |                      |                                                                                                                                                                          |                               |                        |        |            |            |  |
| PG0218  | 0.720026                                                                           | 2.13    | 7.5    | -1.82 | 3.27                   | Y                    |       | G                             | 0.001242               | -6.25  | 66413      | 5030806.5  |  |
| PGN0323 | <i>hypothetical protein PG_0218</i>                                                |         |        |       |                        |                      |                                                                                                                                                                          |                               |                        |        |            |            |  |
| PG0226  | 0.001268                                                                           | 476.59  | 387.5  | 0.3   | 9.76                   | R                    |       | G                             | 0.007211               | -0.25  | 220140867  | 261015848  |  |
| PGN0329 | <i>transglutaminase-related protein</i>                                            |         |        |       |                        |                      |                                                                                                                                                                          |                               |                        |        |            |            |  |
| PG0227  | 0.001293                                                                           | 2.13    | 18     | -3.08 | 4.33                   | Y                    |       | Y                             | 0.022019               | -5.33  | 66413      | 3234392.78 |  |
| PGN0330 | <i>radA DNA repair protein RadA</i>                                                |         |        |       |                        |                      |                                                                                                                                                                          |                               |                        |        |            |            |  |
| PG0228  | 0.707112                                                                           | 41.58   | 38.5   | 0.11  | 6.32                   | Y                    |       | Y                             | 0.040771               | 0.21   | 26610621   | 22851811.2 |  |
| PGN0331 | <i>DdaH family protein</i>                                                         |         |        |       |                        |                      |                                                                                                                                                                          |                               |                        |        |            |            |  |
| PG0230  | 0.013991                                                                           | 318.79  | 326.5  | -0.03 | 9.33                   | Y                    |   | Y                             | 0.179184               | 0.01   | 255084871  | 253439430  |  |
| PGN0333 | <i>transaldolase TalC putative</i>                                                 |         |        |       |                        |                      |                                                                                                                                                                          |                               |                        |        |            |            |  |
| PG0231  | 0.216301                                                                           | 2.13    | 11.5   | -2.43 | 3.77                   | Y                    |   | G                             | 0.003885               | -7.67  | 66413      | 13678978.1 |  |
| PGN0334 | <i>conserved hypothetical protein</i>                                              |         |        |       |                        |                      |                                                                                                                                                                          |                               |                        |        |            |            |  |
| PG0232  | 0.012680                                                                           | 632.25  | 593.5  | 0.09  | 10.26                  | Y                    |   | Y                             | 0.167293               | 0.08   | 554581265  | 538007845  |  |
| PGN0335 | <i>zinc carboxypeptidase putative</i>                                              |         |        |       |                        |                      |                                                                                                                                                                          |                               |                        |        |            |            |  |
| PG0235  | 0.751373                                                                           | 2.13    | 3      | -0.49 | 2.36                   | Y                    |   | Y                             | 0.084882               | -0.26  | 66413      | 130699     |  |
| PGN0340 | <i>carboxyl-terminal protease</i>                                                  |         |        |       |                        |                      |                                                                                                                                                                          |                               |                        |        |            |            |  |
| PG0236  | 0.158167                                                                           | 8.53    | 14     | -0.71 | 4.49                   | Y                    |   | Y                             | 0.116286               | -3.45  | 8861345    | 13840866.6 |  |
| PGN0341 | <i>hypothetical protein PG_0236</i>                                                |         |        |       |                        |                      |                                                                                                                                                                          |                               |                        |        |            |            |  |
| PG0237  | 0.560362                                                                           | 2.13    | 8.5    | -2    | 3.41                   | Y                    |   | G                             | 0.001850               | -5.32  | 66413      | 2644811.33 |  |
| PGN0342 | <i>ung uracil-DNA glycosylase</i>                                                  |         |        |       |                        |                      |                                                                                                                                                                          |                               |                        |        |            |            |  |
| PG0240  | 0.758093                                                                           | 2.13    | 6.5    | -1.61 | 3.11                   | Y                    |   | Y                             | 0.023101               | -5.17  | 66413      | 2950794    |  |
| PGN0344 | <i>hydrolase haloacid dehalogenase-like family</i>                                 |         |        |       |                        |                      |                                                                                                                                                                          |                               |                        |        |            |            |  |
| PG0241  | 0.067161                                                                           | 122.61  | 93.5   | 0.39  | 7.76                   | Y                    |   | Y                             | 0.014837               | -0.29  | 171546139  | 210917196  |  |
| PGN0345 | <i>lipoprotein putative</i>                                                        |         |        |       |                        |                      |                                                                                                                                                                          |                               |                        |        |            |            |  |
| PG0242  | 0.009824                                                                           | 2.13    | 16.5   | -2.95 | 4.22                   | Y                    |   | G                             | 0.003547               | -6.55  | 66413      | 6272651.53 |  |
| PGN0346 | <i>conserved hypothetical protein TIGR00096</i>                                    |         |        |       |                        |                      |                                                                                                                                                                          |                               |                        |        |            |            |  |
| PG0243  | 0.784897                                                                           | 22.39   | 20     | 0.16  | 5.41                   | Y                    |   | Y                             | 0.165042               | 0.04   | 12019403.5 | 11542324.8 |  |
| PGN0347 | <i>hypothetical protein PG_0243</i>                                                |         |        |       |                        |                      |                                                                                                                                                                          |                               |                        |        |            |            |  |
| PG0245  | 0.000001                                                                           | 518.17  | 389.5  | 0.41  | 9.83                   | R                    |   | Y                             | 0.046400               | -0.04  | 273102809  | 281601165  |  |
| PGN0348 | <i>universal stress protein family</i>                                             |         |        |       |                        |                      |                                                                                                                                                                          |                               |                        |        |            |            |  |
| PG0246  | 0.000000                                                                           | 47.98   | 124    | -1.37 | 7.43                   | G                    |   | G                             | 0.009208               | -0.41  | 87558320   | 115662344  |  |
| PGN0349 | <i>hypothetical protein PG_0246</i>                                                |         |        |       |                        |                      |                                                                                                                                                                          |                               |                        |        |            |            |  |

| TIGR    | PgSgFn / Pg Spectral Count                                               |         |        |       |                        |                      | PgSgFn / Pg Protein Intensity |         |                        |          |       |            |            |
|---------|--------------------------------------------------------------------------|---------|--------|-------|------------------------|----------------------|-------------------------------|---------|------------------------|----------|-------|------------|------------|
|         | PGN                                                                      | q-value | PgSgFn | Pg    | log <sub>2</sub> Ratio | log <sub>2</sub> Sum | Regulation                    | q-value | log <sub>2</sub> Ratio | PgSgFn   | Pg    |            |            |
| PG0248  | 0.751373                                                                 | 2.13    | 3      | -0.49 | 2.36                   | Y                    |                               |         | Y                      | 0.052108 | -1.73 | 66413      | 1196860    |
| PGN0350 | <i>translation initiation factor SUI1 putative</i>                       |         |        |       |                        |                      |                               |         |                        |          |       |            |            |
| PG0249  | 0.000393                                                                 | 431.81  | 346    | 0.32  | 9.6                    | R                    |                               |         | Y                      | 0.156645 | 0.01  | 365397275  | 361066398  |
| PGN0351 | <i>oxaloacetate decarboxylase putative</i>                               |         |        |       |                        |                      |                               |         |                        |          |       |            |            |
| PG0253  | 0.659176                                                                 | 2.13    | 7.5    | -1.82 | 3.27                   | Y                    |                               |         | G                      | 0.007211 | -4.60 | 66413      | 1668510.35 |
| PGN0353 | <i>conserved hypothetical protein</i>                                    |         |        |       |                        |                      |                               |         |                        |          |       |            |            |
| PG0254  | 0.202549                                                                 | 275.08  | 311.5  | -0.18 | 9.2                    | Y                    |                               |         | G                      | 0.000999 | -0.27 | 125841294  | 152033740  |
| PGN0354 | <i>N utilization substance protein A putative</i>                        |         |        |       |                        |                      |                               |         |                        |          |       |            |            |
| PG0255  | 0.031300                                                                 | 280.41  | 224    | 0.32  | 8.98                   | Y                    |                               |         | R                      | 0.001020 | 0.45  | 171819430  | 125959024  |
| PGN0355 | <i>infB translation initiation factor IF-2</i>                           |         |        |       |                        |                      |                               |         |                        |          |       |            |            |
| PG0257  | 0.372858                                                                 | 21.32   | 31     | -0.54 | 5.71                   | Y                    |                               |         | Y                      | 0.016480 | -1.03 | 5048640.5  | 9414955.73 |
| PGN0357 | <i>conserved hypothetical protein</i>                                    |         |        |       |                        |                      |                               |         |                        |          |       |            |            |
| PG0258  | 0.520799                                                                 | 59.71   | 46     | 0.38  | 6.72                   | Y                    |                               |         | R                      | 0.007705 | 0.52  | 36477010   | 25554325   |
| PGN0358 | <i>ABC transporter ATP-binding protein</i>                               |         |        |       |                        |                      |                               |         |                        |          |       |            |            |
| PG0259  | 0.510938                                                                 | 20.26   | 29     | -0.52 | 5.62                   | Y                    |                               |         | Y                      | 0.173433 | 0.09  | 19563312.5 | 19052965.9 |
| PGN0359 | <i>conserved hypothetical protein</i>                                    |         |        |       |                        |                      |                               |         |                        |          |       |            |            |
| PG0263  | 0.732133                                                                 | 169.52  | 159.5  | 0.09  | 8.36                   | Y                    |                               |         | Y                      | 0.031171 | -0.35 | 56240026.5 | 70758985.9 |
| PGN0360 | <i>tyrS tyrosyl-tRNA synthetase</i>                                      |         |        |       |                        |                      |                               |         |                        |          |       |            |            |
| PG0264  | 0.014598                                                                 | 2.13    | 16     | -2.91 | 4.18                   | Y                    |                               |         | G                      | 0.001595 | -5.69 | 66413      | 3424303.73 |
| PGN0361 | <i>glycosyl transferase group 2 family protein</i>                       |         |        |       |                        |                      |                               |         |                        |          |       |            |            |
| PG0267  | 0.595083                                                                 | 94.89   | 101.5  | -0.1  | 7.62                   | Y                    |                               |         | Y                      | 0.179184 | 0.01  | 41036160   | 40803439.1 |
| PGN0365 | <i>argS arginyl-tRNA synthetase</i>                                      |         |        |       |                        |                      |                               |         |                        |          |       |            |            |
| PG0268  | 0.475857                                                                 | 2.13    | 9.5    | -2.16 | 3.54                   | Y                    |                               |         | G                      | 0.000770 | -6.25 | 66413      | 5013729.9  |
| PGN0366 | <i>trmU tRNA (5-methylaminomethyl-2-thiouridylate)-methyltransferase</i> |         |        |       |                        |                      |                               |         |                        |          |       |            |            |
| PG0269  | 0.000001                                                                 | 2.13    | 27.5   | -3.69 | 4.89                   | Y                    |                               |         | G                      | 0.005239 | -8.04 | 66413      | 17958640.9 |
| PGN0367 | <i>xth exodeoxyribonuclease III</i>                                      |         |        |       |                        |                      |                               |         |                        |          |       |            |            |
| PG0270  | 0.773021                                                                 | 28.79   | 31.5   | -0.13 | 5.91                   | Y                    |                               |         | Y                      | 0.017656 | -0.32 | 13941564   | 17390804.5 |
| PGN0368 | <i>oxyR redox-sensitive transcriptional activator OxyR</i>               |         |        |       |                        |                      |                               |         |                        |          |       |            |            |
| PG0271  | 0.007630                                                                 | 2.13    | 17     | -3    | 4.26                   | Y                    |                               |         | G                      | 0.000107 | -7.57 | 66413      | 12531717.7 |
| PGN0369 | <i>ssb single-stranded binding protein</i>                               |         |        |       |                        |                      |                               |         |                        |          |       |            |            |
| PG0272  | 0.751373                                                                 | 2.13    | 3      | -0.49 | 2.36                   | Y                    |                               |         | Y                      | 0.052108 | -1.81 | 66413      | 1340150    |
| PGN0370 | <i>CBS domain protein</i>                                                |         |        |       |                        |                      |                               |         |                        |          |       |            |            |
| PG0275  | 0.339193                                                                 | 76.77   | 60     | 0.36  | 7.1                    | Y                    |                               |         | Y                      | 0.147498 | -0.07 | 64157505.5 | 67072061.1 |
| PGN0373 | <i>thioredoxin family protein</i>                                        |         |        |       |                        |                      |                               |         |                        |          |       |            |            |
| PG0276  | 0.134654                                                                 | 72.5    | 50     | 0.54  | 6.94                   | Y                    |                               |         | Y                      | 0.169545 | 0.01  | 30110824   | 29392377.5 |
| PGN0374 | <i>conserved hypothetical protein</i>                                    |         |        |       |                        |                      |                               |         |                        |          |       |            |            |
| PG1745  | 0.714916                                                                 | 56.51   | 58.5   | -0.05 | 6.85                   | Y                    |                               |         | Y                      | 0.032184 | -0.37 | 24199733   | 31228486.9 |
| PGN0375 | <i>phosphoribulokinase family protein</i>                                |         |        |       |                        |                      |                               |         |                        |          |       |            |            |
| PG1743  | 0.782623                                                                 | 26.65   | 27.5   | -0.05 | 5.76                   | Y                    |                               |         | Y                      | 0.033100 | -0.16 | 13701612   | 15293716.5 |
| PGN0376 | <i>kdsA 2-dehydro-3-deoxyphosphooctonate aldolase</i>                    |         |        |       |                        |                      |                               |         |                        |          |       |            |            |
| PG1741  | 0.355429                                                                 | 770.85  | 736.5  | 0.07  | 10.56                  | Y                    |                               |         | Y                      | 0.010105 | 0.32  | 487679373  | 393148538  |
| PGN0377 | <i>aspA aspartate ammonia-lyase</i>                                      |         |        |       |                        |                      |                               |         |                        |          |       |            |            |
| PG1739  | 0.751373                                                                 | 2.13    | 3      | -0.49 | 2.36                   | Y                    |                               |         | Y                      | 0.053629 | -1.23 | 66413      | 607109     |
| PGN0378 | <i>conserved domain protein</i>                                          |         |        |       |                        |                      |                               |         |                        |          |       |            |            |
| PG1731  | 0.307024                                                                 | 2.13    | 10.5   | -2.3  | 3.66                   | Y                    |                               |         | G                      | 0.001865 | -6.25 | 66413      | 5052757.43 |
| PGN0386 | <i>aroQ 3-dehydroquinone dehydratase type II</i>                         |         |        |       |                        |                      |                               |         |                        |          |       |            |            |
| PG1729  | 0.000001                                                                 | 505.37  | 432.5  | 0.22  | 9.87                   | R                    |                               |         | Y                      | 0.052108 | -0.17 | 439342561  | 498508443  |
| PGN0388 | <i>thiol peroxidase</i>                                                  |         |        |       |                        |                      |                               |         |                        |          |       |            |            |



| TIGR    | PgSgFn / Pg Spectral Count                                 |         |        |       |                        |                      | PgSgFn / Pg Protein Intensity |  |   |          |                        |            |            |
|---------|------------------------------------------------------------|---------|--------|-------|------------------------|----------------------|-------------------------------|--|---|----------|------------------------|------------|------------|
|         | PGN                                                        | q-value | PgSgFn | Pg    | log <sub>2</sub> Ratio | log <sub>2</sub> Sum | Regulation                    |  |   | q-value  | log <sub>2</sub> Ratio | PgSgFn     | Pg         |
| PG1728  | 0.400806                                                   | 2.13    | 5      | -1.23 | 2.83                   | Y                    |                               |  | Y | 0.052108 | -2.22                  | 66413      | 1790631.4  |
| PGN0389 | <i>cytidine/deoxycytidylate deaminase family protein</i>   |         |        |       |                        |                      |                               |  |   |          |                        |            |            |
| PG1727  | 0.751373                                                   | 2.13    | 7      | -1.72 | 3.19                   | Y                    |                               |  | Y | 0.022497 | -4.40                  | 66413      | 1699312.8  |
| PGN0390 | <i>yitL yitL protein</i>                                   |         |        |       |                        |                      |                               |  |   |          |                        |            |            |
| PG1726  | 0.000330                                                   | 57.57   | 100    | -0.8  | 7.3                    | G                    |                               |  | Y | 0.022350 | -0.75                  | 33518448   | 57551224.7 |
| PGN0391 | <i>PDZ domain protein</i>                                  |         |        |       |                        |                      |                               |  |   |          |                        |            |            |
| PG1724  | 0.285375                                                   | 8.53    | 9.5    | -0.16 | 4.17                   | Y                    |                               |  | Y | 0.046400 | -2.98                  | 1634421.5  | 3383904.6  |
| PGN0393 | <i>gcp O-sialoglycoprotein endopeptidase</i>               |         |        |       |                        |                      |                               |  |   |          |                        |            |            |
| PG1723  | 0.000000                                                   | 70.37   | 25.5   | 1.46  | 6.58                   | R                    |                               |  | R | 0.003776 | 1.87                   | 61475367   | 17022833.6 |
| PGN0394 | <i>rpsT ribosomal protein S20</i>                          |         |        |       |                        |                      |                               |  |   |          |                        |            |            |
| PG1721  | 0.773021                                                   | 65.04   | 57.5   | 0.18  | 6.94                   | Y                    |                               |  | Y | 0.052108 | -0.13                  | 35407828   | 38842936.7 |
| PGN0396 | <i>vacB ribonuclease R</i>                                 |         |        |       |                        |                      |                               |  |   |          |                        |            |            |
| PG1720  | 0.212556                                                   | 12.79   | 15     | -0.23 | 4.8                    | Y                    |                               |  | Y | 0.168269 | -2.80                  | 5951534.5  | 6708171.55 |
| PGN0397 | <i>conserved domain protein</i>                            |         |        |       |                        |                      |                               |  |   |          |                        |            |            |
| PG1719  | 0.033441                                                   | 14.93   | 22     | -0.56 | 5.21                   | Y                    |                               |  | Y | 0.150663 | -2.88                  | 5607170    | 6836670.45 |
| PGN0398 | <i>ABC transporter ATP-binding protein MsbA family</i>     |         |        |       |                        |                      |                               |  |   |          |                        |            |            |
| PG1715  | 0.543202                                                   | 33.05   | 31     | 0.09  | 6                      | Y                    |                               |  | Y | 0.018304 | -0.49                  | 8765318    | 12080743.5 |
| PGN0400 | <i>hypothetical protein PG_1715</i>                        |         |        |       |                        |                      |                               |  |   |          |                        |            |            |
| PG1714  | 0.712239                                                   | 65.04   | 54     | 0.27  | 6.9                    | Y                    |                               |  | Y | 0.062627 | 0.05                   | 39514633.5 | 38107400.7 |
| PGN0403 | <i>pdxH pyridoxamine-phosphate oxidase</i>                 |         |        |       |                        |                      |                               |  |   |          |                        |            |            |
| PG1712  | 0.045519                                                   | 14.93   | 20.5   | -0.46 | 5.15                   | Y                    |                               |  | Y | 0.071676 | -2.75                  | 2259090.5  | 4735819.1  |
| PGN0405 | <i>alpha-12-mannosidase family protein</i>                 |         |        |       |                        |                      |                               |  |   |          |                        |            |            |
| PG1711  | 0.000681                                                   | 9.6     | 28     | -1.54 | 5.23                   | G                    |                               |  | Y | 0.041452 | -3.91                  | 4886292    | 11532217   |
| PGN0406 | <i>alpha-12-mannosidase family protein</i>                 |         |        |       |                        |                      |                               |  |   |          |                        |            |            |
| PG1704  | 0.166597                                                   | 159.93  | 128.5  | 0.32  | 8.17                   | Y                    |                               |  | Y | 0.104719 | -0.07                  | 120806535  | 126382261  |
| PGN0411 | <i>thiol:disulfide interchange protein dsbD putative</i>   |         |        |       |                        |                      |                               |  |   |          |                        |            |            |
| PG1703  | 0.175055                                                   | 30.92   | 22     | 0.49  | 5.73                   | Y                    |                               |  | Y | 0.017556 | -0.51                  | 5925039    | 8383796.68 |
| PGN0412 | <i>MazG family protein</i>                                 |         |        |       |                        |                      |                               |  |   |          |                        |            |            |
| PG1702  | 0.000127                                                   | 184.45  | 229.5  | -0.32 | 8.69                   | G                    |                               |  | Y | 0.014936 | -0.43                  | 73716839   | 98285752.8 |
| PGN0413 | <i>gyrB DNA gyrase B subunit</i>                           |         |        |       |                        |                      |                               |  |   |          |                        |            |            |
| PG1701  | 0.370460                                                   | 60.77   | 53.5   | 0.18  | 6.84                   | Y                    |                               |  | Y | 0.023219 | -0.24                  | 13387001   | 15699725.8 |
| PGN0414 | <i>glutamine amidotransferase class II/dipeptidase</i>     |         |        |       |                        |                      |                               |  |   |          |                        |            |            |
| PG1697  | 0.000037                                                   | 24.52   | 55.5   | -1.18 | 6.32                   | G                    |                               |  | G | 0.002913 | -1.64                  | 9109170    | 26521350.9 |
| PGN0415 | <i>type II restriction endonuclease putative</i>           |         |        |       |                        |                      |                               |  |   |          |                        |            |            |
| PG1696  | 0.608229                                                   | 2.13    | 8.5    | -2    | 3.41                   | Y                    |                               |  | G | 0.002196 | -6.20                  | 66413      | 4892160.9  |
| PGN0416 | <i>type II DNA modification methyltransferase putative</i> |         |        |       |                        |                      |                               |  |   |          |                        |            |            |
| PG1694  | 0.507925                                                   | 2.13    | 4.5    | -1.08 | 2.73                   | Y                    |                               |  | Y | 0.052108 | -1.88                  | 66413      | 1121982.05 |
| PGN0418 | <i>conserved hypothetical protein</i>                      |         |        |       |                        |                      |                               |  |   |          |                        |            |            |
| PG1693  | 0.600049                                                   | 2.13    | 4      | -0.91 | 2.62                   | Y                    |                               |  | Y | 0.052108 | -2.27                  | 66413      | 2508020    |
| PGN0419 | <i>HesA/MoeB/ThiF family protein</i>                       |         |        |       |                        |                      |                               |  |   |          |                        |            |            |
| PG1692  | 0.000000                                                   | 2.13    | 35.5   | -4.06 | 5.23                   | Y                    |                               |  | G | 0.001742 | -6.58                  | 66413      | 6345381.9  |
| PGN0420 | <i>ABC transporter ATP-binding protein</i>                 |         |        |       |                        |                      |                               |  |   |          |                        |            |            |
| PG1690  | 0.779998                                                   | 2.13    | 6      | -1.49 | 3.02                   | Y                    |                               |  | G | 0.001987 | -5.76                  | 66413      | 3607578.98 |
| PGN0422 | <i>Sua5/YciO/YrdC/YwIC family protein</i>                  |         |        |       |                        |                      |                               |  |   |          |                        |            |            |
| PG1688  | 0.648995                                                   | 51.18   | 43     | 0.25  | 6.56                   | Y                    |                               |  | Y | 0.159862 | -0.01                  | 37705804   | 37936692.6 |
| PGN0423 | <i>greA transcription elongation factor GreA</i>           |         |        |       |                        |                      |                               |  |   |          |                        |            |            |
| PG1687  | 0.389823                                                   | 6.4     | 11.5   | -0.85 | 4.16                   | Y                    |                               |  | Y | 0.073058 | -4.31                  | 15318345.5 | 26371929.5 |
| PGN0424 | <i>HIT family protein</i>                                  |         |        |       |                        |                      |                               |  |   |          |                        |            |            |

| TIGR    | PgSgFn / Pg Spectral Count                                |         |        |       |                        |                      |            | PgSgFn / Pg Protein Intensity |                        |          |       |            |            |
|---------|-----------------------------------------------------------|---------|--------|-------|------------------------|----------------------|------------|-------------------------------|------------------------|----------|-------|------------|------------|
|         | PGN                                                       | q-value | PgSgFn | Pg    | log <sub>2</sub> Ratio | log <sub>2</sub> Sum | Regulation | q-value                       | log <sub>2</sub> Ratio | PgSgFn   | Pg    |            |            |
| PG1683  | 0.389823                                                  | 34.12   | 25.5   | 0.42  | 5.9                    | Y                    |            |                               | Y                      | 0.015803 | -0.62 | 7872712    | 11832455.9 |
| PGN0427 | <i>conserved hypothetical protein</i>                     |         |        |       |                        |                      |            |                               |                        |          |       |            |            |
| PG1682  | 0.201724                                                  | 2.13    | 11.5   | -2.43 | 3.77                   | Y                    |            |                               | G                      | 0.002914 | -6.77 | 66413      | 7286548.38 |
| PGN0428 | <i>glycosyl transferase group 1 family protein</i>        |         |        |       |                        |                      |            |                               |                        |          |       |            |            |
| PG1681  | 0.000000                                                  | 10.66   | 44.5   | -2.06 | 5.79                   | G                    |            |                               | G                      | 0.000770 | -5.13 | 859710     | 12375252.9 |
| PGN0429 | <i>glycogen debranching enzyme archaeal type putative</i> |         |        |       |                        |                      |            |                               |                        |          |       |            |            |
| PG1677  | 0.751373                                                  | 282.54  | 284    | -0.01 | 9.15                   | Y                    |            |                               | G                      | 0.003885 | -0.23 | 194743987  | 228993217  |
| PGN0433 | <i>pgk phosphoglycerate kinase</i>                        |         |        |       |                        |                      |            |                               |                        |          |       |            |            |
| PG1676  | 0.000000                                                  | 2906.43 | 3222.5 | -0.15 | 12.58                  | G                    |            |                               | Y                      | 0.077954 | 0.03  | 1.5752e+09 | 1.5422e+09 |
| PGN0434 | <i>pckA phosphoenolpyruvate carboxykinase (ATP)</i>       |         |        |       |                        |                      |            |                               |                        |          |       |            |            |
| PG1667  | 0.527466                                                  | 51.18   | 39     | 0.39  | 6.49                   | Y                    |            |                               | R                      | 0.007211 | 0.28  | 24155810.5 | 19825684.6 |
| PGN0444 | <i>outer membrane efflux protein</i>                      |         |        |       |                        |                      |            |                               |                        |          |       |            |            |
| PG1666  | 0.311506                                                  | 15.99   | 25     | -0.64 | 5.36                   | Y                    |            |                               | Y                      | 0.025723 | 0.21  | 8605191    | 7475370.78 |
| PGN0445 | <i>efflux transporter MFP component RND family</i>        |         |        |       |                        |                      |            |                               |                        |          |       |            |            |
| PG1665  | 0.751373                                                  | 2.13    | 3      | -0.49 | 2.36                   | Y                    |            |                               | Y                      | 0.052108 | -1.93 | 66413      | 1210753.5  |
| PGN0446 | <i>ABC transporter permease protein putative</i>          |         |        |       |                        |                      |            |                               |                        |          |       |            |            |
| PG1663  | 0.751373                                                  | 2.13    | 3      | -0.49 | 2.36                   | Y                    |            |                               | Y                      | 0.052192 | -1.50 | 66413      | 873910.5   |
| PGN0448 | <i>ABC transporter ATP-binding protein</i>                |         |        |       |                        |                      |            |                               |                        |          |       |            |            |
| PG1662  | 0.600049                                                  | 2.13    | 8.5    | -2    | 3.41                   | Y                    |            |                               | G                      | 0.000005 | -6.30 | 66413      | 5160553    |
| PGN0449 | <i>hypothetical protein PG_1662</i>                       |         |        |       |                        |                      |            |                               |                        |          |       |            |            |
| PG1657  | 0.055728                                                  | 108.75  | 141.5  | -0.38 | 7.97                   | Y                    |            |                               | Y                      | 0.012090 | -0.37 | 76707025   | 99041373.6 |
| PGN0456 | <i>mutB methylmalonyl-CoA mutase large subunit</i>        |         |        |       |                        |                      |            |                               |                        |          |       |            |            |
| PG1656  | 0.012371                                                  | 138.6   | 184.5  | -0.41 | 8.34                   | Y                    |            |                               | Y                      | 0.057584 | -0.31 | 93395525.5 | 113847141  |
| PGN0457 | <i>mutA methylmalonyl-CoA mutase small subunit</i>        |         |        |       |                        |                      |            |                               |                        |          |       |            |            |
| PG0222  | 0.784897                                                  | 2.13    | 2      | 0.09  | 2.05                   | Y                    |            |                               | Y                      | 0.052108 | -2.22 | 66413      | 2364117    |
| PGN0460 | <i>DNA-binding protein histone-like family</i>            |         |        |       |                        |                      |            |                               |                        |          |       |            |            |
| PG1653  | 0.002349                                                  | 47.98   | 82     | -0.77 | 7.02                   | G                    |            |                               | Y                      | 0.015803 | -0.50 | 23853297.5 | 33146311.1 |
| PGN0462 | <i>conserved hypothetical protein</i>                     |         |        |       |                        |                      |            |                               |                        |          |       |            |            |
| PG1652  | 0.005103                                                  | 61.84   | 96     | -0.63 | 7.3                    | G                    |            |                               | G                      | 0.001227 | -1.10 | 33394118.5 | 70856455.9 |
| PGN0463 | <i>hypothetical protein PG_1652</i>                       |         |        |       |                        |                      |            |                               |                        |          |       |            |            |
| PG1651  | 0.764248                                                  | 107.69  | 104.5  | 0.04  | 7.73                   | Y                    |            |                               | R                      | 0.004649 | 0.12  | 87018923   | 80196972.6 |
| PGN0464 | <i>TPR domain protein</i>                                 |         |        |       |                        |                      |            |                               |                        |          |       |            |            |
| PG1648  | 0.000071                                                  | 2.13    | 22.5   | -3.4  | 4.62                   | Y                    |            |                               | Y                      | 0.016268 | -7.13 | 66413      | 10611625.1 |
| PGN0465 | <i>RelA/SpoT family protein</i>                           |         |        |       |                        |                      |            |                               |                        |          |       |            |            |
| PG1647  | 0.050334                                                  | 2.13    | 14     | -2.72 | 4.01                   | Y                    |            |                               | G                      | 0.007285 | -4.35 | 66413      | 1409048.5  |
| PGN0466 | <i>cls cardiolipin synthetase</i>                         |         |        |       |                        |                      |            |                               |                        |          |       |            |            |
| PG1619  | 0.751373                                                  | 2.13    | 3      | -0.49 | 2.36                   | Y                    |            |                               | Y                      | 0.056585 | -1.00 | 66413      | 340454.75  |
| PGN0469 | <i>biotin synthesis protein BioC putative</i>             |         |        |       |                        |                      |            |                               |                        |          |       |            |            |
| PG1620  | 0.720026                                                  | 2.13    | 7      | -1.72 | 3.19                   | Y                    |            |                               | G                      | 0.004947 | -5.59 | 66413      | 3266146.03 |
| PGN0470 | <i>carboxyl-terminal protease-related protein</i>         |         |        |       |                        |                      |            |                               |                        |          |       |            |            |
| PG1622  | 0.272530                                                  | 23.46   | 36     | -0.62 | 5.89                   | Y                    |            |                               | Y                      | 0.126610 | -0.66 | 15635105.5 | 19636174.5 |
| PGN0472 | <i>DNA topoisomerase IV A subunit putative</i>            |         |        |       |                        |                      |            |                               |                        |          |       |            |            |
| PG1623  | 0.771913                                                  | 25.59   | 28     | -0.13 | 5.74                   | Y                    |            |                               | Y                      | 0.012494 | -0.65 | 18151385.5 | 28031541.9 |
| PGN0473 | <i>membrane bound regulatory protein putative</i>         |         |        |       |                        |                      |            |                               |                        |          |       |            |            |
| PG1625  | 0.000031                                                  | 2.13    | 23.5   | -3.46 | 4.68                   | Y                    |            |                               | G                      | 0.000226 | -5.91 | 66413      | 3945435.65 |
| PGN0476 | <i>hypothetical protein PG_1625</i>                       |         |        |       |                        |                      |            |                               |                        |          |       |            |            |
| PG1626  | 0.000000                                                  | 25.59   | 123    | -2.27 | 7.22                   | G                    |            |                               | Y                      | 0.010571 | -2.88 | 11511000.5 | 81134874.1 |
| PGN0477 | <i>hypothetical protein PG_1626</i>                       |         |        |       |                        |                      |            |                               |                        |          |       |            |            |



| TIGR    | PgSgFn / Pg Spectral Count                                |         |        |       |                        |                      |            | PgSgFn / Pg Protein Intensity |                        |          |       |            |            |
|---------|-----------------------------------------------------------|---------|--------|-------|------------------------|----------------------|------------|-------------------------------|------------------------|----------|-------|------------|------------|
|         | PGN                                                       | q-value | PgSgFn | Pg    | log <sub>2</sub> Ratio | log <sub>2</sub> Sum | Regulation | q-value                       | log <sub>2</sub> Ratio | PgSgFn   | Pg    |            |            |
| PG0234  | 0.000163                                                  | 38.38   | 21.5   | 0.84  | 5.9                    | R                    |            |                               | Y                      | 0.054253 | 0.47  | 3457803.5  | 2346171.73 |
| PGN0482 | <i>immunoreactive 23 kDa antigen PG66</i>                 |         |        |       |                        |                      |            |                               |                        |          |       |            |            |
| PG1632  | 0.000417                                                  | 18.13   | 44.5   | -1.3  | 5.97                   | G                    |            |                               | G                      | 0.000584 | -1.10 | 11102545.5 | 23752020.3 |
| PGN0483 | <i>galM aldose 1-epimerase</i>                            |         |        |       |                        |                      |            |                               |                        |          |       |            |            |
| PG1633  | 0.290677                                                  | 91.69   | 70     | 0.39  | 7.34                   | Y                    |            |                               | Y                      | 0.022021 | -0.40 | 59624448   | 78492841.7 |
| PGN0484 | <i>galK galactokinase</i>                                 |         |        |       |                        |                      |            |                               |                        |          |       |            |            |
| PG1635  | 0.779998                                                  | 2.13    | 2.5    | -0.23 | 2.21                   | Y                    |            |                               | Y                      | 0.052485 | -1.58 | 66413      | 744479.025 |
| PGN0486 | <i>hypothetical protein PG_1635</i>                       |         |        |       |                        |                      |            |                               |                        |          |       |            |            |
| PG1636  | 0.002655                                                  | 35.18   | 60.5   | -0.78 | 6.58                   | G                    |            |                               | Y                      | 0.091569 | -0.82 | 36438452.5 | 49654214.7 |
| PGN0487 | <i>FtsK/SpoIIIE family protein</i>                        |         |        |       |                        |                      |            |                               |                        |          |       |            |            |
| PG1638  | 0.308129                                                  | 7.46    | 15     | -1.01 | 4.49                   | Y                    |            |                               | Y                      | 0.085610 | -2.90 | 3319775.5  | 5590282.4  |
| PGN0488 | <i>thioredoxin family protein</i>                         |         |        |       |                        |                      |            |                               |                        |          |       |            |            |
| PG1641  | 0.758093                                                  | 2.13    | 6.5    | -1.61 | 3.11                   | Y                    |            |                               | G                      | 0.003861 | -4.93 | 66413      | 2048710.73 |
| PGN0491 | <i>phosphotyrosine protein phosphatase</i>                |         |        |       |                        |                      |            |                               |                        |          |       |            |            |
| PG1615  | 0.021850                                                  | 272.94  | 224.5  | 0.28  | 8.96                   | Y                    |            |                               | Y                      | 0.073058 | 0.07  | 238750682  | 227540541  |
| PGN0497 | <i>frdA fumarate reductase flavoprotein subunit</i>       |         |        |       |                        |                      |            |                               |                        |          |       |            |            |
| PG1614  | 0.269016                                                  | 21.32   | 13     | 0.71  | 5.1                    | Y                    |            |                               | G                      | 0.006371 | -1.97 | 2327145    | 7439696.6  |
| PGN0498 | <i>frdB fumarate reductase iron-sulfur protein</i>        |         |        |       |                        |                      |            |                               |                        |          |       |            |            |
| PG1613  | 0.273687                                                  | 94.89   | 119.5  | -0.33 | 7.74                   | Y                    |            |                               | Y                      | 0.015803 | -0.33 | 72823294   | 92005493.9 |
| PGN0499 | <i>glyoxalase family protein</i>                          |         |        |       |                        |                      |            |                               |                        |          |       |            |            |
| PG1612  | 0.000044                                                  | 597.07  | 667    | -0.16 | 10.3                   | G                    |            |                               | Y                      | 0.128525 | 0.09  | 729823893  | 685208281  |
| PGN0500 | <i>mmdA methylmalonyl-CoA decarboxylase alpha subunit</i> |         |        |       |                        |                      |            |                               |                        |          |       |            |            |
| PG1611  | 0.006149                                                  | 88.49   | 94     | -0.09 | 7.51                   | G                    |            |                               | R                      | 0.004851 | 0.63  | 71767009.5 | 46955364.3 |
| PGN0501 | <i>hypothetical protein PG_1611</i>                       |         |        |       |                        |                      |            |                               |                        |          |       |            |            |
| PG1609  | 0.000000                                                  | 242.02  | 363.5  | -0.59 | 9.24                   | G                    |            |                               | Y                      | 0.087922 | -0.21 | 80854557.5 | 91352569.9 |
| PGN0503 | <i>mmdC methylmalonyl-CoA decarboxylase gamma subunit</i> |         |        |       |                        |                      |            |                               |                        |          |       |            |            |
| PG1608  | 0.176852                                                  | 8.53    | 7.5    | 0.19  | 4                      | Y                    |            |                               | Y                      | 0.052108 | -3.50 | 2640709.5  | 7280641.88 |
| PGN0504 | <i>mmdB methylmalonyl-CoA decarboxylase beta subunit</i>  |         |        |       |                        |                      |            |                               |                        |          |       |            |            |
| PG1605  | 0.363945                                                  | 165.26  | 137.5  | 0.27  | 8.24                   | Y                    |            |                               | Y                      | 0.156645 | -0.02 | 202259930  | 204994489  |
| PGN0508 | <i>pepC aminopeptidase C</i>                              |         |        |       |                        |                      |            |                               |                        |          |       |            |            |
| PG1604  | 0.347604                                                  | 28.79   | 40     | -0.47 | 6.1                    | Y                    |            |                               | G                      | 0.007923 | -0.68 | 14754286.5 | 23455749.4 |
| PGN0509 | <i>immunoreactive 84 kDa antigen PG93</i>                 |         |        |       |                        |                      |            |                               |                        |          |       |            |            |
| PG1603  | 0.751373                                                  | 45.85   | 41.5   | 0.14  | 6.45                   | Y                    |            |                               | Y                      | 0.140843 | -0.01 | 25840992.5 | 26047181.9 |
| PGN0510 | <i>HAM1 protein</i>                                       |         |        |       |                        |                      |            |                               |                        |          |       |            |            |
| PG1602  | 0.482754                                                  | 19.19   | 11.5   | 0.74  | 4.94                   | Y                    |            |                               | Y                      | 0.027355 | -1.55 | 1426523    | 4681957.95 |
| PGN0511 | <i>conserved hypothetical protein</i>                     |         |        |       |                        |                      |            |                               |                        |          |       |            |            |
| PG1597  | 0.188231                                                  | 11.73   | 16     | -0.45 | 4.79                   | Y                    |            |                               | Y                      | 0.100194 | -3.59 | 9843864.5  | 14886068.8 |
| PGN0516 | <i>DnaK suppressor protein putative</i>                   |         |        |       |                        |                      |            |                               |                        |          |       |            |            |
| PG1596  | 0.001627                                                  | 232.43  | 305    | -0.39 | 9.07                   | G                    |            |                               | G                      | 0.006115 | -0.33 | 105529295  | 132698183  |
| PGN0517 | <i>isoleucyl-tRNA synthetase putative</i>                 |         |        |       |                        |                      |            |                               |                        |          |       |            |            |
| PG1595  | 0.000000                                                  | 2.13    | 54.5   | -4.68 | 5.82                   | Y                    |            |                               | G                      | 0.000007 | -7.23 | 66413      | 9863722.58 |
| PGN0518 | <i>rpe ribulose-phosphate 3-epimerase</i>                 |         |        |       |                        |                      |            |                               |                        |          |       |            |            |
| PG1592  | 0.069053                                                  | 40.52   | 62.5   | -0.63 | 6.69                   | Y                    |            |                               | G                      | 0.009001 | -0.63 | 10596692.5 | 16117967.9 |
| PGN0521 | <i>HDIG domain protein</i>                                |         |        |       |                        |                      |            |                               |                        |          |       |            |            |
| PG1589  | 0.000575                                                  | 9.6     | 29     | -1.59 | 5.27                   | G                    |            |                               | Y                      | 0.037877 | -3.77 | 3150847    | 10839301.4 |
| PGN0522 | <i>folP dihydropteroate synthase</i>                      |         |        |       |                        |                      |            |                               |                        |          |       |            |            |
| PG1588  | 0.751373                                                  | 2.13    | 3      | -0.49 | 2.36                   | Y                    |            |                               | Y                      | 0.052108 | -2.13 | 66413      | 1581429.98 |
| PGN0523 | <i>conserved hypothetical protein</i>                     |         |        |       |                        |                      |            |                               |                        |          |       |            |            |

| TIGR    | PgSgFn / Pg Spectral Count                                   |         |        |       |                        |                      |                                                                                                                                                                          | PgSgFn / Pg Protein Intensity |                        |        |            |            |
|---------|--------------------------------------------------------------|---------|--------|-------|------------------------|----------------------|--------------------------------------------------------------------------------------------------------------------------------------------------------------------------|-------------------------------|------------------------|--------|------------|------------|
|         | PGN                                                          | q-value | PgSgFn | Pg    | log <sub>2</sub> Ratio | log <sub>2</sub> Sum | Regulation                                                                                                                                                               | q-value                       | log <sub>2</sub> Ratio | PgSgFn | Pg         |            |
| PG1587  | 0.725943                                                     | 2.13    | 7      | -1.72 | 3.19                   | Y                    |       | G                             | 0.003160               | -4.63  | 66413      | 1657821.78 |
| PGN0524 | <i>PAP2 superfamily protein</i>                              |         |        |       |                        |                      |                                                                                                                                                                          |                               |                        |        |            |            |
| PG1586  | 0.516095                                                     | 9.6     | 9      | 0.09  | 4.22                   | Y                    |       | Y                             | 0.161524               | -2.80  | 5476541    | 6367358.58 |
| PGN0525 | <i>batE batE protein</i>                                     |         |        |       |                        |                      |                                                                                                                                                                          |                               |                        |        |            |            |
| PG1585  | 0.786857                                                     | 29.85   | 29     | 0.04  | 5.88                   | Y                    |       | Y                             | 0.087085               | -0.11  | 14633014   | 15713343.7 |
| PGN0526 | <i>batD batD protein</i>                                     |         |        |       |                        |                      |                                                                                                                                                                          |                               |                        |        |            |            |
| PG1584  | 0.115710                                                     | 21.32   | 11.5   | 0.89  | 5.04                   | Y                    |       | Y                             | 0.053020               | 0.82   | 7081698.5  | 3284526.6  |
| PGN0527 | <i>batC batC protein</i>                                     |         |        |       |                        |                      |                                                                                                                                                                          |                               |                        |        |            |            |
| PG1583  | 0.634798                                                     | 2.13    | 8      | -1.91 | 3.34                   | Y                    |       | G                             | 0.004244               | -5.71  | 66413      | 3540492.28 |
| PGN0528 | <i>batB batB protein</i>                                     |         |        |       |                        |                      |                                                                                                                                                                          |                               |                        |        |            |            |
| PG1582  | 0.240620                                                     | 2.13    | 11     | -2.37 | 3.71                   | Y                    |       | G                             | 0.001091               | -5.44  | 66413      | 2876662.53 |
| PGN0529 | <i>batA batA protein</i>                                     |         |        |       |                        |                      |                                                                                                                                                                          |                               |                        |        |            |            |
| PG1581  | 0.056380                                                     | 15.99   | 19     | -0.25 | 5.13                   | Y                    |       | Y                             | 0.053020               | -3.63  | 6272231    | 12060820.1 |
| PGN0530 | <i>hypothetical protein PG_1581</i>                          |         |        |       |                        |                      |                                                                                                                                                                          |                               |                        |        |            |            |
| PG1580  | 0.000233                                                     | 19.19   | 29     | -0.6  | 5.59                   | G                    |       | Y                             | 0.128525               | -3.10  | 4708185    | 6258223.2  |
| PGN0531 | <i>conserved hypothetical protein</i>                        |         |        |       |                        |                      |                                                                                                                                                                          |                               |                        |        |            |            |
| PG1579  | 0.687551                                                     | 74.63   | 68.5   | 0.12  | 7.16                   | Y                    |       | Y                             | 0.066072               | -0.31  | 46777684.5 | 59949389.7 |
| PGN0532 | <i>ATPase MoxR family</i>                                    |         |        |       |                        |                      |                                                                                                                                                                          |                               |                        |        |            |            |
| PG1578  | 0.000000                                                     | 10.66   | 45.5   | -2.09 | 5.81                   | G                    |       | G                             | 0.005281               | -4.35  | 2256621.5  | 11958740.7 |
| PGN0533 | <i>nadA quinolinate synthetase complex subunit A</i>         |         |        |       |                        |                      |                                                                                                                                                                          |                               |                        |        |            |            |
| PG1577  | 0.024693                                                     | 2.13    | 15     | -2.82 | 4.1                    | Y                    |       | Y                             | 0.020209               | -8.50  | 66413      | 28797934.7 |
| PGN0534 | <i>nadC nicotinate-nucleotide pyrophosphorylase</i>          |         |        |       |                        |                      |                                                                                                                                                                          |                               |                        |        |            |            |
| PG1576  | 0.125058                                                     | 2.13    | 12.5   | -2.55 | 3.87                   | Y                    |   | G                             | 0.004413               | -6.47  | 66413      | 5985868.28 |
| PGN0535 | <i>nadB L-aspartate oxidase</i>                              |         |        |       |                        |                      |                                                                                                                                                                          |                               |                        |        |            |            |
| PG1573  | 0.126258                                                     | 6.4     | 4.5    | 0.51  | 3.45                   | Y                    |   | Y                             | 0.089345               | 1.22   | 1808844.5  | 719518.85  |
| PGN0537 | <i>transcriptional regulator Crp family</i>                  |         |        |       |                        |                      |                                                                                                                                                                          |                               |                        |        |            |            |
| PG1571  | 0.751373                                                     | 2.13    | 3      | -0.49 | 2.36                   | Y                    |   | Y                             | 0.053020               | -1.30  | 66413      | 662766     |
| PGN0539 | <i>metallo-beta-lactamase superfamily protein</i>            |         |        |       |                        |                      |                                                                                                                                                                          |                               |                        |        |            |            |
| PG1566  | 0.751373                                                     | 92.76   | 100.5  | -0.12 | 7.59                   | Y                    |   | Y                             | 0.025545               | -0.09  | 52939061.5 | 56159760.3 |
| PGN0543 | <i>gltX glutamyl-tRNA synthetase</i>                         |         |        |       |                        |                      |                                                                                                                                                                          |                               |                        |        |            |            |
| PG1565  | 0.004789                                                     | 2.13    | 17     | -3    | 4.26                   | Y                    |   | Y                             | 0.010571               | -5.68  | 66413      | 3658479    |
| PGN0544 | <i>3-deoxy-D-manno-octulosonic-acid transferase putative</i> |         |        |       |                        |                      |                                                                                                                                                                          |                               |                        |        |            |            |
| PG1564  | 0.658227                                                     | 2.13    | 7.5    | -1.82 | 3.27                   | Y                    |   | Y                             | 0.030979               | -3.95  | 66413      | 1397470    |
| PGN0545 | <i>membrane protein putative</i>                             |         |        |       |                        |                      |                                                                                                                                                                          |                               |                        |        |            |            |
| PG1563  | 0.629057                                                     | 67.17   | 58     | 0.21  | 6.97                   | Y                    |   | Y                             | 0.013957               | 0.25   | 33800921.5 | 28588421.9 |
| PGN0546 | <i>rfaA glucose-1-phosphate thymidyltransferase</i>          |         |        |       |                        |                      |                                                                                                                                                                          |                               |                        |        |            |            |
| PG1562  | 0.751373                                                     | 20.26   | 24     | -0.24 | 5.47                   | Y                    |   | G                             | 0.009495               | -0.49  | 7114888    | 9942694    |
| PGN0547 | <i>rfaC dTDP-4-dehydrorhamnose 35-epimerase</i>              |         |        |       |                        |                      |                                                                                                                                                                          |                               |                        |        |            |            |
| PG1561  | 0.000436                                                     | 8.53    | 28.5   | -1.74 | 5.21                   | G                    |   | Y                             | 0.029520               | -3.58  | 2753764    | 6703881.65 |
| PGN0548 | <i>rfaD dTDP-4-dehydrorhamnose reductase</i>                 |         |        |       |                        |                      |                                                                                                                                                                          |                               |                        |        |            |            |
| PG1560  | 0.420012                                                     | 37.32   | 39     | -0.06 | 6.25                   | Y                    |   | Y                             | 0.068558               | 0.43   | 23472072.5 | 16353768.7 |
| PGN0549 | <i>rfaB dTDP-glucose 46-dehydratase</i>                      |         |        |       |                        |                      |                                                                                                                                                                          |                               |                        |        |            |            |
| PG1559  | 0.074667                                                     | 303.86  | 312.5  | -0.04 | 9.27                   | Y                    |   | Y                             | 0.052485               | 0.09   | 267532608  | 252362979  |
| PGN0550 | <i>gcvT glycine cleavage system T protein</i>                |         |        |       |                        |                      |                                                                                                                                                                          |                               |                        |        |            |            |
| PG1555  | 0.600536                                                     | 37.32   | 48     | -0.36 | 6.41                   | Y                    |   | Y                             | 0.119527               | 0.08   | 16867974   | 15834185.9 |
| PGN0554 | <i>conserved domain protein</i>                              |         |        |       |                        |                      |                                                                                                                                                                          |                               |                        |        |            |            |
| PG1553  | 0.102044                                                     | 1357.26 | 1265   | 0.1   | 11.36                  | Y                    |   | Y                             | 0.027084               | -0.03  | 980922612  | 1.001e+09  |
| PGN0556 | <i>CobN/magnesium chelatase family protein</i>               |         |        |       |                        |                      |                                                                                                                                                                          |                               |                        |        |            |            |

| TIGR    | PgSgFn / Pg Spectral Count                                                       |         |       |                        |                      |            |         | PgSgFn / Pg Protein Intensity |        |          |       |            |            |
|---------|----------------------------------------------------------------------------------|---------|-------|------------------------|----------------------|------------|---------|-------------------------------|--------|----------|-------|------------|------------|
|         | q-value                                                                          | PgSgFn  | Pg    | log <sub>2</sub> Ratio | log <sub>2</sub> Sum | Regulation | q-value | log <sub>2</sub> Ratio        | PgSgFn | Pg       |       |            |            |
| PG1552  | 0.001746                                                                         | 1265.57 | 1207  | 0.07                   | 11.27                | R          |         |                               | Y      | 0.013354 | 0.20  | 424713377  | 368717694  |
| PGN0557 | <i>hmuR TonB-dependent receptor HmuR</i>                                         |         |       |                        |                      |            |         |                               |        |          |       |            |            |
| PG1551  | 0.000000                                                                         | 967.03  | 732   | 0.4                    | 10.73                | R          |         |                               | R      | 0.003103 | 0.46  | 1.245e+09  | 903273515  |
| PGN0558 | <i>hmuY hmuY protein</i>                                                         |         |       |                        |                      |            |         |                               |        |          |       |            |            |
| PG1545  | 0.017292                                                                         | 445.67  | 388   | 0.2                    | 9.7                  | Y          |         |                               | Y      | 0.062174 | -0.24 | 347181838  | 417426758  |
| PGN0564 | <i>sodB superoxide dismutase Fe-Mn</i>                                           |         |       |                        |                      |            |         |                               |        |          |       |            |            |
| PG1543  | 0.700541                                                                         | 20.26   | 24.5  | -0.27                  | 5.48                 | Y          |         |                               | G      | 0.003026 | -1.30 | 8223660    | 19587604   |
| PGN0566 | <i>thioesterase family protein</i>                                               |         |       |                        |                      |            |         |                               |        |          |       |            |            |
| PG1542  | 0.403113                                                                         | 2.13    | 10    | -2.23                  | 3.6                  | Y          |         |                               | Y      | 0.011148 | -6.08 | 66413      | 4836386    |
| PGN0567 | <i>prtC collagenase</i>                                                          |         |       |                        |                      |            |         |                               |        |          |       |            |            |
| PG1541  | 0.751373                                                                         | 2.13    | 3     | -0.49                  | 2.36                 | Y          |         |                               | Y      | 0.052147 | -1.74 | 66413      | 926555.925 |
| PGN0568 | <i>folk 2-amino-4-hydroxy-6-hydroxymethylidihydropteridine pyrophosphokinase</i> |         |       |                        |                      |            |         |                               |        |          |       |            |            |
| PG1540  | 0.000397                                                                         | 66.1    | 110   | -0.73                  | 7.46                 | G          |         |                               | G      | 0.002914 | -0.47 | 48861317.5 | 67693048.6 |
| PGN0569 | <i>queA S-adenosylmethionine:tRNA ribosyltransferase-isomerase</i>               |         |       |                        |                      |            |         |                               |        |          |       |            |            |
| PG1536  | 0.345160                                                                         | 2.13    | 10    | -2.23                  | 3.6                  | Y          |         |                               | Y      | 0.014040 | -6.01 | 66413      | 4732513.58 |
| PGN0573 | <i>cell division protein FtsX putative</i>                                       |         |       |                        |                      |            |         |                               |        |          |       |            |            |
| PG1490  | 0.001057                                                                         | 8.53    | 1     | 3.09                   | 3.25                 | Y          |         |                               | Y      | 0.051674 | 4.85  | 3875045    | 23108.5    |
| PGN0579 | <i>TraG family protein</i>                                                       |         |       |                        |                      |            |         |                               |        |          |       |            |            |
| PG1495  | 0.692989                                                                         | 2.13    | 3.5   | -0.72                  | 2.49                 | Y          |         |                               | Y      | 0.052108 | -1.99 | 66413      | 1318925.08 |
| PGN0582 | <i>topB-2 DNA topoisomerase III</i>                                              |         |       |                        |                      |            |         |                               |        |          |       |            |            |
| PG1479  | 0.751373                                                                         | 2.13    | 3     | -0.49                  | 2.36                 | Y          |         |                               | Y      | 0.056249 | -1.02 | 66413      | 352780.05  |
| PGN0598 | <i>conjugative transposon protein TraJ</i>                                       |         |       |                        |                      |            |         |                               |        |          |       |            |            |
| PG1286  | 0.000000                                                                         | 776.19  | 1130  | -0.54                  | 10.9                 | G          |         |                               | G      | 0.005850 | -0.66 | 786745187  | 1.2428e+09 |
| PGN0604 | <i>ftn ferritin</i>                                                              |         |       |                        |                      |            |         |                               |        |          |       |            |            |
| PG1285  | 0.000000                                                                         | 2.13    | 36.5  | -4.1                   | 5.27                 | Y          |         |                               | G      | 0.000107 | -7.50 | 66413      | 11871032.9 |
| PGN0606 | <i>glucosamine-6-phosphate isomerase putative</i>                                |         |       |                        |                      |            |         |                               |        |          |       |            |            |
| PG1283  | 0.002971                                                                         | 347.58  | 420.5 | -0.27                  | 9.59                 | G          |         |                               | Y      | 0.014040 | -0.13 | 239731394  | 261770555  |
| PGN0607 | <i>conserved hypothetical protein</i>                                            |         |       |                        |                      |            |         |                               |        |          |       |            |            |
| PG1281  | 0.000443                                                                         | 2.13    | 19.5  | -3.19                  | 4.43                 | Y          |         |                               | G      | 0.007727 | -7.25 | 66413      | 10598825.2 |
| PGN0609 | <i>hypothetical protein PG_1281</i>                                              |         |       |                        |                      |            |         |                               |        |          |       |            |            |
| PG1280  | 0.000381                                                                         | 358.24  | 311.5 | 0.2                    | 9.39                 | R          |         |                               | Y      | 0.053939 | 0.08  | 335988443  | 318399293  |
| PGN0610 | <i>conserved hypothetical protein</i>                                            |         |       |                        |                      |            |         |                               |        |          |       |            |            |
| PG1279  | 0.000000                                                                         | 670.63  | 985   | -0.55                  | 10.69                | G          |         |                               | Y      | 0.052108 | 0.28  | 432354674  | 351186442  |
| PGN0611 | <i>D-isomer specific 2-hydroxyacid dehydrogenase family protein</i>              |         |       |                        |                      |            |         |                               |        |          |       |            |            |
| PG1278  | 0.004530                                                                         | 2014.03 | 2113  | -0.07                  | 12.01                | G          |         |                               | Y      | 0.022021 | -0.08 | 1.8822e+09 | 1.9891e+09 |
| PGN0612 | <i>serC phosphoserine aminotransferase</i>                                       |         |       |                        |                      |            |         |                               |        |          |       |            |            |
| PG1277  | 0.751373                                                                         | 28.79   | 34    | -0.24                  | 5.97                 | Y          |         |                               | Y      | 0.013080 | -0.60 | 16515024.5 | 25291205.8 |
| PGN0613 | <i>UDP-glucose-6 dehydrogenase putative</i>                                      |         |       |                        |                      |            |         |                               |        |          |       |            |            |
| PG0571  | 0.659176                                                                         | 90.63   | 96    | -0.08                  | 7.54                 | Y          |         |                               | Y      | 0.032546 | -0.84 | 30578894.5 | 58679955.7 |
| PGN0618 | <i>asd aspartate-semialdehyde dehydrogenase</i>                                  |         |       |                        |                      |            |         |                               |        |          |       |            |            |
| PG0573  | 0.475857                                                                         | 2.13    | 9     | -2.08                  | 3.48                 | Y          |         |                               | G      | 0.005000 | -5.43 | 66413      | 2937574.18 |
| PGN0620 | <i>mraW S-adenosyl-methyltransferase MraW</i>                                    |         |       |                        |                      |            |         |                               |        |          |       |            |            |
| PG0575  | 0.358444                                                                         | 26.65   | 17    | 0.65                   | 5.45                 | Y          |         |                               | Y      | 0.012690 | 1.25  | 7338382    | 3019542    |
| PGN0622 | <i>penicillin-binding protein 2 putative</i>                                     |         |       |                        |                      |            |         |                               |        |          |       |            |            |
| PG0576  | 0.410849                                                                         | 27.72   | 39    | -0.49                  | 6.06                 | Y          |         |                               | G      | 0.001876 | -1.31 | 8683356.5  | 21487545.4 |
| PGN0623 | <i>murE UDP-N-acetylmuramoylalanyl-D-glutamyl-2 6-diaminopimelate ligase</i>     |         |       |                        |                      |            |         |                               |        |          |       |            |            |
| PG0578  | 0.000000                                                                         | 2.13    | 38.5  | -4.18                  | 5.34                 | Y          |         |                               | G      | 0.003294 | -7.60 | 66413      | 13041684.5 |
| PGN0625 | <i>murD UDP-N-acetylmuramoylalanine--D-glutamate ligase</i>                      |         |       |                        |                      |            |         |                               |        |          |       |            |            |

| TIGR    | PgSgFn / Pg Spectral Count                                                                                                      |          |        |       |                        |                      | PgSgFn / Pg Protein Intensity |  |  |         |                        |        |            |            |
|---------|---------------------------------------------------------------------------------------------------------------------------------|----------|--------|-------|------------------------|----------------------|-------------------------------|--|--|---------|------------------------|--------|------------|------------|
|         | PGN                                                                                                                             | q-value  | PgSgFn | Pg    | log <sub>2</sub> Ratio | log <sub>2</sub> Sum | Regulation                    |  |  | q-value | log <sub>2</sub> Ratio | PgSgFn | Pg         |            |
| PG0580  |                                                                                                                                 | 0.035356 | 13.86  | 22    | -0.67                  | 5.16                 | Y                             |  |  | Y       | 0.094935               | -3.02  | 4265870.5  | 6526242.05 |
| PGN0627 | <i>murG UDP-N-acetylglucosamine--N-acetylmuramyl-(pentapeptide) pyrophosphoryl-undecaprenol N-acetylglucosamine transferase</i> |          |        |       |                        |                      |                               |  |  |         |                        |        |            |            |
| PG0581  |                                                                                                                                 | 0.003644 | 2.13   | 17.5  | -3.04                  | 4.29                 | Y                             |  |  | Y       | 0.017881               | -6.55  | 66413      | 7217321.95 |
| PGN0628 | <i>murC UDP-N-acetylmuramate--alanine ligase</i>                                                                                |          |        |       |                        |                      |                               |  |  |         |                        |        |            |            |
| PG0583  |                                                                                                                                 | 0.292751 | 102.35 | 85.5  | 0.26                   | 7.55                 | Y                             |  |  | Y       | 0.042501               | -0.11  | 37054351.5 | 40087110.8 |
| PGN0630 | <i>ftsA cell division protein FtsA</i>                                                                                          |          |        |       |                        |                      |                               |  |  |         |                        |        |            |            |
| PG0584  |                                                                                                                                 | 0.025621 | 38.38  | 63    | -0.71                  | 6.66                 | Y                             |  |  | Y       | 0.015691               | -0.87  | 17416508   | 32654111.4 |
| PGN0631 | <i>ftsZ cell division protein FtsZ</i>                                                                                          |          |        |       |                        |                      |                               |  |  |         |                        |        |            |            |
| PG0585  |                                                                                                                                 | 0.013991 | 73.57  | 107   | -0.54                  | 7.5                  | Y                             |  |  | Y       | 0.040104               | -0.26  | 42628927   | 50449284.2 |
| PGN0632 | <i>YqeY family protein</i>                                                                                                      |          |        |       |                        |                      |                               |  |  |         |                        |        |            |            |
| PG0588  |                                                                                                                                 | 0.771913 | 26.65  | 21.5  | 0.31                   | 5.59                 | Y                             |  |  | R       | 0.006488               | 0.92   | 15516357   | 8254904.85 |
| PGN0634 | <i>panB 3-methyl-2-oxobutanoate hydroxymethyltransferase</i>                                                                    |          |        |       |                        |                      |                               |  |  |         |                        |        |            |            |
| PG0589  |                                                                                                                                 | 0.243063 | 237.76 | 237   | 0                      | 8.89                 | Y                             |  |  | G       | 0.004627               | -0.48  | 68840319   | 95976917.1 |
| PGN0635 | <i>guaA GMP synthase</i>                                                                                                        |          |        |       |                        |                      |                               |  |  |         |                        |        |            |            |
| PG0592  |                                                                                                                                 | 0.029864 | 54.38  | 31    | 0.81                   | 6.42                 | Y                             |  |  | R       | 0.003852               | 0.73   | 96046289.5 | 57907274.2 |
| PGN0636 | <i>rpmE ribosomal protein L31</i>                                                                                               |          |        |       |                        |                      |                               |  |  |         |                        |        |            |            |
| PG0593  |                                                                                                                                 | 0.397614 | 66.1   | 78.5  | -0.25                  | 7.18                 | Y                             |  |  | Y       | 0.054253               | -0.26  | 52547106.5 | 64193890.8 |
| PGN0637 | <i>htrA htrA protein</i>                                                                                                        |          |        |       |                        |                      |                               |  |  |         |                        |        |            |            |
| PG0594  |                                                                                                                                 | 0.779998 | 30.92  | 33.5  | -0.12                  | 6.01                 | Y                             |  |  | Y       | 0.192818               | -0.09  | 13712523.5 | 13671002.5 |
| PGN0638 | <i>rpoD RNA polymerase sigma-70 factor</i>                                                                                      |          |        |       |                        |                      |                               |  |  |         |                        |        |            |            |
| PG0595  |                                                                                                                                 | 0.548692 | 127.94 | 139   | -0.12                  | 8.06                 | Y                             |  |  | Y       | 0.017665               | 0.27   | 86262499.5 | 71388445.7 |
| PGN0639 | <i>rpsF ribosomal protein S6</i>                                                                                                |          |        |       |                        |                      |                               |  |  |         |                        |        |            |            |
| PG0596  |                                                                                                                                 | 0.012939 | 30.92  | 55    | -0.83                  | 6.42                 | Y                             |  |  | G       | 0.007304               | -0.70  | 39007766.5 | 62980873.3 |
| PGN0640 | <i>rpsR ribosomal protein S18</i>                                                                                               |          |        |       |                        |                      |                               |  |  |         |                        |        |            |            |
| PG0597  |                                                                                                                                 | 0.007997 | 105.55 | 73.5  | 0.52                   | 7.48                 | R                             |  |  | Y       | 0.017839               | 0.22   | 91919371.5 | 78995957.6 |
| PGN0641 | <i>rplI ribosomal protein L9</i>                                                                                                |          |        |       |                        |                      |                               |  |  |         |                        |        |            |            |
| PG0599  |                                                                                                                                 | 0.089835 | 218.57 | 220   | -0.01                  | 8.78                 | Y                             |  |  | Y       | 0.030979               | -0.29  | 124759660  | 153182621  |
| PGN0643 | <i>ribBA 34-dihydroxy-2-butanone 4-phosphate synthase/GTP cyclohydrolase II</i>                                                 |          |        |       |                        |                      |                               |  |  |         |                        |        |            |            |
| PG0602  |                                                                                                                                 | 0.357051 | 30.92  | 44    | -0.51                  | 6.23                 | Y                             |  |  | G       | 0.002260               | -0.98  | 14555603   | 28601247   |
| PGN0645 | <i>hypothetical protein PG_0602</i>                                                                                             |          |        |       |                        |                      |                               |  |  |         |                        |        |            |            |
| PG0603  |                                                                                                                                 | 0.035356 | 2.13   | 14.5  | -2.77                  | 4.06                 | Y                             |  |  | G       | 0.005259               | -6.82  | 66413      | 7723477.7  |
| PGN0646 | <i>cmk cytidylate kinase</i>                                                                                                    |          |        |       |                        |                      |                               |  |  |         |                        |        |            |            |
| PG0611  |                                                                                                                                 | 0.021557 | 35.18  | 17    | 1.05                   | 5.71                 | Y                             |  |  | Y       | 0.090791               | -0.15  | 30136616   | 33566719.8 |
| PGN0654 | <i>lipoprotein putative</i>                                                                                                     |          |        |       |                        |                      |                               |  |  |         |                        |        |            |            |
| PG0613  |                                                                                                                                 | 0.005103 | 60.77  | 97    | -0.67                  | 7.3                  | G                             |  |  | Y       | 0.037877               | -0.47  | 57744705.5 | 81546522.1 |
| PGN0656 | <i>hypothetical protein PG_0613</i>                                                                                             |          |        |       |                        |                      |                               |  |  |         |                        |        |            |            |
| PG0614  |                                                                                                                                 | 0.355429 | 58.64  | 76.5  | -0.38                  | 7.08                 | Y                             |  |  | Y       | 0.013691               | -0.34  | 70507661.5 | 88613623.5 |
| PGN0657 | <i>hypothetical protein PG_0614</i>                                                                                             |          |        |       |                        |                      |                               |  |  |         |                        |        |            |            |
| PG0615  |                                                                                                                                 | 0.000000 | 44.78  | 105.5 | -1.24                  | 7.23                 | G                             |  |  | G       | 0.005011               | -1.21  | 11415726.5 | 26367064.2 |
| PGN0658 | <i>typA GTP-binding protein TypA</i>                                                                                            |          |        |       |                        |                      |                               |  |  |         |                        |        |            |            |
| PG0616  |                                                                                                                                 | 0.000000 | 804.97 | 626   | 0.36                   | 10.48                | R                             |  |  | Y       | 0.037727               | 0.17   | 944284780  | 833567206  |
| PGN0659 | <i>thioredoxin putative</i>                                                                                                     |          |        |       |                        |                      |                               |  |  |         |                        |        |            |            |
| PG0618  |                                                                                                                                 | 0.125451 | 292.14 | 242.5 | 0.27                   | 9.06                 | Y                             |  |  | Y       | 0.191557               | 0.00   | 476288475  | 476061382  |
| PGN0660 | <i>alkyl hydroperoxide reductase C subunit</i>                                                                                  |          |        |       |                        |                      |                               |  |  |         |                        |        |            |            |
| PG0619  |                                                                                                                                 | 0.625271 | 18.13  | 25.5  | -0.49                  | 5.45                 | Y                             |  |  | Y       | 0.168269               | 0.01   | 11717294   | 11612563.9 |
| PGN0661 | <i>alkyl hydroperoxide reductase F subunit</i>                                                                                  |          |        |       |                        |                      |                               |  |  |         |                        |        |            |            |
| PG0620  |                                                                                                                                 | 0.164350 | 275.08 | 268   | 0.04                   | 9.09                 | Y                             |  |  | G       | 0.009306               | -0.38  | 77651462.5 | 100640402  |
| PGN0662 | <i>lon ATP-dependent protease La</i>                                                                                            |          |        |       |                        |                      |                               |  |  |         |                        |        |            |            |

| TIGR    | PgSgFn / Pg Spectral Count                                                              |         |        |       |                        |                      | PgSgFn / Pg Protein Intensity |  |   |          |                        |            |            |
|---------|-----------------------------------------------------------------------------------------|---------|--------|-------|------------------------|----------------------|-------------------------------|--|---|----------|------------------------|------------|------------|
|         | PGN                                                                                     | q-value | PgSgFn | Pg    | log <sub>2</sub> Ratio | log <sub>2</sub> Sum | Regulation                    |  |   | q-value  | log <sub>2</sub> Ratio | PgSgFn     | Pg         |
| PG0621  | 0.751373                                                                                | 27.72   | 34     | -0.29 | 5.95                   | Y                    |                               |  | Y | 0.055401 | 1.10                   | 98928695.5 | 19008879.3 |
| PGN0663 | <i>conserved hypothetical protein</i>                                                   |         |        |       |                        |                      |                               |  |   |          |                        |            |            |
| PG0622  | 0.275068                                                                                | 2.13    | 11     | -2.37 | 3.71                   | Y                    |                               |  | G | 0.003984 | -5.93                  | 66413      | 4110056.78 |
| PGN0664 | <i>hypothetical protein PG_0622</i>                                                     |         |        |       |                        |                      |                               |  |   |          |                        |            |            |
| PG0623  | 0.000000                                                                                | 1013.95 | 698    | 0.54  | 10.74                  | R                    |                               |  | R | 0.008458 | 0.35                   | 676686846  | 534120385  |
| PGN0665 | <i>tpiA triosephosphate isomerase</i>                                                   |         |        |       |                        |                      |                               |  |   |          |                        |            |            |
| PG0624  | 0.784897                                                                                | 2.13    | 5.5    | -1.37 | 2.93                   | Y                    |                               |  | G | 0.001427 | -5.30                  | 66413      | 2615973.1  |
| PGN0666 | <i>hypothetical protein PG_0624</i>                                                     |         |        |       |                        |                      |                               |  |   |          |                        |            |            |
| PG0625  | 0.600663                                                                                | 33.05   | 24.5   | 0.43  | 5.85                   | Y                    |                               |  | Y | 0.046400 | 0.74                   | 10734122   | 6619482.35 |
| PGN0667 | <i>foIE GTP cyclohydrolase I</i>                                                        |         |        |       |                        |                      |                               |  |   |          |                        |            |            |
| PG0627  | 0.779998                                                                                | 39.45   | 44.5   | -0.17 | 6.39                   | Y                    |                               |  | Y | 0.014837 | -0.29                  | 27125320   | 32978640.1 |
| PGN0668 | <i>RNA-binding protein</i>                                                              |         |        |       |                        |                      |                               |  |   |          |                        |            |            |
| PG0629  | 0.197758                                                                                | 7.46    | 15     | -1.01 | 4.49                   | Y                    |                               |  | Y | 0.093332 | -3.39                  | 5226177    | 8077927.83 |
| PGN0670 | <i>ppnK ATP-NAD kinase</i>                                                              |         |        |       |                        |                      |                               |  |   |          |                        |            |            |
| PG0630  | 0.778744                                                                                | 35.18   | 35.5   | -0.01 | 6.14                   | Y                    |                               |  | Y | 0.014335 | -0.68                  | 22624813   | 35158733.4 |
| PGN0671 | <i>pdxJ pyridoxal phosphate biosynthetic protein PdxJ</i>                               |         |        |       |                        |                      |                               |  |   |          |                        |            |            |
| PG0631  | 0.690619                                                                                | 49.04   | 42     | 0.22  | 6.51                   | Y                    |                               |  | Y | 0.012144 | -0.36                  | 24700447.5 | 31461498   |
| PGN0672 | <i>MotA/TolQ/ExbB proton channel family protein</i>                                     |         |        |       |                        |                      |                               |  |   |          |                        |            |            |
| PG0632  | 0.630045                                                                                | 22.39   | 25     | -0.16 | 5.57                   | Y                    |                               |  | G | 0.004902 | -0.73                  | 4513237.5  | 7397268.13 |
| PGN0673 | <i>biopolymer transport protein ExbD putative</i>                                       |         |        |       |                        |                      |                               |  |   |          |                        |            |            |
| PG0633  | 0.392640                                                                                | 9.6     | 10.5   | -0.13 | 4.33                   | Y                    |                               |  | Y | 0.058540 | -2.46                  | 1382424.5  | 2492461.2  |
| PGN0674 | <i>hypothetical protein PG_0633</i>                                                     |         |        |       |                        |                      |                               |  |   |          |                        |            |            |
| PG0634  | 0.012279                                                                                | 116.21  | 92.5   | 0.33  | 7.71                   | Y                    |                               |  | R | 0.000238 | 0.61                   | 54439025   | 35619535.4 |
| PGN0675 | <i>ThiJ/Pfpl family protein</i>                                                         |         |        |       |                        |                      |                               |  |   |          |                        |            |            |
| PG0637  | 0.751373                                                                                | 2.13    | 3      | -0.49 | 2.36                   | Y                    |                               |  | Y | 0.052108 | -2.23                  | 66413      | 2378005.5  |
| PGN0678 | <i>thiL thiamine monophosphate kinase</i>                                               |         |        |       |                        |                      |                               |  |   |          |                        |            |            |
| PG0638  | 0.017728                                                                                | 17.06   | 23     | -0.43 | 5.32                   | Y                    |                               |  | Y | 0.014536 | -3.84                  | 2827358    | 9463266.63 |
| PGN0679 | <i>lpxK tetraacyldisaccharide 4'-kinase</i>                                             |         |        |       |                        |                      |                               |  |   |          |                        |            |            |
| PG0639  | 0.448384                                                                                | 170.59  | 144    | 0.24  | 8.3                    | Y                    |                               |  | Y | 0.060576 | 0.10                   | 114494608  | 106977821  |
| PGN0680 | <i>sppA signal peptide peptidase SppA 67K type</i>                                      |         |        |       |                        |                      |                               |  |   |          |                        |            |            |
| PG0645  | 0.751373                                                                                | 26.65   | 24     | 0.15  | 5.66                   | Y                    |                               |  | Y | 0.149560 | -0.13                  | 6939358    | 7365310.53 |
| PGN0684 | <i>conserved domain protein</i>                                                         |         |        |       |                        |                      |                               |  |   |          |                        |            |            |
| PG0646  | 0.188231                                                                                | 8.53    | 6.5    | 0.39  | 3.91                   | Y                    |                               |  | Y | 0.078622 | -1.76                  | 11059040.5 | 3822612.28 |
| PGN0685 | <i>iron compound ABC transporter ATP-binding protein</i>                                |         |        |       |                        |                      |                               |  |   |          |                        |            |            |
| PG0648  | 0.634798                                                                                | 2.13    | 8      | -1.91 | 3.34                   | Y                    |                               |  | G | 0.000381 | -5.49                  | 66413      | 2955672.45 |
| PGN0687 | <i>iron compound ABC transporter periplasmic iron compound-binding protein putative</i> |         |        |       |                        |                      |                               |  |   |          |                        |            |            |
| PG0651  | 0.779998                                                                                | 2.13    | 6      | -1.49 | 3.02                   | Y                    |                               |  | G | 0.006115 | -4.83                  | 66413      | 1945207.8  |
| PGN0690 | <i>HDIG domain protein</i>                                                              |         |        |       |                        |                      |                               |  |   |          |                        |            |            |
| PG0652  | 0.001893                                                                                | 70.37   | 50     | 0.49  | 6.91                   | R                    |                               |  | Y | 0.037176 | -0.35                  | 9162947    | 11533551.4 |
| PGN0691 | <i>conserved hypothetical protein</i>                                                   |         |        |       |                        |                      |                               |  |   |          |                        |            |            |
| PG0653  | 0.022994                                                                                | 29.85   | 53     | -0.83 | 6.37                   | Y                    |                               |  | Y | 0.161524 | -0.34                  | 18696524.5 | 20263029.4 |
| PGN0692 | <i>serB phosphoserine phosphatase</i>                                                   |         |        |       |                        |                      |                               |  |   |          |                        |            |            |
| PG0654  | 0.553580                                                                                | 40.52   | 38     | 0.09  | 6.29                   | Y                    |                               |  | Y | 0.097582 | -0.13                  | 59627423   | 64457787.6 |
| PGN0693 | <i>hypothetical protein PG_0654</i>                                                     |         |        |       |                        |                      |                               |  |   |          |                        |            |            |
| PG0657  | 0.560362                                                                                | 2.13    | 8.5    | -2    | 3.41                   | Y                    |                               |  | G | 0.009634 | -3.35                  | 66413      | 713082.85  |
| PGN0695 | <i>maf maf protein</i>                                                                  |         |        |       |                        |                      |                               |  |   |          |                        |            |            |
| PG0658  | 0.414614                                                                                | 21.32   | 14.5   | 0.56  | 5.16                   | Y                    |                               |  | G | 0.003925 | -0.80                  | 6544966    | 11419881.2 |
| PGN0696 | <i>phosphatase YrbI family</i>                                                          |         |        |       |                        |                      |                               |  |   |          |                        |            |            |

| TIGR    | PgSgFn / Pg Spectral Count                                                             |         |        |                        |                      |            |          | PgSgFn / Pg Protein Intensity |            |            |  |  |
|---------|----------------------------------------------------------------------------------------|---------|--------|------------------------|----------------------|------------|----------|-------------------------------|------------|------------|--|--|
|         | q-value                                                                                | PgSgFn  | Pg     | log <sub>2</sub> Ratio | log <sub>2</sub> Sum | Regulation | q-value  | log <sub>2</sub> Ratio        | PgSgFn     | Pg         |  |  |
| PG0660  | 0.124597                                                                               | 9.6     | 18     | -0.91                  | 4.79                 | Y ●●       | 0.016357 | -3.73                         | 2479433    | 8256007.23 |  |  |
| PGN0698 | <i>nitroreductase family protein</i>                                                   |         |        |                        |                      |            |          |                               |            |            |  |  |
| PG0664  | 0.034230                                                                               | 23.46   | 40.5   | -0.79                  | 6                    | Y ●●       | 0.026006 | -0.97                         | 13382059   | 26868149.3 |  |  |
| PGN0700 | <i>oxidoreductase Gfo/l dh/MocA family</i>                                             |         |        |                        |                      |            |          |                               |            |            |  |  |
| PG0665  | 0.015259                                                                               | 2.13    | 15.5   | -2.86                  | 4.14                 | Y ●●       | 0.010571 | -4.77                         | 66413      | 1944008.03 |  |  |
| PGN0701 | <i>lacZ-1 beta-galactosidase</i>                                                       |         |        |                        |                      |            |          |                               |            |            |  |  |
| PG0668  | 0.000000                                                                               | 215.37  | 404.5  | -0.91                  | 9.28                 | G ●●       | 0.006916 | -0.57                         | 115872717  | 171957908  |  |  |
| PGN0704 | <i>TonB-dependent receptor</i>                                                         |         |        |                        |                      |            |          |                               |            |            |  |  |
| PG0669  | 0.115710                                                                               | 353.97  | 408    | -0.2                   | 9.57                 | Y ●●       | 0.019571 | -0.21                         | 384804408  | 444895852  |  |  |
| PGN0705 | <i>fetB heme-binding protein FetB</i>                                                  |         |        |                        |                      |            |          |                               |            |            |  |  |
| PG0670  | 0.102520                                                                               | 17.06   | 31.5   | -0.88                  | 5.6                  | Y ●●       | 0.086344 | -0.46                         | 11865247.5 | 14835903   |  |  |
| PGN0706 | <i>lipoprotein putative</i>                                                            |         |        |                        |                      |            |          |                               |            |            |  |  |
| PG0672  | 0.751373                                                                               | 2.13    | 3      | -0.49                  | 2.36                 | Y ●●       | 0.052108 | -1.70                         | 66413      | 1143500    |  |  |
| PGN0708 | <i>iron compound ABC transporter ATP-binding protein</i>                               |         |        |                        |                      |            |          |                               |            |            |  |  |
| PG0674  | 0.310078                                                                               | 84.23   | 64     | 0.4                    | 7.21                 | Y ●●       | 0.006700 | 0.44                          | 90688124   | 67060438.8 |  |  |
| PGN0709 | <i>iorB indolepyruvate ferredoxin oxidoreductase beta subunit</i>                      |         |        |                        |                      |            |          |                               |            |            |  |  |
| PG0675  | 0.394844                                                                               | 395.56  | 387.5  | 0.03                   | 9.61                 | Y ●●       | 0.000584 | 0.47                          | 257271663  | 186116641  |  |  |
| PGN0710 | <i>iorA indolepyruvate ferredoxin oxidoreductase alpha subunit</i>                     |         |        |                        |                      |            |          |                               |            |            |  |  |
| PG0676  | 0.130515                                                                               | 124.74  | 95     | 0.39                   | 7.78                 | Y ●●       | 0.055401 | 0.05                          | 109546459  | 105644334  |  |  |
| PGN0711 | <i>oxidoreductase short chain dehydrogenase/reductase family</i>                       |         |        |                        |                      |            |          |                               |            |            |  |  |
| PG0677  | 0.629057                                                                               | 90.63   | 99     | -0.13                  | 7.57                 | Y ●●       | 0.177260 | 0.01                          | 41342935   | 42046316.3 |  |  |
| PGN0713 | <i>LYS1 saccharopine dehydrogenase</i>                                                 |         |        |                        |                      |            |          |                               |            |            |  |  |
| PG0678  | 0.773021                                                                               | 2.13    | 6.5    | -1.61                  | 3.11                 | Y ●●       | 0.006475 | -5.87                         | 66413      | 4036026.5  |  |  |
| PGN0714 | <i>pyrazinamidase/nicotinamidase putative</i>                                          |         |        |                        |                      |            |          |                               |            |            |  |  |
| PG0686  | 0.522042                                                                               | 302.8   | 269.5  | 0.17                   | 9.16                 | Y ●●       | 0.067266 | -0.07                         | 165194851  | 173749743  |  |  |
| PGN0722 | <i>conserved hypothetical protein</i>                                                  |         |        |                        |                      |            |          |                               |            |            |  |  |
| PG0687  | 0.000000                                                                               | 4314.87 | 5735   | -0.41                  | 13.29                | G ●●       | 0.020083 | 0.16                          | 4.3387e+09 | 3.8906e+09 |  |  |
| PGN0723 | <i>sucD succinate-semialdehyde dehydrogenase</i>                                       |         |        |                        |                      |            |          |                               |            |            |  |  |
| PG0689  | 0.000000                                                                               | 1643    | 1998   | -0.28                  | 11.83                | G ●●       | 0.039451 | -0.12                         | 1.8209e+09 | 1.9759e+09 |  |  |
| PGN0724 | <i>4hbD NAD-dependent 4-hydroxybutyrate dehydrogenase</i>                              |         |        |                        |                      |            |          |                               |            |            |  |  |
| PG0690  | 0.000000                                                                               | 711.15  | 1109   | -0.64                  | 10.83                | G ●●       | 0.007211 | -0.34                         | 507114556  | 643634260  |  |  |
| PGN0725 | <i>abfT-1 4-hydroxybutyrate CoA-transferase</i>                                        |         |        |                        |                      |            |          |                               |            |            |  |  |
| PG0691  | 0.758093                                                                               | 2.13    | 6.5    | -1.61                  | 3.11                 | Y ●●       | 0.001728 | -6.63                         | 66413      | 6591124.8  |  |  |
| PGN0726 | <i>NifU-related protein</i>                                                            |         |        |                        |                      |            |          |                               |            |            |  |  |
| PG0692  | 0.216220                                                                               | 5587.89 | 5420.5 | 0.04                   | 13.43                | Y ●●       | 0.147498 | -0.03                         | 4.1133e+09 | 4.2002e+09 |  |  |
| PGN0727 | <i>abfD 4-hydroxybutyryl-CoA dehydratase</i>                                           |         |        |                        |                      |            |          |                               |            |            |  |  |
| PG0694  | 0.000000                                                                               | 1803.99 | 2501.5 | -0.47                  | 12.07                | G ●●       | 0.119527 | 0.04                          | 1.8822e+09 | 1.8272e+09 |  |  |
| PGN0728 | <i>immunoreactive 42 kDa antigen PG33</i>                                              |         |        |                        |                      |            |          |                               |            |            |  |  |
| PG0695  | 0.000000                                                                               | 1302.88 | 1410   | -0.11                  | 11.41                | G ●●       | 0.032387 | -0.14                         | 1.6837e+09 | 1.8518e+09 |  |  |
| PGN0729 | <i>immunoreactive 43 kDa antigen PG32</i>                                              |         |        |                        |                      |            |          |                               |            |            |  |  |
| PG0698  | 0.779998                                                                               | 2.13    | 2.5    | -0.23                  | 2.21                 | Y ●●       | 0.052108 | -2.25                         | 66413      | 1884872.75 |  |  |
| PGN0732 | <i>lipoprotein putative</i>                                                            |         |        |                        |                      |            |          |                               |            |            |  |  |
| PG0699  | 0.008708                                                                               | 92.76   | 135    | -0.54                  | 7.83                 | G ●●       | 0.005259 | -0.78                         | 35823963.5 | 61565342.7 |  |  |
| PGN0733 | <i>malP maltodextrin phosphorylase</i>                                                 |         |        |                        |                      |            |          |                               |            |            |  |  |
| PG0701  | 0.658227                                                                               | 2.13    | 7.5    | -1.82                  | 3.27                 | Y ●●       | 0.009241 | -5.47                         | 66413      | 3131346.93 |  |  |
| PGN0735 | <i>cobU cobinamide kinase/cobinamide phosphate guanylyltransferase</i>                 |         |        |                        |                      |            |          |                               |            |            |  |  |
| PG0702  | 0.634798                                                                               | 2.13    | 8      | -1.91                  | 3.34                 | Y ●●       | 0.001865 | -5.76                         | 66413      | 3599967.9  |  |  |
| PGN0736 | <i>nicotinate-nucleotide--dimethylbenzimidazole phosphoribosyltransferase putative</i> |         |        |                        |                      |            |          |                               |            |            |  |  |



| TIGR    | PgSgFn / Pg Spectral Count                                     |         |        |       |                        |                      | PgSgFn / Pg Protein Intensity |  |   |          |                        |            |            |
|---------|----------------------------------------------------------------|---------|--------|-------|------------------------|----------------------|-------------------------------|--|---|----------|------------------------|------------|------------|
|         | PGN                                                            | q-value | PgSgFn | Pg    | log <sub>2</sub> Ratio | log <sub>2</sub> Sum | Regulation                    |  |   | q-value  | log <sub>2</sub> Ratio | PgSgFn     | Pg         |
| PG0704  | 0.784897                                                       | 2.13    | 2      | 0.09  | 2.05                   | Y                    |                               |  | Y | 0.052108 | -1.90                  | 66413      | 1152105.78 |
| PGN0738 | <i>phosphoglycerate mutase family protein</i>                  |         |        |       |                        |                      |                               |  |   |          |                        |            |            |
| PG0705  | 0.278503                                                       | 67.17   | 85     | -0.34 | 7.25                   | Y                    |                               |  | Y | 0.014081 | -0.61                  | 24341980   | 36882212.3 |
| PGN0739 | <i>murl glutamate racemase</i>                                 |         |        |       |                        |                      |                               |  |   |          |                        |            |            |
| PG0706  | 0.600049                                                       | 2.13    | 8.5    | -2    | 3.41                   | Y                    |                               |  | G | 0.008512 | -5.75                  | 66413      | 3764947.08 |
| PGN0740 | <i>hypothetical protein PG_0706</i>                            |         |        |       |                        |                      |                               |  |   |          |                        |            |            |
| PG0707  | 0.004964                                                       | 721.81  | 787    | -0.12 | 10.56                  | G                    |                               |  | Y | 0.104719 | -0.07                  | 483641686  | 508809189  |
| PGN0741 | <i>TonB-dependent receptor putative</i>                        |         |        |       |                        |                      |                               |  |   |          |                        |            |            |
| PG0708  | 0.000000                                                       | 334.78  | 557    | -0.73 | 9.8                    | G                    |                               |  | G | 0.004902 | -0.12                  | 243576699  | 264610247  |
| PGN0742 | <i>peptidyl-prolyl cis-trans isomerase FKBP-type</i>           |         |        |       |                        |                      |                               |  |   |          |                        |            |            |
| PG0709  | 0.422376                                                       | 83.16   | 66.5   | 0.32  | 7.23                   | Y                    |                               |  | Y | 0.052108 | 0.15                   | 59017389.5 | 53161089.8 |
| PGN0743 | <i>fkpA peptidyl-prolyl cis-trans isomerase FkpA FKBP-type</i> |         |        |       |                        |                      |                               |  |   |          |                        |            |            |
| PG0710  | 0.043835                                                       | 67.17   | 76.5   | -0.19 | 7.17                   | Y                    |                               |  | Y | 0.078622 | 0.07                   | 27055007   | 25777251.7 |
| PGN0744 | <i>peptidyl-prolyl cis-trans isomerase FKBP-type</i>           |         |        |       |                        |                      |                               |  |   |          |                        |            |            |
| PG0712  | 0.779998                                                       | 24.52   | 28     | -0.19 | 5.71                   | Y                    |                               |  | Y | 0.030145 | -0.49                  | 11798919.5 | 16955132.6 |
| PGN0746 | <i>hypothetical protein PG_0712</i>                            |         |        |       |                        |                      |                               |  |   |          |                        |            |            |
| PG0713  | 0.475857                                                       | 2.13    | 9      | -2.08 | 3.48                   | Y                    |                               |  | G | 0.000743 | -5.17                  | 66413      | 2367320    |
| PGN0747 | <i>trpG anthranilate synthase component II</i>                 |         |        |       |                        |                      |                               |  |   |          |                        |            |            |
| PG0714  | 0.000003                                                       | 2.13    | 26     | -3.61 | 4.81                   | Y                    |                               |  | G | 0.000052 | -7.81                  | 66413      | 14746401.6 |
| PGN0750 | <i>cutC copper homeostasis protein CutC</i>                    |         |        |       |                        |                      |                               |  |   |          |                        |            |            |
| PG0715  | 0.014718                                                       | 2.13    | 16     | -2.91 | 4.18                   | Y                    |                               |  | G | 0.002733 | -6.35                  | 66413      | 5441875.48 |
| PGN0751 | <i>transporter</i>                                             |         |        |       |                        |                      |                               |  |   |          |                        |            |            |
| PG0724  | 0.779998                                                       | 213.24  | 219.5  | -0.04 | 8.76                   | Y                    |                               |  | G | 0.007580 | -0.58                  | 141043767  | 210366536  |
| PGN0756 | <i>prolyl oligopeptidase family protein</i>                    |         |        |       |                        |                      |                               |  |   |          |                        |            |            |
| PG0725  | 0.264342                                                       | 2.13    | 11     | -2.37 | 3.71                   | Y                    |                               |  | G | 0.004508 | -5.57                  | 66413      | 3204241.43 |
| PGN0757 | <i>hydrolase haloacid dehalogenase-like family</i>             |         |        |       |                        |                      |                               |  |   |          |                        |            |            |
| PG0726  | 0.000719                                                       | 83.16   | 52.5   | 0.66  | 7.08                   | R                    |                               |  | Y | 0.026630 | -0.38                  | 89450626   | 115653052  |
| PGN0758 | <i>lipoprotein putative</i>                                    |         |        |       |                        |                      |                               |  |   |          |                        |            |            |
| PG0728  | 0.549619                                                       | 2.13    | 9      | -2.08 | 3.48                   | Y                    |                               |  | G | 0.001091 | -5.93                  | 66413      | 4021974.58 |
| PGN0759 | <i>conserved hypothetical protein</i>                          |         |        |       |                        |                      |                               |  |   |          |                        |            |            |
| PG0729  | 0.053706                                                       | 2.13    | 14     | -2.72 | 4.01                   | Y                    |                               |  | G | 0.000107 | -7.34                  | 66413      | 10633168.4 |
| PGN0760 | <i>ddlA D-alanine--D-alanine ligase</i>                        |         |        |       |                        |                      |                               |  |   |          |                        |            |            |
| PG0731  | 0.692989                                                       | 2.13    | 3.5    | -0.72 | 2.49                   | Y                    |                               |  | Y | 0.052108 | -2.21                  | 66413      | 1776709.13 |
| PGN0762 | <i>hypothetical protein PG_0731</i>                            |         |        |       |                        |                      |                               |  |   |          |                        |            |            |
| PG0733  | 0.786859                                                       | 92.76   | 94     | -0.02 | 7.55                   | Y                    |                               |  | Y | 0.034691 | -0.39                  | 53454561.5 | 69757810.5 |
| PGN0764 | <i>ribE riboflavin synthase alpha subunit</i>                  |         |        |       |                        |                      |                               |  |   |          |                        |            |            |
| PG0734  | 0.229573                                                       | 8.53    | 12.5   | -0.55 | 4.39                   | Y                    |                               |  | Y | 0.163917 | -2.79                  | 7819505    | 6650003.05 |
| PGN0765 | <i>nitroreductase family protein</i>                           |         |        |       |                        |                      |                               |  |   |          |                        |            |            |
| PG0735  | 0.000000                                                       | 9.6     | 52.5   | -2.45 | 5.96                   | G                    |                               |  | G | 0.008795 | -4.39                  | 2686443    | 13656867.8 |
| PGN0766 | <i>aminotransferase class V</i>                                |         |        |       |                        |                      |                               |  |   |          |                        |            |            |
| PG0738  | 0.779998                                                       | 2.13    | 2.5    | -0.23 | 2.21                   | Y                    |                               |  | Y | 0.057050 | -0.97                  | 66413      | 327749.525 |
| PGN0769 | <i>cytidine/deoxycytidylate deaminase family protein</i>       |         |        |       |                        |                      |                               |  |   |          |                        |            |            |
| PG0739  | 0.608229                                                       | 2.13    | 8.5    | -2    | 3.41                   | Y                    |                               |  | G | 0.003547 | -5.85                  | 66413      | 3871715.88 |
| PGN0770 | <i>metallo-beta-lactamase family protein</i>                   |         |        |       |                        |                      |                               |  |   |          |                        |            |            |
| PG0745  | 0.779998                                                       | 2.13    | 2.5    | -0.23 | 2.21                   | Y                    |                               |  | Y | 0.054755 | -1.18                  | 66413      | 437767.925 |
| PGN0773 | <i>lactoylglutathione lyase putative</i>                       |         |        |       |                        |                      |                               |  |   |          |                        |            |            |
| PG0747  | 0.507925                                                       | 2.13    | 4.5    | -1.08 | 2.73                   | Y                    |                               |  | Y | 0.052108 | -2.06                  | 66413      | 1450407.38 |
| PGN0775 | <i>sigma-54 dependent DNA-binding response regulator</i>       |         |        |       |                        |                      |                               |  |   |          |                        |            |            |

| TIGR    | PgSgFn / Pg Spectral Count                                 |         |       |                        |                      |                                                                                                                                                                              | PgSgFn / Pg Protein Intensity |                        |            |            |  |  |
|---------|------------------------------------------------------------|---------|-------|------------------------|----------------------|------------------------------------------------------------------------------------------------------------------------------------------------------------------------------|-------------------------------|------------------------|------------|------------|--|--|
|         | q-value                                                    | PgSgFn  | Pg    | log <sub>2</sub> Ratio | log <sub>2</sub> Sum | Regulation                                                                                                                                                                   | q-value                       | log <sub>2</sub> Ratio | PgSgFn     | Pg         |  |  |
| PG0750  | 0.720026                                                   | 2.13    | 7.5   | -1.82                  | 3.27                 | Y   G     | 0.001156                      | -5.08                  | 66413      | 2230381.6  |  |  |
| PGN0777 | <i>glycosyl transferase group 2 family protein</i>         |         |       |                        |                      |                                                                                                                                                                              |                               |                        |            |            |  |  |
| PG0751  | 0.340826                                                   | 10.66   | 14    | -0.39                  | 4.62                 | Y   Y     | 0.087085                      | -3.06                  | 4166263    | 6588936.28 |  |  |
| PGN0778 | <i>porT porT protein</i>                                   |         |       |                        |                      |                                                                                                                                                                              |                               |                        |            |            |  |  |
| PG0752  | 0.000003                                                   | 2.13    | 26    | -3.61                  | 4.81                 | Y   G     | 0.000091                      | -8.45                  | 66413      | 22990565.9 |  |  |
| PGN0779 | <i>uracil phosphoribosyltransferase putative</i>           |         |       |                        |                      |                                                                                                                                                                              |                               |                        |            |            |  |  |
| PG0754  | 0.001057                                                   | 28.79   | 59    | -1.04                  | 6.46                 | G   Y     | 0.090791                      | -0.53                  | 25035539   | 31973379.1 |  |  |
| PGN0781 | <i>topA DNA topoisomerase I</i>                            |         |       |                        |                      |                                                                                                                                                                              |                               |                        |            |            |  |  |
| PG0756  | 0.217007                                                   | 2.13    | 11    | -2.37                  | 3.71                 | Y   G     | 0.000436                      | -5.90                  | 66413      | 3936955.98 |  |  |
| PGN0786 | <i>conserved hypothetical protein</i>                      |         |       |                        |                      |                                                                                                                                                                              |                               |                        |            |            |  |  |
| PG0757  | 0.009465                                                   | 10.66   | 20    | -0.91                  | 4.94                 | G   Y     | 0.013019                      | -4.04                  | 1132841    | 7121154.15 |  |  |
| PGN0787 | <i>hypothetical protein PG_0757</i>                        |         |       |                        |                      |                                                                                                                                                                              |                               |                        |            |            |  |  |
| PG0758  | 0.000003                                                   | 639.71  | 508   | 0.33                   | 10.16                | R   Y     | 0.014816                      | 0.09                   | 586425120  | 551452784  |  |  |
| PGN0788 | <i>dcp-1 peptidyl-dipeptidase Dcp</i>                      |         |       |                        |                      |                                                                                                                                                                              |                               |                        |            |            |  |  |
| PG0759  | 0.000016                                                   | 55.44   | 104.5 | -0.91                  | 7.32                 | G   Y     | 0.014959                      | -0.43                  | 37204969.5 | 49960382.3 |  |  |
| PGN0789 | <i>TPR domain protein</i>                                  |         |       |                        |                      |                                                                                                                                                                              |                               |                        |            |            |  |  |
| PG0762  | 0.550186                                                   | 198.31  | 218   | -0.14                  | 8.7                  | Y   Y     | 0.178380                      | -0.03                  | 225048943  | 227601445  |  |  |
| PGN0791 | <i>trigger factor putative</i>                             |         |       |                        |                      |                                                                                                                                                                              |                               |                        |            |            |  |  |
| PG0766  | 0.630045                                                   | 546.95  | 542.5 | 0.01                   | 10.09                | Y   Y     | 0.190624                      | 0.01                   | 621108363  | 620143793  |  |  |
| PGN0792 | <i>pnpA polyribonucleotide nucleotidyltransferase</i>      |         |       |                        |                      |                                                                                                                                                                              |                               |                        |            |            |  |  |
| PG0767  | 0.553580                                                   | 29.85   | 35    | -0.23                  | 6.02                 | Y   Y     | 0.030979                      | 0.51                   | 15429387   | 10989666.1 |  |  |
| PGN0793 | <i>malQ 4-alpha-glucanotransferase</i>                     |         |       |                        |                      |                                                                                                                                                                              |                               |                        |            |            |  |  |
| PG0768  | 0.134175                                                   | 2.13    | 12.5  | -2.55                  | 3.87                 | Y   G   | 0.000581                      | -5.87                  | 66413      | 3845135.75 |  |  |
| PGN0794 | <i>conserved hypothetical protein</i>                      |         |       |                        |                      |                                                                                                                                                                              |                               |                        |            |            |  |  |
| PG0769  | 0.408616                                                   | 88.49   | 81    | 0.13                   | 7.41                 | Y   Y | 0.136314                      | -0.09                  | 63188268   | 66623403.5 |  |  |
| PGN0795 | <i>fibronectin type III domain protein</i>                 |         |       |                        |                      |                                                                                                                                                                              |                               |                        |            |            |  |  |
| PG0775  | 0.000000                                                   | 765.52  | 982   | -0.36                  | 10.77                | G   Y | 0.019334                      | 0.21                   | 561140531  | 484665261  |  |  |
| PGN0799 | <i>acyl-CoA dehydrogenase family protein</i>               |         |       |                        |                      |                                                                                                                                                                              |                               |                        |            |            |  |  |
| PG0776  | 0.000000                                                   | 840.16  | 689.5 | 0.29                   | 10.58                | R   Y | 0.149560                      | 0.03                   | 557072609  | 547060238  |  |  |
| PGN0800 | <i>etfA-1 electron transfer flavoprotein alpha subunit</i> |         |       |                        |                      |                                                                                                                                                                              |                               |                        |            |            |  |  |
| PG0777  | 0.013991                                                   | 1066.19 | 940   | 0.18                   | 10.97                | Y   Y | 0.044266                      | 0.23                   | 589001999  | 498493839  |  |  |
| PGN0801 | <i>etfB-1 electron transfer flavoprotein beta subunit</i>  |         |       |                        |                      |                                                                                                                                                                              |                               |                        |            |            |  |  |
| PG0778  | 0.751373                                                   | 2.13    | 3     | -0.49                  | 2.36                 | Y   Y | 0.052108                      | -2.04                  | 66413      | 1400693    |  |  |
| PGN0802 | <i>conserved hypothetical protein</i>                      |         |       |                        |                      |                                                                                                                                                                              |                               |                        |            |            |  |  |
| PG0779  | 0.751373                                                   | 56.51   | 64    | -0.18                  | 6.91                 | Y   Y | 0.076556                      | -0.04                  | 77819241   | 80061237.4 |  |  |
| PGN0803 | <i>hypothetical protein PG_0779</i>                        |         |       |                        |                      |                                                                                                                                                                              |                               |                        |            |            |  |  |
| PG0780  | 0.549619                                                   | 123.68  | 138   | -0.16                  | 8.03                 | Y   Y | 0.045407                      | -0.35                  | 157527463  | 199569315  |  |  |
| PGN0804 | <i>hypothetical protein PG_0780</i>                        |         |       |                        |                      |                                                                                                                                                                              |                               |                        |            |            |  |  |
| PG0782  | 0.000000                                                   | 683.43  | 497.5 | 0.46                   | 10.21                | R   Y | 0.109736                      | -0.02                  | 1.5235e+09 | 1.5469e+09 |  |  |
| PGN0806 | <i>MotA/TolQ/ExbB proton channel family protein</i>        |         |       |                        |                      |                                                                                                                                                                              |                               |                        |            |            |  |  |
| PG0784  | 0.000130                                                   | 89.56   | 49    | 0.87                   | 7.11                 | R   Y | 0.077211                      | -0.15                  | 27602312.5 | 30490724.4 |  |  |
| PGN0808 | <i>polyprenyl synthetase</i>                               |         |       |                        |                      |                                                                                                                                                                              |                               |                        |            |            |  |  |
| PG0785  | 0.602724                                                   | 93.82   | 102   | -0.12                  | 7.61                 | Y   Y | 0.058540                      | -0.27                  | 153126680  | 187230371  |  |  |
| PGN0809 | <i>tonB protein putative</i>                               |         |       |                        |                      |                                                                                                                                                                              |                               |                        |            |            |  |  |
| PG0788  | 0.134175                                                   | 2.13    | 12.5  | -2.55                  | 3.87                 | Y   G | 0.000159                      | -6.22                  | 66413      | 4910824.55 |  |  |
| PGN0811 | <i>hypothetical protein PG_0788</i>                        |         |       |                        |                      |                                                                                                                                                                              |                               |                        |            |            |  |  |
| PG0789  | 0.779998                                                   | 2.13    | 2.5   | -0.23                  | 2.21                 | Y   Y | 0.060075                      | -0.80                  | 66413      | 263545.75  |  |  |
| PGN0812 | <i>conserved hypothetical protein</i>                      |         |       |                        |                      |                                                                                                                                                                              |                               |                        |            |            |  |  |



| TIGR    | PgSgFn / Pg Spectral Count                                                               |         |        |       |                        |                      |                                                                                                                                                                          | PgSgFn / Pg Protein Intensity |                        |        |            |            |
|---------|------------------------------------------------------------------------------------------|---------|--------|-------|------------------------|----------------------|--------------------------------------------------------------------------------------------------------------------------------------------------------------------------|-------------------------------|------------------------|--------|------------|------------|
|         | PGN                                                                                      | q-value | PgSgFn | Pg    | log <sub>2</sub> Ratio | log <sub>2</sub> Sum | Regulation                                                                                                                                                               | q-value                       | log <sub>2</sub> Ratio | PgSgFn | Pg         |            |
| PG0790  | 0.020067                                                                                 | 25.59   | 10.5   | 1.29  | 5.17                   | Y                    |       | R                             | 0.002035               | 1.97   | 14004852.5 | 3628265    |
| PGN0813 | <i>obg GTP-binding protein Obg</i>                                                       |         |        |       |                        |                      |                                                                                                                                                                          |                               |                        |        |            |            |
| PG0791  | 0.064532                                                                                 | 125.81  | 94     | 0.42  | 7.78                   | Y                    |       | Y                             | 0.149560               | 0.02   | 43209519   | 42434562.8 |
| PGN0814 | <i>adk adenylate kinase</i>                                                              |         |        |       |                        |                      |                                                                                                                                                                          |                               |                        |        |            |            |
| PG0792  | 0.251314                                                                                 | 6.4     | 14     | -1.13 | 4.35                   | Y                    |       | Y                             | 0.104719               | -3.13  | 4042571.5  | 5965923.08 |
| PGN0815 | <i>hpt hypoxanthine phosphoribosyltransferase</i>                                        |         |        |       |                        |                      |                                                                                                                                                                          |                               |                        |        |            |            |
| PG0793  | 0.516095                                                                                 | 197.24  | 170    | 0.21  | 8.52                   | Y                    |       | Y                             | 0.094935               | -0.15  | 163502494  | 179900032  |
| PGN0816 | <i>fbp fructose-16-bisphosphatase</i>                                                    |         |        |       |                        |                      |                                                                                                                                                                          |                               |                        |        |            |            |
| PG0794  | 0.608229                                                                                 | 23.46   | 30.5   | -0.38 | 5.75                   | Y                    |       | Y                             | 0.080059               | -0.19  | 7522304    | 8745994.8  |
| PGN0817 | <i>penicillin-binding protein 1A putative</i>                                            |         |        |       |                        |                      |                                                                                                                                                                          |                               |                        |        |            |            |
| PG0796  | 0.009526                                                                                 | 60.77   | 93.5   | -0.62 | 7.27                   | G                    |       | Y                             | 0.052108               | -0.45  | 33484534.5 | 43777106.1 |
| PGN0819 | <i>leuS leucyl-tRNA synthetase</i>                                                       |         |        |       |                        |                      |                                                                                                                                                                          |                               |                        |        |            |            |
| PG0800  | 0.560362                                                                                 | 2.13    | 8.5    | -2    | 3.41                   | Y                    |       | Y                             | 0.014025               | -4.00  | 66413      | 1167674.98 |
| PGN0823 | <i>conserved hypothetical protein</i>                                                    |         |        |       |                        |                      |                                                                                                                                                                          |                               |                        |        |            |            |
| PG0801  | 0.600049                                                                                 | 2.13    | 8.5    | -2    | 3.41                   | Y                    |       | G                             | 0.000044               | -5.28  | 66413      | 2556548.88 |
| PGN0824 | <i>polyA polymerase family protein</i>                                                   |         |        |       |                        |                      |                                                                                                                                                                          |                               |                        |        |            |            |
| PG0802  | 0.429193                                                                                 | 88.49   | 71.5   | 0.31  | 7.32                   | Y                    |       | Y                             | 0.017767               | -0.33  | 70519436   | 88902501.8 |
| PGN0826 | <i>pdhD alpha keto acid dehydrogenase complex E3 component lipoamide dehydrogenase</i>   |         |        |       |                        |                      |                                                                                                                                                                          |                               |                        |        |            |            |
| PG0803  | 0.074026                                                                                 | 10.66   | 16.5   | -0.63 | 4.76                   | Y                    |       | Y                             | 0.161132               | -3.17  | 13142267.5 | 10979458.2 |
| PGN0827 | <i>nagB glucosamine-6-phosphate isomerase</i>                                            |         |        |       |                        |                      |                                                                                                                                                                          |                               |                        |        |            |            |
| PG0804  | 0.123033                                                                                 | 150.33  | 177    | -0.24 | 8.35                   | Y                    |       | Y                             | 0.130581               | 0.07   | 180453867  | 169058428  |
| PGN0828 | <i>flavodoxin</i>                                                                        |         |        |       |                        |                      |                                                                                                                                                                          |                               |                        |        |            |            |
| PG0805  | 0.418300                                                                                 | 6.4     | 11.5   | -0.85 | 4.16                   | Y                    |       | Y                             | 0.088585               | -3.23  | 4022770.5  | 6405081.55 |
| PGN0829 | <i>lgt prolipoprotein diacylglyceryl transferase</i>                                     |         |        |       |                        |                      |                                                                                                                                                                          |                               |                        |        |            |            |
| PG0806  | 0.000028                                                                                 | 6.4     | 30.5   | -2.25 | 5.21                   | G                    |     | G                             | 0.001168               | -5.44  | 2396082    | 22498789.8 |
| PGN0830 | <i>oxidoreductase Gfo/Ldh/MocA family</i>                                                |         |        |       |                        |                      |                                                                                                                                                                          |                               |                        |        |            |            |
| PG0807  | 0.024177                                                                                 | 71.43   | 44     | 0.7   | 6.85                   | Y                    |   | Y                             | 0.018197               | 0.54   | 42721521.5 | 29015884.6 |
| PGN0831 | <i>NusB family protein</i>                                                               |         |        |       |                        |                      |                                                                                                                                                                          |                               |                        |        |            |            |
| PG0809  | 0.194026                                                                                 | 82.1    | 95.5   | -0.22 | 7.47                   | Y                    |   | G                             | 0.007601               | -0.71  | 23617242.5 | 38964422.9 |
| PGN0832 | <i>hypothetical protein PG_0809</i>                                                      |         |        |       |                        |                      |                                                                                                                                                                          |                               |                        |        |            |            |
| PG0811  | 0.765921                                                                                 | 22.39   | 17.5   | 0.36  | 5.32                   | Y                    |   | G                             | 0.000238               | -0.45  | 9771882.5  | 13325933   |
| PGN0833 | <i>ruvA Holliday junction DNA helicase RuvA</i>                                          |         |        |       |                        |                      |                                                                                                                                                                          |                               |                        |        |            |            |
| PG1493  | 0.000393                                                                                 | 14.93   | 39.5   | -1.4  | 5.77                   | G                    |   | G                             | 0.001694               | -1.52  | 5124476.5  | 14228449.1 |
| PGN0836 | <i>hypothetical protein PG_1493</i>                                                      |         |        |       |                        |                      |                                                                                                                                                                          |                               |                        |        |            |            |
| PG1492  | 0.000148                                                                                 | 12.79   | 2.5    | 2.36  | 3.93                   | Y                    |   | Y                             | 0.055401               | 2.15   | 16726092   | 1858834.48 |
| PGN0837 | <i>hypothetical protein PG_1492</i>                                                      |         |        |       |                        |                      |                                                                                                                                                                          |                               |                        |        |            |            |
| PG1433  | 0.097639                                                                                 | 28.79   | 17.5   | 0.72  | 5.53                   | Y                    |   | Y                             | 0.019334               | 0.61   | 18451228   | 11842858.4 |
| PGN0840 | <i>hydrolase</i>                                                                         |         |        |       |                        |                      |                                                                                                                                                                          |                               |                        |        |            |            |
| PG1434  | 0.173614                                                                                 | 2.13    | 12     | -2.49 | 3.82                   | Y                    |   | G                             | 0.008458               | -4.97  | 66413      | 2182369.9  |
| PGN0841 | <i>ispD 4-diphosphocytidyl-2C-methyl-D-erythritol synthase</i>                           |         |        |       |                        |                      |                                                                                                                                                                          |                               |                        |        |            |            |
| PG1374  | 0.003339                                                                                 | 302.8   | 239.5  | 0.34  | 9.08                   | R                    |   | Y                             | 0.059515               | 0.19   | 205559437  | 179667093  |
| PGN0852 | <i>immunoreactive 47 kDa antigen PG97</i>                                                |         |        |       |                        |                      |                                                                                                                                                                          |                               |                        |        |            |            |
| PG1379  | 0.225676                                                                                 | 36.25   | 41.5   | -0.2  | 6.28                   | Y                    |   | Y                             | 0.049354               | -0.39  | 15485633   | 19688930.4 |
| PGN0857 | <i>ABC transporter periplasmic substrate-binding protein putative</i>                    |         |        |       |                        |                      |                                                                                                                                                                          |                               |                        |        |            |            |
| PG1382  | 0.000108                                                                                 | 68.24   | 115.5  | -0.76 | 7.52                   | G                    |   | Y                             | 0.012832               | -0.34  | 68161283.5 | 86861735.2 |
| PGN0860 | <i>hypothetical protein PG_1382</i>                                                      |         |        |       |                        |                      |                                                                                                                                                                          |                               |                        |        |            |            |
| PG1397  | 0.587072                                                                                 | 94.89   | 110    | -0.21 | 7.68                   | Y                    |   | Y                             | 0.157620               | -0.06  | 74575189.5 | 76782195.6 |
| PGN0865 | <i>purH phosphoribosylaminoimidazolecarboxamide formyltransferase/IMP cyclohydrolase</i> |         |        |       |                        |                      |                                                                                                                                                                          |                               |                        |        |            |            |

| TIGR    | PgSgFn / Pg Spectral Count                            |         |        |       |                        |                      |            | PgSgFn / Pg Protein Intensity |                        |          |       |            |            |
|---------|-------------------------------------------------------|---------|--------|-------|------------------------|----------------------|------------|-------------------------------|------------------------|----------|-------|------------|------------|
|         | PGN                                                   | q-value | PgSgFn | Pg    | log <sub>2</sub> Ratio | log <sub>2</sub> Sum | Regulation | q-value                       | log <sub>2</sub> Ratio | PgSgFn   | Pg    |            |            |
| PG1396  | 0.003529                                              | 70.37   | 109.5  | -0.64 | 7.49                   | G                    |            |                               | G                      | 0.002046 | -0.86 | 55243881   | 99260738   |
| PGN0866 | <i>mreB cell shape-determining protein MreB</i>       |         |        |       |                        |                      |            |                               |                        |          |       |            |            |
| PG1395  | 0.751373                                              | 2.13    | 3      | -0.49 | 2.36                   | Y                    |            |                               | Y                      | 0.052108 | -2.29 | 66413      | 1991744.5  |
| PGN0867 | <i>cell shape-determining protein MreC putative</i>   |         |        |       |                        |                      |            |                               |                        |          |       |            |            |
| PG1393  | 0.779998                                              | 2.13    | 2.5    | -0.23 | 2.21                   | Y                    |            |                               | Y                      | 0.053629 | -1.33 | 66413      | 532384.575 |
| PGN0869 | <i>penicillin-binding protein 2 putative</i>          |         |        |       |                        |                      |            |                               |                        |          |       |            |            |
| PG1389  | 0.031308                                              | 57.57   | 33.5   | 0.78  | 6.51                   | Y                    |            |                               | Y                      | 0.121255 | 0.03  | 82802254   | 63813474.6 |
| PGN0872 | <i>DNA-binding protein histone-like family</i>        |         |        |       |                        |                      |            |                               |                        |          |       |            |            |
| PG1388  | 0.058464                                              | 2.13    | 13     | -2.61 | 3.92                   | Y                    |            |                               | Y                      | 0.026295 | -5.36 | 66413      | 3526145.83 |
| PGN0873 | <i>hypothetical protein PG_1388</i>                   |         |        |       |                        |                      |            |                               |                        |          |       |            |            |
| PG1387  | 0.492890                                              | 18.13   | 11     | 0.72  | 4.86                   | Y                    |            |                               | Y                      | 0.124354 | -0.22 | 5246444.5  | 6634182.68 |
| PGN0874 | <i>hypothetical protein PG_1387</i>                   |         |        |       |                        |                      |            |                               |                        |          |       |            |            |
| PG1386  | 0.542387                                              | 224.97  | 199    | 0.18  | 8.73                   | Y                    |            |                               | Y                      | 0.022204 | -0.11 | 168161805  | 181174995  |
| PGN0875 | <i>gyrA DNA gyrase A subunit</i>                      |         |        |       |                        |                      |            |                               |                        |          |       |            |            |
| PG1385  | 0.000000                                              | 713.28  | 379    | 0.91  | 10.09                  | R                    |            |                               | R                      | 0.001392 | 0.37  | 808318980  | 626400150  |
| PGN0876 | <i>TPR domain protein</i>                             |         |        |       |                        |                      |            |                               |                        |          |       |            |            |
| PG1401  | 0.667335                                              | 843.36  | 851    | -0.01 | 10.73                  | Y                    |            |                               | G                      | 0.003146 | -0.52 | 921368767  | 1.3245e+09 |
| PGN0880 | <i>beta-eliminating lyase</i>                         |         |        |       |                        |                      |            |                               |                        |          |       |            |            |
| PG1402  | 0.275068                                              | 2.13    | 11     | -2.37 | 3.71                   | Y                    |            |                               | G                      | 0.001392 | -6.43 | 66413      | 5725500.48 |
| PGN0881 | <i>AP endonuclease domain protein</i>                 |         |        |       |                        |                      |            |                               |                        |          |       |            |            |
| PG1405  | 0.173614                                              | 2.13    | 12     | -2.49 | 3.82                   | Y                    |            |                               | G                      | 0.000501 | -5.88 | 66413      | 3868732.23 |
| PGN0884 | <i>hypothetical protein PG_1405</i>                   |         |        |       |                        |                      |            |                               |                        |          |       |            |            |
| PG1407  | 0.751373                                              | 2.13    | 3      | -0.49 | 2.36                   | Y                    |            |                               | Y                      | 0.053629 | -1.30 | 66413      | 515156.975 |
| PGN0885 | <i>nitroimidazole resistance protein putative</i>     |         |        |       |                        |                      |            |                               |                        |          |       |            |            |
| PG1408  | 0.194509                                              | 9.6     | 10.5   | -0.13 | 4.33                   | Y                    |            |                               | Y                      | 0.116286 | -2.54 | 11582142   | 6892490    |
| PGN0886 | <i>heavy metal efflux pump CzcD family</i>            |         |        |       |                        |                      |            |                               |                        |          |       |            |            |
| PG1411  | 0.201724                                              | 7.46    | 16     | -1.1  | 4.55                   | Y                    |            |                               | Y                      | 0.018743 | -3.64 | 2934729    | 8272053.88 |
| PGN0889 | <i>potassium uptake protein TrkA putative</i>         |         |        |       |                        |                      |            |                               |                        |          |       |            |            |
| PG1414  | 0.000000                                              | 580.01  | 787    | -0.44 | 10.42                  | G                    |            |                               | Y                      | 0.050220 | -0.13 | 384631954  | 421114043  |
| PGN0890 | <i>hypothetical protein PG_1414</i>                   |         |        |       |                        |                      |            |                               |                        |          |       |            |            |
| PG1416  | 0.700541                                              | 170.59  | 159    | 0.1   | 8.36                   | Y                    |            |                               | Y                      | 0.059515 | -0.16 | 97579942.5 | 108819375  |
| PGN0891 | <i>fabK enoyl-(acyl-carrier-protein) reductase II</i> |         |        |       |                        |                      |            |                               |                        |          |       |            |            |
| PG1417  | 0.010588                                              | 259.08  | 199    | 0.38  | 8.84                   | Y                    |            |                               | Y                      | 0.032546 | 0.15  | 117753136  | 106263044  |
| PGN0893 | <i>fumB fumarate hydratase class I anaerobic</i>      |         |        |       |                        |                      |            |                               |                        |          |       |            |            |
| PG1418  | 0.779998                                              | 20.26   | 18.5   | 0.13  | 5.28                   | Y                    |            |                               | Y                      | 0.011880 | -0.44 | 5004032    | 6852551.5  |
| PGN0894 | <i>dnaX DNA polymerase III gamma and tau subunits</i> |         |        |       |                        |                      |            |                               |                        |          |       |            |            |
| PG1421  | 0.001098                                              | 38.38   | 17     | 1.17  | 5.79                   | R                    |            |                               | Y                      | 0.151909 | -0.03 | 13734869.5 | 14139549.1 |
| PGN0895 | <i>ferredoxin 4Fe-4S</i>                              |         |        |       |                        |                      |            |                               |                        |          |       |            |            |
| PG1422  | 0.102560                                              | 2.13    | 13     | -2.61 | 3.92                   | Y                    |            |                               | G                      | 0.000405 | -5.84 | 66413      | 3762199.9  |
| PGN0896 | <i>dacB D-alanyl-D-alanine carboxypeptidase</i>       |         |        |       |                        |                      |            |                               |                        |          |       |            |            |
| PG1424  | 0.000419                                              | 981.96  | 1116.5 | -0.19 | 11.04                  | G                    |            |                               | Y                      | 0.057050 | -0.07 | 1.2313e+09 | 1.2954e+09 |
| PGN0898 | <i>peptidylarginine deiminase</i>                     |         |        |       |                        |                      |            |                               |                        |          |       |            |            |
| PG1428  | 0.203808                                              | 2.13    | 11.5   | -2.43 | 3.77                   | Y                    |            |                               | G                      | 0.000202 | -6.71 | 66413      | 6872827.3  |
| PGN0901 | <i>ribH riboflavin synthase beta subunit</i>          |         |        |       |                        |                      |            |                               |                        |          |       |            |            |
| PG1430  | 0.700541                                              | 93.82   | 106    | -0.18 | 7.64                   | Y                    |            |                               | Y                      | 0.015947 | -0.32 | 129792532  | 161883241  |
| PGN0902 | <i>TPR domain protein</i>                             |         |        |       |                        |                      |            |                               |                        |          |       |            |            |
| PG1431  | 0.122734                                              | 10.66   | 12     | -0.17 | 4.5                    | Y                    |            |                               | Y                      | 0.011455 | -3.35 | 683501     | 2863172.6  |
| PGN0903 | <i>DNA-binding response regulator LuxR family</i>     |         |        |       |                        |                      |            |                               |                        |          |       |            |            |

| TIGR    | PgSgFn / Pg Spectral Count                                               |         |        |       |                        |                      | PgSgFn / Pg Protein Intensity |  |         |                        |        |            |            |
|---------|--------------------------------------------------------------------------|---------|--------|-------|------------------------|----------------------|-------------------------------|--|---------|------------------------|--------|------------|------------|
|         | PGN                                                                      | q-value | PgSgFn | Pg    | log <sub>2</sub> Ratio | log <sub>2</sub> Sum | Regulation                    |  | q-value | log <sub>2</sub> Ratio | PgSgFn | Pg         |            |
| PG1432  | 0.000023                                                                 | 2.13    | 24     | -3.49 | 4.71                   | Y                    |                               |  | G       | 0.001555               | -7.12  | 66413      | 9232851.25 |
| PGN0904 | <i>sensor histidine kinase</i>                                           |         |        |       |                        |                      |                               |  |         |                        |        |            |            |
| PG1065  | 0.000000                                                                 | 11.73   | 41     | -1.81 | 5.72                   | G                    |                               |  | Y       | 0.094130               | -3.86  | 10074142.5 | 15535299   |
| PGN0905 | <i>pyrD dihydroorotate dehydrogenase</i>                                 |         |        |       |                        |                      |                               |  |         |                        |        |            |            |
| PG1064  | 0.000000                                                                 | 8.53    | 54.5   | -2.68 | 5.98                   | G                    |                               |  | Y       | 0.014040               | -4.50  | 5506654.5  | 17953577.4 |
| PGN0906 | <i>dihydroorotate dehydrogenase putative</i>                             |         |        |       |                        |                      |                               |  |         |                        |        |            |            |
| PG1063  | 0.543202                                                                 | 2.13    | 9      | -2.08 | 3.48                   | Y                    |                               |  | Y       | 0.011880               | -5.43  | 66413      | 3098266.9  |
| PGN0907 | <i>transcriptional regulator putative</i>                                |         |        |       |                        |                      |                               |  |         |                        |        |            |            |
| PG1214  | 0.630045                                                                 | 2.13    | 8      | -1.91 | 3.34                   | Y                    |                               |  | Y       | 0.019902               | -4.94  | 66413      | 2407200.85 |
| PGN0910 | <i>hypothetical protein PG_1214</i>                                      |         |        |       |                        |                      |                               |  |         |                        |        |            |            |
| PG1213  | 0.400640                                                                 | 2.13    | 10     | -2.23 | 3.6                    | Y                    |                               |  | Y       | 0.038496               | -5.15  | 66413      | 3971301.43 |
| PGN0911 | <i>rnhA ribonuclease H</i>                                               |         |        |       |                        |                      |                               |  |         |                        |        |            |            |
| PG1212  | 0.118209                                                                 | 25.59   | 42.5   | -0.73 | 6.09                   | Y                    |                               |  | Y       | 0.027753               | -0.40  | 15294256.5 | 19930545.2 |
| PGN0912 | <i>TPR domain protein</i>                                                |         |        |       |                        |                      |                               |  |         |                        |        |            |            |
| PG1211  | 0.604563                                                                 | 2.13    | 4      | -0.91 | 2.62                   | Y                    |                               |  | Y       | 0.052108               | -2.55  | 66413      | 2841627.1  |
| PGN0913 | <i>hexapeptide transferase family protein</i>                            |         |        |       |                        |                      |                               |  |         |                        |        |            |            |
| PG1210  | 0.556958                                                                 | 601.33  | 599.5  | 0     | 10.23                  | Y                    |                               |  | G       | 0.008485               | -0.17  | 493265458  | 556661358  |
| PGN0914 | <i>peptidase M24 family</i>                                              |         |        |       |                        |                      |                               |  |         |                        |        |            |            |
| PG1209  | 0.771913                                                                 | 76.77   | 83     | -0.11 | 7.32                   | Y                    |                               |  | G       | 0.004244               | -0.29  | 35974515.5 | 44077339.1 |
| PGN0915 | <i>hypothetical protein PG_1209</i>                                      |         |        |       |                        |                      |                               |  |         |                        |        |            |            |
| PG1208  | 0.000000                                                                 | 633.32  | 484    | 0.39  | 10.13                  | R                    |                               |  | R       | 0.005157               | 0.25   | 452566348  | 381861529  |
| PGN0916 | <i>dnaK dnaK protein</i>                                                 |         |        |       |                        |                      |                               |  |         |                        |        |            |            |
| PG1189  | 0.134175                                                                 | 323.06  | 271.5  | 0.25  | 9.22                   | Y                    |                               |  | Y       | 0.099350               | -0.08  | 254292213  | 267832009  |
| PGN0935 | <i>hypothetical protein PG_1189</i>                                      |         |        |       |                        |                      |                               |  |         |                        |        |            |            |
| PG1190  | 0.423387                                                                 | 2.13    | 9.5    | -2.16 | 3.54                   | Y                    |                               |  | Y       | 0.017881               | -6.61  | 66413      | 7517930.65 |
| PGN0936 | <i>hprA glycerate dehydrogenase</i>                                      |         |        |       |                        |                      |                               |  |         |                        |        |            |            |
| PG1195  | 0.061251                                                                 | 7.46    | 18.5   | -1.31 | 4.7                    | Y                    |                               |  | Y       | 0.042801               | -3.43  | 2825941.5  | 6105097.15 |
| PGN0938 | <i>bioF-2 8-amino-7-oxononanoate synthase</i>                            |         |        |       |                        |                      |                               |  |         |                        |        |            |            |
| PG0992  | 0.584639                                                                 | 271.88  | 283.5  | -0.06 | 9.12                   | Y                    |                               |  | Y       | 0.157620               | 0.04   | 169480526  | 166238410  |
| PGN0962 | <i>thrS threonyl-tRNA synthetase</i>                                     |         |        |       |                        |                      |                               |  |         |                        |        |            |            |
| PG0991  | 0.620762                                                                 | 31.99   | 30.5   | 0.07  | 5.97                   | Y                    |                               |  | Y       | 0.014886               | -0.27  | 27529423   | 33052353.7 |
| PGN0963 | <i>infC translation initiation factor IF-3</i>                           |         |        |       |                        |                      |                               |  |         |                        |        |            |            |
| PG0989  | 0.091810                                                                 | 91.69   | 64     | 0.52  | 7.28                   | Y                    |                               |  | R       | 0.008263               | 0.70   | 68153035   | 42475717.4 |
| PGN0965 | <i>rplT ribosomal protein L20</i>                                        |         |        |       |                        |                      |                               |  |         |                        |        |            |            |
| PG0982  | 0.000032                                                                 | 10.66   | 34     | -1.67 | 5.48                   | G                    |                               |  | Y       | 0.041798               | -4.27  | 8393158    | 19212681.3 |
| PGN0972 | <i>TPR domain protein</i>                                                |         |        |       |                        |                      |                               |  |         |                        |        |            |            |
| PG0980  | 0.543202                                                                 | 2.13    | 9      | -2.08 | 3.48                   | Y                    |                               |  | Y       | 0.013850               | -4.18  | 66413      | 1318995.1  |
| PGN0973 | <i>hypothetical protein PG_0980</i>                                      |         |        |       |                        |                      |                               |  |         |                        |        |            |            |
| PG0978  | 0.021655                                                                 | 10.66   | 3      | 1.83  | 3.77                   | Y                    |                               |  | Y       | 0.193910               | 0.94   | 1027023    | 1026842    |
| PGN0974 | <i>aroE shikimate 5-dehydrogenase</i>                                    |         |        |       |                        |                      |                               |  |         |                        |        |            |            |
| PG0977  | 0.600049                                                                 | 2.13    | 8.5    | -2    | 3.41                   | Y                    |                               |  | G       | 0.007923               | -5.60  | 66413      | 3388627.18 |
| PGN0975 | <i>ubiE ubiquinone/menaquinone biosynthesis methyltransferase UbiE</i>   |         |        |       |                        |                      |                               |  |         |                        |        |            |            |
| PG0976  | 0.084508                                                                 | 118.35  | 87     | 0.44  | 7.68                   | Y                    |                               |  | G       | 0.009001               | -0.14  | 89572933.5 | 98466063.1 |
| PGN0976 | <i>phosphoribosylaminoimidazole-succinocarboxamide synthase putative</i> |         |        |       |                        |                      |                               |  |         |                        |        |            |            |
| PG0975  | 0.604563                                                                 | 2.13    | 4      | -0.91 | 2.62                   | Y                    |                               |  | Y       | 0.052108               | -2.39  | 66413      | 2270793.5  |
| PGN0977 | <i>PhoH family protein</i>                                               |         |        |       |                        |                      |                               |  |         |                        |        |            |            |
| PG0973  | 0.604563                                                                 | 2.13    | 4      | -0.91 | 2.62                   | Y                    |                               |  | Y       | 0.052108               | -2.03  | 66413      | 1384770.58 |
| PGN0980 | <i>alpha-12-mannosidase family protein</i>                               |         |        |       |                        |                      |                               |  |         |                        |        |            |            |

| TIGR    | PgSgFn / Pg Spectral Count                                             |         |        |       |                        |                      |            | PgSgFn / Pg Protein Intensity |                        |          |       |            |            |
|---------|------------------------------------------------------------------------|---------|--------|-------|------------------------|----------------------|------------|-------------------------------|------------------------|----------|-------|------------|------------|
|         | PGN                                                                    | q-value | PgSgFn | Pg    | log <sub>2</sub> Ratio | log <sub>2</sub> Sum | Regulation | q-value                       | log <sub>2</sub> Ratio | PgSgFn   | Pg    |            |            |
| PG0969  | 0.779998                                                               | 2.13    | 2.5    | -0.23 | 2.21                   | Y                    |            |                               | Y                      | 0.053939 | -1.24 | 66413      | 473251.925 |
| PGN0981 | <i>S-adenosylmethionine:tRNA ribosyltransferase-isomerase putative</i> |         |        |       |                        |                      |            |                               |                        |          |       |            |            |
| PG0968  | 0.400640                                                               | 2.13    | 10     | -2.23 | 3.6                    | Y                    |            |                               | G                      | 0.008766 | -5.44 | 66413      | 3036536.2  |
| PGN0982 | <i>mrr Mrr restriction system protein</i>                              |         |        |       |                        |                      |            |                               |                        |          |       |            |            |
| PG0965  | 0.584639                                                               | 18.13   | 26.5   | -0.55 | 5.48                   | Y                    |            |                               | Y                      | 0.055138 | -0.32 | 7595643.5  | 9551632.15 |
| PGN0984 | <i>phosphatidylserine decarboxylase-related protein</i>                |         |        |       |                        |                      |            |                               |                        |          |       |            |            |
| PG0962  | 0.007276                                                               | 81.03   | 115    | -0.51 | 7.61                   | G                    |            |                               | Y                      | 0.018791 | -0.65 | 46341427   | 71133568.5 |
| PGN0987 | <i>proS prolyl-tRNA synthetase</i>                                     |         |        |       |                        |                      |            |                               |                        |          |       |            |            |
| PG0960  | 0.751373                                                               | 2.13    | 3      | -0.49 | 2.36                   | Y                    |            |                               | Y                      | 0.052108 | -2.35 | 66413      | 2155144.4  |
| PGN0989 | <i>conserved hypothetical protein</i>                                  |         |        |       |                        |                      |            |                               |                        |          |       |            |            |
| PG0959  | 0.557702                                                               | 42.65   | 32.5   | 0.39  | 6.23                   | Y                    |            |                               | Y                      | 0.026150 | -0.56 | 18247372   | 26636653.7 |
| PGN0990 | <i>mrp ATP-binding protein Mrp/Nbp35 family</i>                        |         |        |       |                        |                      |            |                               |                        |          |       |            |            |
| PG0958  | 0.692989                                                               | 2.13    | 3.5    | -0.72 | 2.49                   | Y                    |            |                               | Y                      | 0.052108 | -2.41 | 66413      | 2352081.83 |
| PGN0991 | <i>ribonuclease BN putative</i>                                        |         |        |       |                        |                      |            |                               |                        |          |       |            |            |
| PG0957  | 0.667335                                                               | 2.13    | 8      | -1.91 | 3.34                   | Y                    |            |                               | G                      | 0.002081 | -6.27 | 66413      | 5138358.6  |
| PGN0992 | <i>ribF riboflavin biosynthesis protein RibF</i>                       |         |        |       |                        |                      |            |                               |                        |          |       |            |            |
| PG0956  | 0.779998                                                               | 2.13    | 2.5    | -0.23 | 2.21                   | Y                    |            |                               | Y                      | 0.053020 | -1.41 | 66413      | 598069.675 |
| PGN0993 | <i>peptidase M23/M37 family putative</i>                               |         |        |       |                        |                      |            |                               |                        |          |       |            |            |
| PG0955  | 0.346258                                                               | 14.93   | 25     | -0.74 | 5.32                   | Y                    |            |                               | Y                      | 0.138569 | -0.58 | 7792279.5  | 5868613.65 |
| PGN0994 | <i>hypothetical protein PG_0955</i>                                    |         |        |       |                        |                      |            |                               |                        |          |       |            |            |
| PG0954  | 0.108176                                                               | 9.6     | 18.5   | -0.95 | 4.81                   | Y                    |            |                               | Y                      | 0.019452 | -3.83 | 2453646    | 9094745.65 |
| PGN0996 | <i>TPR domain protein</i>                                              |         |        |       |                        |                      |            |                               |                        |          |       |            |            |
| PG0953  | 0.134175                                                               | 2.13    | 12.5   | -2.55 | 3.87                   | Y                    |            |                               | G                      | 0.000532 | -7.14 | 66413      | 9302678.5  |
| PGN0997 | <i>dut deoxyuridine 5'-triphosphate nucleotidohydrolase</i>            |         |        |       |                        |                      |            |                               |                        |          |       |            |            |
| PG0952  | 0.770505                                                               | 37.32   | 34.5   | 0.11  | 6.17                   | Y                    |            |                               | G                      | 0.007622 | -0.62 | 11877208   | 18409027.8 |
| PGN0998 | <i>ispG 1-hydroxy-2-methyl-2-(E)-butenyl 4-diphosphate synthase</i>    |         |        |       |                        |                      |            |                               |                        |          |       |            |            |
| PG0951  | 0.089835                                                               | 39.45   | 58     | -0.56 | 6.61                   | Y                    |            |                               | Y                      | 0.034467 | -0.73 | 24374430   | 37065505.6 |
| PGN0999 | <i>purE phosphoribosylaminoimidazole carboxylase PurE protein</i>      |         |        |       |                        |                      |            |                               |                        |          |       |            |            |
| PG0950  | 0.000086                                                               | 108.75  | 61.5   | 0.82  | 7.41                   | R                    |            |                               | R                      | 0.009001 | 0.84  | 112255992  | 62210921.2 |
| PGN1000 | <i>gcvH glycine cleavage system H protein</i>                          |         |        |       |                        |                      |            |                               |                        |          |       |            |            |
| PG0949  | 0.784897                                                               | 2.13    | 5.5    | -1.37 | 2.93                   | Y                    |            |                               | Y                      | 0.013019 | -4.27 | 66413      | 1398010.73 |
| PGN1001 | <i>conserved hypothetical protein</i>                                  |         |        |       |                        |                      |            |                               |                        |          |       |            |            |
| PG0948  | 0.039315                                                               | 14.93   | 7.5    | 0.99  | 4.49                   | Y                    |            |                               | Y                      | 0.129674 | -1.76 | 3921185    | 2641016.23 |
| PGN1002 | <i>AMP nucleosidase putative</i>                                       |         |        |       |                        |                      |            |                               |                        |          |       |            |            |
| PG0946  | 0.779998                                                               | 28.79   | 28     | 0.04  | 5.83                   | Y                    |            |                               | Y                      | 0.115558 | -0.07 | 26987424.5 | 28487792   |
| PGN1004 | <i>ABC transporter ATP-binding protein</i>                             |         |        |       |                        |                      |            |                               |                        |          |       |            |            |
| PG0945  | 0.483206                                                               | 38.38   | 44.5   | -0.21 | 6.37                   | Y                    |            |                               | Y                      | 0.170519 | -0.09 | 36520670.5 | 37685636.8 |
| PGN1005 | <i>ABC transporter permease protein putative</i>                       |         |        |       |                        |                      |            |                               |                        |          |       |            |            |
| PG0938  | 0.779998                                                               | 2.13    | 2.5    | -0.23 | 2.21                   | Y                    |            |                               | Y                      | 0.052842 | -1.50 | 66413      | 672041.375 |
| PGN1009 | <i>calcium-transporting ATPase</i>                                     |         |        |       |                        |                      |            |                               |                        |          |       |            |            |
| PG0937  | 0.029147                                                               | 66.1    | 40     | 0.72  | 6.73                   | Y                    |            |                               | R                      | 0.002521 | 0.80  | 43572376   | 24992891.5 |
| PGN1010 | <i>hypothetical protein PG_0937</i>                                    |         |        |       |                        |                      |            |                               |                        |          |       |            |            |
| PG0936  | 0.542387                                                               | 8.53    | 7      | 0.29  | 3.96                   | Y                    |            |                               | Y                      | 0.046188 | -3.77 | 3806837    | 12511851.5 |
| PGN1011 | <i>xanthine/uracil permease family protein</i>                         |         |        |       |                        |                      |            |                               |                        |          |       |            |            |
| PG0935  | 0.751373                                                               | 2.13    | 3      | -0.49 | 2.36                   | Y                    |            |                               | Y                      | 0.052108 | -1.76 | 66413      | 956026.5   |
| PGN1012 | <i>ispE 4-diphosphocytidyl-2C-methyl-D-erythritol kinase</i>           |         |        |       |                        |                      |            |                               |                        |          |       |            |            |
| PG0933  | 0.000000                                                               | 1643    | 1363   | 0.27  | 11.55                  | R                    |            |                               | Y                      | 0.127626 | 0.02  | 1.5061e+09 | 1.4879e+09 |
| PGN1014 | <i>translation elongation factor G putative</i>                        |         |        |       |                        |                      |            |                               |                        |          |       |            |            |

| TIGR    | PgSgFn / Pg Spectral Count                                           |         |        |       |                        |                      | PgSgFn / Pg Protein Intensity |  |   |          |                        |            |            |
|---------|----------------------------------------------------------------------|---------|--------|-------|------------------------|----------------------|-------------------------------|--|---|----------|------------------------|------------|------------|
|         | PGN                                                                  | q-value | PgSgFn | Pg    | log <sub>2</sub> Ratio | log <sub>2</sub> Sum | Regulation                    |  |   | q-value  | log <sub>2</sub> Ratio | PgSgFn     | Pg         |
| PG0932  | 0.102059                                                             | 10.66   | 18.5   | -0.8  | 4.87                   | Y                    |                               |  | Y | 0.062174 | -2.87                  | 2207452.5  | 5116538.38 |
| PGN1015 | <i>DNA polymerase III delta prime subunit putative</i>               |         |        |       |                        |                      |                               |  |   |          |                        |            |            |
| PG0928  | 0.639746                                                             | 110.88  | 126    | -0.18 | 7.89                   | Y                    |                               |  | Y | 0.038811 | -0.26                  | 75065764   | 88694803.1 |
| PGN1019 | <i>response regulator</i>                                            |         |        |       |                        |                      |                               |  |   |          |                        |            |            |
| PG0924  | 0.014718                                                             | 2.13    | 16     | -2.91 | 4.18                   | Y                    |                               |  | G | 0.001039 | -6.37                  | 66413      | 5480082.08 |
| PGN1023 | <i>5'-nucleotidase lipoprotein e(P4) family</i>                      |         |        |       |                        |                      |                               |  |   |          |                        |            |            |
| PG0923  | 0.770282                                                             | 23.46   | 19     | 0.3   | 5.41                   | Y                    |                               |  | Y | 0.014081 | 0.67                   | 20451408   | 12686598.4 |
| PGN1024 | <i>rbfA ribosome-binding factor A</i>                                |         |        |       |                        |                      |                               |  |   |          |                        |            |            |
| PG0920  | 0.000000                                                             | 2.13    | 42.5   | -4.32 | 5.48                   | Y                    |                               |  | G | 0.000986 | -7.36                  | 66413      | 10846646.6 |
| PGN1026 | <i>glycosyl transferase group 2 family protein</i>                   |         |        |       |                        |                      |                               |  |   |          |                        |            |            |
| PG0919  | 0.000188                                                             | 23.46   | 53     | -1.18 | 6.26                   | G                    |                               |  | G | 0.001582 | -1.13                  | 10737889.5 | 23193936.3 |
| PGN1027 | <i>pyrC dihydroorotase</i>                                           |         |        |       |                        |                      |                               |  |   |          |                        |            |            |
| PG0918  | 0.543202                                                             | 2.13    | 9      | -2.08 | 3.48                   | Y                    |                               |  | Y | 0.014536 | -5.25                  | 66413      | 2817060    |
| PGN1028 | <i>hypothetical protein PG_0918</i>                                  |         |        |       |                        |                      |                               |  |   |          |                        |            |            |
| PG0914  | 0.014629                                                             | 2.13    | 16     | -2.91 | 4.18                   | Y                    |                               |  | G | 0.001540 | -7.20                  | 66413      | 9718261.65 |
| PGN1032 | <i>hypothetical protein PG_0914</i>                                  |         |        |       |                        |                      |                               |  |   |          |                        |            |            |
| PG0912  | 0.600049                                                             | 2.13    | 4      | -0.91 | 2.62                   | Y                    |                               |  | Y | 0.052108 | -1.91                  | 66413      | 1543373    |
| PGN1033 | <i>polysaccharide transport protein putative</i>                     |         |        |       |                        |                      |                               |  |   |          |                        |            |            |
| PG0910  | 0.685422                                                             | 2.13    | 3.5    | -0.72 | 2.49                   | Y                    |                               |  | Y | 0.052147 | -1.57                  | 66413      | 965817     |
| PGN1034 | <i>FHA domain protein</i>                                            |         |        |       |                        |                      |                               |  |   |          |                        |            |            |
| PG0909  | 0.000015                                                             | 9.6     | 34.5   | -1.85 | 5.46                   | G                    |                               |  | G | 0.009741 | -4.40                  | 3519746    | 15716969.7 |
| PGN1035 | <i>conserved hypothetical protein</i>                                |         |        |       |                        |                      |                               |  |   |          |                        |            |            |
| PG0906  | 0.000000                                                             | 81.03   | 23     | 1.82  | 6.7                    | R                    |                               |  | R | 0.003547 | 1.32                   | 178298385  | 71494042.4 |
| PGN1037 | <i>lipoprotein putative</i>                                          |         |        |       |                        |                      |                               |  |   |          |                        |            |            |
| PG0903  | 0.250677                                                             | 11.73   | 14     | -0.26 | 4.69                   | Y                    |                               |  | Y | 0.050595 | -3.64                  | 5807400.5  | 11711224.4 |
| PGN1038 | <i>conserved hypothetical protein</i>                                |         |        |       |                        |                      |                               |  |   |          |                        |            |            |
| PG0900  | 0.685422                                                             | 2.13    | 3.5    | -0.72 | 2.49                   | Y                    |                               |  | Y | 0.052108 | -1.72                  | 66413      | 1185331.5  |
| PGN1041 | <i>cydA cytochrome d ubiquinol oxidase subunit I</i>                 |         |        |       |                        |                      |                               |  |   |          |                        |            |            |
| PG0899  | 0.608229                                                             | 2.13    | 8.5    | -2    | 3.41                   | Y                    |                               |  | Y | 0.018743 | -2.37                  | 66413      | 380729.5   |
| PGN1042 | <i>cydB cytochrome d ubiquinol oxidase subunit II</i>                |         |        |       |                        |                      |                               |  |   |          |                        |            |            |
| PG0898  | 0.336653                                                             | 2.13    | 10.5   | -2.3  | 3.66                   | Y                    |                               |  | G | 0.000107 | -6.24                  | 66413      | 4960338.25 |
| PGN1043 | <i>conserved hypothetical protein</i>                                |         |        |       |                        |                      |                               |  |   |          |                        |            |            |
| PG0897  | 0.604563                                                             | 2.13    | 4      | -0.91 | 2.62                   | Y                    |                               |  | Y | 0.063017 | -0.69                  | 66413      | 226326     |
| PGN1044 | <i>alpha-amylase family protein</i>                                  |         |        |       |                        |                      |                               |  |   |          |                        |            |            |
| PG0894  | 0.017364                                                             | 8.53    | 3      | 1.51  | 3.53                   | Y                    |                               |  | Y | 0.056249 | 1.89                   | 897296     | 149871.45  |
| PGN1046 | <i>radC DNA repair protein RadC</i>                                  |         |        |       |                        |                      |                               |  |   |          |                        |            |            |
| PG0890  | 0.201724                                                             | 157.8   | 188.5  | -0.26 | 8.44                   | Y                    |                               |  | G | 0.007304 | -0.58                  | 98366496   | 146850067  |
| PGN1049 | <i>alkaline phosphatase putative</i>                                 |         |        |       |                        |                      |                               |  |   |          |                        |            |            |
| PG0889  | 0.627286                                                             | 30.92   | 37     | -0.26 | 6.09                   | Y                    |                               |  | Y | 0.013957 | -0.71                  | 15293668   | 24973847.1 |
| PGN1050 | <i>peptidase M24 family</i>                                          |         |        |       |                        |                      |                               |  |   |          |                        |            |            |
| PG0886  | 0.457936                                                             | 2.13    | 9.5    | -2.16 | 3.54                   | Y                    |                               |  | G | 0.000670 | -5.37                  | 66413      | 2726739.23 |
| PGN1052 | <i>hypothetical protein PG_0886</i>                                  |         |        |       |                        |                      |                               |  |   |          |                        |            |            |
| PG0885  | 0.000000                                                             | 2.13    | 34.5   | -4.02 | 5.19                   | Y                    |                               |  | G | 0.000770 | -6.84                  | 66413      | 7537068.63 |
| PGN1053 | <i>phospho-2-dehydro-3-deoxyheptonate aldolase/chorismate mutase</i> |         |        |       |                        |                      |                               |  |   |          |                        |            |            |
| PG0884  | 0.423387                                                             | 2.13    | 9.5    | -2.16 | 3.54                   | Y                    |                               |  | G | 0.001865 | -4.85                  | 66413      | 1917166.35 |
| PGN1054 | <i>hypothetical protein PG_0884</i>                                  |         |        |       |                        |                      |                               |  |   |          |                        |            |            |
| PG0883  | 0.246190                                                             | 7.46    | 14     | -0.91 | 4.42                   | Y                    |                               |  | Y | 0.018904 | -3.34                  | 1192147    | 3772053.85 |
| PGN1055 | <i>hypothetical protein PG_0883</i>                                  |         |        |       |                        |                      |                               |  |   |          |                        |            |            |

| TIGR    | PgSgFn / Pg Spectral Count                                     |         |        |       |                        |                      |            | PgSgFn / Pg Protein Intensity |                        |          |       |            |            |
|---------|----------------------------------------------------------------|---------|--------|-------|------------------------|----------------------|------------|-------------------------------|------------------------|----------|-------|------------|------------|
|         | PGN                                                            | q-value | PgSgFn | Pg    | log <sub>2</sub> Ratio | log <sub>2</sub> Sum | Regulation | q-value                       | log <sub>2</sub> Ratio | PgSgFn   | Pg    |            |            |
| PG0881  | 0.002122                                                       | 173.79  | 232.5  | -0.42 | 8.67                   | G                    |            |                               | Y                      | 0.170519 | 0.04  | 150443196  | 147736133  |
| PGN1057 | <i>recA recA protein</i>                                       |         |        |       |                        |                      |            |                               |                        |          |       |            |            |
| PG0880  | 0.786857                                                       | 26.65   | 27.5   | -0.05 | 5.76                   | Y                    |            |                               | Y                      | 0.134333 | -0.13 | 13621843.5 | 14594895.9 |
| PGN1058 | <i>bcp bacterioferritin comigratory protein</i>                |         |        |       |                        |                      |            |                               |                        |          |       |            |            |
| PG0877  | 0.751373                                                       | 2.13    | 3      | -0.49 | 2.36                   | Y                    |            |                               | Y                      | 0.052108 | -3.36 | 66413      | 11415687.5 |
| PGN1061 | <i>hypothetical protein PG_0877</i>                            |         |        |       |                        |                      |            |                               |                        |          |       |            |            |
| PG0876  | 0.003155                                                       | 2.13    | 18     | -3.08 | 4.33                   | Y                    |            |                               | G                      | 0.004701 | -6.16 | 66413      | 4837485.98 |
| PGN1062 | <i>thdF thiophene and furan oxidation protein ThdF</i>         |         |        |       |                        |                      |            |                               |                        |          |       |            |            |
| PG2119  | 0.000000                                                       | 2.13    | 36     | -4.08 | 5.25                   | Y                    |            |                               | G                      | 0.006764 | -8.35 | 66413      | 22495039.5 |
| PGN1068 | <i>oxidoreductase Gfo/Iah/MocA family</i>                      |         |        |       |                        |                      |            |                               |                        |          |       |            |            |
| PG1288  | 0.486470                                                       | 42.65   | 56     | -0.39 | 6.62                   | Y                    |            |                               | Y                      | 0.125479 | -0.30 | 43986317   | 51066800.3 |
| PGN1078 | <i>gmd GDP-mannose 46-dehydratase</i>                          |         |        |       |                        |                      |            |                               |                        |          |       |            |            |
| PG1289  | 0.000746                                                       | 11.73   | 30     | -1.35 | 5.38                   | G                    |            |                               | G                      | 0.000238 | -5.37 | 578959     | 11865696.6 |
| PGN1079 | <i>fcl GDP-fucose synthetase</i>                               |         |        |       |                        |                      |            |                               |                        |          |       |            |            |
| PG1290  | 0.000003                                                       | 987.29  | 1172.5 | -0.25 | 11.08                  | G                    |            |                               | G                      | 0.001449 | -0.24 | 908683287  | 1.0702e+09 |
| PGN1080 | <i>ilvE branched-chain amino acid aminotransferase</i>         |         |        |       |                        |                      |            |                               |                        |          |       |            |            |
| PG1291  | 0.687127                                                       | 29.85   | 36     | -0.27 | 6.04                   | Y                    |            |                               | Y                      | 0.143269 | -0.01 | 17319184   | 17511025.5 |
| PGN1081 | <i>hypothetical protein PG_1291</i>                            |         |        |       |                        |                      |            |                               |                        |          |       |            |            |
| PG1294  | 0.659176                                                       | 36.25   | 45.5   | -0.33 | 6.35                   | Y                    |            |                               | Y                      | 0.116286 | -0.10 | 15099444.5 | 16009417.8 |
| PGN1085 | <i>feoB-2 ferrous iron transport protein B</i>                 |         |        |       |                        |                      |            |                               |                        |          |       |            |            |
| PG1296  | 0.659176                                                       | 2.13    | 8      | -1.91 | 3.34                   | Y                    |            |                               | G                      | 0.006461 | -5.64 | 66413      | 3429830.45 |
| PGN1087 | <i>hypothetical protein PG_1296</i>                            |         |        |       |                        |                      |            |                               |                        |          |       |            |            |
| PG1297  | 0.001760                                                       | 548.02  | 480.5  | 0.19  | 10.01                  | R                    |            |                               | Y                      | 0.178380 | -0.01 | 503860624  | 507873671  |
| PGN1088 | <i>rpsA ribosomal protein S1</i>                               |         |        |       |                        |                      |            |                               |                        |          |       |            |            |
| PG1300  | 0.403113                                                       | 2.13    | 10     | -2.23 | 3.6                    | Y                    |            |                               | Y                      | 0.019334 | -2.30 | 66413      | 362616.35  |
| PGN1089 | <i>conserved hypothetical protein</i>                          |         |        |       |                        |                      |            |                               |                        |          |       |            |            |
| PG1302  | 0.064532                                                       | 218.57  | 173    | 0.34  | 8.61                   | Y                    |            |                               | G                      | 0.009931 | -0.15 | 302782184  | 334996553  |
| PGN1091 | <i>hypothetical protein PG_1302</i>                            |         |        |       |                        |                      |            |                               |                        |          |       |            |            |
| PG1304  | 0.600049                                                       | 21.32   | 19     | 0.17  | 5.33                   | Y                    |            |                               | Y                      | 0.052192 | 1.01  | 8335892    | 3282121.8  |
| PGN1093 | <i>hypothetical protein PG_1304</i>                            |         |        |       |                        |                      |            |                               |                        |          |       |            |            |
| PG1305  | 0.000417                                                       | 762.32  | 642    | 0.25  | 10.46                  | R                    |            |                               | G                      | 0.006544 | -0.29 | 719204440  | 879828428  |
| PGN1094 | <i>gcvP glycine cleavage system P protein</i>                  |         |        |       |                        |                      |            |                               |                        |          |       |            |            |
| PG1306  | 0.751373                                                       | 2.13    | 3      | -0.49 | 2.36                   | Y                    |            |                               | Y                      | 0.052108 | -2.10 | 66413      | 1530352.53 |
| PGN1095 | <i>metallo-beta-lactamase family protein</i>                   |         |        |       |                        |                      |            |                               |                        |          |       |            |            |
| PG1307  | 0.013571                                                       | 2.13    | 15.5   | -2.86 | 4.14                   | Y                    |            |                               | G                      | 0.000602 | -6.24 | 66413      | 4985773.13 |
| PGN1096 | <i>gidB glucose-inhibited division protein B</i>               |         |        |       |                        |                      |            |                               |                        |          |       |            |            |
| PG1308  | 0.262727                                                       | 30.92   | 42     | -0.44 | 6.19                   | Y                    |            |                               | G                      | 0.003984 | -0.30 | 12577367   | 15487200.1 |
| PGN1097 | <i>hypothetical protein PG_1308</i>                            |         |        |       |                        |                      |            |                               |                        |          |       |            |            |
| PG1310  | 0.784897                                                       | 2.13    | 5.5    | -1.37 | 2.93                   | Y                    |            |                               | G                      | 0.001895 | -5.33 | 66413      | 2682120.18 |
| PGN1098 | <i>exsB protein</i>                                            |         |        |       |                        |                      |            |                               |                        |          |       |            |            |
| PG1311  | 0.784897                                                       | 2.13    | 5.5    | -1.37 | 2.93                   | Y                    |            |                               | G                      | 0.007874 | -3.79 | 66413      | 956828     |
| PGN1099 | <i>conserved hypothetical protein</i>                          |         |        |       |                        |                      |            |                               |                        |          |       |            |            |
| PG1313  | 0.000000                                                       | 286.8   | 462    | -0.69 | 9.55                   | G                    |            |                               | Y                      | 0.047737 | -0.09 | 363300507  | 385514802  |
| PGN1103 | <i>dipeptidase-related protein</i>                             |         |        |       |                        |                      |            |                               |                        |          |       |            |            |
| PG1314  | 0.751373                                                       | 2.13    | 3      | -0.49 | 2.36                   | Y                    |            |                               | Y                      | 0.052485 | -1.47 | 66413      | 839419.5   |
| PGN1104 | <i>aroC chorismate synthase</i>                                |         |        |       |                        |                      |            |                               |                        |          |       |            |            |
| PG1315  | 0.003657                                                       | 87.43   | 100.5  | -0.2  | 7.55                   | G                    |            |                               | G                      | 0.004349 | -0.71 | 58987496.5 | 96993805   |
| PGN1105 | <i>slyD peptidyl-prolyl cis-trans isomerase SlyD FKBP-type</i> |         |        |       |                        |                      |            |                               |                        |          |       |            |            |



| TIGR    | PgSgFn / Pg Spectral Count                                     |        |       |                        |                      |            | PgSgFn / Pg Protein Intensity |                        |            |            |  |  |
|---------|----------------------------------------------------------------|--------|-------|------------------------|----------------------|------------|-------------------------------|------------------------|------------|------------|--|--|
|         | q-value                                                        | PgSgFn | Pg    | log <sub>2</sub> Ratio | log <sub>2</sub> Sum | Regulation | q-value                       | log <sub>2</sub> Ratio | PgSgFn     | Pg         |  |  |
| PG1317  | 0.225676                                                       | 2.13   | 6     | -1.49                  | 3.02                 | Y ●● Y     | 0.083272                      | -0.16                  | 66413      | 143841.5   |  |  |
| PGN1107 | <i>hypothetical protein PG_1317</i>                            |        |       |                        |                      |            |                               |                        |            |            |  |  |
| PG1318  | 0.779998                                                       | 2.13   | 2.5   | -0.23                  | 2.21                 | Y ●● Y     | 0.052108                      | -2.01                  | 66413      | 1760533    |  |  |
| PGN1108 | <i>RNA polymerase sigma-70 factor ECF subfamily</i>            |        |       |                        |                      |            |                               |                        |            |            |  |  |
| PG1321  | 0.000000                                                       | 830.56 | 387.5 | 1.1                    | 10.25                | R ●● R     | 0.001053                      | 0.35                   | 283146008  | 221867547  |  |  |
| PGN1111 | <i>fhs formate--tetrahydrofolate ligase</i>                    |        |       |                        |                      |            |                               |                        |            |            |  |  |
| PG1323  | 0.000000                                                       | 249.49 | 142.5 | 0.81                   | 8.61                 | R ●● Y     | 0.015038                      | 0.35                   | 149744341  | 117348989  |  |  |
| PGN1112 | <i>PhoH family protein</i>                                     |        |       |                        |                      |            |                               |                        |            |            |  |  |
| PG1325  | 0.111805                                                       | 10.66  | 12    | -0.17                  | 4.5                  | Y ●● Y     | 0.102207                      | -1.83                  | 675197     | 1010994.5  |  |  |
| PGN1114 | <i>hypothetical protein PG_1325</i>                            |        |       |                        |                      |            |                               |                        |            |            |  |  |
| PG1326  | 0.358444                                                       | 6.4    | 12.5  | -0.97                  | 4.24                 | Y ●● Y     | 0.069876                      | -3.77                  | 7060092    | 12212055.3 |  |  |
| PGN1115 | <i>hemagglutinin putative</i>                                  |        |       |                        |                      |            |                               |                        |            |            |  |  |
| PG1327  | 0.295572                                                       | 458.46 | 410.5 | 0.16                   | 9.76                 | Y ●● Y     | 0.019334                      | -0.35                  | 345527990  | 435999988  |  |  |
| PGN1116 | <i>aminotransferase putative</i>                               |        |       |                        |                      |            |                               |                        |            |            |  |  |
| PG1328  | 0.000015                                                       | 364.64 | 470.5 | -0.37                  | 9.71                 | G ●● Y     | 0.115558                      | -0.05                  | 244013478  | 252557097  |  |  |
| PGN1117 | <i>CoA ligase family protein</i>                               |        |       |                        |                      |            |                               |                        |            |            |  |  |
| PG1330  | 0.000000                                                       | 2.13   | 49    | -4.52                  | 5.68                 | Y ●● G     | 0.000137                      | -9.41                  | 66413      | 44792325.5 |  |  |
| PGN1119 | <i>mscL large conductance mechanosensitive channel protein</i> |        |       |                        |                      |            |                               |                        |            |            |  |  |
| PG1332  | 0.268678                                                       | 59.71  | 42    | 0.51                   | 6.67                 | Y ●● Y     | 0.031171                      | 0.62                   | 50661605.5 | 31964946.5 |  |  |
| PGN1122 | <i>pntB NAD(P) transhydrogenase beta subunit</i>               |        |       |                        |                      |            |                               |                        |            |            |  |  |
| PG1333  | 0.608229                                                       | 2.13   | 8.5   | -2                     | 3.41                 | Y ●● G     | 0.000107                      | -5.19                  | 66413      | 2403697.9  |  |  |
| PGN1123 | <i>hypothetical protein PG_1333</i>                            |        |       |                        |                      |            |                               |                        |            |            |  |  |
| PG1334  | 0.659176                                                       | 183.38 | 165   | 0.15                   | 8.44                 | Y ●● G     | 0.000844                      | -0.15                  | 84409401   | 93349815   |  |  |
| PGN1124 | <i>band 7/Mec-2 family protein</i>                             |        |       |                        |                      |            |                               |                        |            |            |  |  |
| PG1335  | 0.630464                                                       | 29.85  | 22.5  | 0.41                   | 5.71                 | Y ●● Y     | 0.052108                      | -0.18                  | 28893674   | 32888584   |  |  |
| PGN1125 | <i>membrane protein putative</i>                               |        |       |                        |                      |            |                               |                        |            |            |  |  |
| PG1340  | 0.274290                                                       | 2.13   | 11    | -2.37                  | 3.71                 | Y ●● G     | 0.000986                      | -7.15                  | 66413      | 9377922.63 |  |  |
| PGN1128 | <i>L-lactate permease</i>                                      |        |       |                        |                      |            |                               |                        |            |            |  |  |
| PG1341  | 0.000000                                                       | 349.71 | 146.5 | 1.26                   | 8.95                 | R ●● R     | 0.003984                      | 0.39                   | 610086858  | 467010261  |  |  |
| PGN1129 | <i>hypothetical protein PG_1341</i>                            |        |       |                        |                      |            |                               |                        |            |            |  |  |
| PG1342  | 0.667335                                                       | 2.13   | 8     | -1.91                  | 3.34                 | Y ●● G     | 0.000240                      | -5.96                  | 66413      | 4084969.3  |  |  |
| PGN1130 | <i>murB UDP-N-acetylenolpyruvoylglucosamine reductase</i>      |        |       |                        |                      |            |                               |                        |            |            |  |  |
| PG1343  | 0.102154                                                       | 2.13   | 13    | -2.61                  | 3.92                 | Y ●● Y     | 0.014353                      | -4.63                  | 66413      | 1822692.25 |  |  |
| PGN1131 | <i>lipB lipoate-protein ligase B</i>                           |        |       |                        |                      |            |                               |                        |            |            |  |  |
| PG1345  | 0.014629                                                       | 2.13   | 16    | -2.91                  | 4.18                 | Y ●● G     | 0.002909                      | -6.43                  | 66413      | 5781385.75 |  |  |
| PGN1134 | <i>glycosyl transferase group 1 family protein</i>             |        |       |                        |                      |            |                               |                        |            |            |  |  |
| PG1346  | 0.600049                                                       | 2.13   | 4     | -0.91                  | 2.62                 | Y ●● Y     | 0.052108                      | -1.69                  | 66413      | 1127975.5  |  |  |
| PGN1135 | <i>glycosyl transferase group 1 family protein</i>             |        |       |                        |                      |            |                               |                        |            |            |  |  |
| PG1347  | 0.009829                                                       | 7.46   | 23    | -1.62                  | 4.93                 | G ●● G     | 0.009241                      | -4.33                  | 4496819    | 16558067   |  |  |
| PGN1136 | <i>conserved hypothetical protein</i>                          |        |       |                        |                      |            |                               |                        |            |            |  |  |
| PG1348  | 0.050334                                                       | 2.13   | 14    | -2.72                  | 4.01                 | Y ●● G     | 0.003885                      | -8.02                  | 66413      | 17538637.4 |  |  |
| PGN1137 | <i>conserved hypothetical protein TIGR00147</i>                |        |       |                        |                      |            |                               |                        |            |            |  |  |
| PG1351  | 0.785443                                                       | 2.13   | 5     | -1.23                  | 2.83                 | Y ●● G     | 0.002953                      | -5.05                  | 66413      | 2213652.2  |  |  |
| PGN1138 | <i>hypothetical protein PG_1351</i>                            |        |       |                        |                      |            |                               |                        |            |            |  |  |
| PG1352  | 0.667335                                                       | 19.19  | 22    | -0.2                   | 5.36                 | Y ●● Y     | 0.013019                      | -0.84                  | 8660602.5  | 15658701.7 |  |  |
| PGN1139 | <i>hypothetical protein PG_1352</i>                            |        |       |                        |                      |            |                               |                        |            |            |  |  |
| PG1353  | 0.000000                                                       | 275.08 | 148.5 | 0.89                   | 8.73                 | R ●● R     | 0.000484                      | 1.08                   | 220405827  | 104151658  |  |  |
| PGN1140 | <i>pyrE orotate phosphoribosyltransferase</i>                  |        |       |                        |                      |            |                               |                        |            |            |  |  |

| TIGR    | PgSgFn / Pg Spectral Count                                    |         |        |       |                        |                      | PgSgFn / Pg Protein Intensity |  |   |          |                        |            |            |
|---------|---------------------------------------------------------------|---------|--------|-------|------------------------|----------------------|-------------------------------|--|---|----------|------------------------|------------|------------|
|         | PGN                                                           | q-value | PgSgFn | Pg    | log <sub>2</sub> Ratio | log <sub>2</sub> Sum | Regulation                    |  |   | q-value  | log <sub>2</sub> Ratio | PgSgFn     | Pg         |
| PG1354  | 0.040076                                                      | 2.13    | 14.5   | -2.77 | 4.06                   | Y                    |                               |  | Y | 0.021356 | -6.65                  | 66413      | 8070274.23 |
| PGN1141 | <i>hydrolase carbon-nitrogen family</i>                       |         |        |       |                        |                      |                               |  |   |          |                        |            |            |
| PG1355  | 0.773021                                                      | 2.13    | 6.5    | -1.61 | 3.11                   | Y                    |                               |  | G | 0.002484 | -4.42                  | 66413      | 1427814.3  |
| PGN1142 | <i>acyltransferase putative</i>                               |         |        |       |                        |                      |                               |  |   |          |                        |            |            |
| PG1356  | 0.699805                                                      | 101.29  | 113.5  | -0.16 | 7.75                   | Y                    |                               |  | Y | 0.090202 | -0.13                  | 62792796.5 | 68109291.7 |
| PGN1143 | <i>hypothetical protein PG_1356</i>                           |         |        |       |                        |                      |                               |  |   |          |                        |            |            |
| PG1360  | 0.659176                                                      | 123.68  | 134    | -0.12 | 8.01                   | Y                    |                               |  | Y | 0.062627 | -0.18                  | 110758065  | 125086175  |
| PGN1148 | <i>purD phosphoribosylamine--glycine ligase</i>               |         |        |       |                        |                      |                               |  |   |          |                        |            |            |
| PG1361  | 0.284765                                                      | 233.5   | 264.5  | -0.18 | 8.96                   | Y                    |                               |  | Y | 0.026295 | -0.25                  | 152036286  | 180880040  |
| PGN1149 | <i>dipeptidyl aminopeptidase IV putative</i>                  |         |        |       |                        |                      |                               |  |   |          |                        |            |            |
| PG1362  | 0.000512                                                      | 22.39   | 46.5   | -1.05 | 6.11                   | G                    |                               |  | G | 0.009620 | -1.03                  | 9265715.5  | 19214108.1 |
| PGN1150 | <i>conserved hypothetical protein</i>                         |         |        |       |                        |                      |                               |  |   |          |                        |            |            |
| PG1364  | 0.548692                                                      | 30.92   | 21.5   | 0.52  | 5.71                   | Y                    |                               |  | Y | 0.023889 | -0.94                  | 7684901.5  | 15503143.6 |
| PGN1151 | <i>dxr 1-deoxy-D-xylulose 5-phosphate reductoisomerase</i>    |         |        |       |                        |                      |                               |  |   |          |                        |            |            |
| PG1365  | 0.751373                                                      | 2.13    | 3      | -0.49 | 2.36                   | Y                    |                               |  | Y | 0.052108 | -1.71                  | 66413      | 1167431    |
| PGN1152 | <i>16S rRNA processing protein RimM putative</i>              |         |        |       |                        |                      |                               |  |   |          |                        |            |            |
| PG1366  | 0.169098                                                      | 141.8   | 164    | -0.21 | 8.26                   | Y                    |                               |  | G | 0.000803 | -0.65                  | 32635361   | 51082156.6 |
| PGN1153 | <i>murA UDP-N-acetylglucosamine 1-carboxyvinyltransferase</i> |         |        |       |                        |                      |                               |  |   |          |                        |            |            |
| PG1367  | 0.028897                                                      | 7.46    | 21     | -1.49 | 4.83                   | Y                    |                               |  | G | 0.009727 | -3.96                  | 2829952.5  | 10156123.6 |
| PGN1154 | <i>hypothetical protein PG_1367</i>                           |         |        |       |                        |                      |                               |  |   |          |                        |            |            |
| PG1368  | 0.003827                                                      | 52.24   | 85.5   | -0.71 | 7.11                   | G                    |                               |  | G | 0.004329 | -0.61                  | 18710557   | 28638528.9 |
| PGN1155 | <i>pgi glucose-6-phosphate isomerase</i>                      |         |        |       |                        |                      |                               |  |   |          |                        |            |            |
| PG1369  | 0.000000                                                      | 2.13    | 28.5   | -3.74 | 4.94                   | Y                    |                               |  | G | 0.002493 | -7.03                  | 66413      | 8728978.78 |
| PGN1156 | <i>gpsA glycerol-3-phosphate dehydrogenase (NAD(P)+)</i>      |         |        |       |                        |                      |                               |  |   |          |                        |            |            |
| PG1370  | 0.446932                                                      | 108.75  | 128.5  | -0.24 | 7.89                   | Y                    |                               |  | Y | 0.161524 | 0.04                   | 75827745   | 73752341.8 |
| PGN1157 | <i>lysS lysyl-tRNA synthetase</i>                             |         |        |       |                        |                      |                               |  |   |          |                        |            |            |
| PG1371  | 0.000191                                                      | 43.71   | 80.5   | -0.88 | 6.96                   | G                    |                               |  | Y | 0.028201 | 0.50                   | 57764571   | 39922682.6 |
| PGN1158 | <i>phosphorylase family protein</i>                           |         |        |       |                        |                      |                               |  |   |          |                        |            |            |
| PG1372  | 0.751373                                                      | 53.31   | 46     | 0.21  | 6.63                   | Y                    |                               |  | Y | 0.146675 | -0.07                  | 14490860   | 15146007.4 |
| PGN1159 | <i>hypothetical protein PG_1372</i>                           |         |        |       |                        |                      |                               |  |   |          |                        |            |            |
| PG1066  | 0.250218                                                      | 66.1    | 73.5   | -0.15 | 7.13                   | Y                    |                               |  | G | 0.006088 | -0.29                  | 106386753  | 130060537  |
| PGN1162 | <i>ctfA butyrate-acetoacetate CoA-transferase subunit A</i>   |         |        |       |                        |                      |                               |  |   |          |                        |            |            |
| PG1067  | 0.480701                                                      | 53.31   | 40.5   | 0.4   | 6.55                   | Y                    |                               |  | Y | 0.067266 | -0.04                  | 42117021   | 43239949.5 |
| PGN1163 | <i>conserved hypothetical protein</i>                         |         |        |       |                        |                      |                               |  |   |          |                        |            |            |
| PG1068  | 0.059089                                                      | 243.09  | 240    | 0.02  | 8.92                   | Y                    |                               |  | G | 0.001290 | -0.22                  | 166349357  | 193539906  |
| PGN1164 | <i>conserved hypothetical protein</i>                         |         |        |       |                        |                      |                               |  |   |          |                        |            |            |
| PG1069  | 0.545730                                                      | 341.18  | 321.5  | 0.09  | 9.37                   | Y                    |                               |  | R | 0.001266 | 0.61                   | 386731407  | 253182320  |
| PGN1165 | <i>alcohol dehydrogenase zinc-containing putative</i>         |         |        |       |                        |                      |                               |  |   |          |                        |            |            |
| PG1070  | 0.213253                                                      | 106.62  | 134.5  | -0.34 | 7.91                   | Y                    |                               |  | Y | 0.026780 | -0.22                  | 90756405.5 | 105772351  |
| PGN1166 | <i>kamA L-lysine 23-aminomutase</i>                           |         |        |       |                        |                      |                               |  |   |          |                        |            |            |
| PG1072  | 0.203808                                                      | 2.13    | 11.5   | -2.43 | 3.77                   | Y                    |                               |  | G | 0.007211 | -5.01                  | 66413      | 2221930.85 |
| PGN1168 | <i>MutS family protein</i>                                    |         |        |       |                        |                      |                               |  |   |          |                        |            |            |
| PG1073  | 0.192280                                                      | 56.51   | 45     | 0.33  | 6.67                   | Y                    |                               |  | Y | 0.022832 | 0.82                   | 53020325.5 | 29228979.6 |
| PGN1169 | <i>kamD D-lysine 56-aminomutase alpha subunit</i>             |         |        |       |                        |                      |                               |  |   |          |                        |            |            |
| PG1074  | 0.290677                                                      | 58.64   | 75.5   | -0.36 | 7.07                   | Y                    |                               |  | Y | 0.113888 | -0.04                  | 29335040   | 30164746.2 |
| PGN1170 | <i>kamE D-lysine 56-aminomutase beta subunit</i>              |         |        |       |                        |                      |                               |  |   |          |                        |            |            |
| PG1075  | 0.010250                                                      | 36.25   | 61     | -0.75 | 6.6                    | Y                    |                               |  | Y | 0.014416 | -1.08                  | 10880808   | 21077514.2 |
| PGN1171 | <i>coenzyme A transferase beta subunit</i>                    |         |        |       |                        |                      |                               |  |   |          |                        |            |            |



| TIGR    | PgSgFn / Pg Spectral Count                                                                     |          |         |        |                        |                      | PgSgFn / Pg Protein Intensity |  |         |                        |          |       |            |            |
|---------|------------------------------------------------------------------------------------------------|----------|---------|--------|------------------------|----------------------|-------------------------------|--|---------|------------------------|----------|-------|------------|------------|
|         | PGN                                                                                            | q-value  | PgSgFn  | Pg     | log <sub>2</sub> Ratio | log <sub>2</sub> Sum | Regulation                    |  | q-value | log <sub>2</sub> Ratio | PgSgFn   | Pg    |            |            |
| PG1076  |                                                                                                | 0.779998 | 732.47  | 746.5  | -0.03                  | 10.53                | Y                             |  |         | G                      | 0.005860 | -0.50 | 613715767  | 868910725  |
| PGN1172 | <i>acdA acyl-CoA dehydrogenase short-chain specific</i>                                        |          |         |        |                        |                      |                               |  |         |                        |          |       |            |            |
| PG1077  |                                                                                                | 0.000000 | 788.98  | 597.5  | 0.4                    | 10.44                | R                             |  |         | R                      | 0.003984 | 0.33  | 984545854  | 785671469  |
| PGN1173 | <i>etfB-2 electron transfer flavoprotein beta subunit</i>                                      |          |         |        |                        |                      |                               |  |         |                        |          |       |            |            |
| PG1078  |                                                                                                | 0.000000 | 1973.52 | 1603   | 0.3                    | 11.8                 | R                             |  |         | Y                      | 0.026150 | 0.18  | 959478515  | 842193984  |
| PGN1174 | <i>etfA-2 electron transfer flavoprotein alpha subunit</i>                                     |          |         |        |                        |                      |                               |  |         |                        |          |       |            |            |
| PG1079  |                                                                                                | 0.176563 | 31.99   | 48.5   | -0.6                   | 6.33                 | Y                             |  |         | Y                      | 0.012037 | -0.41 | 28485202.5 | 37641287.4 |
| PGN1175 | <i>enoyl-CoA hydratase/isomerase family protein</i>                                            |          |         |        |                        |                      |                               |  |         |                        |          |       |            |            |
| PG1080  |                                                                                                | 0.290104 | 149.27  | 141.5  | 0.08                   | 8.18                 | Y                             |  |         | Y                      | 0.155528 | -0.03 | 70265061.5 | 72724313.7 |
| PGN1176 | <i>3-hydroxyacyl-CoA dehydrogenase family protein</i>                                          |          |         |        |                        |                      |                               |  |         |                        |          |       |            |            |
| PG1081  |                                                                                                | 0.000000 | 198.31  | 314    | -0.66                  | 9                    | G                             |  |         | G                      | 0.002376 | -0.56 | 247954562  | 366385874  |
| PGN1178 | <i>ackA acetate kinase</i>                                                                     |          |         |        |                        |                      |                               |  |         |                        |          |       |            |            |
| PG1082  |                                                                                                | 0.025944 | 574.68  | 503.5  | 0.19                   | 10.07                | Y                             |  |         | R                      | 0.003925 | 0.35  | 701101500  | 549727427  |
| PGN1179 | <i>pta phosphotransacetylase</i>                                                               |          |         |        |                        |                      |                               |  |         |                        |          |       |            |            |
| PG1084  |                                                                                                | 0.000000 | 834.83  | 1022.5 | -0.29                  | 10.86                | G                             |  |         | Y                      | 0.026630 | 0.09  | 696961665  | 654126966  |
| PGN1181 | <i>thioredoxin family protein</i>                                                              |          |         |        |                        |                      |                               |  |         |                        |          |       |            |            |
| PG1085  |                                                                                                | 0.000055 | 179.12  | 125    | 0.52                   | 8.25                 | R                             |  |         | Y                      | 0.115558 | 0.06  | 515691103  | 495001953  |
| PGN1182 | <i>hypothetical protein PG_1085</i>                                                            |          |         |        |                        |                      |                               |  |         |                        |          |       |            |            |
| PG1089  |                                                                                                | 0.000000 | 247.36  | 135    | 0.87                   | 8.58                 | R                             |  |         | Y                      | 0.032184 | 0.21  | 158878309  | 136647609  |
| PGN1186 | <i>rprY DNA-binding response regulator RprY</i>                                                |          |         |        |                        |                      |                               |  |         |                        |          |       |            |            |
| PG1091  |                                                                                                | 0.000491 | 2.13    | 20.5   | -3.27                  | 4.5                  | Y                             |  |         | G                      | 0.000009 | -6.15 | 66413      | 4679378.83 |
| PGN1187 | <i>DHH subfamily 1 protein</i>                                                                 |          |         |        |                        |                      |                               |  |         |                        |          |       |            |            |
| PG1093  |                                                                                                | 0.692989 | 34.12   | 29.5   | 0.21                   | 5.99                 | Y                             |  |         | Y                      | 0.029655 | 0.38  | 37000849   | 28101221.9 |
| PGN1188 | <i>hypothetical protein PG_1093</i>                                                            |          |         |        |                        |                      |                               |  |         |                        |          |       |            |            |
| PG1094  |                                                                                                | 0.550186 | 102.35  | 117    | -0.19                  | 7.78                 | Y                             |  |         | Y                      | 0.052192 | 0.15  | 105695235  | 95424078.3 |
| PGN1189 | <i>pgm phosphomannomutase</i>                                                                  |          |         |        |                        |                      |                               |  |         |                        |          |       |            |            |
| PG1095  |                                                                                                | 0.024693 | 2.13    | 15     | -2.82                  | 4.1                  | Y                             |  |         | G                      | 0.002953 | -6.22 | 66413      | 4988817.63 |
| PGN1190 | <i>RNA methyltransferase TrmA family</i>                                                       |          |         |        |                        |                      |                               |  |         |                        |          |       |            |            |
| PG1097  |                                                                                                | 0.014718 | 2.13    | 16     | -2.91                  | 4.18                 | Y                             |  |         | G                      | 0.000137 | -6.02 | 66413      | 4265644.75 |
| PGN1194 | <i>Mur ligase domain protein/alanine racemase</i>                                              |          |         |        |                        |                      |                               |  |         |                        |          |       |            |            |
| PG1098  |                                                                                                | 0.225676 | 2.13    | 6      | -1.49                  | 3.02                 | Y                             |  |         | Y                      | 0.052192 | -1.49 | 66413      | 867405     |
| PGN1195 | <i>hypothetical protein PG_1098</i>                                                            |          |         |        |                        |                      |                               |  |         |                        |          |       |            |            |
| PG1100  |                                                                                                | 0.751373 | 2.13    | 3      | -0.49                  | 2.36                 | Y                             |  |         | Y                      | 0.052108 | -2.43 | 66413      | 2395930.5  |
| PGN1197 | <i>hypothetical protein PG_1100</i>                                                            |          |         |        |                        |                      |                               |  |         |                        |          |       |            |            |
| PG1101  |                                                                                                | 0.751373 | 2.13    | 3      | -0.49                  | 2.36                 | Y                             |  |         | Y                      | 0.096757 | -0.00 | 66413      | 118326     |
| PGN1198 | <i>sodium:solute symporter family protein</i>                                                  |          |         |        |                        |                      |                               |  |         |                        |          |       |            |            |
| PG1497  |                                                                                                | 0.600049 | 2.13    | 4      | -0.91                  | 2.62                 | Y                             |  |         | Y                      | 0.076556 | -0.25 | 66413      | 162822     |
| PGN1199 | <i>DNA-binding protein histone-like family</i>                                                 |          |         |        |                        |                      |                               |  |         |                        |          |       |            |            |
| PG1103  |                                                                                                | 0.000000 | 2.13    | 29     | -3.77                  | 4.96                 | Y                             |  |         | G                      | 0.000044 | -6.25 | 66413      | 4984157.75 |
| PGN1200 | <i>ATPase AAA family</i>                                                                       |          |         |        |                        |                      |                               |  |         |                        |          |       |            |            |
| PG1105  |                                                                                                | 0.000479 | 2.13    | 20.5   | -3.27                  | 4.5                  | Y                             |  |         | G                      | 0.001531 | -6.35 | 66413      | 5423368.3  |
| PGN1202 | <i>rpoN RNA polymerase sigma-54 factor</i>                                                     |          |         |        |                        |                      |                               |  |         |                        |          |       |            |            |
| PG1106  |                                                                                                | 0.000336 | 2.13    | 21     | -3.3                   | 4.53                 | Y                             |  |         | G                      | 0.000674 | -6.62 | 66413      | 6494269.75 |
| PGN1203 | <i>murF UDP-N-acetylmuramoylalanyl-D-glutamyl-26-diaminopimelate--D-alanyl-D-alanyl ligase</i> |          |         |        |                        |                      |                               |  |         |                        |          |       |            |            |
| PG1114  |                                                                                                | 0.728237 | 21.32   | 18     | 0.24                   | 5.3                  | Y                             |  |         | Y                      | 0.120505 | -0.11 | 19503493.5 | 21903176   |
| PGN1204 | <i>panD aspartate-1-decarboxylase</i>                                                          |          |         |        |                        |                      |                               |  |         |                        |          |       |            |            |
| PG1115  |                                                                                                | 0.751373 | 82.1    | 81     | 0.02                   | 7.35                 | Y                             |  |         | Y                      | 0.024051 | -0.39 | 45951884.5 | 59972323.3 |
| PGN1205 | <i>ffh signal recognition particle protein</i>                                                 |          |         |        |                        |                      |                               |  |         |                        |          |       |            |            |

| TIGR    | PgSgFn / Pg Spectral Count                                                                  |        |       |                        |                      |            | PgSgFn / Pg Protein Intensity |                        |            |            |  |  |
|---------|---------------------------------------------------------------------------------------------|--------|-------|------------------------|----------------------|------------|-------------------------------|------------------------|------------|------------|--|--|
|         | q-value                                                                                     | PgSgFn | Pg    | log <sub>2</sub> Ratio | log <sub>2</sub> Sum | Regulation | q-value                       | log <sub>2</sub> Ratio | PgSgFn     | Pg         |  |  |
| PG1116  | 0.010468                                                                                    | 226.03 | 175.5 | 0.37                   | 8.65                 | Y ●● Y     | 0.059025                      | 0.07                   | 234967495  | 223816059  |  |  |
| PGN1206 | <i>folD methylenetetrahydrofolate dehydrogenase/methenyltetrahydrofolate cyclohydrolase</i> |        |       |                        |                      |            |                               |                        |            |            |  |  |
| PG1118  | 0.440970                                                                                    | 105.55 | 119   | -0.17                  | 7.81                 | Y ●● Y     | 0.050595                      | -0.30                  | 56284204   | 70224153.2 |  |  |
| PGN1208 | <i>clpB clpB protein</i>                                                                    |        |       |                        |                      |            |                               |                        |            |            |  |  |
| PG1119  | 0.679564                                                                                    | 71.43  | 79.5  | -0.15                  | 7.24                 | Y ●● Y     | 0.103945                      | -0.11                  | 36751946   | 39331855.1 |  |  |
| PGN1209 | <i>flavodoxin putative</i>                                                                  |        |       |                        |                      |            |                               |                        |            |            |  |  |
| PG1121  | 0.659176                                                                                    | 89.56  | 103   | -0.2                   | 7.59                 | Y ●● Y     | 0.155528                      | 0.05                   | 83350792   | 79919269.4 |  |  |
| PGN1218 | <i>asnS asparaginyl-tRNA synthetase</i>                                                     |        |       |                        |                      |            |                               |                        |            |            |  |  |
| PG1123  | 0.000000                                                                                    | 88.49  | 161   | -0.86                  | 7.96                 | G ●● G     | 0.009931                      | -0.41                  | 54793411   | 72603315   |  |  |
| PGN1220 | <i>purB adenylosuccinate lyase</i>                                                          |        |       |                        |                      |            |                               |                        |            |            |  |  |
| PG1124  | 0.283063                                                                                    | 9.6    | 15.5  | -0.69                  | 4.65                 | Y ●● Y     | 0.026630                      | -3.91                  | 5318754.5  | 13502525.9 |  |  |
| PGN1221 | <i>ATP:cob(I)alamin adenosyltransferase putative</i>                                        |        |       |                        |                      |            |                               |                        |            |            |  |  |
| PG1126  | 0.045570                                                                                    | 33.05  | 16.5  | 1                      | 5.63                 | Y ●● R     | 0.004704                      | 0.33                   | 10794856.5 | 8565584.88 |  |  |
| PGN1223 | <i>uraA uracil permease</i>                                                                 |        |       |                        |                      |            |                               |                        |            |            |  |  |
| PG1127  | 0.076002                                                                                    | 2.13   | 13.5  | -2.66                  | 3.97                 | Y ●● G     | 0.000137                      | -6.35                  | 66413      | 5345478.48 |  |  |
| PGN1224 | <i>transcriptional regulator AsnC Family</i>                                                |        |       |                        |                      |            |                               |                        |            |            |  |  |
| PG1129  | 0.001330                                                                                    | 129.01 | 185   | -0.52                  | 8.29                 | G ●● Y     | 0.100194                      | -0.09                  | 67433023.5 | 72035407.6 |  |  |
| PGN1226 | <i>nrd ribonucleotide reductase</i>                                                         |        |       |                        |                      |            |                               |                        |            |            |  |  |
| PG1130  | 0.608229                                                                                    | 2.13   | 8.5   | -2                     | 3.41                 | Y ●● G     | 0.000327                      | -5.42                  | 66413      | 2825666.68 |  |  |
| PGN1227 | <i>TPR domain protein</i>                                                                   |        |       |                        |                      |            |                               |                        |            |            |  |  |
| PG1132  | 0.295346                                                                                    | 159.93 | 136   | 0.23                   | 8.21                 | Y ●● G     | 0.009001                      | -0.42                  | 89095806   | 118504092  |  |  |
| PGN1229 | <i>valS valyl-tRNA synthetase</i>                                                           |        |       |                        |                      |            |                               |                        |            |            |  |  |
| PG1133  | 0.768073                                                                                    | 19.19  | 24    | -0.32                  | 5.43                 | Y ●● G     | 0.000462                      | -1.08                  | 8846350    | 18701410.1 |  |  |
| PGN1230 | <i>hypothetical protein PG_1133</i>                                                         |        |       |                        |                      |            |                               |                        |            |            |  |  |
| PG1134  | 0.000000                                                                                    | 107.69 | 186.5 | -0.79                  | 8.2                  | G ●● Y     | 0.158885                      | 0.14                   | 105484992  | 100245873  |  |  |
| PGN1232 | <i>trxB thioredoxin reductase</i>                                                           |        |       |                        |                      |            |                               |                        |            |            |  |  |
| PG1135  | 0.751373                                                                                    | 13.86  | 18    | -0.38                  | 4.99                 | Y ●● Y     | 0.015333                      | -0.81                  | 4819048.5  | 8619352.18 |  |  |
| PGN1233 | <i>bacterial sugar transferase</i>                                                          |        |       |                        |                      |            |                               |                        |            |            |  |  |
| PG1136  | 0.475857                                                                                    | 2.13   | 9     | -2.08                  | 3.48                 | Y ●● G     | 0.003580                      | -4.97                  | 66413      | 2097187.5  |  |  |
| PGN1234 | <i>conserved hypothetical protein</i>                                                       |        |       |                        |                      |            |                               |                        |            |            |  |  |
| PG1138  | 0.000141                                                                                    | 2.13   | 22    | -3.37                  | 4.59                 | Y ●● G     | 0.000137                      | -6.31                  | 66413      | 5233125.1  |  |  |
| PGN1236 | <i>porR pigmentation and extracellular proteinase regulator</i>                             |        |       |                        |                      |            |                               |                        |            |            |  |  |
| PG1139  | 0.620488                                                                                    | 26.65  | 30    | -0.17                  | 5.82                 | Y ●● Y     | 0.137374                      | 0.07                   | 19109323.5 | 16411510.2 |  |  |
| PGN1238 | <i>hypothetical protein PG_1139</i>                                                         |        |       |                        |                      |            |                               |                        |            |            |  |  |
| PG1140  | 0.608229                                                                                    | 2.13   | 8.5   | -2                     | 3.41                 | Y ●● G     | 0.000238                      | -5.63                  | 66413      | 3260432.65 |  |  |
| PGN1239 | <i>glycosyl transferase group 2 family protein</i>                                          |        |       |                        |                      |            |                               |                        |            |            |  |  |
| PG1141  | 0.756785                                                                                    | 19.19  | 22    | -0.2                   | 5.36                 | Y ●● Y     | 0.028659                      | -0.68                  | 6198220.5  | 9457935.3  |  |  |
| PGN1240 | <i>glycosyl transferase group 1 family protein</i>                                          |        |       |                        |                      |            |                               |                        |            |            |  |  |
| PG1143  | 0.001408                                                                                    | 8.53   | 26    | -1.61                  | 5.11                 | G ●● Y     | 0.014837                      | -4.23                  | 3899241    | 14799113.8 |  |  |
| PGN1243 | <i>sugar dehydrogenase UDP-glucose/GDP-mannose dehydrogenase family</i>                     |        |       |                        |                      |            |                               |                        |            |            |  |  |
| PG1145  | 0.535064                                                                                    | 23.46  | 33.5  | -0.51                  | 5.83                 | Y ●● G     | 0.007304                      | -0.69                  | 10874237   | 17671176.7 |  |  |
| PGN1245 | <i>long-chain-fatty-acid--CoA ligase putative</i>                                           |        |       |                        |                      |            |                               |                        |            |            |  |  |
| PG1149  | 0.659176                                                                                    | 23.46  | 27    | -0.2                   | 5.66                 | Y ●● Y     | 0.065448                      | 0.69                   | 21924902.5 | 10778140.1 |  |  |
| PGN1251 | <i>glycosyl transferase group 1 family protein</i>                                          |        |       |                        |                      |            |                               |                        |            |            |  |  |
| PG1151  | 0.012172                                                                                    | 55.44  | 85.5  | -0.62                  | 7.14                 | Y ●● Y     | 0.015803                      | -0.21                  | 33411549   | 38669237.1 |  |  |
| PGN1252 | <i>alcohol dehydrogenase iron-containing</i>                                                |        |       |                        |                      |            |                               |                        |            |            |  |  |
| PG1155  | 0.751373                                                                                    | 2.13   | 3     | -0.49                  | 2.36                 | Y ●● Y     | 0.052108                      | -2.23                  | 66413      | 2401366.5  |  |  |
| PGN1255 | <i>ADP-heptose--LPS heptosyltransferase putative</i>                                        |        |       |                        |                      |            |                               |                        |            |            |  |  |

| TIGR    | PgSgFn / Pg Spectral Count                             |         |        |       |                        |                      |            | PgSgFn / Pg Protein Intensity |                        |          |       |            |            |
|---------|--------------------------------------------------------|---------|--------|-------|------------------------|----------------------|------------|-------------------------------|------------------------|----------|-------|------------|------------|
|         | PGN                                                    | q-value | PgSgFn | Pg    | log <sub>2</sub> Ratio | log <sub>2</sub> Sum | Regulation | q-value                       | log <sub>2</sub> Ratio | PgSgFn   | Pg    |            |            |
| PG1156  | 0.274290                                               | 2.13    | 11     | -2.37 | 3.71                   | Y                    |            |                               | G                      | 0.000271 | -5.62 | 66413      | 3235642.5  |
| PGN1256 | <i>S4 domain protein</i>                               |         |        |       |                        |                      |            |                               |                        |          |       |            |            |
| PG1162  | 0.543202                                               | 2.13    | 9      | -2.08 | 3.48                   | Y                    |            |                               | Y                      | 0.025232 | -3.18 | 66413      | 732623     |
| PGN1261 | <i>ATP:cob(I)alamin adenosyltransferase putative</i>   |         |        |       |                        |                      |            |                               |                        |          |       |            |            |
| PG1163  | 0.115710                                               | 2.13    | 12.5   | -2.55 | 3.87                   | Y                    |            |                               | Y                      | 0.014416 | -4.46 | 66413      | 1619780    |
| PGN1262 | <i>cbiA cobyrinic acid ac-diamide synthase</i>         |         |        |       |                        |                      |            |                               |                        |          |       |            |            |
| PG1164  | 0.000026                                               | 43.71   | 87     | -0.99 | 7.03                   | G                    |            |                               | Y                      | 0.010329 | -0.93 | 17895463.5 | 32968922.2 |
| PGN1263 | <i>hypothetical protein PG_1164</i>                    |         |        |       |                        |                      |            |                               |                        |          |       |            |            |
| PG1170  | 0.751373                                               | 2.13    | 3      | -0.49 | 2.36                   | Y                    |            |                               | Y                      | 0.052108 | -2.37 | 66413      | 2912041    |
| PGN1267 | <i>SerB family protein</i>                             |         |        |       |                        |                      |            |                               |                        |          |       |            |            |
| PG1171  | 0.000000                                               | 45.85   | 92     | -1    | 7.11                   | G                    |            |                               | Y                      | 0.010571 | -1.46 | 16693903.5 | 38942831.3 |
| PGN1268 | <i>oxidoreductase putative</i>                         |         |        |       |                        |                      |            |                               |                        |          |       |            |            |
| PG1172  | 0.000001                                               | 105.55  | 53     | 0.99  | 7.31                   | R                    |            |                               | R                      | 0.001675 | 1.36  | 66856963.5 | 26374132.3 |
| PGN1269 | <i>iron-sulfur cluster binding protein putative</i>    |         |        |       |                        |                      |            |                               |                        |          |       |            |            |
| PG1173  | 0.647578                                               | 25.59   | 20     | 0.36  | 5.51                   | Y                    |            |                               | G                      | 0.009241 | -0.38 | 14378200.5 | 18741508.7 |
| PGN1270 | <i>YkgG family protein</i>                             |         |        |       |                        |                      |            |                               |                        |          |       |            |            |
| PG1174  | 0.000037                                               | 2.13    | 23.5   | -3.46 | 4.68                   | Y                    |            |                               | G                      | 0.000390 | -6.54 | 66413      | 6114505.58 |
| PGN1271 | <i>thioesterase family protein</i>                     |         |        |       |                        |                      |            |                               |                        |          |       |            |            |
| PG2188  | 0.188231                                               | 111.95  | 141    | -0.33 | 7.98                   | Y                    |            |                               | Y                      | 0.161524 | -0.08 | 69076606.5 | 71504450.5 |
| PGN1272 | <i>lysA diaminopimelate decarboxylase</i>              |         |        |       |                        |                      |            |                               |                        |          |       |            |            |
| PG1058  | 0.139125                                               | 6.4     | 16     | -1.32 | 4.49                   | Y                    |            |                               | G                      | 0.004568 | -4.40 | 1938503.5  | 9821825.13 |
| PGN1296 | <i>OmpA family protein</i>                             |         |        |       |                        |                      |            |                               |                        |          |       |            |            |
| PG1056  | 0.357095                                               | 7.46    | 14.5   | -0.96 | 4.46                   | Y                    |            |                               | Y                      | 0.028575 | -3.26 | 2227780.5  | 5618563.5  |
| PGN1298 | <i>conserved hypothetical protein</i>                  |         |        |       |                        |                      |            |                               |                        |          |       |            |            |
| PG1052  | 0.400806                                               | 2.13    | 5      | -1.23 | 2.83                   | Y                    |            |                               | Y                      | 0.052108 | -2.06 | 66413      | 1448884.5  |
| PGN1301 | <i>transcriptional regulator putative</i>              |         |        |       |                        |                      |            |                               |                        |          |       |            |            |
| PG1050  | 0.012070                                               | 2.13    | 16     | -2.91 | 4.18                   | Y                    |            |                               | G                      | 0.000390 | -5.86 | 66413      | 3831161.6  |
| PGN1303 | <i>hypothetical protein PG_1050</i>                    |         |        |       |                        |                      |            |                               |                        |          |       |            |            |
| PG1049  | 0.102059                                               | 26.65   | 44.5   | -0.74 | 6.15                   | Y                    |            |                               | G                      | 0.002063 | -1.00 | 13636023   | 26904687.7 |
| PGN1304 | <i>conserved hypothetical protein</i>                  |         |        |       |                        |                      |            |                               |                        |          |       |            |            |
| PG1044  | 0.398768                                               | 2.13    | 10     | -2.23 | 3.6                    | Y                    |            |                               | G                      | 0.002617 | -5.59 | 66413      | 3213807.85 |
| PGN1308 | <i>iron dependent repressor putative</i>               |         |        |       |                        |                      |            |                               |                        |          |       |            |            |
| PG1043  | 0.751373                                               | 2.13    | 3      | -0.49 | 2.36                   | Y                    |            |                               | Y                      | 0.052842 | -1.49 | 66413      | 663401     |
| PGN1309 | <i>feoB-1 ferrous iron transport protein B</i>         |         |        |       |                        |                      |            |                               |                        |          |       |            |            |
| PG1039  | 0.278503                                               | 29.85   | 44.5   | -0.58 | 6.22                   | Y                    |            |                               | G                      | 0.000584 | -1.06 | 10049993.5 | 21015456.1 |
| PGN1313 | <i>integral membrane protein</i>                       |         |        |       |                        |                      |            |                               |                        |          |       |            |            |
| PG1038  | 0.751373                                               | 2.13    | 3      | -0.49 | 2.36                   | Y                    |            |                               | Y                      | 0.052108 | -1.95 | 66413      | 1247991.83 |
| PGN1314 | <i>ATP-dependent DNA helicase UvrD/PcrA/Rep Family</i> |         |        |       |                        |                      |            |                               |                        |          |       |            |            |
| PG1037  | 0.014629                                               | 397.69  | 340.5  | 0.22  | 9.53                   | Y                    |            |                               | Y                      | 0.018412 | 0.16  | 351891467  | 315887549  |
| PGN1315 | <i>hypothetical protein PG_1037</i>                    |         |        |       |                        |                      |            |                               |                        |          |       |            |            |
| PG1036  | 0.017413                                               | 10.66   | 23.5   | -1.14 | 5.09                   | Y                    |            |                               | G                      | 0.007304 | -4.72 | 628299     | 8276260.65 |
| PGN1316 | <i>uvrA-1 excinuclease ABC A subunit</i>               |         |        |       |                        |                      |            |                               |                        |          |       |            |            |
| PG1035  | 0.773318                                               | 20.26   | 23     | -0.18 | 5.43                   | Y                    |            |                               | Y                      | 0.014221 | -0.70 | 8621698    | 13566718.8 |
| PGN1317 | <i>hypothetical protein PG_1035</i>                    |         |        |       |                        |                      |            |                               |                        |          |       |            |            |
| PG1034  | 0.286742                                               | 8.53    | 9.5    | -0.16 | 4.17                   | Y                    |            |                               | Y                      | 0.130581 | -2.72 | 2811217.5  | 3709027.53 |
| PGN1318 | <i>ABC transporter ATP-binding protein</i>             |         |        |       |                        |                      |            |                               |                        |          |       |            |            |
| PG1030  | 0.580738                                               | 30.92   | 40.5   | -0.39 | 6.16                   | Y                    |            |                               | Y                      | 0.022094 | -0.43 | 23253968.5 | 30875104.1 |
| PGN1321 | <i>hypothetical protein PG_1030</i>                    |         |        |       |                        |                      |            |                               |                        |          |       |            |            |

| TIGR    | PgSgFn / Pg Spectral Count                                       |         |        |       |                        |                      | PgSgFn / Pg Protein Intensity |  |   |          |                        |            |            |
|---------|------------------------------------------------------------------|---------|--------|-------|------------------------|----------------------|-------------------------------|--|---|----------|------------------------|------------|------------|
|         | PGN                                                              | q-value | PgSgFn | Pg    | log <sub>2</sub> Ratio | log <sub>2</sub> Sum | Regulation                    |  |   | q-value  | log <sub>2</sub> Ratio | PgSgFn     | Pg         |
| PG1028  | 0.014718                                                         | 509.64  | 580    | -0.19 | 10.09                  | Y                    |                               |  | Y | 0.056585 | -0.07                  | 300942842  | 316617805  |
| PGN1323 | <i>TPR domain protein</i>                                        |         |        |       |                        |                      |                               |  |   |          |                        |            |            |
| PG0685  | 0.000486                                                         | 2.13    | 20.5   | -3.27 | 4.5                    | Y                    |                               |  | G | 0.000592 | -6.78                  | 66413      | 7228712.28 |
| PGN1329 | <i>ABC transporter ATP-binding protein</i>                       |         |        |       |                        |                      |                               |  |   |          |                        |            |            |
| PG0628  | 0.000000                                                         | 12.79   | 43.5   | -1.77 | 5.81                   | G                    |                               |  | Y | 0.048991 | -3.60                  | 5237538    | 10840225.5 |
| PGN1330 | <i>ABC transporter ATP-binding protein</i>                       |         |        |       |                        |                      |                               |  |   |          |                        |            |            |
| PG1022  | 0.013053                                                         | 11.73   | 24.5   | -1.06 | 5.18                   | Y                    |                               |  | Y | 0.188417 | -2.86                  | 8483454.5  | 8238190.23 |
| PGN1334 | <i>hypothetical protein PG_1022</i>                              |         |        |       |                        |                      |                               |  |   |          |                        |            |            |
| PG1020  | 0.000000                                                         | 2.13    | 28     | -3.72 | 4.91                   | Y                    |                               |  | G | 0.005239 | -7.16                  | 66413      | 9738203.35 |
| PGN1335 | <i>hypothetical protein PG_1020</i>                              |         |        |       |                        |                      |                               |  |   |          |                        |            |            |
| PG1019  | 0.779998                                                         | 18.13   | 20     | -0.14 | 5.25                   | Y                    |                               |  | G | 0.003984 | -0.82                  | 5560293    | 9811986.05 |
| PGN1336 | <i>lipoprotein putative</i>                                      |         |        |       |                        |                      |                               |  |   |          |                        |            |            |
| PG1017  | 0.000000                                                         | 727.14  | 1116.5 | -0.62 | 10.85                  | G                    |                               |  | G | 0.005415 | -0.46                  | 615602388  | 846158749  |
| PGN1338 | <i>ppdK pyruvate phosphate dikinase</i>                          |         |        |       |                        |                      |                               |  |   |          |                        |            |            |
| PG1014  | 0.039368                                                         | 2.13    | 14.5   | -2.77 | 4.06                   | Y                    |                               |  | G | 0.003852 | -6.26                  | 66413      | 5157638.3  |
| PGN1340 | <i>TPR domain protein</i>                                        |         |        |       |                        |                      |                               |  |   |          |                        |            |            |
| PG1013  | 0.001687                                                         | 482.98  | 563    | -0.22 | 10.03                  | G                    |                               |  | R | 0.007440 | 0.06                   | 482577974  | 461839748  |
| PGN1341 | <i>acetyl-CoA hydrolase/transferase family protein</i>           |         |        |       |                        |                      |                               |  |   |          |                        |            |            |
| PG1012  | 0.173614                                                         | 2.13    | 12     | -2.49 | 3.82                   | Y                    |                               |  | Y | 0.015386 | -6.65                  | 66413      | 7514169.13 |
| PGN1342 | <i>tRNA-i(6)A37 modification enzyme MiaB</i>                     |         |        |       |                        |                      |                               |  |   |          |                        |            |            |
| PG1010  | 0.309110                                                         | 30.92   | 44.5   | -0.53 | 6.24                   | Y                    |                               |  | G | 0.000327 | -0.66                  | 20784669   | 32777918.9 |
| PGN1343 | <i>ABC transporter ATP-binding protein</i>                       |         |        |       |                        |                      |                               |  |   |          |                        |            |            |
| PG1009  | 0.206110                                                         | 8.53    | 7      | 0.29  | 3.96                   | Y                    |                               |  | G | 0.005266 | -3.51                  | 703430     | 3165665.18 |
| PGN1344 | <i>hypothetical protein PG_1009</i>                              |         |        |       |                        |                      |                               |  |   |          |                        |            |            |
| PG1008  | 0.400806                                                         | 2.13    | 5      | -1.23 | 2.83                   | Y                    |                               |  | Y | 0.061725 | -0.74                  | 66413      | 243923.5   |
| PGN1345 | <i>hypothetical protein PG_1008</i>                              |         |        |       |                        |                      |                               |  |   |          |                        |            |            |
| PG1007  | 0.543202                                                         | 2.13    | 9      | -2.08 | 3.48                   | Y                    |                               |  | G | 0.000670 | -6.01                  | 66413      | 4244878.18 |
| PGN1346 | <i>transcriptional regulator GntR family</i>                     |         |        |       |                        |                      |                               |  |   |          |                        |            |            |
| PG1006  | 0.766795                                                         | 86.36   | 94.5   | -0.13 | 7.5                    | Y                    |                               |  | Y | 0.037727 | 0.46                   | 104036836  | 73490598.7 |
| PGN1347 | <i>hypothetical protein PG_1006</i>                              |         |        |       |                        |                      |                               |  |   |          |                        |            |            |
| PG1004  | 0.006908                                                         | 542.69  | 486.5  | 0.16  | 10.01                  | R                    |                               |  | Y | 0.045407 | 0.15                   | 696743544  | 625278135  |
| PGN1349 | <i>prolyl oligopeptidase family protein</i>                      |         |        |       |                        |                      |                               |  |   |          |                        |            |            |
| PG1003  | 0.784897                                                         | 2.13    | 5.5    | -1.37 | 2.93                   | Y                    |                               |  | G | 0.001008 | -4.27                  | 66413      | 1274131.6  |
| PGN1350 | <i>conserved hypothetical protein</i>                            |         |        |       |                        |                      |                               |  |   |          |                        |            |            |
| PG1215  | 0.600536                                                         | 19.19   | 20.5   | -0.1  | 5.31                   | Y                    |                               |  | Y | 0.065448 | -0.33                  | 10713810.5 | 13229042.5 |
| PGN1354 | <i>lipoprotein protein putative</i>                              |         |        |       |                        |                      |                               |  |   |          |                        |            |            |
| PG1217  | 0.000017                                                         | 20.26   | 53.5   | -1.4  | 6.2                    | G                    |                               |  | G | 0.001266 | -1.42                  | 6366583    | 16717992.7 |
| PGN1356 | <i>hypothetical protein PG_1217</i>                              |         |        |       |                        |                      |                               |  |   |          |                        |            |            |
| PG1219  | 0.629971                                                         | 66.1    | 53.5   | 0.31  | 6.9                    | Y                    |                               |  | R | 0.007304 | 0.79                   | 90122798.5 | 52681804.5 |
| PGN1358 | <i>hypothetical protein PG_1219</i>                              |         |        |       |                        |                      |                               |  |   |          |                        |            |            |
| PG1220  | 0.018560                                                         | 2.13    | 15.5   | -2.86 | 4.14                   | Y                    |                               |  | G | 0.003602 | -6.78                  | 66413      | 7408642.03 |
| PGN1359 | <i>erythronate-4-phosphate dehydrogenase putative</i>            |         |        |       |                        |                      |                               |  |   |          |                        |            |            |
| PG1221  | 0.604563                                                         | 2.13    | 4      | -0.91 | 2.62                   | Y                    |                               |  | Y | 0.052147 | -1.68                  | 66413      | 863011.5   |
| PGN1360 | <i>oxidoreductase short chain dehydrogenase/reductase family</i> |         |        |       |                        |                      |                               |  |   |          |                        |            |            |
| PG1225  | 0.000371                                                         | 2.13    | 20.5   | -3.27 | 4.5                    | Y                    |                               |  | G | 0.004189 | -4.92                  | 66413      | 2047821.38 |
| PGN1363 | <i>ABC transporter ATP-binding protein</i>                       |         |        |       |                        |                      |                               |  |   |          |                        |            |            |
| PG1226  | 0.035356                                                         | 2.13    | 14.5   | -2.77 | 4.06                   | Y                    |                               |  | G | 0.003580 | -7.39                  | 66413      | 11242766.3 |
| PGN1364 | <i>peptidyl-prolyl cis-trans isomerase cyclophilin-type</i>      |         |        |       |                        |                      |                               |  |   |          |                        |            |            |

| TIGR    | PgSgFn / Pg Spectral Count                                                     |          |        |       |                        |                      | PgSgFn / Pg Protein Intensity |  |   |          |                        |            |            |
|---------|--------------------------------------------------------------------------------|----------|--------|-------|------------------------|----------------------|-------------------------------|--|---|----------|------------------------|------------|------------|
|         | PGN                                                                            | q-value  | PgSgFn | Pg    | log <sub>2</sub> Ratio | log <sub>2</sub> Sum | Regulation                    |  |   | q-value  | log <sub>2</sub> Ratio | PgSgFn     | Pg         |
| PG1230  | 0.000051                                                                       | 139.67   | 206    | -0.56 | 8.43                   | G                    |                               |  | G | 0.003764 | -0.68                  | 64189206   | 102278946  |
| PGN1366 | <i>hypothetical protein PG_1230</i>                                            |          |        |       |                        |                      |                               |  |   |          |                        |            |            |
| PG1232  | 0.000000                                                                       | 10073.35 | 7559.5 | 0.41  | 14.11                  | R                    |                               |  | R | 0.008613 | 0.11                   | 1.0952e+10 | 1.0158e+10 |
| PGN1367 | <i>gdh glutamate dehydrogenase NAD-specific</i>                                |          |        |       |                        |                      |                               |  |   |          |                        |            |            |
| PG1235  | 0.061342                                                                       | 233.5    | 285    | -0.29 | 9.02                   | Y                    |                               |  | Y | 0.024215 | -0.19                  | 209992420  | 240104441  |
| PGN1370 | <i>epimerase/reductase putative</i>                                            |          |        |       |                        |                      |                               |  |   |          |                        |            |            |
| PG1236  | 0.635799                                                                       | 69.3     | 57.5   | 0.27  | 6.99                   | Y                    |                               |  | Y | 0.020429 | 0.36                   | 27222741   | 21276529.2 |
| PGN1372 | <i>hypothetical protein PG_1236</i>                                            |          |        |       |                        |                      |                               |  |   |          |                        |            |            |
| PG1237  | 0.007047                                                                       | 2.13     | 17     | -3    | 4.26                   | Y                    |                               |  | G | 0.001392 | -8.29                  | 66413      | 20802399.9 |
| PGN1373 | <i>transcriptional regulator LuxR family</i>                                   |          |        |       |                        |                      |                               |  |   |          |                        |            |            |
| PG1239  | 0.000000                                                                       | 180.19   | 326    | -0.86 | 8.98                   | G                    |                               |  | Y | 0.123473 | 0.13                   | 174127855  | 154282117  |
| PGN1375 | <i>fabG 3-oxoacyl-(acyl-carrier-protein) reductase</i>                         |          |        |       |                        |                      |                               |  |   |          |                        |            |            |
| PG1240  | 0.273961                                                                       | 21.32    | 34     | -0.67 | 5.79                   | Y                    |                               |  | Y | 0.024343 | -0.31                  | 11867370.5 | 14748672.1 |
| PGN1376 | <i>transcriptional regulator tetR family</i>                                   |          |        |       |                        |                      |                               |  |   |          |                        |            |            |
| PG1241  | 0.000000                                                                       | 9.6      | 41.5   | -2.11 | 5.68                   | G                    |                               |  | Y | 0.011057 | -3.82                  | 2266589.5  | 8270883.58 |
| PGN1377 | <i>lepA GTP-binding protein Lepa</i>                                           |          |        |       |                        |                      |                               |  |   |          |                        |            |            |
| PG1242  | 0.134175                                                                       | 2.13     | 12.5   | -2.55 | 3.87                   | Y                    |                               |  | Y | 0.030329 | -7.02                  | 66413      | 12114954.7 |
| PGN1378 | <i>dnaB replicative DNA helicase</i>                                           |          |        |       |                        |                      |                               |  |   |          |                        |            |            |
| PG1246  | 0.002530                                                                       | 296.4    | 229.5  | 0.37  | 9.04                   | R                    |                               |  | Y | 0.124354 | 0.07                   | 163776703  | 152958394  |
| PGN1381 | <i>alaS alanyl-tRNA synthetase</i>                                             |          |        |       |                        |                      |                               |  |   |          |                        |            |            |
| PG1247  | 0.758093                                                                       | 2.13     | 6.5    | -1.61 | 3.11                   | Y                    |                               |  | G | 0.003885 | -5.43                  | 66413      | 2897898.5  |
| PGN1382 | <i>aroB 3-dehydroquinase synthase</i>                                          |          |        |       |                        |                      |                               |  |   |          |                        |            |            |
| PG1248  | 0.102520                                                                       | 8.53     | 17     | -0.99 | 4.67                   | Y                    |                               |  | G | 0.003925 | -5.09                  | 253895.5   | 5575176.88 |
| PGN1383 | <i>conserved hypothetical protein</i>                                          |          |        |       |                        |                      |                               |  |   |          |                        |            |            |
| PG1249  | 0.608229                                                                       | 2.13     | 8.5    | -2    | 3.41                   | Y                    |                               |  | G | 0.002417 | -6.23                  | 66413      | 4988978.8  |
| PGN1384 | <i>1-acyl-sn-glycerol-3-phosphate acetyltransferase putative</i>               |          |        |       |                        |                      |                               |  |   |          |                        |            |            |
| PG1253  | 0.001591                                                                       | 2.13     | 19     | -3.16 | 4.4                    | Y                    |                               |  | G | 0.000446 | -7.13                  | 66413      | 9254131.63 |
| PGN1388 | <i>ligA DNA ligase NAD-dependent</i>                                           |          |        |       |                        |                      |                               |  |   |          |                        |            |            |
| PG1256  | 0.000152                                                                       | 19.19    | 47.5   | -1.31 | 6.06                   | G                    |                               |  | G | 0.000476 | -1.51                  | 10560192.5 | 29952570   |
| PGN1391 | <i>ribonuclease Rne/Rng family</i>                                             |          |        |       |                        |                      |                               |  |   |          |                        |            |            |
| PG1258  | 0.275068                                                                       | 56.51    | 43.5   | 0.38  | 6.64                   | Y                    |                               |  | Y | 0.109736 | 0.26                   | 72082116.5 | 61572450.5 |
| PGN1393 | <i>hup-2 DNA-binding protein HU</i>                                            |          |        |       |                        |                      |                               |  |   |          |                        |            |            |
| PG1259  | 0.784897                                                                       | 2.13     | 5.5    | -1.37 | 2.93                   | Y                    |                               |  | G | 0.001293 | -3.35                  | 66413      | 674308.5   |
| PGN1395 | <i>nrdG anaerobic ribonucleoside-triphosphate reductase activating protein</i> |          |        |       |                        |                      |                               |  |   |          |                        |            |            |
| PG1260  | 0.161227                                                                       | 306      | 317.5  | -0.05 | 9.28                   | Y                    |                               |  | G | 0.006461 | -0.46                  | 197363410  | 271899860  |
| PGN1396 | <i>anaerobic ribonucleoside-triphosphate reductase putative</i>                |          |        |       |                        |                      |                               |  |   |          |                        |            |            |
| PG1269  | 0.000045                                                                       | 346.51   | 256.5  | 0.43  | 9.24                   | R                    |                               |  | R | 0.008738 | 0.19                   | 283711901  | 249493767  |
| PGN1401 | <i>pruA delta-1-pyrroline-5-carboxylate dehydrogenase</i>                      |          |        |       |                        |                      |                               |  |   |          |                        |            |            |
| PG1270  | 0.001065                                                                       | 2.13     | 19.5   | -3.19 | 4.43                   | Y                    |                               |  | G | 0.000295 | -7.97                  | 66413      | 16539277.9 |
| PGN1402 | <i>conserved hypothetical protein</i>                                          |          |        |       |                        |                      |                               |  |   |          |                        |            |            |
| PG1271  | 0.000042                                                                       | 154.6    | 223    | -0.53 | 8.56                   | G                    |                               |  | G | 0.000630 | -0.60                  | 141169939  | 214105302  |
| PGN1403 | <i>acetylornithine aminotransferase putative</i>                               |          |        |       |                        |                      |                               |  |   |          |                        |            |            |
| PG0568  | 0.007665                                                                       | 25.59    | 48.5   | -0.92 | 6.21                   | G                    |                               |  | R | 0.000998 | 2.01                   | 41770900.5 | 10356608   |
| PGN1405 | <i>efp-1 translation elongation factor P</i>                                   |          |        |       |                        |                      |                               |  |   |          |                        |            |            |
| PG0562  | 0.784897                                                                       | 2.13     | 5.5    | -1.37 | 2.93                   | Y                    |                               |  | G | 0.002392 | -4.78                  | 66413      | 1831556.08 |
| PGN1408 | <i>potassium uptake protein TrkA putative</i>                                  |          |        |       |                        |                      |                               |  |   |          |                        |            |            |
| PG0561  | 0.579385                                                                       | 347.58   | 357    | -0.04 | 9.46                   | Y                    |                               |  | G | 0.007920 | -0.50                  | 226721953  | 321016073  |
| PGN1409 | <i>peptidase M20/M25/M40 family</i>                                            |          |        |       |                        |                      |                               |  |   |          |                        |            |            |

| TIGR    | PgSgFn / Pg Spectral Count                                              |         |       |                        |                      |                                                                                                                                                                            | PgSgFn / Pg Protein Intensity |                        |        |            |            |  |
|---------|-------------------------------------------------------------------------|---------|-------|------------------------|----------------------|----------------------------------------------------------------------------------------------------------------------------------------------------------------------------|-------------------------------|------------------------|--------|------------|------------|--|
|         | q-value                                                                 | PgSgFn  | Pg    | log <sub>2</sub> Ratio | log <sub>2</sub> Sum | Regulation                                                                                                                                                                 | q-value                       | log <sub>2</sub> Ratio | PgSgFn | Pg         |            |  |
| PG0559  | 0.010680                                                                | 8.53    | 22    | -1.37                  | 4.93                 | Y       | G                             | 0.005673               | -4.91  | 2132827    | 14965411.7 |  |
| PGN1411 | <i>chlorohydrolase family protein</i>                                   |         |       |                        |                      |                                                                                                                                                                            |                               |                        |        |            |            |  |
| PG0558  | 0.000000                                                                | 173.79  | 440   | -1.34                  | 9.26                 | G       | G                             | 0.002693               | -0.54  | 135437828  | 196070652  |  |
| PGN1412 | <i>purine nucleoside phosphorylase I inosine and guanosine-specific</i> |         |       |                        |                      |                                                                                                                                                                            |                               |                        |        |            |            |  |
| PG0553  | 0.456632                                                                | 285.74  | 287   | -0.01                  | 9.16                 | Y       | Y                             | 0.052192               | -0.20  | 204340669  | 232411885  |  |
| PGN1416 | <i>extracellular protease putative</i>                                  |         |       |                        |                      |                                                                                                                                                                            |                               |                        |        |            |            |  |
| PG0548  | 0.000000                                                                | 990.49  | 762.5 | 0.38                   | 10.78                | R       | Y                             | 0.077211               | 0.11   | 644782193  | 591512020  |  |
| PGN1418 | <i>pyruvate ferredoxin/ flavodoxin oxidoreductase family protein</i>    |         |       |                        |                      |                                                                                                                                                                            |                               |                        |        |            |            |  |
| PG0547  | 0.256970                                                                | 115.15  | 91    | 0.34                   | 7.69                 | Y       | R                             | 0.006226               | 0.25   | 74920007.5 | 63028366.3 |  |
| PGN1419 | <i>conserved hypothetical protein</i>                                   |         |       |                        |                      |                                                                                                                                                                            |                               |                        |        |            |            |  |
| PG0541  | 0.779998                                                                | 2.13    | 6     | -1.49                  | 3.02                 | Y       | G                             | 0.000323               | -6.13  | 66413      | 4603960.55 |  |
| PGN1429 | <i>hypothetical protein PG_0541</i>                                     |         |       |                        |                      |                                                                                                                                                                            |                               |                        |        |            |            |  |
| PG0539  | 0.000123                                                                | 2.13    | 22    | -3.37                  | 4.59                 | Y       | G                             | 0.000674               | -7.24  | 66413      | 9956127.78 |  |
| PGN1431 | <i>efflux transporter MFP component RND family</i>                      |         |       |                        |                      |                                                                                                                                                                            |                               |                        |        |            |            |  |
| PG0538  | 0.012108                                                                | 8.53    | 22.5  | -1.4                   | 4.96                 | Y       | Y                             | 0.029520               | -3.76  | 3583101.5  | 8646775.08 |  |
| PGN1432 | <i>outer membrane efflux protein</i>                                    |         |       |                        |                      |                                                                                                                                                                            |                               |                        |        |            |            |  |
| PG0537  | 0.000022                                                                | 1225.05 | 1045  | 0.23                   | 11.15                | R       | Y                             | 0.188417               | 0.00   | 969255145  | 967602451  |  |
| PGN1434 | <i>pepD-2 aminoacyl-histidine dipeptidase</i>                           |         |       |                        |                      |                                                                                                                                                                            |                               |                        |        |            |            |  |
| PG0535  | 0.457936                                                                | 50.11   | 38.5  | 0.38                   | 6.47                 | Y       | R                             | 0.000941               | 0.72   | 42310828   | 25716380   |  |
| PGN1436 | <i>conserved hypothetical protein</i>                                   |         |       |                        |                      |                                                                                                                                                                            |                               |                        |        |            |            |  |
| PG0534  | 0.000000                                                                | 17.06   | 57    | -1.74                  | 6.21                 | G       | Y                             | 0.024472               | -4.46  | 11046705   | 28439829.4 |  |
| PGN1437 | <i>hypothetical protein PG_0534</i>                                     |         |       |                        |                      |                                                                                                                                                                            |                               |                        |        |            |            |  |
| PG0532  | 0.600049                                                                | 2.13    | 4     | -0.91                  | 2.62                 | Y       | Y                             | 0.053939               | -1.15  | 66413      | 540795.5   |  |
| PGN1440 | <i>conserved domain protein</i>                                         |         |       |                        |                      |                                                                                                                                                                            |                               |                        |        |            |            |  |
| PG0531  | 0.259167                                                                | 85.3    | 107.5 | -0.33                  | 7.59                 | Y   | Y                             | 0.186035               | 0.00   | 80810482.5 | 80443230.2 |  |
| PGN1441 | <i>nadE glutamine-dependent NAD+ synthetase</i>                         |         |       |                        |                      |                                                                                                                                                                            |                               |                        |        |            |            |  |
| PG0530  | 0.492919                                                                | 154.6   | 139   | 0.15                   | 8.2                  | Y   | Y                             | 0.018197               | -0.35  | 94544242.5 | 120693110  |  |
| PGN1443 | <i>carB carbamoyl-phosphate synthase large subunit</i>                  |         |       |                        |                      |                                                                                                                                                                            |                               |                        |        |            |            |  |
| PG0529  | 0.004661                                                                | 25.59   | 48.5  | -0.92                  | 6.21                 | G   | G                             | 0.002890               | -1.34  | 9929761    | 25259380.9 |  |
| PGN1444 | <i>carA carbamoyl-phosphate synthase small subunit</i>                  |         |       |                        |                      |                                                                                                                                                                            |                               |                        |        |            |            |  |
| PG0528  | 0.779998                                                                | 67.17   | 67.5  | -0.01                  | 7.07                 | Y   | Y                             | 0.022094               | -0.74  | 21418079   | 36347930.4 |  |
| PGN1445 | <i>amidophosphoribosyltransferase putative</i>                          |         |       |                        |                      |                                                                                                                                                                            |                               |                        |        |            |            |  |
| PG0526  | 0.008604                                                                | 8.53    | 24    | -1.49                  | 5.02                 | G   | Y                             | 0.135130               | -3.35  | 9430454    | 12334337.6 |  |
| PGN1446 | <i>membrane protein putative</i>                                        |         |       |                        |                      |                                                                                                                                                                            |                               |                        |        |            |            |  |
| PG0525  | 0.706763                                                                | 49.04   | 57.5  | -0.23                  | 6.74                 | Y   | G                             | 0.006371               | -0.81  | 28996692.5 | 50451920.8 |  |
| PGN1447 | <i>pyrG CTP synthase</i>                                                |         |       |                        |                      |                                                                                                                                                                            |                               |                        |        |            |            |  |
| PG0523  | 0.751373                                                                | 169.52  | 184.5 | -0.12                  | 8.47                 | Y   | Y                             | 0.025368               | -0.55  | 76933219.5 | 109250594  |  |
| PGN1449 | <i>guaB inosine-5'-monophosphate dehydrogenase</i>                      |         |       |                        |                      |                                                                                                                                                                            |                               |                        |        |            |            |  |
| PG0521  | 0.153288                                                                | 73.57   | 71.5  | 0.04                   | 7.18                 | Y   | Y                             | 0.166018               | -0.31  | 88773434   | 79619171.6 |  |
| PGN1451 | <i>groES chaperonin 10 kDa</i>                                          |         |       |                        |                      |                                                                                                                                                                            |                               |                        |        |            |            |  |
| PG0520  | 0.000979                                                                | 1587.55 | 1720  | -0.12                  | 11.69                | G   | Y                             | 0.122361               | -0.10  | 734779497  | 778944771  |  |
| PGN1452 | <i>groEL chaperonin 60 kDa</i>                                          |         |       |                        |                      |                                                                                                                                                                            |                               |                        |        |            |            |  |
| PG0517  | 0.309161                                                                | 2.13    | 10    | -2.23                  | 3.6                  | Y   | G                             | 0.000295               | -5.59  | 66413      | 3158489.5  |  |
| PGN1455 | <i>hypothetical protein PG_0517</i>                                     |         |       |                        |                      |                                                                                                                                                                            |                               |                        |        |            |            |  |
| PG0516  | 0.182832                                                                | 2.13    | 11.5  | -2.43                  | 3.77                 | Y   | G                             | 0.008194               | -5.06  | 66413      | 2328561.83 |  |
| PGN1456 | <i>conserved hypothetical protein</i>                                   |         |       |                        |                      |                                                                                                                                                                            |                               |                        |        |            |            |  |
| PG0515  | 0.219720                                                                | 18.13   | 30    | -0.73                  | 5.59                 | Y   | Y                             | 0.019812               | -0.67  | 9362830.5  | 14694655.8 |  |
| PGN1457 | <i>conserved hypothetical protein</i>                                   |         |       |                        |                      |                                                                                                                                                                            |                               |                        |        |            |            |  |



| TIGR    | PgSgFn / Pg Spectral Count                                      |         |        |                        |                      |                                                                                                                                                                             | PgSgFn / Pg Protein Intensity |                        |            |            |  |  |
|---------|-----------------------------------------------------------------|---------|--------|------------------------|----------------------|-----------------------------------------------------------------------------------------------------------------------------------------------------------------------------|-------------------------------|------------------------|------------|------------|--|--|
|         | q-value                                                         | PgSgFn  | Pg     | log <sub>2</sub> Ratio | log <sub>2</sub> Sum | Regulation                                                                                                                                                                  | q-value                       | log <sub>2</sub> Ratio | PgSgFn     | Pg         |  |  |
| PG0514  | 0.000018                                                        | 248.42  | 330    | -0.41                  | 9.18                 | G   G     | 0.007211                      | -0.47                  | 139260079  | 191792057  |  |  |
| PGN1458 | <i>secA preprotein translocase SecA subunit</i>                 |         |        |                        |                      |                                                                                                                                                                             |                               |                        |            |            |  |  |
| PG0513  | 0.000201                                                        | 2.13    | 21.5   | -3.34                  | 4.56                 | Y   G     | 0.001046                      | -7.05                  | 66413      | 8761978.88 |  |  |
| PGN1459 | <i>conserved hypothetical protein TIGR00255</i>                 |         |        |                        |                      |                                                                                                                                                                             |                               |                        |            |            |  |  |
| PG0512  | 0.284896                                                        | 8.53    | 10     | -0.23                  | 4.21                 | Y   Y     | 0.128525                      | -2.31                  | 6285985    | 4192217.73 |  |  |
| PGN1460 | <i>gmk guanylate kinase</i>                                     |         |        |                        |                      |                                                                                                                                                                             |                               |                        |            |            |  |  |
| PG0506  | 0.001131                                                        | 3879.86 | 3595.5 | 0.11                   | 12.87                | R   R     | 0.005274                      | 0.30                   | 2.6713e+09 | 2.1608e+09 |  |  |
| PGN1466 | <i>prrR arginine-specific cysteine proteinase</i>               |         |        |                        |                      |                                                                                                                                                                             |                               |                        |            |            |  |  |
| PG0504  | 0.779998                                                        | 2.13    | 2.5    | -0.23                  | 2.21                 | Y   Y     | 0.055401                      | -1.10                  | 66413      | 390168.025 |  |  |
| PGN1468 | <i>lipA lipoate synthase</i>                                    |         |        |                        |                      |                                                                                                                                                                             |                               |                        |            |            |  |  |
| PG0503  | 0.156782                                                        | 99.16   | 129    | -0.38                  | 7.83                 | Y   G     | 0.001022                      | -0.99                  | 45611464   | 90319581.9 |  |  |
| PGN1469 | <i>dpp dipeptidyl aminopeptidase IV</i>                         |         |        |                        |                      |                                                                                                                                                                             |                               |                        |            |            |  |  |
| PG0500  | 0.786190                                                        | 34.12   | 35     | -0.04                  | 6.11                 | Y   Y     | 0.013203                      | 0.55                   | 12444619.5 | 8638450.55 |  |  |
| PGN1472 | <i>tgt queuine tRNA-ribosyltransferase</i>                      |         |        |                        |                      |                                                                                                                                                                             |                               |                        |            |            |  |  |
| PG0498  | 0.667335                                                        | 2.13    | 8      | -1.91                  | 3.34                 | Y   G     | 0.004014                      | -5.59                  | 66413      | 3243033.6  |  |  |
| PGN1474 | <i>luxS autoinducer-2 production protein LuxS</i>               |         |        |                        |                      |                                                                                                                                                                             |                               |                        |            |            |  |  |
| PG0495  | 0.001057                                                        | 299.6   | 239    | 0.33                   | 9.07                 | R   Y     | 0.039451                      | 0.26                   | 285894626  | 238536122  |  |  |
| PGN1476 | <i>hypothetical protein PG_0495</i>                             |         |        |                        |                      |                                                                                                                                                                             |                               |                        |            |            |  |  |
| PG0491  | 0.000001                                                        | 995.82  | 883.5  | 0.17                   | 10.88                | R   Y     | 0.061725                      | -0.06                  | 999229579  | 1.0426e+09 |  |  |
| PGN1479 | <i>conserved hypothetical protein</i>                           |         |        |                        |                      |                                                                                                                                                                             |                               |                        |            |            |  |  |
| PG0490  | 0.102044                                                        | 6.4     | 17     | -1.41                  | 4.55                 | Y   Y     | 0.042801                      | -4.08                  | 7151271.5  | 15254061.4 |  |  |
| PGN1480 | <i>membrane protein putative</i>                                |         |        |                        |                      |                                                                                                                                                                             |                               |                        |            |            |  |  |
| PG0488  | 0.045023                                                        | 10.66   | 21     | -0.98                  | 4.98                 | Y   Y     | 0.016816                      | -3.85                  | 3246191.5  | 10230794.5 |  |  |
| PGN1482 | <i>ruvB Holliday junction DNA helicase RuvB</i>                 |         |        |                        |                      |                                                                                                                                                                             |                               |                        |            |            |  |  |
| PG0486  | 0.659176                                                        | 2.13    | 8      | -1.91                  | 3.34                 | Y   G   | 0.006558                      | -5.51                  | 66413      | 3130300.95 |  |  |
| PGN1484 | <i>ogt methylated-DNA--protein-cysteine S-methyltransferase</i> |         |        |                        |                      |                                                                                                                                                                             |                               |                        |            |            |  |  |
| PG0485  | 0.604563                                                        | 85.3    | 101    | -0.24                  | 7.54                 | Y   Y | 0.028829                      | -0.25                  | 38683622.5 | 45922536.5 |  |  |
| PGN1485 | <i>yajC preprotein translocase YajC subunit</i>                 |         |        |                        |                      |                                                                                                                                                                             |                               |                        |            |            |  |  |
| PG0484  | 0.274290                                                        | 2.13    | 10.5   | -2.3                   | 3.66                 | Y   Y | 0.019992                      | -6.22                  | 66413      | 5892658.3  |  |  |
| PGN1486 | <i>hypothetical protein PG_0484</i>                             |         |        |                        |                      |                                                                                                                                                                             |                               |                        |            |            |  |  |
| PG0482  | 0.784897                                                        | 38.38   | 38.5   | 0                      | 6.26                 | Y   Y | 0.033883                      | -0.55                  | 37989557.5 | 53054156.4 |  |  |
| PGN1488 | <i>hypothetical protein PG_0482</i>                             |         |        |                        |                      |                                                                                                                                                                             |                               |                        |            |            |  |  |
| PG0481  | 0.000000                                                        | 384.89  | 581    | -0.59                  | 9.92                 | G   Y | 0.049354                      | 0.09                   | 466538344  | 437303734  |  |  |
| PGN1489 | <i>kbl 2-amino-3-ketobutyrate CoA ligase</i>                    |         |        |                        |                      |                                                                                                                                                                             |                               |                        |            |            |  |  |
| PG0479  | 0.773021                                                        | 2.13    | 6.5    | -1.61                  | 3.11                 | Y   G | 0.001865                      | -4.59                  | 66413      | 1595571.58 |  |  |
| PGN1491 | <i>hypothetical protein PG_0479</i>                             |         |        |                        |                      |                                                                                                                                                                             |                               |                        |            |            |  |  |
| PG0477  | 0.344563                                                        | 108.75  | 100    | 0.12                   | 7.71                 | Y   Y | 0.111797                      | -0.18                  | 43383274.5 | 48543513.2 |  |  |
| PGN1492 | <i>panC pantoate--beta-alanine ligase</i>                       |         |        |                        |                      |                                                                                                                                                                             |                               |                        |            |            |  |  |
| PG0476  | 0.056342                                                        | 20.26   | 35     | -0.79                  | 5.79                 | Y   Y | 0.171340                      | -0.04                  | 15971980.5 | 15363446.1 |  |  |
| PGN1493 | <i>yngK-2 yngK protein</i>                                      |         |        |                        |                      |                                                                                                                                                                             |                               |                        |            |            |  |  |
| PG0474  | 0.779998                                                        | 2.13    | 6      | -1.49                  | 3.02                 | Y   Y | 0.034691                      | -5.74                  | 66413      | 5437337.5  |  |  |
| PGN1495 | <i>low-specificity L-threonine aldolase</i>                     |         |        |                        |                      |                                                                                                                                                                             |                               |                        |            |            |  |  |
| PG0471  | 0.751373                                                        | 2.13    | 3      | -0.49                  | 2.36                 | Y   Y | 0.052108                      | -1.66                  | 66413      | 1091154.5  |  |  |
| PGN1498 | <i>hypothetical protein PG_0471</i>                             |         |        |                        |                      |                                                                                                                                                                             |                               |                        |            |            |  |  |
| PG0468  | 0.126368                                                        | 17.06   | 30.5   | -0.84                  | 5.57                 | Y   Y | 0.010571                      | -0.82                  | 9336391.5  | 16588815.9 |  |  |
| PGN1501 | <i>manA mannose-6-phosphate isomerase class I</i>               |         |        |                        |                      |                                                                                                                                                                             |                               |                        |            |            |  |  |
| PG0466  | 0.000979                                                        | 2.13    | 19.5   | -3.19                  | 4.43                 | Y   G | 0.004528                      | -7.80                  | 66413      | 15080789.3 |  |  |
| PGN1502 | <i>hypothetical protein PG_0466</i>                             |         |        |                        |                      |                                                                                                                                                                             |                               |                        |            |            |  |  |

| TIGR    | PgSgFn / Pg Spectral Count                                   |         |        |       |                        |                      | PgSgFn / Pg Protein Intensity |  |         |                        |        |            |            |
|---------|--------------------------------------------------------------|---------|--------|-------|------------------------|----------------------|-------------------------------|--|---------|------------------------|--------|------------|------------|
|         | PGN                                                          | q-value | PgSgFn | Pg    | log <sub>2</sub> Ratio | log <sub>2</sub> Sum | Regulation                    |  | q-value | log <sub>2</sub> Ratio | PgSgFn | Pg         |            |
| PG0465  | 0.201724                                                     | 22.39   | 34.5   | -0.62 | 5.83                   | Y                    |                               |  | G       | 0.004701               | -0.81  | 4930645.5  | 8687355.9  |
| PGN1503 | <i>fur ferric uptake transcriptional regulator</i>           |         |        |       |                        |                      |                               |  |         |                        |        |            |            |
| PG0464  | 0.008977                                                     | 234.56  | 176    | 0.41  | 8.68                   | R                    |                               |  | Y       | 0.127626               | -0.05  | 145076936  | 151399784  |
| PGN1504 | <i>purA adenylosuccinate synthetase</i>                      |         |        |       |                        |                      |                               |  |         |                        |        |            |            |
| PG0463  | 0.458416                                                     | 26.65   | 32     | -0.26 | 5.87                   | Y                    |                               |  | Y       | 0.105603               | -0.47  | 5294566.5  | 6660247.58 |
| PGN1505 | <i>folC folylpolyglutamate synthase</i>                      |         |        |       |                        |                      |                               |  |         |                        |        |            |            |
| PG0462  | 0.000000                                                     | 21.32   | 73.5   | -1.79 | 6.57                   | G                    |                               |  | G       | 0.000107               | -2.38  | 9187182    | 47663749.5 |
| PGN1506 | <i>transporter putative</i>                                  |         |        |       |                        |                      |                               |  |         |                        |        |            |            |
| PG0452  | 0.062104                                                     | 491.51  | 473    | 0.06  | 9.91                   | Y                    |                               |  | Y       | 0.029655               | 0.18   | 568926495  | 500831456  |
| PGN1510 | <i>conserved hypothetical protein</i>                        |         |        |       |                        |                      |                               |  |         |                        |        |            |            |
| PG0451  | 0.751373                                                     | 2.13    | 3      | -0.49 | 2.36                   | Y                    |                               |  | Y       | 0.052108               | -1.77  | 66413      | 977163.6   |
| PGN1511 | <i>CBS domain protein</i>                                    |         |        |       |                        |                      |                               |  |         |                        |        |            |            |
| PG0449  | 0.000000                                                     | 268.68  | 138    | 0.96  | 8.67                   | R                    |                               |  | R       | 0.005100               | 0.77   | 275338374  | 162894846  |
| PGN1513 | <i>TPR domain protein</i>                                    |         |        |       |                        |                      |                               |  |         |                        |        |            |            |
| PG0448  | 0.002517                                                     | 99.16   | 135.5  | -0.45 | 7.87                   | G                    |                               |  | Y       | 0.042501               | -0.26  | 64967812   | 77042535.8 |
| PGN1514 | <i>hypothetical protein PG_0448</i>                          |         |        |       |                        |                      |                               |  |         |                        |        |            |            |
| PG0447  | 0.243573                                                     | 6.4     | 15.5   | -1.28 | 4.45                   | Y                    |                               |  | G       | 0.004675               | -4.05  | 1737542    | 8419077.3  |
| PGN1515 | <i>conserved hypothetical protein</i>                        |         |        |       |                        |                      |                               |  |         |                        |        |            |            |
| PG0445  | 0.001704                                                     | 122.61  | 175.5  | -0.52 | 8.22                   | G                    |                               |  | Y       | 0.010555               | -0.38  | 91592883.5 | 119574802  |
| PGN1517 | <i>pepT peptidase T</i>                                      |         |        |       |                        |                      |                               |  |         |                        |        |            |            |
| PG0444  | 0.047330                                                     | 9.6     | 19     | -0.98 | 4.84                   | Y                    |                               |  | Y       | 0.053629               | -4.12  | 8353827    | 18151707.1 |
| PGN1518 | <i>oligopeptide transporter OPT family</i>                   |         |        |       |                        |                      |                               |  |         |                        |        |            |            |
| PG0443  | 0.182332                                                     | 99.16   | 120    | -0.28 | 7.78                   | Y                    |                               |  | G       | 0.006115               | -0.30  | 101836336  | 125140645  |
| PGN1519 | <i>hemagglutinin-related protein</i>                         |         |        |       |                        |                      |                               |  |         |                        |        |            |            |
| PG0441  | 0.398768                                                     | 2.13    | 10     | -2.23 | 3.6                    | Y                    |                               |  | G       | 0.004388               | -5.28  | 66413      | 2628415.53 |
| PGN1520 | <i>hypothetical protein PG_0441</i>                          |         |        |       |                        |                      |                               |  |         |                        |        |            |            |
| PG0437  | 0.774795                                                     | 27.72   | 31.5   | -0.18 | 5.89                   | Y                    |                               |  | G       | 0.002890               | -0.48  | 19139437.5 | 26681187   |
| PGN1523 | <i>polysaccharide export protein BexD/CtrA/VexA family</i>   |         |        |       |                        |                      |                               |  |         |                        |        |            |            |
| PG0436  | 0.639633                                                     | 85.3    | 93     | -0.12 | 7.48                   | Y                    |                               |  | Y       | 0.020525               | -0.49  | 21087446.5 | 28925421.7 |
| PGN1524 | <i>capsular polysaccharide transport protein putative</i>    |         |        |       |                        |                      |                               |  |         |                        |        |            |            |
| PG0435  | 0.600049                                                     | 2.13    | 8.5    | -2    | 3.41                   | Y                    |                               |  | G       | 0.000159               | -6.06  | 66413      | 4386078.3  |
| PGN1525 | <i>capsular polysaccharide biosynthesis protein putative</i> |         |        |       |                        |                      |                               |  |         |                        |        |            |            |
| PG0434  | 0.784897                                                     | 2.13    | 5.5    | -1.37 | 2.93                   | Y                    |                               |  | Y       | 0.017487               | -5.05  | 66413      | 2521465.3  |
| PGN1526 | <i>hypothetical protein PG_0434</i>                          |         |        |       |                        |                      |                               |  |         |                        |        |            |            |
| PG0433  | 0.006232                                                     | 7.46    | 23     | -1.62 | 4.93                   | G                    |                               |  | Y       | 0.013917               | -3.79  | 1833778    | 6320235.6  |
| PGN1527 | <i>tetrapyrrole methylase family protein</i>                 |         |        |       |                        |                      |                               |  |         |                        |        |            |            |
| PG0432  | 0.000408                                                     | 7.46    | 27     | -1.86 | 5.11                   | G                    |                               |  | Y       | 0.173433               | -3.15  | 12250860   | 10976273.5 |
| PGN1528 | <i>NOL1/NOP2/sun family protein</i>                          |         |        |       |                        |                      |                               |  |         |                        |        |            |            |
| PG0430  | 0.000000                                                     | 619.46  | 460.5  | 0.43  | 10.08                  | R                    |                               |  | Y       | 0.052108               | -0.10  | 438824770  | 472866611  |
| PGN1529 | <i>oxidoreductase putative</i>                               |         |        |       |                        |                      |                               |  |         |                        |        |            |            |
| PG0429  | 0.000000                                                     | 1259.17 | 1057.5 | 0.25  | 11.18                  | R                    |                               |  | R       | 0.004388               | 0.38   | 841964862  | 646793198  |
| PGN1530 | <i>pyruvate synthase</i>                                     |         |        |       |                        |                      |                               |  |         |                        |        |            |            |
| PG0540  | 0.516140                                                     | 19.19   | 28     | -0.55 | 5.56                   | Y                    |                               |  | G       | 0.000584               | -2.07  | 3683802    | 15439750.5 |
| PGN1540 | <i>AcrB/AcrD/AcrF family protein</i>                         |         |        |       |                        |                      |                               |  |         |                        |        |            |            |
| PG0423  | 0.272530                                                     | 8.53    | 14.5   | -0.77 | 4.53                   | Y                    |                               |  | Y       | 0.044266               | -4.05  | 7972425.5  | 19198037.9 |
| PGN1544 | <i>hypothetical protein PG_0423</i>                          |         |        |       |                        |                      |                               |  |         |                        |        |            |            |
| PG0421  | 0.014598                                                     | 8.53    | 22     | -1.37 | 4.93                   | Y                    |                               |  | Y       | 0.023219               | -4.08  | 4703888.5  | 12332220.2 |
| PGN1547 | <i>hypothetical protein PG_0421</i>                          |         |        |       |                        |                      |                               |  |         |                        |        |            |            |



| TIGR    | PgSgFn / Pg Spectral Count                                                                  |         |        |       |                        |                      | PgSgFn / Pg Protein Intensity |  |         |                        |        |            |            |
|---------|---------------------------------------------------------------------------------------------|---------|--------|-------|------------------------|----------------------|-------------------------------|--|---------|------------------------|--------|------------|------------|
|         | PGN                                                                                         | q-value | PgSgFn | Pg    | log <sub>2</sub> Ratio | log <sub>2</sub> Sum | Regulation                    |  | q-value | log <sub>2</sub> Ratio | PgSgFn | Pg         |            |
| PG0418  | 0.334790                                                                                    | 33.05   | 47     | -0.51 | 6.32                   | Y                    |                               |  | G       | 0.000446               | -0.80  | 25633971   | 44463742.5 |
| PGN1549 | <i>clpP ATP-dependent Clp protease proteolytic subunit</i>                                  |         |        |       |                        |                      |                               |  |         |                        |        |            |            |
| PG0417  | 0.024177                                                                                    | 18.13   | 36.5   | -1.01 | 5.77                   | Y                    |                               |  | Y       | 0.027084               | -0.65  | 15452316   | 25093692.7 |
| PGN1550 | <i>clpX ATP-dependent Clp protease ATP-binding subunit ClpX</i>                             |         |        |       |                        |                      |                               |  |         |                        |        |            |            |
| PG0416  | 0.441634                                                                                    | 58.64   | 53.5   | 0.13  | 6.81                   | Y                    |                               |  | Y       | 0.026780               | -0.43  | 13393794   | 17772678.5 |
| PGN1551 | <i>recQ-1 ATP-dependent DNA helicase RecQ</i>                                               |         |        |       |                        |                      |                               |  |         |                        |        |            |            |
| PG0415  | 0.430790                                                                                    | 73.57   | 80     | -0.12 | 7.26                   | Y                    |                               |  | G       | 0.000206               | -0.25  | 39511242.5 | 47005262.9 |
| PGN1552 | <i>peptidyl-prolyl cis-trans isomerase PPIC-type</i>                                        |         |        |       |                        |                      |                               |  |         |                        |        |            |            |
| PG0414  | 0.021655                                                                                    | 2.13    | 15     | -2.82 | 4.1                    | Y                    |                               |  | Y       | 0.014936               | -5.22  | 66413      | 2775469.95 |
| PGN1553 | <i>hypothetical protein PG_0414</i>                                                         |         |        |       |                        |                      |                               |  |         |                        |        |            |            |
| PG0413  | 0.035356                                                                                    | 9.6     | 2.5    | 1.94  | 3.6                    | Y                    |                               |  | Y       | 0.172311               | 0.84   | 1217443.5  | 1406502    |
| PGN1554 | <i>hypothetical protein PG_0413</i>                                                         |         |        |       |                        |                      |                               |  |         |                        |        |            |            |
| PG0412  | 0.042457                                                                                    | 8.53    | 19.5   | -1.19 | 4.81                   | Y                    |                               |  | Y       | 0.020429               | -4.02  | 3944306.5  | 10810044.9 |
| PGN1555 | <i>mutL DNA mismatch repair protein MutL</i>                                                |         |        |       |                        |                      |                               |  |         |                        |        |            |            |
| PG0411  | 0.492890                                                                                    | 77.83   | 90.5   | -0.22 | 7.4                    | Y                    |                               |  | Y       | 0.188417               | -0.13  | 22293332.5 | 22004748.3 |
| PGN1556 | <i>hemagglutinin putative</i>                                                               |         |        |       |                        |                      |                               |  |         |                        |        |            |            |
| PG0409  | 0.170868                                                                                    | 58.64   | 62.5   | -0.09 | 6.92                   | Y                    |                               |  | Y       | 0.051674               | 0.19   | 32076362   | 28300101   |
| PGN1557 | <i>hypothetical protein PG_0409</i>                                                         |         |        |       |                        |                      |                               |  |         |                        |        |            |            |
| PG0401  | 0.346258                                                                                    | 117.28  | 136.5  | -0.22 | 7.99                   | Y                    |                               |  | Y       | 0.050907               | -0.20  | 93489082   | 107388420  |
| PGN1564 | <i>KH/HDIG domain protein</i>                                                               |         |        |       |                        |                      |                               |  |         |                        |        |            |            |
| PG0400  | 0.410625                                                                                    | 10.66   | 11     | -0.05 | 4.44                   | Y                    |                               |  | Y       | 0.084073               | -2.69  | 2440644.5  | 3941891.13 |
| PGN1565 | <i>conserved hypothetical protein</i>                                                       |         |        |       |                        |                      |                               |  |         |                        |        |            |            |
| PG0398  | 0.000262                                                                                    | 2.13    | 21     | -3.3  | 4.53                   | Y                    |                               |  | Y       | 0.014886               | -5.92  | 66413      | 4522939.08 |
| PGN1567 | <i>recF recF protein</i>                                                                    |         |        |       |                        |                      |                               |  |         |                        |        |            |            |
| PG0396  | 0.492890                                                                                    | 9.6     | 8.5    | 0.18  | 4.18                   | Y                    |                               |  | Y       | 0.041109               | -2.26  | 755195.5   | 1608718.65 |
| PGN1569 | <i>transcriptional regulator Crp/Fnr family</i>                                             |         |        |       |                        |                      |                               |  |         |                        |        |            |            |
| PG0395  | 0.447261                                                                                    | 601.33  | 573    | 0.07  | 10.2                   | Y                    |                               |  | Y       | 0.119527               | -0.04  | 415731064  | 426181260  |
| PGN1570 | <i>rpoC DNA-directed RNA polymerase beta' subunit</i>                                       |         |        |       |                        |                      |                               |  |         |                        |        |            |            |
| PG0394  | 0.061251                                                                                    | 504.31  | 562.5  | -0.16 | 10.06                  | Y                    |                               |  | Y       | 0.088585               | -0.05  | 377120841  | 390109093  |
| PGN1571 | <i>rpoB DNA-directed RNA polymerase beta subunit</i>                                        |         |        |       |                        |                      |                               |  |         |                        |        |            |            |
| PG0393  | 0.018215                                                                                    | 842.29  | 939    | -0.16 | 10.8                   | Y                    |                               |  | R       | 0.003742               | 0.43   | 1.8494e+09 | 1.3761e+09 |
| PGN1572 | <i>rplL ribosomal protein L7/L12</i>                                                        |         |        |       |                        |                      |                               |  |         |                        |        |            |            |
| PG0392  | 0.000000                                                                                    | 1113.1  | 642.5  | 0.79  | 10.78                  | R                    |                               |  | Y       | 0.033358               | 0.41   | 464861931  | 344565272  |
| PGN1573 | <i>rplJ ribosomal protein L10</i>                                                           |         |        |       |                        |                      |                               |  |         |                        |        |            |            |
| PG0391  | 0.000000                                                                                    | 502.17  | 162    | 1.63  | 9.38                   | R                    |                               |  | Y       | 0.011751               | 0.72   | 186561733  | 111808114  |
| PGN1574 | <i>rplA ribosomal protein L1</i>                                                            |         |        |       |                        |                      |                               |  |         |                        |        |            |            |
| PG0390  | 0.000000                                                                                    | 206.84  | 105.5  | 0.97  | 8.29                   | R                    |                               |  | Y       | 0.043953               | 0.25   | 577374420  | 478623837  |
| PGN1575 | <i>rplK ribosomal protein L11</i>                                                           |         |        |       |                        |                      |                               |  |         |                        |        |            |            |
| PG0389  | 0.397614                                                                                    | 94.89   | 115    | -0.28 | 7.71                   | Y                    |                               |  | G       | 0.006764               | -0.91  | 22916872   | 43407048.5 |
| PGN1576 | <i>nusG transcription antitermination protein NusG</i>                                      |         |        |       |                        |                      |                               |  |         |                        |        |            |            |
| PG0387  | 0.000000                                                                                    | 2992.79 | 1743   | 0.78  | 12.21                  | R                    |                               |  | Y       | 0.026972               | 0.14   | 3.6929e+09 | 3.3677e+09 |
| PGN1578 | <i>tuf translation elongation factor Tu</i>                                                 |         |        |       |                        |                      |                               |  |         |                        |        |            |            |
| PG0386  | 0.283422                                                                                    | 334.78  | 296.5  | 0.18  | 9.3                    | Y                    |                               |  | Y       | 0.022948               | 0.10   | 185030617  | 173190186  |
| PGN1579 | <i>site-specific recombinase phage integrase family/ribosomal subunit interface protein</i> |         |        |       |                        |                      |                               |  |         |                        |        |            |            |
| PG0384  | 0.328062                                                                                    | 9.6     | 10.5   | -0.13 | 4.33                   | Y                    |                               |  | Y       | 0.052147               | -3.03  | 2674934    | 5180859.9  |
| PGN1581 | <i>MutS2 family protein</i>                                                                 |         |        |       |                        |                      |                               |  |         |                        |        |            |            |
| PG0383  | 0.383939                                                                                    | 2.13    | 10     | -2.23 | 3.6                    | Y                    |                               |  | G       | 0.000492               | -5.99  | 66413      | 4199100.05 |
| PGN1582 | <i>membrane-associated zinc metalloprotease putative</i>                                    |         |        |       |                        |                      |                               |  |         |                        |        |            |            |

| TIGR    | PgSgFn / Pg Spectral Count                                    |         |        |       |                        |                      | PgSgFn / Pg Protein Intensity |         |                        |          |       |            |            |
|---------|---------------------------------------------------------------|---------|--------|-------|------------------------|----------------------|-------------------------------|---------|------------------------|----------|-------|------------|------------|
|         | PGN                                                           | q-value | PgSgFn | Pg    | log <sub>2</sub> Ratio | log <sub>2</sub> Sum | Regulation                    | q-value | log <sub>2</sub> Ratio | PgSgFn   | Pg    |            |            |
| PG0380  | 0.000141                                                      | 2.13    | 22     | -3.37 | 4.59                   | Y                    |                               |         | G                      | 0.008458 | -6.95 | 66413      | 8685424.15 |
| PGN1585 | <i>uvrB excinuclease ABC B subunit</i>                        |         |        |       |                        |                      |                               |         |                        |          |       |            |            |
| PG0378  | 0.000000                                                      | 635.45  | 361    | 0.82  | 9.96                   | R                    |                               |         | R                      | 0.009124 | 0.28  | 438435471  | 361794829  |
| PGN1587 | <i>tsf translation elongation factor Ts</i>                   |         |        |       |                        |                      |                               |         |                        |          |       |            |            |
| PG0377  | 0.457936                                                      | 307.06  | 302    | 0.02  | 9.25                   | Y                    |                               |         | Y                      | 0.165042 | -0.04 | 242595388  | 247756522  |
| PGN1588 | <i>rpsB ribosomal protein S2</i>                              |         |        |       |                        |                      |                               |         |                        |          |       |            |            |
| PG0376  | 0.000000                                                      | 251.62  | 142.5  | 0.82  | 8.62                   | R                    |                               |         | R                      | 0.000561 | 0.91  | 91043955.5 | 48500330   |
| PGN1589 | <i>rpsL ribosomal protein S9</i>                              |         |        |       |                        |                      |                               |         |                        |          |       |            |            |
| PG0375  | 0.010705                                                      | 170.59  | 123.5  | 0.47  | 8.2                    | Y                    |                               |         | R                      | 0.006461 | 0.41  | 121584978  | 91914945.3 |
| PGN1590 | <i>rplM ribosomal protein L13</i>                             |         |        |       |                        |                      |                               |         |                        |          |       |            |            |
| PG0369  | 0.732133                                                      | 25.59   | 20.5   | 0.32  | 5.53                   | Y                    |                               |         | G                      | 0.007305 | -0.87 | 3867696    | 7101794.2  |
| PGN1593 | <i>coaD phosphopantetheine adenylyltransferase</i>            |         |        |       |                        |                      |                               |         |                        |          |       |            |            |
| PG0368  | 0.000015                                                      | 2.13    | 24.5   | -3.52 | 4.73                   | Y                    |                               |         | G                      | 0.006049 | -7.18 | 66413      | 9967298.75 |
| PGN1594 | <i>DNA topoisomerase IV B subunit putative</i>                |         |        |       |                        |                      |                               |         |                        |          |       |            |            |
| PG0366  | 0.751373                                                      | 2.13    | 7      | -1.72 | 3.19                   | Y                    |                               |         | G                      | 0.001445 | -5.28 | 66413      | 2571241.9  |
| PGN1595 | <i>hypothetical protein PG_0366</i>                           |         |        |       |                        |                      |                               |         |                        |          |       |            |            |
| PG0365  | 0.021047                                                      | 2.13    | 15.5   | -2.86 | 4.14                   | Y                    |                               |         | G                      | 0.000585 | -5.04 | 66413      | 2167827.63 |
| PGN1596 | <i>3'-5' exonuclease domain protein</i>                       |         |        |       |                        |                      |                               |         |                        |          |       |            |            |
| PG0364  | 0.039231                                                      | 2.13    | 14.5   | -2.77 | 4.06                   | Y                    |                               |         | G                      | 0.000584 | -6.13 | 66413      | 4624607.25 |
| PGN1597 | <i>conserved hypothetical protein</i>                         |         |        |       |                        |                      |                               |         |                        |          |       |            |            |
| PG0362  | 0.031975                                                      | 9.6     | 19.5   | -1.02 | 4.86                   | Y                    |                               |         | Y                      | 0.114945 | -3.43 | 6624937.5  | 9362823.43 |
| PGN1599 | <i>hypothetical protein PG_0362</i>                           |         |        |       |                        |                      |                               |         |                        |          |       |            |            |
| PG0361  | 0.115168                                                      | 8.53    | 18.5   | -1.12 | 4.76                   | Y                    |                               |         | G                      | 0.006461 | -3.88 | 1625634    | 7276935.98 |
| PGN1600 | <i>conserved domain protein</i>                               |         |        |       |                        |                      |                               |         |                        |          |       |            |            |
| PG0360  | 0.652130                                                      | 54.38   | 48.5   | 0.17  | 6.68                   | Y                    |                               |         | Y                      | 0.088585 | 0.11  | 37781630   | 34932838.7 |
| PGN1601 | <i>lemA protein</i>                                           |         |        |       |                        |                      |                               |         |                        |          |       |            |            |
| PG0359  | 0.779998                                                      | 2.13    | 6      | -1.49 | 3.02                   | Y                    |                               |         | G                      | 0.000462 | -5.77 | 66413      | 3601897.23 |
| PGN1602 | <i>flavin reductase domain protein</i>                        |         |        |       |                        |                      |                               |         |                        |          |       |            |            |
| PG0358  | 0.024177                                                      | 2.13    | 15     | -2.82 | 4.1                    | Y                    |                               |         | G                      | 0.005288 | -7.02 | 66413      | 8844550.78 |
| PGN1603 | <i>pyrI aspartate carbamoyltransferase regulatory subunit</i> |         |        |       |                        |                      |                               |         |                        |          |       |            |            |
| PG0357  | 0.714916                                                      | 49.04   | 43.5   | 0.17  | 6.53                   | Y                    |                               |         | Y                      | 0.058540 | 0.18  | 42319736.5 | 37211296   |
| PGN1604 | <i>pyrB aspartate carbamoyltransferase catalytic subunit</i>  |         |        |       |                        |                      |                               |         |                        |          |       |            |            |
| PG0356  | 0.000000                                                      | 12.79   | 49     | -1.94 | 5.95                   | G                    |                               |         | Y                      | 0.016418 | -4.59 | 5326173    | 22748181.9 |
| PGN1605 | <i>conserved hypothetical protein</i>                         |         |        |       |                        |                      |                               |         |                        |          |       |            |            |
| PG0350  | 0.770282                                                      | 181.25  | 190.5  | -0.07 | 8.54                   | Y                    |                               |         | Y                      | 0.049785 | 0.32  | 224751036  | 183721873  |
| PGN1611 | <i>internalin-related protein</i>                             |         |        |       |                        |                      |                               |         |                        |          |       |            |            |
| PG0348  | 0.685422                                                      | 2.13    | 3.5    | -0.72 | 2.49                   | Y                    |                               |         | Y                      | 0.052108 | -2.33 | 66413      | 2721258.5  |
| PGN1613 | <i>recG ATP-dependent DNA helicase RecG</i>                   |         |        |       |                        |                      |                               |         |                        |          |       |            |            |
| PG0347  | 0.659176                                                      | 41.58   | 51     | -0.29 | 6.53                   | Y                    |                               |         | Y                      | 0.031695 | -0.33 | 23222175   | 28658677.3 |
| PGN1614 | <i>galE UDP-glucose 4-epimerase</i>                           |         |        |       |                        |                      |                               |         |                        |          |       |            |            |
| PG0346  | 0.199425                                                      | 8.53    | 13.5   | -0.66 | 4.46                   | Y                    |                               |         | Y                      | 0.089345 | -3.19 | 3867773    | 6336013.15 |
| PGN1615 | <i>GTP-binding protein</i>                                    |         |        |       |                        |                      |                               |         |                        |          |       |            |            |
| PG0344  | 0.148470                                                      | 12.79   | 17     | -0.41 | 4.9                    | Y                    |                               |         | Y                      | 0.027355 | -3.70 | 4239952.5  | 10424632.6 |
| PGN1617 | <i>purple acid phosphatase</i>                                |         |        |       |                        |                      |                               |         |                        |          |       |            |            |
| PG0343  | 0.000000                                                      | 1221.85 | 1373   | -0.17 | 11.34                  | G                    |                               |         | G                      | 0.005129 | -0.48 | 462480587  | 645066828  |
| PGN1618 | <i>megL methionine gamma-lyase</i>                            |         |        |       |                        |                      |                               |         |                        |          |       |            |            |
| PG0339  | 0.486452                                                      | 9.6     | 12     | -0.32 | 4.43                   | Y                    |                               |         | Y                      | 0.028829 | -2.16 | 432901     | 1147921.35 |
| PGN1622 | <i>hypothetical protein PG_0339</i>                           |         |        |       |                        |                      |                               |         |                        |          |       |            |            |

| TIGR    | PgSgFn / Pg Spectral Count                                 |         |        |       |                        |                      | PgSgFn / Pg Protein Intensity |         |                        |          |       |            |            |
|---------|------------------------------------------------------------|---------|--------|-------|------------------------|----------------------|-------------------------------|---------|------------------------|----------|-------|------------|------------|
|         | PGN                                                        | q-value | PgSgFn | Pg    | log <sub>2</sub> Ratio | log <sub>2</sub> Sum | Regulation                    | q-value | log <sub>2</sub> Ratio | PgSgFn   | Pg    |            |            |
| PG0338  | 0.000000                                                   | 2.13    | 45.5   | -4.42 | 5.57                   | Y                    |                               |         | G                      | 0.000005 | -7.39 | 66413      | 11045658.2 |
| PGN1623 | <i>hypothetical protein PG_0338</i>                        |         |        |       |                        |                      |                               |         |                        |          |       |            |            |
| PG0336  | 0.000000                                                   | 23.46   | 46     | -0.97 | 6.12                   | G                    |                               |         | Y                      | 0.096757 | -3.35 | 6855146    | 10427369.1 |
| PGN1625 | <i>hypothetical protein PG_0336</i>                        |         |        |       |                        |                      |                               |         |                        |          |       |            |            |
| PG0334  | 0.389823                                                   | 39.45   | 54.5   | -0.47 | 6.55                   | Y                    |                               |         | G                      | 0.004947 | -0.51 | 9482461.5  | 13517124.3 |
| PGN1628 | <i>glycosyl transferase group 2 family protein</i>         |         |        |       |                        |                      |                               |         |                        |          |       |            |            |
| PG0332  | 0.631759                                                   | 109.82  | 114.5  | -0.06 | 7.81                   | Y                    |                               |         | Y                      | 0.027198 | -0.36 | 69931104.5 | 90058764.5 |
| PGN1630 | <i>rho transcription termination factor Rho</i>            |         |        |       |                        |                      |                               |         |                        |          |       |            |            |
| PG0330  | 0.000000                                                   | 130.08  | 59.5   | 1.13  | 7.57                   | R                    |                               |         | Y                      | 0.103175 | -0.04 | 137526882  | 141151058  |
| PGN1631 | <i>DNA-binding protein histone-like family</i>             |         |        |       |                        |                      |                               |         |                        |          |       |            |            |
| PG0329  | 0.000000                                                   | 381.7   | 547.5  | -0.52 | 9.86                   | G                    |                               |         | Y                      | 0.011984 | -0.46 | 413149770  | 568563164  |
| PGN1633 | <i>formiminotransferase-cyclodeaminase-related protein</i> |         |        |       |                        |                      |                               |         |                        |          |       |            |            |
| PG0328  | 0.046146                                                   | 63.97   | 86     | -0.43 | 7.23                   | Y                    |                               |         | Y                      | 0.017665 | -0.45 | 49637981.5 | 66604803.4 |
| PGN1634 | <i>hutI imidazolonepropionase</i>                          |         |        |       |                        |                      |                               |         |                        |          |       |            |            |
| PG0327  | 0.383939                                                   | 2.13    | 10     | -2.23 | 3.6                    | Y                    |                               |         | G                      | 0.008538 | -6.37 | 66413      | 5814700.5  |
| PGN1635 | <i>hypothetical protein PG_0327</i>                        |         |        |       |                        |                      |                               |         |                        |          |       |            |            |
| PG0326  | 0.000000                                                   | 20.26   | 59.5   | -1.55 | 6.32                   | G                    |                               |         | Y                      | 0.016418 | -4.51 | 6818313    | 23690279.7 |
| PGN1636 | <i>hypothetical protein PG_0326</i>                        |         |        |       |                        |                      |                               |         |                        |          |       |            |            |
| PG0325  | 0.000000                                                   | 384.89  | 253    | 0.61  | 9.32                   | R                    |                               |         | G                      | 0.002035 | -0.17 | 165112101  | 186239847  |
| PGN1637 | <i>conserved hypothetical protein</i>                      |         |        |       |                        |                      |                               |         |                        |          |       |            |            |
| PG0324  | 0.523440                                                   | 190.85  | 190.5  | 0     | 8.57                   | Y                    |                               |         | G                      | 0.009482 | -0.24 | 145106967  | 171863314  |
| PGN1638 | <i>hutH histidine ammonia-lyase</i>                        |         |        |       |                        |                      |                               |         |                        |          |       |            |            |
| PG0323  | 0.000000                                                   | 100.22  | 46     | 1.12  | 7.19                   | R                    |                               |         | Y                      | 0.172311 | -0.01 | 29140455.5 | 29589309.5 |
| PGN1639 | <i>conserved hypothetical protein</i>                      |         |        |       |                        |                      |                               |         |                        |          |       |            |            |
| PG0321  | 0.779998                                                   | 27.72   | 27.5   | 0.01  | 5.79                   | Y                    |                               |         | Y                      | 0.022094 | 0.84  | 29738956   | 16388090   |
| PGN1641 | <i>LAO/AO transport system ATPase</i>                      |         |        |       |                        |                      |                               |         |                        |          |       |            |            |
| PG0319  | 0.000018                                                   | 77.83   | 39     | 1     | 6.87                   | R                    |                               |         | R                      | 0.009001 | 1.17  | 83923687.5 | 36726884.3 |
| PGN1643 | <i>hypothetical protein PG_0319</i>                        |         |        |       |                        |                      |                               |         |                        |          |       |            |            |
| PG0317  | 0.000387                                                   | 14.93   | 29.5   | -0.98 | 5.47                   | G                    |                               |         | Y                      | 0.025864 | -4.24 | 5267472.5  | 14959937.3 |
| PGN1645 | <i>peptidase M49 family</i>                                |         |        |       |                        |                      |                               |         |                        |          |       |            |            |
| PG0316  | 0.102044                                                   | 92.76   | 104.5  | -0.17 | 7.62                   | Y                    |                               |         | Y                      | 0.058124 | 0.11  | 40752777   | 37826893   |
| PGN1646 | <i>serS seryl-tRNA synthetase</i>                          |         |        |       |                        |                      |                               |         |                        |          |       |            |            |
| PG0315  | 0.000001                                                   | 17.06   | 3      | 2.51  | 4.33                   | Y                    |                               |         | Y                      | 0.079379 | 1.58  | 8366899.5  | 2668978.5  |
| PGN1647 | <i>rpmA ribosomal protein L27</i>                          |         |        |       |                        |                      |                               |         |                        |          |       |            |            |
| PG0314  | 0.000182                                                   | 47.98   | 24.5   | 0.97  | 6.18                   | R                    |                               |         | R                      | 0.003764 | 0.51  | 39782166.5 | 27968493.8 |
| PGN1648 | <i>rplU ribosomal protein L21</i>                          |         |        |       |                        |                      |                               |         |                        |          |       |            |            |
| PG0311  | 0.240620                                                   | 8.53    | 13     | -0.61 | 4.43                   | Y                    |                               |         | Y                      | 0.052192 | -3.03 | 2003483.5  | 3875958.78 |
| PGN1651 | <i>glycosyl transferase group 2 family protein</i>         |         |        |       |                        |                      |                               |         |                        |          |       |            |            |
| PG0310  | 0.348525                                                   | 43.71   | 48     | -0.14 | 6.52                   | Y                    |                               |         | Y                      | 0.163917 | 0.06  | 27216100.5 | 26419807   |
| PGN1652 | <i>nitroreductase family protein</i>                       |         |        |       |                        |                      |                               |         |                        |          |       |            |            |
| PG0306  | 0.022165                                                   | 90.63   | 122.5  | -0.43 | 7.74                   | Y                    |                               |         | G                      | 0.000636 | -0.67 | 74876314.5 | 119355832  |
| PGN1656 | <i>electron transport complex RnfABCDGE type G subunit</i> |         |        |       |                        |                      |                               |         |                        |          |       |            |            |
| PG0305  | 0.758460                                                   | 15.99   | 12     | 0.41  | 4.81                   | Y                    |                               |         | Y                      | 0.120505 | -0.13 | 8330996    | 8951268.88 |
| PGN1657 | <i>electron transport complex RnfABCDGE type D subunit</i> |         |        |       |                        |                      |                               |         |                        |          |       |            |            |
| PG0304  | 0.000381                                                   | 489.38  | 478.5  | 0.03  | 9.92                   | R                    |                               |         | Y                      | 0.135130 | 0.06  | 401823549  | 385420079  |
| PGN1658 | <i>electron transport complex RnfABCDGE type C subunit</i> |         |        |       |                        |                      |                               |         |                        |          |       |            |            |
| PG0303  | 0.002443                                                   | 147.13  | 204    | -0.47 | 8.46                   | G                    |                               |         | Y                      | 0.017665 | -0.44 | 71730438   | 96616928.1 |
| PGN1659 | <i>electron transport complex RnfABCDGE type B subunit</i> |         |        |       |                        |                      |                               |         |                        |          |       |            |            |

| TIGR    | PgSgFn / Pg Spectral Count                                                             |         |        |       |                        |                      |            | PgSgFn / Pg Protein Intensity |                        |          |       |           |            |
|---------|----------------------------------------------------------------------------------------|---------|--------|-------|------------------------|----------------------|------------|-------------------------------|------------------------|----------|-------|-----------|------------|
|         | PGN                                                                                    | q-value | PgSgFn | Pg    | log <sub>2</sub> Ratio | log <sub>2</sub> Sum | Regulation | q-value                       | log <sub>2</sub> Ratio | PgSgFn   | Pg    |           |            |
| PG0300  | 0.779998                                                                               | 2.13    | 2.5    | -0.23 | 2.21                   | Y                    |            |                               | Y                      | 0.052192 | -1.64 | 66413     | 817565.325 |
| PGN1661 | <i>TPR domain protein</i>                                                              |         |        |       |                        |                      |            |                               |                        |          |       |           |            |
| PG0296  | 0.786190                                                                               | 309.19  | 298.5  | 0.05  | 9.25                   | Y                    |            |                               | Y                      | 0.142053 | 0.03  | 215021452 | 209885507  |
| PGN1666 | <i>phosphoribosylformylglycinamide synthase putative</i>                               |         |        |       |                        |                      |            |                               |                        |          |       |           |            |
| PG0295  | 0.751373                                                                               | 2.13    | 3      | -0.49 | 2.36                   | Y                    |            |                               | Y                      | 0.053384 | -1.35 | 66413     | 548506.65  |
| PGN1667 | <i>dprA DNA processing protein DprA putative</i>                                       |         |        |       |                        |                      |            |                               |                        |          |       |           |            |
| PG0294  | 0.751373                                                                               | 2.13    | 3      | -0.49 | 2.36                   | Y                    |            |                               | Y                      | 0.052842 | -1.46 | 66413     | 633436     |
| PGN1668 | <i>glycosyl transferase group 2 family protein</i>                                     |         |        |       |                        |                      |            |                               |                        |          |       |           |            |
| PG0293  | 0.000000                                                                               | 656.77  | 296.5  | 1.15  | 9.9                    | R                    |            |                               | R                      | 0.007580 | 0.48  | 858691770 | 614688055  |
| PGN1670 | <i>secretion activator protein putative</i>                                            |         |        |       |                        |                      |            |                               |                        |          |       |           |            |
| PG0291  | 0.097851                                                                               | 10.66   | 15     | -0.49 | 4.68                   | Y                    |            |                               | Y                      | 0.093332 | -3.59 | 7066864   | 11542441.2 |
| PGN1673 | <i>hypothetical protein PG_0291</i>                                                    |         |        |       |                        |                      |            |                               |                        |          |       |           |            |
| PG0290  | 0.000506                                                                               | 19.19   | 45.5   | -1.25 | 6.02                   | G                    |            |                               | G                      | 0.006115 | -1.26 | 10874006  | 26096336.5 |
| PGN1674 | <i>hypothetical protein PG_0290</i>                                                    |         |        |       |                        |                      |            |                               |                        |          |       |           |            |
| PG0289  | 0.751373                                                                               | 78.9    | 70.5   | 0.16  | 7.22                   | Y                    |            |                               | Y                      | 0.090791 | 0.13  | 42059691  | 37927948.2 |
| PGN1675 | <i>hypothetical protein PG_0289</i>                                                    |         |        |       |                        |                      |            |                               |                        |          |       |           |            |
| PG0288  | 0.014675                                                                               | 25.59   | 46     | -0.85 | 6.16                   | Y                    |            |                               | Y                      | 0.028659 | -0.51 | 17049916  | 24402470.6 |
| PGN1676 | <i>lipoprotein putative</i>                                                            |         |        |       |                        |                      |            |                               |                        |          |       |           |            |
| PG0287  | 0.784897                                                                               | 2.13    | 5.5    | -1.37 | 2.93                   | Y                    |            |                               | Y                      | 0.014959 | -4.91 | 66413     | 2224810.85 |
| PGN1677 | <i>hypothetical protein PG_0287</i>                                                    |         |        |       |                        |                      |            |                               |                        |          |       |           |            |
| PG0286  | 0.010781                                                                               | 2.13    | 16.5   | -2.95 | 4.22                   | Y                    |            |                               | G                      | 0.000492 | -7.54 | 66413     | 12274092.7 |
| PGN1678 | <i>hypothetical protein PG_0286</i>                                                    |         |        |       |                        |                      |            |                               |                        |          |       |           |            |
| PG0279  | 0.403113                                                                               | 122.61  | 129    | -0.07 | 7.98                   | Y                    |            |                               | Y                      | 0.113888 | -0.11 | 60383769  | 65807520.9 |
| PGN1685 | <i>maeB NADP-dependent malic enzyme</i>                                                |         |        |       |                        |                      |            |                               |                        |          |       |           |            |
| PG1747  | 0.030271                                                                               | 9.6     | 22     | -1.2  | 4.98                   | Y                    |            |                               | Y                      | 0.024343 | -3.96 | 5283792.5 | 14025138.4 |
| PGN1688 | <i>ribose 5-phosphate isomerase B putative</i>                                         |         |        |       |                        |                      |            |                               |                        |          |       |           |            |
| PG1748  | 0.243789                                                                               | 377.43  | 355    | 0.09  | 9.52                   | Y                    |            |                               | Y                      | 0.062627 | -0.14 | 365058399 | 406090044  |
| PGN1689 | <i>tkt transketolase</i>                                                               |         |        |       |                        |                      |            |                               |                        |          |       |           |            |
| PG1750  | 0.475857                                                                               | 2.13    | 9.5    | -2.16 | 3.54                   | Y                    |            |                               | G                      | 0.006226 | -5.11 | 66413     | 2372001.28 |
| PGN1690 | <i>alpha-13/4-fucosidase putative</i>                                                  |         |        |       |                        |                      |            |                               |                        |          |       |           |            |
| PG1753  | 0.560362                                                                               | 2.13    | 8.5    | -2    | 3.41                   | Y                    |            |                               | G                      | 0.004827 | -5.62 | 66413     | 3328013.18 |
| PGN1693 | <i>selD selenide water dikinase</i>                                                    |         |        |       |                        |                      |            |                               |                        |          |       |           |            |
| PG1754  | 0.720393                                                                               | 133.27  | 142    | -0.09 | 8.1                    | Y                    |            |                               | Y                      | 0.038496 | 0.46  | 132725247 | 94459296.8 |
| PGN1694 | <i>conserved domain protein</i>                                                        |         |        |       |                        |                      |            |                               |                        |          |       |           |            |
| PG1755  | 0.000000                                                                               | 722.88  | 525    | 0.46  | 10.29                  | R                    |            |                               | R                      | 0.007897 | 0.19  | 1.644e+09 | 1.4377e+09 |
| PGN1695 | <i>fabB fructose-bisphosphate aldolase class I</i>                                     |         |        |       |                        |                      |            |                               |                        |          |       |           |            |
| PG1757  | 0.659176                                                                               | 51.18   | 50     | 0.03  | 6.66                   | Y                    |            |                               | Y                      | 0.090791 | -0.14 | 29819663  | 32488824.8 |
| PGN1697 | <i>hypothetical protein PG_1757</i>                                                    |         |        |       |                        |                      |            |                               |                        |          |       |           |            |
| PG1758  | 0.000000                                                                               | 125.81  | 65     | 0.95  | 7.58                   | R                    |            |                               | R                      | 0.002518 | 0.80  | 106327078 | 61352407.7 |
| PGN1698 | <i>rpsO ribosomal protein S15</i>                                                      |         |        |       |                        |                      |            |                               |                        |          |       |           |            |
| PG1759  | 0.124784                                                                               | 14.93   | 15     | -0.01 | 4.9                    | Y                    |            |                               | Y                      | 0.153159 | -2.57 | 8819851.5 | 6964669.25 |
| PGN1699 | <i>adhesion protein putative</i>                                                       |         |        |       |                        |                      |            |                               |                        |          |       |           |            |
| PG1762  | 0.000000                                                                               | 753.8   | 419    | 0.85  | 10.2                   | R                    |            |                               | Y                      | 0.011011 | 0.31  | 832969074 | 672647831  |
| PGN1702 | <i>secDF protein-export membrane protein SecD/protein-export membrane protein SecF</i> |         |        |       |                        |                      |            |                               |                        |          |       |           |            |
| PG1763  | 0.779998                                                                               | 22.39   | 24     | -0.1  | 5.54                   | Y                    |            |                               | G                      | 0.001675 | -0.46 | 7506585   | 10324153.7 |
| PGN1703 | <i>rnc ribonuclease III</i>                                                            |         |        |       |                        |                      |            |                               |                        |          |       |           |            |
| PG1764  | 0.000000                                                                               | 2281.64 | 2135   | 0.1   | 12.11                  | R                    |            |                               | Y                      | 0.073682 | -0.10 | 997537790 | 1.0685e+09 |
| PGN1704 | <i>fabF 3-oxoacyl-(acyl-carrier-protein) synthase II</i>                               |         |        |       |                        |                      |            |                               |                        |          |       |           |            |

| TIGR    | PgSgFn / Pg Spectral Count                                  |         |        |       |                        |                      |            | PgSgFn / Pg Protein Intensity |                        |          |       |            |            |
|---------|-------------------------------------------------------------|---------|--------|-------|------------------------|----------------------|------------|-------------------------------|------------------------|----------|-------|------------|------------|
|         | PGN                                                         | q-value | PgSgFn | Pg    | log <sub>2</sub> Ratio | log <sub>2</sub> Sum | Regulation | q-value                       | log <sub>2</sub> Ratio | PgSgFn   | Pg    |            |            |
| PG1765  | 0.000000                                                    | 1227.18 | 449    | 1.45  | 10.71                  | R                    |            |                               | R                      | 0.007304 | 0.45  | 2.5781e+09 | 1.8925e+09 |
| PGN1705 | <i>acpP acyl carrier protein</i>                            |         |        |       |                        |                      |            |                               |                        |          |       |            |            |
| PG1766  | 0.779998                                                    | 2.13    | 6      | -1.49 | 3.02                   | Y                    |            |                               | G                      | 0.006652 | -5.52 | 66413      | 3168139.15 |
| PGN1706 | <i>purN phosphoribosylglycinamide formyltransferase</i>     |         |        |       |                        |                      |            |                               |                        |          |       |            |            |
| PG1767  | 0.543202                                                    | 2.13    | 9      | -2.08 | 3.48                   | Y                    |            |                               | G                      | 0.000770 | -5.29 | 66413      | 2578297.15 |
| PGN1707 | <i>lipoprotein putative</i>                                 |         |        |       |                        |                      |            |                               |                        |          |       |            |            |
| PG1771  | 0.307024                                                    | 75.7    | 89.5   | -0.24 | 7.37                   | Y                    |            |                               | G                      | 0.001455 | -0.57 | 23676048.5 | 35066909.3 |
| PGN1711 | <i>pheS phenylalanyl-tRNA synthetase alpha subunit</i>      |         |        |       |                        |                      |            |                               |                        |          |       |            |            |
| PG1772  | 0.720026                                                    | 2.13    | 7.5    | -1.82 | 3.27                   | Y                    |            |                               | G                      | 0.004884 | -4.47 | 66413      | 1497949.18 |
| PGN1712 | <i>nth endonuclease III</i>                                 |         |        |       |                        |                      |            |                               |                        |          |       |            |            |
| PG1774  | 0.001729                                                    | 14.93   | 29     | -0.96 | 5.46                   | G                    |            |                               | Y                      | 0.116286 | -3.07 | 5539359    | 7804806.2  |
| PGN1714 | <i>mfd transcription-repair coupling factor</i>             |         |        |       |                        |                      |            |                               |                        |          |       |            |            |
| PG1775  | 0.309348                                                    | 62.91   | 47.5   | 0.41  | 6.79                   | Y                    |            |                               | Y                      | 0.054253 | -0.35 | 23778711.5 | 30249325.5 |
| PGN1715 | <i>grpE grpE protein</i>                                    |         |        |       |                        |                      |            |                               |                        |          |       |            |            |
| PG1776  | 0.148377                                                    | 21.32   | 35.5   | -0.74 | 5.83                   | Y                    |            |                               | Y                      | 0.148734 | 0.11  | 5976622    | 5653923.25 |
| PGN1716 | <i>dnaJ dnaJ protein</i>                                    |         |        |       |                        |                      |            |                               |                        |          |       |            |            |
| PG1778  | 0.784897                                                    | 2.13    | 5.5    | -1.37 | 2.93                   | Y                    |            |                               | G                      | 0.004394 | -4.89 | 66413      | 1998394.28 |
| PGN1718 | <i>conserved hypothetical protein</i>                       |         |        |       |                        |                      |            |                               |                        |          |       |            |            |
| PG1779  | 0.115446                                                    | 7.46    | 18     | -1.27 | 4.67                   | Y                    |            |                               | Y                      | 0.021356 | -4.00 | 5021358    | 14094156   |
| PGN1719 | <i>conserved hypothetical protein</i>                       |         |        |       |                        |                      |            |                               |                        |          |       |            |            |
| PG1780  | 0.009141                                                    | 50.11   | 75     | -0.58 | 6.97                   | G                    |            |                               | Y                      | 0.056585 | -0.70 | 34044385.5 | 49261362.3 |
| PGN1721 | <i>bioF-3 8-amino-7-oxononanoate synthase</i>               |         |        |       |                        |                      |            |                               |                        |          |       |            |            |
| PG1781  | 0.075029                                                    | 29.85   | 49.5   | -0.73 | 6.31                   | Y                    |            |                               | G                      | 0.001742 | -1.04 | 10588055   | 21613114.2 |
| PGN1722 | <i>udk uridine kinase</i>                                   |         |        |       |                        |                      |            |                               |                        |          |       |            |            |
| PG1782  | 0.773021                                                    | 2.13    | 6.5    | -1.61 | 3.11                   | Y                    |            |                               | G                      | 0.000137 | -4.41 | 66413      | 1396592.2  |
| PGN1723 | <i>hypothetical protein PG_1782</i>                         |         |        |       |                        |                      |            |                               |                        |          |       |            |            |
| PG1783  | 0.327141                                                    | 2.13    | 10.5   | -2.3  | 3.66                   | Y                    |            |                               | G                      | 0.004124 | -6.14 | 66413      | 4759324.83 |
| PGN1724 | <i>glycosyl transferase group 2 family protein</i>          |         |        |       |                        |                      |            |                               |                        |          |       |            |            |
| PG1841  | 0.600049                                                    | 2.13    | 4      | -0.91 | 2.62                   | Y                    |            |                               | Y                      | 0.052108 | -1.75 | 66413      | 1228055    |
| PGN1730 | <i>conserved hypothetical protein</i>                       |         |        |       |                        |                      |            |                               |                        |          |       |            |            |
| PG1837  | 0.000000                                                    | 2785.95 | 2980   | -0.1  | 12.49                  | G                    |            |                               | R                      | 0.009495 | 0.24  | 3.7254e+09 | 3.1681e+09 |
| PGN1733 | <i>hemagglutinin protein HagA</i>                           |         |        |       |                        |                      |            |                               |                        |          |       |            |            |
| PG1835  | 0.730633                                                    | 93.82   | 96     | -0.03 | 7.57                   | Y                    |            |                               | G                      | 0.009010 | -0.51 | 53666057   | 75689609   |
| PGN1735 | <i>lipoprotein putative</i>                                 |         |        |       |                        |                      |            |                               |                        |          |       |            |            |
| PG1834  | 0.751373                                                    | 73.57   | 82     | -0.16 | 7.28                   | Y                    |            |                               | Y                      | 0.105603 | 0.08  | 36875983   | 34708688.2 |
| PGN1736 | <i>glycogen synthase-related protein</i>                    |         |        |       |                        |                      |            |                               |                        |          |       |            |            |
| PG1829  | 0.751373                                                    | 101.29  | 106.5  | -0.07 | 7.7                    | Y                    |            |                               | G                      | 0.002394 | -0.34 | 50168145.5 | 63400497.5 |
| PGN1738 | <i>long-chain-fatty-acid--CoA ligase putative</i>           |         |        |       |                        |                      |            |                               |                        |          |       |            |            |
| PG1824  | 0.000000                                                    | 1396.71 | 1782   | -0.35 | 11.63                  | G                    |            |                               | Y                      | 0.161524 | -0.01 | 812316134  | 819306250  |
| PGN1743 | <i>eno enolase</i>                                          |         |        |       |                        |                      |            |                               |                        |          |       |            |            |
| PG1823  | 0.278503                                                    | 11.73   | 12.5   | -0.09 | 4.6                    | Y                    |            |                               | Y                      | 0.067909 | -3.62 | 7096590.5  | 14065854.1 |
| PGN1744 | <i>hypothetical protein PG_1823</i>                         |         |        |       |                        |                      |            |                               |                        |          |       |            |            |
| PG1816  | 0.770282                                                    | 147.13  | 144    | 0.03  | 8.19                   | Y                    |            |                               | Y                      | 0.191557 | -0.01 | 86281992.5 | 85989385.2 |
| PGN1749 | <i>NAD(P)H dehydrogenase quinone family putative</i>        |         |        |       |                        |                      |            |                               |                        |          |       |            |            |
| PG1815  | 0.074495                                                    | 2.13    | 13.5   | -2.66 | 3.97                   | Y                    |            |                               | G                      | 0.001693 | -6.34 | 66413      | 5394059.2  |
| PGN1750 | <i>kdsB 3-deoxy-D-manno-octulosonate cytidyltransferase</i> |         |        |       |                        |                      |            |                               |                        |          |       |            |            |
| PG1814  | 0.630045                                                    | 2.13    | 8      | -1.91 | 3.34                   | Y                    |            |                               | G                      | 0.001293 | -5.19 | 66413      | 2414134.43 |
| PGN1751 | <i>dnaG DNA primase</i>                                     |         |        |       |                        |                      |            |                               |                        |          |       |            |            |

| TIGR    | PgSgFn / Pg Spectral Count                                                                   |        |       |                        |                      |            |         | PgSgFn / Pg Protein Intensity |        |          |       |            |            |
|---------|----------------------------------------------------------------------------------------------|--------|-------|------------------------|----------------------|------------|---------|-------------------------------|--------|----------|-------|------------|------------|
|         | q-value                                                                                      | PgSgFn | Pg    | log <sub>2</sub> Ratio | log <sub>2</sub> Sum | Regulation | q-value | log <sub>2</sub> Ratio        | PgSgFn | Pg       |       |            |            |
| PG1813  | 0.240620                                                                                     | 77.83  | 60    | 0.38                   | 7.11                 | Y          |         |                               | R      | 0.008974 | 0.57  | 172748248  | 116256837  |
| PGN1752 | <i>ferredoxin 4Fe-4S</i>                                                                     |        |       |                        |                      |            |         |                               |        |          |       |            |            |
| PG1812  | 0.000000                                                                                     | 2008.7 | 1668  | 0.27                   | 11.84                | R          |         |                               | Y      | 0.146675 | -0.06 | 1.3809e+09 | 1.4301e+09 |
| PGN1753 | <i>2-oxoglutarate oxidoreductase alpha subunit</i>                                           |        |       |                        |                      |            |         |                               |        |          |       |            |            |
| PG1810  | 0.000000                                                                                     | 953.17 | 689.5 | 0.47                   | 10.68                | R          |         |                               | R      | 0.006414 | 0.28  | 529339848  | 436197483  |
| PGN1755 | <i>2-oxoglutarate oxidoreductase beta subunit</i>                                            |        |       |                        |                      |            |         |                               |        |          |       |            |            |
| PG1809  | 0.014718                                                                                     | 331.58 | 267.5 | 0.31                   | 9.23                 | Y          |         |                               | Y      | 0.121255 | -0.13 | 269860925  | 293145522  |
| PGN1756 | <i>2-oxoglutarate oxidoreductase gamma subunit</i>                                           |        |       |                        |                      |            |         |                               |        |          |       |            |            |
| PG1808  | 0.004976                                                                                     | 28.79  | 52.5  | -0.87                  | 6.35                 | G          |         |                               | Y      | 0.018791 | -0.72 | 12836718   | 20359396.4 |
| PGN1757 | <i>spoT guanosine-3'5'-bis(diphosphate) 3'-pyrophosphohydrolase</i>                          |        |       |                        |                      |            |         |                               |        |          |       |            |            |
| PG1806  | 0.678703                                                                                     | 59.71  | 60    | -0.01                  | 6.9                  | Y          |         |                               | Y      | 0.071676 | -0.13 | 43735822.5 | 48316136.6 |
| PGN1759 | <i>atpI v-type ATPase subunit I</i>                                                          |        |       |                        |                      |            |         |                               |        |          |       |            |            |
| PG1805  | 0.542387                                                                                     | 46.91  | 35    | 0.42                   | 6.36                 | Y          |         |                               | Y      | 0.022021 | 0.71  | 26366774   | 16032264.2 |
| PGN1760 | <i>atpD v-type ATPase subunit D</i>                                                          |        |       |                        |                      |            |         |                               |        |          |       |            |            |
| PG1804  | 0.000000                                                                                     | 425.41 | 554   | -0.38                  | 9.94                 | G          |         |                               | Y      | 0.045407 | -0.14 | 234979920  | 257968578  |
| PGN1761 | <i>atpB v-type ATPase subunit B</i>                                                          |        |       |                        |                      |            |         |                               |        |          |       |            |            |
| PG1803  | 0.358444                                                                                     | 291.07 | 311   | -0.1                   | 9.23                 | Y          |         |                               | Y      | 0.028659 | -0.26 | 214214809  | 257611159  |
| PGN1762 | <i>atpA v-type ATPase subunit A</i>                                                          |        |       |                        |                      |            |         |                               |        |          |       |            |            |
| PG1802  | 0.495376                                                                                     | 102.35 | 106   | -0.05                  | 7.7                  | Y          |         |                               | Y      | 0.171340 | -0.03 | 49977891   | 50740209.2 |
| PGN1763 | <i>hypothetical protein PG_1802</i>                                                          |        |       |                        |                      |            |         |                               |        |          |       |            |            |
| PG1801  | 0.000924                                                                                     | 311.33 | 275.5 | 0.18                   | 9.2                  | R          |         |                               | Y      | 0.023375 | -0.38 | 149135893  | 196047434  |
| PGN1764 | <i>v-type ATPase subunit E putative</i>                                                      |        |       |                        |                      |            |         |                               |        |          |       |            |            |
| PG1798  | 0.166597                                                                                     | 180.19 | 211   | -0.23                  | 8.61                 | Y          |         |                               | G      | 0.005813 | -0.89 | 61840661   | 115037879  |
| PGN1767 | <i>immunoreactive 46 kDa antigen PG99</i>                                                    |        |       |                        |                      |            |         |                               |        |          |       |            |            |
| PG1797  | 0.000926                                                                                     | 30.92  | 60.5  | -0.97                  | 6.51                 | G          |         |                               | G      | 0.006115 | -0.83 | 14669193   | 25482607.7 |
| PGN1768 | <i>DNA-binding response regulator/sensor histidine kinase</i>                                |        |       |                        |                      |            |         |                               |        |          |       |            |            |
| PG1794  | 0.659176                                                                                     | 19.19  | 26.5  | -0.47                  | 5.51                 | Y          |         |                               | G      | 0.000584 | -0.69 | 8018163    | 12942828.8 |
| PGN1771 | <i>polA DNA polymerase type I</i>                                                            |        |       |                        |                      |            |         |                               |        |          |       |            |            |
| PG1793  | 0.000000                                                                                     | 20.26  | 59    | -1.54                  | 6.31                 | G          |         |                               | G      | 0.000803 | -1.41 | 6841442.5  | 17907830.1 |
| PGN1772 | <i>glgB 14-alpha-glucan branching enzyme</i>                                                 |        |       |                        |                      |            |         |                               |        |          |       |            |            |
| PG1792  | 0.751373                                                                                     | 2.13   | 3     | -0.49                  | 2.36                 | Y          |         |                               | Y      | 0.052108 | -1.90 | 66413      | 1164064    |
| PGN1773 | <i>sodium/hydrogen antiporter</i>                                                            |        |       |                        |                      |            |         |                               |        |          |       |            |            |
| PG1789  | 0.715624                                                                                     | 67.17  | 63.5  | 0.08                   | 7.03                 | Y          |         |                               | Y      | 0.016911 | -0.72 | 16798585   | 26444031.3 |
| PGN1776 | <i>dcp-2 peptidyl-dipeptidase Dcp</i>                                                        |        |       |                        |                      |            |         |                               |        |          |       |            |            |
| PG1788  | 0.275068                                                                                     | 798.58 | 798   | 0                      | 10.64                | Y          |         |                               | Y      | 0.019992 | 0.03  | 870126881  | 851490387  |
| PGN1777 | <i>cysteine peptidase putative</i>                                                           |        |       |                        |                      |            |         |                               |        |          |       |            |            |
| PG1847  | 0.000000                                                                                     | 58.64  | 241.5 | -2.04                  | 8.23                 | G          |         |                               | G      | 0.002895 | -1.73 | 24592510.5 | 78673188.5 |
| PGN1780 | <i>endoribonuclease L-PSP putative</i>                                                       |        |       |                        |                      |            |         |                               |        |          |       |            |            |
| PG1848  | 0.163490                                                                                     | 13.86  | 15    | -0.11                  | 4.85                 | Y          |         |                               | Y      | 0.059025 | -3.38 | 4460240.5  | 9261481.38 |
| PGN1781 | <i>RNA methyltransferase TrmH family</i>                                                     |        |       |                        |                      |            |         |                               |        |          |       |            |            |
| PG1849  | 0.007139                                                                                     | 2.13   | 17    | -3                     | 4.26                 | Y          |         |                               | Y      | 0.024472 | -6.76 | 66413      | 9153522.35 |
| PGN1782 | <i>recN DNA repair protein RecN</i>                                                          |        |       |                        |                      |            |         |                               |        |          |       |            |            |
| PG1850  | 0.275068                                                                                     | 2.13   | 11    | -2.37                  | 3.71                 | Y          |         |                               | G      | 0.001290 | -5.77 | 66413      | 3615023.65 |
| PGN1783 | <i>hypothetical protein PG_1850</i>                                                          |        |       |                        |                      |            |         |                               |        |          |       |            |            |
| PG1851  | 0.779998                                                                                     | 44.78  | 43.5  | 0.04                   | 6.46                 | Y          |         |                               | R      | 0.003861 | 0.48  | 23148490.5 | 16665640.8 |
| PGN1784 | <i>coaBC phosphopantothenoylecysteine decarboxylase/phosphopantothenate--cysteine ligase</i> |        |       |                        |                      |            |         |                               |        |          |       |            |            |
| PG1852  | 0.411177                                                                                     | 70.37  | 76.5  | -0.12                  | 7.2                  | Y          |         |                               | Y      | 0.052108 | 0.35  | 29509355   | 23671097.2 |
| PGN1785 | <i>exonuclease</i>                                                                           |        |       |                        |                      |            |         |                               |        |          |       |            |            |



| TIGR    | PgSgFn / Pg Spectral Count                               |         |        |       |                        |                      | PgSgFn / Pg Protein Intensity |  |   |          |                        |            |            |
|---------|----------------------------------------------------------|---------|--------|-------|------------------------|----------------------|-------------------------------|--|---|----------|------------------------|------------|------------|
|         | PGN                                                      | q-value | PgSgFn | Pg    | log <sub>2</sub> Ratio | log <sub>2</sub> Sum | Regulation                    |  |   | q-value  | log <sub>2</sub> Ratio | PgSgFn     | Pg         |
| PG1853  | 0.000000                                                 | 147.13  | 231.5  | -0.65 | 8.56                   | G                    |                               |  | G | 0.001242 | -0.80                  | 64235326.5 | 111532876  |
| PGN1786 | <i>dnaN DNA polymerase III beta subunit</i>              |         |        |       |                        |                      |                               |  |   |          |                        |            |            |
| PG1855  | 0.225691                                                 | 20.26   | 33.5   | -0.73 | 5.75                   | Y                    |                               |  | Y | 0.011777 | -0.90                  | 7634542    | 14203032.2 |
| PGN1788 | <i>carboxyl-terminal protease</i>                        |         |        |       |                        |                      |                               |  |   |          |                        |            |            |
| PG1856  | 0.261642                                                 | 2.13    | 11     | -2.37 | 3.71                   | Y                    |                               |  | G | 0.005100 | -5.94                  | 66413      | 4185963    |
| PGN1789 | <i>cytidine/deoxycytidylate deaminase family protein</i> |         |        |       |                        |                      |                               |  |   |          |                        |            |            |
| PG1858  | 0.000000                                                 | 4041.92 | 2878   | 0.49  | 12.76                  | R                    |                               |  | Y | 0.017985 | 0.24                   | 1.8247e+09 | 1.5514e+09 |
| PGN1791 | <i>flavodoxin</i>                                        |         |        |       |                        |                      |                               |  |   |          |                        |            |            |
| PG1860  | 0.786353                                                 | 17.06   | 18     | -0.08 | 5.13                   | Y                    |                               |  | Y | 0.171340 | -0.03                  | 2894601.5  | 2934973.6  |
| PGN1793 | <i>conserved hypothetical protein</i>                    |         |        |       |                        |                      |                               |  |   |          |                        |            |            |
| PG1864  | 0.146581                                                 | 7.46    | 16     | -1.1  | 4.55                   | Y                    |                               |  | Y | 0.022948 | -3.41                  | 1559096.5  | 4537047.78 |
| PGN1796 | <i>leucine-rich protein</i>                              |         |        |       |                        |                      |                               |  |   |          |                        |            |            |
| PG1870  | 0.667335                                                 | 2.13    | 8      | -1.91 | 3.34                   | Y                    |                               |  | G | 0.000584 | -5.76                  | 66413      | 3579377    |
| PGN1798 | <i>methytransferase UbiE/COQ5 family</i>                 |         |        |       |                        |                      |                               |  |   |          |                        |            |            |
| PG1872  | 0.000398                                                 | 435     | 511.5  | -0.23 | 9.89                   | G                    |                               |  | G | 0.001020 | -0.49                  | 288156424  | 404923931  |
| PGN1800 | <i>hutU urocanate hydratase</i>                          |         |        |       |                        |                      |                               |  |   |          |                        |            |            |
| PG1875  | 0.773021                                                 | 2.13    | 6.5    | -1.61 | 3.11                   | Y                    |                               |  | G | 0.000969 | -4.60                  | 66413      | 1596024.03 |
| PGN1802 | <i>hemolysin</i>                                         |         |        |       |                        |                      |                               |  |   |          |                        |            |            |
| PG1876  | 0.779998                                                 | 2.13    | 6      | -1.49 | 3.02                   | Y                    |                               |  | G | 0.001022 | -5.50                  | 66413      | 2988067.43 |
| PGN1803 | <i>conserved hypothetical protein</i>                    |         |        |       |                        |                      |                               |  |   |          |                        |            |            |
| PG1877  | 0.604563                                                 | 2.13    | 4      | -0.91 | 2.62                   | Y                    |                               |  | Y | 0.052108 | -2.33                  | 66413      | 2108871.5  |
| PGN1804 | <i>nhaA Na<sup>+</sup>/H<sup>+</sup> antiporter</i>      |         |        |       |                        |                      |                               |  |   |          |                        |            |            |
| PG1878  | 0.747683                                                 | 94.89   | 98.5   | -0.05 | 7.6                    | Y                    |                               |  | Y | 0.037877 | 0.20                   | 46604670   | 40358889.5 |
| PGN1805 | <i>cysS cysteinyl-tRNA synthetase</i>                    |         |        |       |                        |                      |                               |  |   |          |                        |            |            |
| PG1879  | 0.120212                                                 | 59.71   | 71.5   | -0.26 | 7.04                   | Y                    |                               |  | Y | 0.014221 | -0.67                  | 27994037   | 45051657.8 |
| PGN1806 | <i>conserved hypothetical protein</i>                    |         |        |       |                        |                      |                               |  |   |          |                        |            |            |
| PG1881  | 0.667335                                                 | 27.72   | 34     | -0.29 | 5.95                   | Y                    |                               |  | Y | 0.179184 | 0.00                   | 25265562.5 | 25533264.5 |
| PGN1808 | <i>hypothetical protein PG_1881</i>                      |         |        |       |                        |                      |                               |  |   |          |                        |            |            |
| PG1884  | 0.001586                                                 | 24.52   | 52     | -1.08 | 6.26                   | G                    |                               |  | Y | 0.011553 | -1.01                  | 12023521.5 | 24406954.9 |
| PGN1811 | <i>alpha-L-fucosidase precursor putative</i>             |         |        |       |                        |                      |                               |  |   |          |                        |            |            |
| PG1885  | 0.197964                                                 | 45.85   | 46.5   | -0.02 | 6.53                   | Y                    |                               |  | Y | 0.055138 | -0.57                  | 18849786.5 | 27003585.2 |
| PGN1812 | <i>ppk polyphosphate kinase</i>                          |         |        |       |                        |                      |                               |  |   |          |                        |            |            |
| PG1886  | 0.786857                                                 | 49.04   | 45.5   | 0.11  | 6.56                   | Y                    |                               |  | R | 0.003429 | 1.51                   | 34212386.5 | 12070895.2 |
| PGN1813 | <i>hflX GTP-binding protein HflX</i>                     |         |        |       |                        |                      |                               |  |   |          |                        |            |            |
| PG1887  | 0.457936                                                 | 2.13    | 9.5    | -2.16 | 3.54                   | Y                    |                               |  | Y | 0.028575 | -4.80                  | 66413      | 2477130.2  |
| PGN1814 | <i>rhodanese-like domain protein</i>                     |         |        |       |                        |                      |                               |  |   |          |                        |            |            |
| PG1888  | 0.039231                                                 | 2.13    | 14.5   | -2.77 | 4.06                   | Y                    |                               |  | G | 0.000035 | -6.05                  | 66413      | 4362194.68 |
| PGN1815 | <i>conserved hypothetical protein</i>                    |         |        |       |                        |                      |                               |  |   |          |                        |            |            |
| PG1889  | 0.064048                                                 | 2.13    | 13.5   | -2.66 | 3.97                   | Y                    |                               |  | Y | 0.011359 | -6.73                  | 66413      | 7626854.9  |
| PGN1816 | <i>hypothetical protein PG_1889</i>                      |         |        |       |                        |                      |                               |  |   |          |                        |            |            |
| PG1896  | 0.161227                                                 | 125.81  | 100    | 0.33  | 7.82                   | Y                    |                               |  | Y | 0.014536 | -0.58                  | 48306032.5 | 72808450.3 |
| PGN1827 | <i>metK S-adenosylmethionine synthase</i>                |         |        |       |                        |                      |                               |  |   |          |                        |            |            |
| PG1899  | 0.295572                                                 | 114.08  | 140.5  | -0.3  | 7.99                   | Y                    |                               |  | Y | 0.137374 | -0.15                  | 94449457.5 | 102378567  |
| PGN1830 | <i>TonB-dependent receptor putative</i>                  |         |        |       |                        |                      |                               |  |   |          |                        |            |            |
| PG1900  | 0.345160                                                 | 2.13    | 10     | -2.23 | 3.6                    | Y                    |                               |  | G | 0.009482 | -5.38                  | 66413      | 2946555.1  |
| PGN1831 | <i>conserved hypothetical protein TIGR00157</i>          |         |        |       |                        |                      |                               |  |   |          |                        |            |            |
| PG1901  | 0.659176                                                 | 82.1    | 70.5   | 0.22  | 7.25                   | Y                    |                               |  | Y | 0.157620 | -0.03                  | 137298116  | 142151773  |
| PGN1832 | <i>frr ribosome recycling factor</i>                     |         |        |       |                        |                      |                               |  |   |          |                        |            |            |

| TIGR    | PgSgFn / Pg Spectral Count                            |        |       |                        |                      |            |  | PgSgFn / Pg Protein Intensity |         |                        |        |            |            |
|---------|-------------------------------------------------------|--------|-------|------------------------|----------------------|------------|--|-------------------------------|---------|------------------------|--------|------------|------------|
|         | q-value                                               | PgSgFn | Pg    | log <sub>2</sub> Ratio | log <sub>2</sub> Sum | Regulation |  |                               | q-value | log <sub>2</sub> Ratio | PgSgFn | Pg         |            |
| PG1902  | 0.000000                                              | 7.46   | 46    | -2.62                  | 5.74                 | G          |  |                               | Y       | 0.030979               | -4.26  | 6914617    | 17167752.3 |
| PGN1833 | <i>pyrH uridylylate kinase</i>                        |        |       |                        |                      |            |  |                               |         |                        |        |            |            |
| PG1903  | 0.003541                                              | 19.19  | 42.5  | -1.15                  | 5.95                 | G          |  |                               | G       | 0.004902               | -1.60  | 5316916    | 15608168.8 |
| PGN1834 | <i>conserved hypothetical protein</i>                 |        |       |                        |                      |            |  |                               |         |                        |        |            |            |
| PG1908  | 0.751373                                              | 2.13   | 3     | -0.49                  | 2.36                 | Y          |  |                               | Y       | 0.052108               | -1.91  | 66413      | 1177771.5  |
| PGN1837 | <i>hypothetical protein PG_1908</i>                   |        |       |                        |                      |            |  |                               |         |                        |        |            |            |
| PG1910  | 0.000007                                              | 154.6  | 90    | 0.78                   | 7.93                 | R          |  |                               | R       | 0.000107               | 1.39   | 221254844  | 84194010.6 |
| PGN1840 | <i>rplQ ribosomal protein L17</i>                     |        |       |                        |                      |            |  |                               |         |                        |        |            |            |
| PG1911  | 0.293852                                              | 364.64 | 339.5 | 0.1                    | 9.46                 | Y          |  |                               | R       | 0.001445               | 0.39   | 294643151  | 225134563  |
| PGN1841 | <i>rpoA DNA-directed RNA polymerase alpha subunit</i> |        |       |                        |                      |            |  |                               |         |                        |        |            |            |
| PG1912  | 0.000000                                              | 249.49 | 154   | 0.7                    | 8.66                 | R          |  |                               | Y       | 0.014416               | 0.53   | 232454843  | 163023096  |
| PGN1842 | <i>rpsD ribosomal protein S4</i>                      |        |       |                        |                      |            |  |                               |         |                        |        |            |            |
| PG1913  | 0.051394                                              | 10.66  | 7     | 0.61                   | 4.14                 | Y          |  |                               | G       | 0.008125               | -4.23  | 2665066.5  | 10292093.8 |
| PGN1843 | <i>rpsK ribosomal protein S11</i>                     |        |       |                        |                      |            |  |                               |         |                        |        |            |            |
| PG1914  | 0.015347                                              | 63.97  | 37.5  | 0.77                   | 6.66                 | Y          |  |                               | Y       | 0.161524               | 0.05   | 109327342  | 106060569  |
| PGN1844 | <i>rpsM ribosomal protein S13</i>                     |        |       |                        |                      |            |  |                               |         |                        |        |            |            |
| PG1916  | 0.348965                                              | 34.12  | 48    | -0.49                  | 6.36                 | Y          |  |                               | Y       | 0.019812               | -0.73  | 5127043.5  | 8724750.08 |
| PGN1846 | <i>infA translation initiation factor IF-1</i>        |        |       |                        |                      |            |  |                               |         |                        |        |            |            |
| PG1917  | 0.682945                                              | 36.25  | 35    | 0.05                   | 6.15                 | Y          |  |                               | Y       | 0.048151               | 0.57   | 19383361   | 12930251.1 |
| PGN1847 | <i>map methionine aminopeptidase type I</i>           |        |       |                        |                      |            |  |                               |         |                        |        |            |            |
| PG1918  | 0.786857                                              | 59.71  | 56    | 0.09                   | 6.85                 | Y          |  |                               | Y       | 0.033883               | -0.60  | 44385258   | 63999035.9 |
| PGN1848 | <i>secY preprotein translocase SecY subunit</i>       |        |       |                        |                      |            |  |                               |         |                        |        |            |            |
| PG1919  | 0.018536                                              | 99.16  | 66    | 0.59                   | 7.37                 | Y          |  |                               | Y       | 0.064220               | 0.06   | 69006032.5 | 66159447.8 |
| PGN1849 | <i>rplO ribosomal protein L15</i>                     |        |       |                        |                      |            |  |                               |         |                        |        |            |            |
| PG1920  | 0.000101                                              | 82.1   | 41.5  | 0.98                   | 6.95                 | R          |  |                               | Y       | 0.070470               | -0.20  | 83676045   | 98005710.2 |
| PGN1850 | <i>rpmD ribosomal protein L30</i>                     |        |       |                        |                      |            |  |                               |         |                        |        |            |            |
| PG1921  | 0.000004                                              | 74.63  | 35    | 1.09                   | 6.78                 | R          |  |                               | R       | 0.003984               | 1.66   | 104546723  | 32617332.9 |
| PGN1851 | <i>rpsE ribosomal protein S5</i>                      |        |       |                        |                      |            |  |                               |         |                        |        |            |            |
| PG1922  | 0.000000                                              | 180.19 | 81.5  | 1.14                   | 8.03                 | R          |  |                               | R       | 0.000206               | 1.14   | 213545194  | 96702035.3 |
| PGN1852 | <i>rplR ribosomal protein L18</i>                     |        |       |                        |                      |            |  |                               |         |                        |        |            |            |
| PG1923  | 0.010615                                              | 208.97 | 155.5 | 0.43                   | 8.51                 | Y          |  |                               | Y       | 0.097582               | 0.08   | 273099256  | 259426326  |
| PGN1853 | <i>rplF ribosomal protein L6</i>                      |        |       |                        |                      |            |  |                               |         |                        |        |            |            |
| PG1924  | 0.720393                                              | 52.24  | 46.5  | 0.17                   | 6.63                 | Y          |  |                               | Y       | 0.011407               | -0.25  | 64416207.5 | 76927560.6 |
| PGN1854 | <i>rpsH ribosomal protein S8</i>                      |        |       |                        |                      |            |  |                               |         |                        |        |            |            |
| PG1925  | 0.751373                                              | 2.13   | 7     | -1.72                  | 3.19                 | Y          |  |                               | Y       | 0.018743               | -7.10  | 66413      | 10660794.7 |
| PGN1855 | <i>rpsN ribosomal protein S14</i>                     |        |       |                        |                      |            |  |                               |         |                        |        |            |            |
| PG1926  | 0.213146                                              | 271.88 | 296.5 | -0.13                  | 9.15                 | Y          |  |                               | Y       | 0.159862               | -0.01  | 248507008  | 250360644  |
| PGN1856 | <i>rplE ribosomal protein L5</i>                      |        |       |                        |                      |            |  |                               |         |                        |        |            |            |
| PG1927  | 0.014708                                              | 76.77  | 53    | 0.53                   | 7.02                 | Y          |  |                               | Y       | 0.161524               | -0.01  | 98532529   | 105876906  |
| PGN1857 | <i>rplX ribosomal protein L24</i>                     |        |       |                        |                      |            |  |                               |         |                        |        |            |            |
| PG1928  | 0.128819                                              | 51.18  | 36    | 0.51                   | 6.45                 | Y          |  |                               | Y       | 0.014353               | 1.41   | 28809569   | 10346899.1 |
| PGN1858 | <i>rplN ribosomal protein L14</i>                     |        |       |                        |                      |            |  |                               |         |                        |        |            |            |
| PG1929  | 0.250218                                              | 6.4    | 10.5  | -0.71                  | 4.08                 | Y          |  |                               | Y       | 0.067266               | -1.76  | 30672646.5 | 7278525.4  |
| PGN1859 | <i>rpsQ ribosomal protein S17</i>                     |        |       |                        |                      |            |  |                               |         |                        |        |            |            |
| PG1930  | 0.003969                                              | 12.79  | 5.5   | 1.22                   | 4.19                 | R          |  |                               | Y       | 0.054253               | 0.20   | 12237550   | 1197596.08 |
| PGN1860 | <i>rpmC ribosomal protein L29</i>                     |        |       |                        |                      |            |  |                               |         |                        |        |            |            |
| PG1931  | 0.000007                                              | 82.1   | 38    | 1.11                   | 6.91                 | R          |  |                               | R       | 0.000505               | 1.30   | 136799112  | 55603720.1 |
| PGN1861 | <i>rplP ribosomal protein L16</i>                     |        |       |                        |                      |            |  |                               |         |                        |        |            |            |

| TIGR    | PgSgFn / Pg Spectral Count                               |         |       |                        |                      |            |         | PgSgFn / Pg Protein Intensity |        |          |       |            |            |
|---------|----------------------------------------------------------|---------|-------|------------------------|----------------------|------------|---------|-------------------------------|--------|----------|-------|------------|------------|
|         | q-value                                                  | PgSgFn  | Pg    | log <sub>2</sub> Ratio | log <sub>2</sub> Sum | Regulation | q-value | log <sub>2</sub> Ratio        | PgSgFn | Pg       |       |            |            |
| PG1932  | 0.000000                                                 | 148.2   | 76.5  | 0.95                   | 7.81                 | R          |         |                               | Y      | 0.010369 | 0.88  | 156758483  | 83626514.5 |
| PGN1862 | <i>rpsC ribosomal protein S3</i>                         |         |       |                        |                      |            |         |                               |        |          |       |            |            |
| PG1933  | 0.000000                                                 | 134.34  | 56.5  | 1.25                   | 7.58                 | R          |         |                               | Y      | 0.010105 | 1.02  | 84195719   | 40810463.2 |
| PGN1863 | <i>rplV ribosomal protein L22</i>                        |         |       |                        |                      |            |         |                               |        |          |       |            |            |
| PG1934  | 0.000000                                                 | 93.82   | 33    | 1.51                   | 6.99                 | R          |         |                               | R      | 0.004947 | 0.92  | 51522519.5 | 27912794   |
| PGN1864 | <i>rpsS ribosomal protein S19</i>                        |         |       |                        |                      |            |         |                               |        |          |       |            |            |
| PG1935  | 0.000005                                                 | 65.04   | 28    | 1.22                   | 6.54                 | R          |         |                               | R      | 0.004995 | 1.58  | 53306402   | 17715259.7 |
| PGN1865 | <i>rplB ribosomal protein L2</i>                         |         |       |                        |                      |            |         |                               |        |          |       |            |            |
| PG1936  | 0.007139                                                 | 44.78   | 21.5  | 1.06                   | 6.05                 | R          |         |                               | R      | 0.004415 | 1.07  | 24324769.5 | 11481420.3 |
| PGN1866 | <i>rplW ribosomal protein L23</i>                        |         |       |                        |                      |            |         |                               |        |          |       |            |            |
| PG1937  | 0.000000                                                 | 316.66  | 203.5 | 0.64                   | 9.02                 | R          |         |                               | R      | 0.008013 | 0.62  | 135610320  | 88373729.5 |
| PGN1867 | <i>rplD ribosomal protein L4</i>                         |         |       |                        |                      |            |         |                               |        |          |       |            |            |
| PG1938  | 0.000000                                                 | 103.42  | 54    | 0.94                   | 7.3                  | R          |         |                               | Y      | 0.040771 | 0.51  | 87274806   | 63248332.6 |
| PGN1868 | <i>rplC ribosomal protein L3</i>                         |         |       |                        |                      |            |         |                               |        |          |       |            |            |
| PG1939  | 0.000195                                                 | 113.02  | 131.5 | -0.22                  | 7.93                 | G          |         |                               | Y      | 0.115558 | 0.13  | 109702358  | 100245678  |
| PGN1869 | <i>rpsJ ribosomal protein S10</i>                        |         |       |                        |                      |            |         |                               |        |          |       |            |            |
| PG1940  | 0.000000                                                 | 1090.71 | 681.5 | 0.68                   | 10.79                | R          |         |                               | R      | 0.003109 | 0.47  | 842542931  | 608363170  |
| PGN1870 | <i>fusA translation elongation factor G</i>              |         |       |                        |                      |            |         |                               |        |          |       |            |            |
| PG1941  | 0.000135                                                 | 135.41  | 82.5  | 0.71                   | 7.77                 | R          |         |                               | R      | 0.008458 | 0.64  | 220558288  | 141832374  |
| PGN1871 | <i>rpsG ribosomal protein S7</i>                         |         |       |                        |                      |            |         |                               |        |          |       |            |            |
| PG1944  | 0.779998                                                 | 2.13    | 2.5   | -0.23                  | 2.21                 | Y          |         |                               | Y      | 0.052147 | -1.73 | 66413      | 920849.15  |
| PGN1874 | <i>aroA 3-phosphoshikimate 1-carboxyvinyltransferase</i> |         |       |                        |                      |            |         |                               |        |          |       |            |            |
| PG1947  | 0.000000                                                 | 6.4     | 38    | -2.57                  | 5.47                 | G          |         |                               | G      | 0.001876 | -4.98 | 979782.5   | 10418504.3 |
| PGN1877 | <i>TPR domain protein</i>                                |         |       |                        |                      |            |         |                               |        |          |       |            |            |
| PG1948  | 0.000040                                                 | 392.36  | 291   | 0.43                   | 9.42                 | R          |         |                               | Y      | 0.052108 | -0.16 | 199665401  | 224124566  |
| PGN1878 | <i>lipoprotein putative</i>                              |         |       |                        |                      |            |         |                               |        |          |       |            |            |
| PG1949  | 0.019015                                                 | 552.29  | 467   | 0.24                   | 9.99                 | Y          |         |                               | Y      | 0.027198 | -0.08 | 358229903  | 379840362  |
| PGN1880 | <i>mdh malate dehydrogenase</i>                          |         |       |                        |                      |            |         |                               |        |          |       |            |            |
| PG1950  | 0.037442                                                 | 2.13    | 14.5  | -2.77                  | 4.06                 | Y          |         |                               | G      | 0.004947 | -7.05 | 66413      | 9023474.08 |
| PGN1882 | <i>membrane protein putative</i>                         |         |       |                        |                      |            |         |                               |        |          |       |            |            |
| PG1951  | 0.420278                                                 | 214.3   | 188   | 0.19                   | 8.65                 | Y          |         |                               | Y      | 0.146675 | 0.03  | 114038310  | 111395139  |
| PGN1883 | <i>glnS glutaminyl-tRNA synthetase</i>                   |         |       |                        |                      |            |         |                               |        |          |       |            |            |
| PG1952  | 0.148470                                                 | 9.6     | 14    | -0.54                  | 4.56                 | Y          |         |                               | Y      | 0.082564 | -3.55 | 5915048.5  | 9591000.98 |
| PGN1884 | <i>DedA family protein</i>                               |         |       |                        |                      |            |         |                               |        |          |       |            |            |
| PG1953  | 0.161227                                                 | 25.59   | 40    | -0.64                  | 6.04                 | Y          |         |                               | G      | 0.000797 | -0.71 | 26414185.5 | 43176323.6 |
| PGN1885 | <i>YitT family protein</i>                               |         |       |                        |                      |            |         |                               |        |          |       |            |            |
| PG1956  | 0.000117                                                 | 56.51   | 100.5 | -0.83                  | 7.29                 | G          |         |                               | G      | 0.005006 | -0.91 | 27448042.5 | 51382402.5 |
| PGN1888 | <i>abfT-2 4-hydroxybutyrate CoA-transferase</i>          |         |       |                        |                      |            |         |                               |        |          |       |            |            |
| PG1959  | 0.238962                                                 | 17.06   | 8.5   | 1.01                   | 4.68                 | Y          |         |                               | Y      | 0.023533 | 2.03  | 20175360.5 | 4376314.68 |
| PGN1890 | <i>rpmG ribosomal protein L33</i>                        |         |       |                        |                      |            |         |                               |        |          |       |            |            |
| PG1960  | 0.014629                                                 | 26.65   | 11.5  | 1.21                   | 5.25                 | Y          |         |                               | Y      | 0.037877 | 0.40  | 40318142.5 | 29893885.5 |
| PGN1891 | <i>rpmB ribosomal protein L28</i>                        |         |       |                        |                      |            |         |                               |        |          |       |            |            |
| PG1961  | 0.324918                                                 | 2.13    | 10.5  | -2.3                   | 3.66                 | Y          |         |                               | G      | 0.003742 | -7.07 | 66413      | 9057518.85 |
| PGN1892 | <i>hypothetical protein PG_1961</i>                      |         |       |                        |                      |            |         |                               |        |          |       |            |            |
| PG1963  | 0.720026                                                 | 2.13    | 7.5   | -1.82                  | 3.27                 | Y          |         |                               | G      | 0.007305 | -5.46 | 66413      | 3040756.23 |
| PGN1895 | <i>Sua5/YciO/YrdC/YwC family protein</i>                 |         |       |                        |                      |            |         |                               |        |          |       |            |            |
| PG1964  | 0.779998                                                 | 2.13    | 6     | -1.49                  | 3.02                 | Y          |         |                               | G      | 0.002288 | -6.58 | 66413      | 6359505.65 |
| PGN1896 | <i>bacterial sugar transferase</i>                       |         |       |                        |                      |            |         |                               |        |          |       |            |            |

| TIGR                                                              | PgSgFn / Pg Spectral Count |         |        |       |                        |                      |            | PgSgFn / Pg Protein Intensity |                        |          |       |            |            |
|-------------------------------------------------------------------|----------------------------|---------|--------|-------|------------------------|----------------------|------------|-------------------------------|------------------------|----------|-------|------------|------------|
|                                                                   | PGN                        | q-value | PgSgFn | Pg    | log <sub>2</sub> Ratio | log <sub>2</sub> Sum | Regulation | q-value                       | log <sub>2</sub> Ratio | PgSgFn   | Pg    |            |            |
| PG1972                                                            | 0.000001                   | 400.89  | 293.5  | 0.45  | 9.44                   | R                    |            |                               | Y                      | 0.139769 | 0.03  | 424423477  | 412068199  |
| <i>PGN1904 hemagglutinin protein HagB</i>                         |                            |         |        |       |                        |                      |            |                               |                        |          |       |            |            |
| PG1974                                                            | 0.659176                   | 2.13    | 7.5    | -1.82 | 3.27                   | Y                    |            |                               | Y                      | 0.021119 | -2.68 | 66413      | 485098.575 |
| <i>PGN1905 hypothetical protein PG_1974</i>                       |                            |         |        |       |                        |                      |            |                               |                        |          |       |            |            |
| PG1975                                                            | 0.751373                   | 2.13    | 3      | -0.49 | 2.36                   | Y                    |            |                               | Y                      | 0.052108 | -3.25 | 66413      | 7462572    |
| <i>PGN1906 hemagglutinin protein HagC</i>                         |                            |         |        |       |                        |                      |            |                               |                        |          |       |            |            |
| PG1060                                                            | 0.716626                   | 109.82  | 116.5  | -0.09 | 7.82                   | Y                    |            |                               | Y                      | 0.190624 | -0.01 | 70723816   | 70890239   |
| <i>PGN1914 carboxyl-terminal protease</i>                         |                            |         |        |       |                        |                      |            |                               |                        |          |       |            |            |
| PG1175                                                            | 0.024778                   | 170.59  | 128.5  | 0.41  | 8.22                   | Y                    |            |                               | Y                      | 0.190624 | -0.01 | 124321636  | 124490549  |
| <i>PGN1916 ABC transporter ATP-binding protein putative</i>       |                            |         |        |       |                        |                      |            |                               |                        |          |       |            |            |
| PG1176                                                            | 0.001494                   | 215.37  | 157    | 0.46  | 8.54                   | R                    |            |                               | Y                      | 0.094130 | 0.10  | 200608155  | 186104202  |
| <i>PGN1917 ABC transporter ATP-binding protein putative</i>       |                            |         |        |       |                        |                      |            |                               |                        |          |       |            |            |
| PG1178                                                            | 0.420012                   | 165.26  | 192.5  | -0.22 | 8.48                   | Y                    |            |                               | G                      | 0.000462 | -0.53 | 74676286   | 108195275  |
| <i>PGN1918 hypothetical protein PG_1178</i>                       |                            |         |        |       |                        |                      |            |                               |                        |          |       |            |            |
| PG1179                                                            | 0.274290                   | 8.53    | 9.5    | -0.16 | 4.17                   | Y                    |            |                               | Y                      | 0.040104 | -3.73 | 4089757.5  | 9044701.85 |
| <i>PGN1919 conserved hypothetical protein</i>                     |                            |         |        |       |                        |                      |            |                               |                        |          |       |            |            |
| PG1180                                                            | 0.753108                   | 163.13  | 148.5  | 0.14  | 8.28                   | Y                    |            |                               | Y                      | 0.011777 | -0.18 | 86251626.5 | 97705880.5 |
| <i>PGN1920 membrane protein putative</i>                          |                            |         |        |       |                        |                      |            |                               |                        |          |       |            |            |
| PG1181                                                            | 0.773021                   | 69.3    | 76     | -0.13 | 7.18                   | Y                    |            |                               | Y                      | 0.013019 | -0.34 | 61814700.5 | 78589343.1 |
| <i>PGN1921 transcriptional regulator tetR family</i>              |                            |         |        |       |                        |                      |            |                               |                        |          |       |            |            |
| PG1983                                                            | 0.685422                   | 2.13    | 3.5    | -0.72 | 2.49                   | Y                    |            |                               | Y                      | 0.052108 | -1.86 | 66413      | 1427832.5  |
| <i>PGN1928 CRISPR-associated protein TM1791 family</i>            |                            |         |        |       |                        |                      |            |                               |                        |          |       |            |            |
| PG1984                                                            | 0.336653                   | 6.4     | 13     | -1.02 | 4.28                   | Y                    |            |                               | G                      | 0.004191 | -4.68 | 2451414.5  | 13467201.3 |
| <i>PGN1929 hypothetical protein PG_1984</i>                       |                            |         |        |       |                        |                      |            |                               |                        |          |       |            |            |
| PG1985                                                            | 0.003938                   | 51.18   | 28.5   | 0.84  | 6.32                   | R                    |            |                               | Y                      | 0.052147 | 0.15  | 34229330   | 30800901.3 |
| <i>PGN1930 CRISPR-associated protein TM1792 family</i>            |                            |         |        |       |                        |                      |            |                               |                        |          |       |            |            |
| PG1986                                                            | 0.064843                   | 30.92   | 51.5   | -0.74 | 6.36                   | Y                    |            |                               | Y                      | 0.069213 | -0.34 | 19938793.5 | 25589576.2 |
| <i>PGN1931 CRISPR-associated protein TM1793 family</i>            |                            |         |        |       |                        |                      |            |                               |                        |          |       |            |            |
| PG1987                                                            | 0.679564                   | 61.84   | 57     | 0.12  | 6.89                   | Y                    |            |                               | Y                      | 0.020429 | -0.54 | 12174883.5 | 17978212.2 |
| <i>PGN1932 CRISPR-associated protein TM1811 family</i>            |                            |         |        |       |                        |                      |            |                               |                        |          |       |            |            |
| PG1988                                                            | 0.660293                   | 2.13    | 8      | -1.91 | 3.34                   | Y                    |            |                               | G                      | 0.000003 | -6.09 | 66413      | 4470390.1  |
| <i>PGN1933 hypothetical protein PG_1988</i>                       |                            |         |        |       |                        |                      |            |                               |                        |          |       |            |            |
| PG1992                                                            | 0.274290                   | 2.13    | 10.5   | -2.3  | 3.66                   | Y                    |            |                               | G                      | 0.005850 | -5.12 | 66413      | 2374294.13 |
| <i>PGN1937 gidA glucose-inhibited division protein A</i>          |                            |         |        |       |                        |                      |            |                               |                        |          |       |            |            |
| PG1993                                                            | 0.457936                   | 6.4     | 11     | -0.78 | 4.12                   | Y                    |            |                               | Y                      | 0.076556 | -3.02 | 2679480.5  | 4510906    |
| <i>PGN1938 uvrC excinuclease ABC C subunit</i>                    |                            |         |        |       |                        |                      |            |                               |                        |          |       |            |            |
| PG1994                                                            | 0.489278                   | 15.99   | 9.5    | 0.75  | 4.67                   | Y                    |            |                               | Y                      | 0.055401 | -0.49 | 7779399    | 11401018.7 |
| <i>PGN1939 dtd D-tyrosyl-tRNA(Tyr) deacylase</i>                  |                            |         |        |       |                        |                      |            |                               |                        |          |       |            |            |
| PG1996                                                            | 0.779998                   | 74.63   | 74.5   | 0     | 7.22                   | Y                    |            |                               | G                      | 0.009969 | -0.45 | 47991143   | 65548763.4 |
| <i>PGN1941 deoC deoxyribose-phosphate aldolase</i>                |                            |         |        |       |                        |                      |            |                               |                        |          |       |            |            |
| PG1998                                                            | 0.000015                   | 20.26   | 53.5   | -1.4  | 6.2                    | G                    |            |                               | Y                      | 0.010656 | -1.32 | 10231274.5 | 24238640.8 |
| <i>PGN1943 polyprenyl synthetase</i>                              |                            |         |        |       |                        |                      |            |                               |                        |          |       |            |            |
| PG2001                                                            | 0.543202                   | 56.51   | 45.5   | 0.31  | 6.67                   | Y                    |            |                               | Y                      | 0.150663 | 0.01  | 23858934   | 23621385.3 |
| <i>PGN1946 lepB signal peptidase I</i>                            |                            |         |        |       |                        |                      |            |                               |                        |          |       |            |            |
| PG2002                                                            | 0.000002                   | 2.13    | 26.5   | -3.64 | 4.84                   | Y                    |            |                               | G                      | 0.000338 | -7.73 | 66413      | 13979544.2 |
| <i>PGN1947 dapB dihydrodipicolinate reductase</i>                 |                            |         |        |       |                        |                      |            |                               |                        |          |       |            |            |
| PG2003                                                            | 0.037030                   | 7.46    | 20.5   | -1.46 | 4.81                   | Y                    |            |                               | Y                      | 0.046400 | -3.45 | 4112177.5  | 8642341.35 |
| <i>PGN1948 dgt deoxyguanosinetriphosphate triphosphohydrolase</i> |                            |         |        |       |                        |                      |            |                               |                        |          |       |            |            |

| TIGR    | PgSgFn / Pg Spectral Count                      |         |        |       |                        |                      | PgSgFn / Pg Protein Intensity |  |   |          |                        |            |            |
|---------|-------------------------------------------------|---------|--------|-------|------------------------|----------------------|-------------------------------|--|---|----------|------------------------|------------|------------|
|         | PGN                                             | q-value | PgSgFn | Pg    | log <sub>2</sub> Ratio | log <sub>2</sub> Sum | Regulation                    |  |   | q-value  | log <sub>2</sub> Ratio | PgSgFn     | Pg         |
| PG2008  | 0.002096                                        | 13.86   | 29     | -1.07 | 5.42                   | G                    |                               |  | G | 0.007643 | -4.21                  | 2395208    | 11226727.7 |
| PGN1953 | <i>TonB-dependent receptor putative</i>         |         |        |       |                        |                      |                               |  |   |          |                        |            |            |
| PG2010  | 0.120637                                        | 170.59  | 196    | -0.2  | 8.52                   | Y                    |                               |  | Y | 0.014416 | -0.70                  | 93241069   | 153436269  |
| PGN1955 | <i>phosphomannomutase putative</i>              |         |        |       |                        |                      |                               |  |   |          |                        |            |            |
| PG2014  | 0.006294                                        | 15.99   | 13.5   | 0.24  | 4.88                   | R                    |                               |  | Y | 0.053384 | -3.41                  | 3398159.5  | 6710452.83 |
| PGN1960 | <i>cas1 CRISPR-associated protein Cas1</i>      |         |        |       |                        |                      |                               |  |   |          |                        |            |            |
| PG2015  | 0.692989                                        | 2.13    | 3.5    | -0.72 | 2.49                   | Y                    |                               |  | Y | 0.053629 | -1.32                  | 66413      | 528416.95  |
| PGN1961 | <i>cas4 CRISPR-associated protein Cas4</i>      |         |        |       |                        |                      |                               |  |   |          |                        |            |            |
| PG2020  | 0.015659                                        | 40.52   | 62     | -0.61 | 6.68                   | Y                    |                               |  | G | 0.009634 | -0.62                  | 29570619   | 44725268.5 |
| PGN1966 | <i>CRISPR-associated protein TM1814 family</i>  |         |        |       |                        |                      |                               |  |   |          |                        |            |            |
| PG2021  | 0.751373                                        | 2.13    | 7      | -1.72 | 3.19                   | Y                    |                               |  | Y | 0.012891 | -3.20                  | 66413      | 658919.45  |
| PGN1967 | <i>conserved hypothetical protein</i>           |         |        |       |                        |                      |                               |  |   |          |                        |            |            |
| PG2022  | 0.001214                                        | 2.13    | 19     | -3.16 | 4.4                    | Y                    |                               |  | G | 0.004394 | -7.52                  | 66413      | 12382281.7 |
| PGN1968 | <i>hypothetical protein PG_2022</i>             |         |        |       |                        |                      |                               |  |   |          |                        |            |            |
| PG2023  | 0.008866                                        | 21.32   | 43.5   | -1.03 | 6.02                   | G                    |                               |  | Y | 0.063017 | -0.31                  | 13119018   | 16010004   |
| PGN1969 | <i>fmt methionyl-tRNA formyltransferase</i>     |         |        |       |                        |                      |                               |  |   |          |                        |            |            |
| PG2026  | 0.066043                                        | 11.73   | 15     | -0.35 | 4.74                   | Y                    |                               |  | Y | 0.083272 | -3.71                  | 7317207    | 12183251   |
| PGN1973 | <i>phosphoglycerate mutase family protein</i>   |         |        |       |                        |                      |                               |  |   |          |                        |            |            |
| PG2029  | 0.000000                                        | 638.65  | 479    | 0.41  | 10.13                  | R                    |                               |  | Y | 0.017132 | -0.20                  | 563989676  | 646264294  |
| PGN1976 | <i>hypothetical protein PG_2029</i>             |         |        |       |                        |                      |                               |  |   |          |                        |            |            |
| PG2031  | 0.543202                                        | 2.13    | 9      | -2.08 | 3.48                   | Y                    |                               |  | G | 0.000705 | -6.36                  | 66413      | 5401870.53 |
| PGN1978 | <i>hypothetical protein PG_2031</i>             |         |        |       |                        |                      |                               |  |   |          |                        |            |            |
| PG2033  | 0.487462                                        | 58.64   | 68.5   | -0.22 | 6.99                   | Y                    |                               |  | G | 0.006530 | -0.38                  | 26484639   | 34469447.4 |
| PGN1980 | <i>gluD glutamate synthase small subunit</i>    |         |        |       |                        |                      |                               |  |   |          |                        |            |            |
| PG2034  | 0.018560                                        | 33.05   | 57.5   | -0.8  | 6.5                    | Y                    |                               |  | Y | 0.011984 | -0.61                  | 19134022.5 | 29387311.2 |
| PGN1981 | <i>oxidoreductase FAD-binding putative</i>      |         |        |       |                        |                      |                               |  |   |          |                        |            |            |
| PG2041  | 0.000750                                        | 2.13    | 20     | -3.23 | 4.47                   | Y                    |                               |  | G | 0.001602 | -7.29                  | 66413      | 10357109.1 |
| PGN1987 | <i>hypothetical protein PG_2041</i>             |         |        |       |                        |                      |                               |  |   |          |                        |            |            |
| PG2042  | 0.102154                                        | 2.13    | 13     | -2.61 | 3.92                   | Y                    |                               |  | G | 0.004884 | -7.10                  | 66413      | 9286634.63 |
| PGN1988 | <i>thioredoxin family protein</i>               |         |        |       |                        |                      |                               |  |   |          |                        |            |            |
| PG2043  | 0.006122                                        | 8.53    | 23     | -1.43 | 4.98                   | G                    |                               |  | Y | 0.070470 | -3.56                  | 5132375.5  | 9899330.5  |
| PGN1989 | <i>conserved hypothetical protein TIGR00486</i> |         |        |       |                        |                      |                               |  |   |          |                        |            |            |
| PG2044  | 0.130076                                        | 113.02  | 97     | 0.22  | 7.71                   | Y                    |                               |  | Y | 0.159862 | 0.04                   | 91163476   | 85590563.3 |
| PGN1990 | <i>conserved hypothetical protein</i>           |         |        |       |                        |                      |                               |  |   |          |                        |            |            |
| PG2046  | 0.779998                                        | 2.13    | 2.5    | -0.23 | 2.21                   | Y                    |                               |  | Y | 0.052192 | -1.55                  | 66413      | 935077     |
| PGN1991 | <i>conserved hypothetical protein</i>           |         |        |       |                        |                      |                               |  |   |          |                        |            |            |
| PG2048  | 0.000037                                        | 2.13    | 23.5   | -3.46 | 4.68                   | Y                    |                               |  | G | 0.001242 | -6.22                  | 66413      | 4943238.33 |
| PGN1993 | <i>hypothetical protein PG_2048</i>             |         |        |       |                        |                      |                               |  |   |          |                        |            |            |
| PG2049  | 0.522042                                        | 7.46    | 10     | -0.42 | 4.13                   | Y                    |                               |  | Y | 0.060576 | -3.01                  | 2417562    | 6791311.73 |
| PGN1994 | <i>hypothetical protein PG_2049</i>             |         |        |       |                        |                      |                               |  |   |          |                        |            |            |
| PG2050  | 0.000000                                        | 592.8   | 340.5  | 0.8   | 9.87                   | R                    |                               |  | Y | 0.062174 | 0.17                   | 454854962  | 406919387  |
| PGN1995 | <i>hypothetical protein PG_2050</i>             |         |        |       |                        |                      |                               |  |   |          |                        |            |            |
| PG2052  | 0.751373                                        | 53.31   | 58.5   | -0.13 | 6.8                    | Y                    |                               |  | G | 0.000137 | -0.74                  | 21452900   | 35943225   |
| PGN1996 | <i>dapA dihydrodipicolinate synthase</i>        |         |        |       |                        |                      |                               |  |   |          |                        |            |            |
| PG2053  | 0.751373                                        | 2.13    | 7      | -1.72 | 3.19                   | Y                    |                               |  | G | 0.003242 | -6.76                  | 66413      | 7282581.5  |
| PGN1997 | <i>bioD dethiobiotin synthase</i>               |         |        |       |                        |                      |                               |  |   |          |                        |            |            |
| PG2054  | 0.175055                                        | 104.49  | 81.5   | 0.36  | 7.54                   | Y                    |                               |  | R | 0.005100 | 0.51                   | 139510382  | 98101427   |
| PGN1998 | <i>lipoprotein PG3</i>                          |         |        |       |                        |                      |                               |  |   |          |                        |            |            |

| TIGR    | PgSgFn / Pg Spectral Count                                                                      |         |        |       |                        |                      | PgSgFn / Pg Protein Intensity |         |                        |          |       |            |            |
|---------|-------------------------------------------------------------------------------------------------|---------|--------|-------|------------------------|----------------------|-------------------------------|---------|------------------------|----------|-------|------------|------------|
|         | PGN                                                                                             | q-value | PgSgFn | Pg    | log <sub>2</sub> Ratio | log <sub>2</sub> Sum | Regulation                    | q-value | log <sub>2</sub> Ratio | PgSgFn   | Pg    |            |            |
| PG2055  | 0.000021                                                                                        | 505.37  | 579.5  | -0.2  | 10.08                  | G                    |                               |         | Y                      | 0.099350 | 0.10  | 247119707  | 232628439  |
| PGN1999 | <i>dihydroorotate dehydrogenase family protein</i>                                              |         |        |       |                        |                      |                               |         |                        |          |       |            |            |
| PG0054  | 0.007772                                                                                        | 7.46    | 23     | -1.62 | 4.93                   | G                    |                               |         | G                      | 0.007267 | -4.53 | 3651532.5  | 14866260.6 |
| PGN2003 | <i>recJ single-stranded-DNA-specific exonuclease RecJ</i>                                       |         |        |       |                        |                      |                               |         |                        |          |       |            |            |
| PG0056  | 0.000000                                                                                        | 56.51   | 155.5  | -1.46 | 7.73                   | G                    |                               |         | G                      | 0.009093 | -0.70 | 35232930   | 57855964.6 |
| PGN2005 | <i>hypothetical protein PG_0056</i>                                                             |         |        |       |                        |                      |                               |         |                        |          |       |            |            |
| PG0057  | 0.102520                                                                                        | 46.91   | 30     | 0.64  | 6.27                   | Y                    |                               |         | G                      | 0.003925 | -0.93 | 10654428.5 | 20009402.7 |
| PGN2006 | <i>pncB nicotinate phosphoribosyltransferase</i>                                                |         |        |       |                        |                      |                               |         |                        |          |       |            |            |
| PG0058  | 0.214806                                                                                        | 8.53    | 11.5   | -0.43 | 4.32                   | Y                    |                               |         | Y                      | 0.130581 | -1.99 | 3853200    | 2621307.7  |
| PGN2007 | <i>nadD nicotinate (nicotinamide) nucleotide adenyllyltransferase</i>                           |         |        |       |                        |                      |                               |         |                        |          |       |            |            |
| PG0059  | 0.074014                                                                                        | 2.13    | 13.5   | -2.66 | 3.97                   | Y                    |                               |         | G                      | 0.002733 | -7.14 | 66413      | 9449248.95 |
| PGN2008 | <i>hypothetical protein PG_0059</i>                                                             |         |        |       |                        |                      |                               |         |                        |          |       |            |            |
| PG0061  | 0.000003                                                                                        | 2.13    | 26     | -3.61 | 4.81                   | Y                    |                               |         | G                      | 0.002069 | -5.98 | 66413      | 4208187    |
| PGN2010 | <i>yngK-1 yngK protein</i>                                                                      |         |        |       |                        |                      |                               |         |                        |          |       |            |            |
| PG0063  | 0.019015                                                                                        | 55.44   | 82     | -0.56 | 7.1                    | Y                    |                               |         | G                      | 0.001018 | -0.55 | 29714679.5 | 43333857.2 |
| PGN2012 | <i>outer membrane efflux protein</i>                                                            |         |        |       |                        |                      |                               |         |                        |          |       |            |            |
| PG0064  | 0.753725                                                                                        | 73.57   | 82.5   | -0.17 | 7.29                   | Y                    |                               |         | Y                      | 0.025864 | -0.37 | 38719086.5 | 50591089   |
| PGN2013 | <i>heavy metal efflux pump CzxA family</i>                                                      |         |        |       |                        |                      |                               |         |                        |          |       |            |            |
| PG0069  | 0.000330                                                                                        | 33.05   | 66.5   | -1.01 | 6.64                   | G                    |                               |         | G                      | 0.004225 | -1.64 | 6702207    | 21133011.5 |
| PGN2017 | <i>conserved hypothetical protein</i>                                                           |         |        |       |                        |                      |                               |         |                        |          |       |            |            |
| PG0070  | 0.293852                                                                                        | 113.02  | 139    | -0.3  | 7.98                   | Y                    |                               |         | Y                      | 0.189687 | -0.08 | 123457042  | 124340870  |
| PGN2018 | <i>lpxA acyl-(acyl-carrier-protein)-UDP-N-acetylglucosamine acyltransferase</i>                 |         |        |       |                        |                      |                               |         |                        |          |       |            |            |
| PG0071  | 0.070322                                                                                        | 232.43  | 191    | 0.28  | 8.73                   | Y                    |                               |         | Y                      | 0.029655 | 0.17  | 158957831  | 141358729  |
| PGN2019 | <i>UDP-3-O-acyl-GlcNAc deacetylase/beta-hydroxyacyl-[acyl carrier protein] dehydratase FabZ</i> |         |        |       |                        |                      |                               |         |                        |          |       |            |            |
| PG0072  | 0.123913                                                                                        | 9.6     | 15.5   | -0.69 | 4.65                   | Y                    |                               |         | Y                      | 0.140843 | -2.96 | 13095121.5 | 9569772.68 |
| PGN2020 | <i>lpxD UDP-3-O-[3-hydroxymyristoyl] glucosamine N-acyltransferase</i>                          |         |        |       |                        |                      |                               |         |                        |          |       |            |            |
| PG0073  | 0.000003                                                                                        | 36.25   | 81     | -1.16 | 6.87                   | G                    |                               |         | G                      | 0.008013 | -1.60 | 18036049.5 | 56275583.9 |
| PGN2021 | <i>orotidine 5'-monophosphate decarboxylase</i>                                                 |         |        |       |                        |                      |                               |         |                        |          |       |            |            |
| PG0074  | 0.039231                                                                                        | 2.13    | 14.5   | -2.77 | 4.06                   | Y                    |                               |         | G                      | 0.005850 | -6.63 | 66413      | 6798445.45 |
| PGN2022 | <i>prfA peptide chain release factor 1</i>                                                      |         |        |       |                        |                      |                               |         |                        |          |       |            |            |
| PG0075  | 0.773021                                                                                        | 38.38   | 33     | 0.22  | 6.16                   | Y                    |                               |         | Y                      | 0.071070 | -0.07 | 18875362   | 19857998   |
| PGN2023 | <i>phosphoribosylformylglycinamide cyclo-ligase putative</i>                                    |         |        |       |                        |                      |                               |         |                        |          |       |            |            |
| PG0076  | 0.339867                                                                                        | 25.59   | 38     | -0.57 | 5.99                   | Y                    |                               |         | G                      | 0.003925 | -1.25 | 8922888    | 20550311.2 |
| PGN2024 | <i>N-acetylmuramoyl-L-alanine amidase family 4</i>                                              |         |        |       |                        |                      |                               |         |                        |          |       |            |            |
| PG0078  | 0.423387                                                                                        | 2.13    | 9.5    | -2.16 | 3.54                   | Y                    |                               |         | G                      | 0.000770 | -4.65 | 66413      | 1654452.73 |
| PGN2025 | <i>conserved hypothetical protein</i>                                                           |         |        |       |                        |                      |                               |         |                        |          |       |            |            |
| PG0079  | 0.720026                                                                                        | 24.52   | 30.5   | -0.31 | 5.78                   | Y                    |                               |         | Y                      | 0.013019 | -0.51 | 13733489   | 19785107.4 |
| PGN2026 | <i>abortive infection protein putative</i>                                                      |         |        |       |                        |                      |                               |         |                        |          |       |            |            |
| PG0081  | 0.327141                                                                                        | 2.13    | 10.5   | -2.3  | 3.66                   | Y                    |                               |         | G                      | 0.000008 | -5.40 | 66413      | 2771212.03 |
| PGN2028 | <i>hypothetical protein PG_0081</i>                                                             |         |        |       |                        |                      |                               |         |                        |          |       |            |            |
| PG0082  | 0.345160                                                                                        | 2.13    | 10     | -2.23 | 3.6                    | Y                    |                               |         | G                      | 0.007499 | -6.56 | 66413      | 6541651.33 |
| PGN2029 | <i>hypothetical protein PG_0082</i>                                                             |         |        |       |                        |                      |                               |         |                        |          |       |            |            |
| PG0083  | 0.600049                                                                                        | 2.13    | 8.5    | -2    | 3.41                   | Y                    |                               |         | G                      | 0.005822 | -5.90 | 66413      | 4094680.98 |
| PGN2030 | <i>hypothetical protein PG_0083</i>                                                             |         |        |       |                        |                      |                               |         |                        |          |       |            |            |
| PG0084  | 0.001057                                                                                        | 12.79   | 30     | -1.23 | 5.42                   | G                    |                               |         | G                      | 0.007090 | -4.57 | 4801173.5  | 20313189.6 |
| PGN2031 | <i>sda L-serine dehydratase iron-sulfur-dependent single chain form</i>                         |         |        |       |                        |                      |                               |         |                        |          |       |            |            |
| PG0086  | 0.786859                                                                                        | 78.9    | 78     | 0.02  | 7.29                   | Y                    |                               |         | Y                      | 0.063017 | 0.27  | 65733379.5 | 53068337.6 |
| PGN2033 | <i>ATP-dependent RNA helicase DEAD/DEAH box family</i>                                          |         |        |       |                        |                      |                               |         |                        |          |       |            |            |



| TIGR    | PgSgFn / Pg Spectral Count                                       |          |        |        |                        |                      |            | PgSgFn / Pg Protein Intensity |                        |            |            |  |
|---------|------------------------------------------------------------------|----------|--------|--------|------------------------|----------------------|------------|-------------------------------|------------------------|------------|------------|--|
|         | PGN                                                              | q-value  | PgSgFn | Pg     | log <sub>2</sub> Ratio | log <sub>2</sub> Sum | Regulation | q-value                       | log <sub>2</sub> Ratio | PgSgFn     | Pg         |  |
| PG0087  |                                                                  | 0.604563 | 22.39  | 15     | 0.58                   | 5.22                 | Y ●● Y     | 0.026006                      | 0.38                   | 11789638.5 | 9189558.08 |  |
| PGN2034 | <i>SIS domain protein</i>                                        |          |        |        |                        |                      |            |                               |                        |            |            |  |
| PG0088  |                                                                  | 0.634798 | 2.13   | 8      | -1.91                  | 3.34                 | Y ●● Y     | 0.017839                      | -4.91                  | 66413      | 2295229.18 |  |
| PGN2035 | <i>peptidase M16 family</i>                                      |          |        |        |                        |                      |            |                               |                        |            |            |  |
| PG0090  |                                                                  | 0.000000 | 735.67 | 561    | 0.39                   | 10.34                | R ●● Y     | 0.086344                      | 0.12                   | 1.0448e+09 | 959449222  |  |
| PGN2037 | <i>Dps family protein</i>                                        |          |        |        |                        |                      |            |                               |                        |            |            |  |
| PG0091  |                                                                  | 0.779998 | 2.13   | 6      | -1.49                  | 3.02                 | Y ●● Y     | 0.014353                      | -6.14                  | 66413      | 5198757    |  |
| PGN2038 | <i>transporter putative</i>                                      |          |        |        |                        |                      |            |                               |                        |            |            |  |
| PG0092  |                                                                  | 0.608229 | 2.13   | 8.5    | -2                     | 3.41                 | Y ●● G     | 0.003861                      | -4.38                  | 66413      | 1398459.65 |  |
| PGN2039 | <i>transporter putative</i>                                      |          |        |        |                        |                      |            |                               |                        |            |            |  |
| PG0093  |                                                                  | 0.033250 | 10.66  | 19.5   | -0.87                  | 4.91                 | Y ●● Y     | 0.055854                      | -4.10                  | 9427385    | 17704887.1 |  |
| PGN2040 | <i>HlyD family secretion protein</i>                             |          |        |        |                        |                      |            |                               |                        |            |            |  |
| PG0094  |                                                                  | 0.000644 | 60.77  | 97     | -0.67                  | 7.3                  | G ●● Y     | 0.014959                      | -0.77                  | 30281790   | 49870406.1 |  |
| PGN2041 | <i>outer membrane efflux protein putative</i>                    |          |        |        |                        |                      |            |                               |                        |            |            |  |
| PG0095  |                                                                  | 0.461600 | 29.85  | 40.5   | -0.44                  | 6.14                 | Y ●● Y     | 0.149560                      | -0.55                  | 11203537   | 12812205.7 |  |
| PGN2042 | <i>mutS DNA mismatch repair protein MutS</i>                     |          |        |        |                        |                      |            |                               |                        |            |            |  |
| PG0097  |                                                                  | 0.000000 | 27.72  | 156    | -2.49                  | 7.52                 | G ●● G     | 0.004061                      | -1.65                  | 7774283.5  | 24665816.7 |  |
| PGN2043 | <i>conserved hypothetical protein TIGR01033</i>                  |          |        |        |                        |                      |            |                               |                        |            |            |  |
| PG0099  |                                                                  | 0.408616 | 77.83  | 96.5   | -0.31                  | 7.45                 | Y ●● Y     | 0.171340                      | -0.01                  | 63339718   | 61121513.1 |  |
| PGN2045 | <i>pheT phenylalanyl-tRNA synthetase beta subunit</i>            |          |        |        |                        |                      |            |                               |                        |            |            |  |
| PG2072  |                                                                  | 0.383939 | 2.13   | 10     | -2.23                  | 3.6                  | Y ●● G     | 0.007304                      | -5.60                  | 66413      | 3349148.5  |  |
| PGN2050 | <i>UvrD/REP helicase domain protein</i>                          |          |        |        |                        |                      |            |                               |                        |            |            |  |
| PG2070  |                                                                  | 0.000115 | 2.13   | 22     | -3.37                  | 4.59                 | Y ●● G     | 0.000503                      | -6.72                  | 66413      | 6942008.15 |  |
| PGN2052 | <i>hypothetical protein PG_2070</i>                              |          |        |        |                        |                      |            |                               |                        |            |            |  |
| PG2069  |                                                                  | 0.000000 | 2.13   | 30.5   | -3.84                  | 5.03                 | Y ●● G     | 0.004394                      | -7.46                  | 66413      | 11891090.5 |  |
| PGN2053 | <i>oxidoreductase short chain dehydrogenase/reductase family</i> |          |        |        |                        |                      |            |                               |                        |            |            |  |
| PG2068  |                                                                  | 0.774795 | 49.04  | 55     | -0.17                  | 6.7                  | Y ●● G     | 0.001091                      | -0.66                  | 43647173.5 | 68648890.9 |  |
| PGN2054 | <i>tagD glycerol-3-phosphate cytidyltransferase</i>              |          |        |        |                        |                      |            |                               |                        |            |            |  |
| PG2067  |                                                                  | 0.009704 | 50.11  | 70.5   | -0.49                  | 6.91                 | G ●● G     | 0.004884                      | -0.71                  | 17859577   | 29396163.2 |  |
| PGN2055 | <i>pdxA pyridoxal phosphate biosynthetic protein PdxA</i>        |          |        |        |                        |                      |            |                               |                        |            |            |  |
| PG2066  |                                                                  | 0.000026 | 28.79  | 65     | -1.17                  | 6.55                 | G ●● G     | 0.001876                      | -1.16                  | 13488378.5 | 29822596.8 |  |
| PGN2056 | <i>lipoprotein putative</i>                                      |          |        |        |                        |                      |            |                               |                        |            |            |  |
| PG2065  |                                                                  | 0.779998 | 2.13   | 6      | -1.49                  | 3.02                 | Y ●● G     | 0.000107                      | -5.82                  | 66413      | 3716387.5  |  |
| PGN2057 | <i>conserved hypothetical protein TIGR00048</i>                  |          |        |        |                        |                      |            |                               |                        |            |            |  |
| PG2062  |                                                                  | 0.012889 | 30.92  | 56     | -0.86                  | 6.44                 | Y ●● G     | 0.005934                      | -0.91                  | 21928101.5 | 40467281.9 |  |
| PGN2060 | <i>hisS histidyl-tRNA synthetase</i>                             |          |        |        |                        |                      |            |                               |                        |            |            |  |
| PG2061  |                                                                  | 0.175055 | 2.13   | 12     | -2.49                  | 3.82                 | Y ●● G     | 0.000584                      | -6.44                  | 66413      | 5731359.98 |  |
| PGN2061 | <i>folA dihydrofolate reductase</i>                              |          |        |        |                        |                      |            |                               |                        |            |            |  |
| PG2060  |                                                                  | 0.770282 | 27.72  | 23     | 0.27                   | 5.66                 | Y ●● Y     | 0.168269                      | 0.11                   | 18920534.5 | 18087549.3 |  |
| PGN2062 | <i>thyA thymidylate synthase</i>                                 |          |        |        |                        |                      |            |                               |                        |            |            |  |
| PG2197  |                                                                  | 0.039231 | 2.13   | 14.5   | -2.77                  | 4.06                 | Y ●● G     | 0.006427                      | -7.87                  | 66413      | 16091032.2 |  |
| PGN2064 | <i>conserved hypothetical protein</i>                            |          |        |        |                        |                      |            |                               |                        |            |            |  |
| PG2024  |                                                                  | 0.000000 | 1923.4 | 1976.5 | -0.04                  | 11.93                | G ●● R     | 0.007107                      | 0.27                   | 2.6133e+09 | 2.1735e+09 |  |
| PGN2065 | <i>hagE hemagglutinin protein HagE</i>                           |          |        |        |                        |                      |            |                               |                        |            |            |  |
| PG2199  |                                                                  | 0.430466 | 2.13   | 9.5    | -2.16                  | 3.54                 | Y ●● G     | 0.009306                      | -5.38                  | 66413      | 2938118.5  |  |
| PGN2066 | <i>ABC transporter ATP-binding protein putative</i>              |          |        |        |                        |                      |            |                               |                        |            |            |  |
| PG2200  |                                                                  | 0.779998 | 20.26  | 19.5   | 0.06                   | 5.31                 | Y ●● Y     | 0.135130                      | -0.02                  | 10354916   | 8570897.38 |  |
| PGN2067 | <i>TPR domain protein</i>                                        |          |        |        |                        |                      |            |                               |                        |            |            |  |

| TIGR    | PgSgFn / Pg Spectral Count                          |         |        |       |                        |                      | PgSgFn / Pg Protein Intensity                                                                                                                                              |          |                        |            |            |  |
|---------|-----------------------------------------------------|---------|--------|-------|------------------------|----------------------|----------------------------------------------------------------------------------------------------------------------------------------------------------------------------|----------|------------------------|------------|------------|--|
|         | PGN                                                 | q-value | PgSgFn | Pg    | log <sub>2</sub> Ratio | log <sub>2</sub> Sum | Regulation                                                                                                                                                                 | q-value  | log <sub>2</sub> Ratio | PgSgFn     | Pg         |  |
| PG2201  | 0.035356                                            | 23.46   | 12     | 0.97  | 5.15                   | Y                    |   Y     | 0.030329 | 1.28                   | 12611192.5 | 4739298.63 |  |
| PGN2068 | <i>def polypeptide deformylase</i>                  |         |        |       |                        |                      |                                                                                                                                                                            |          |                        |            |            |  |
| PG2204  | 0.420278                                            | 188.72  | 215.5  | -0.19 | 8.66                   | Y                    |   Y     | 0.075986 | -0.12                  | 115552638  | 125323369  |  |
| PGN2070 | <i>hypothetical protein PG_2204</i>                 |         |        |       |                        |                      |                                                                                                                                                                            |          |                        |            |            |  |
| PG2205  | 0.751373                                            | 31.99   | 36.5   | -0.19 | 6.1                    | Y                    |   G     | 0.001367 | -0.72                  | 15202092   | 25053538.4 |  |
| PGN2071 | <i>panE 2-dehydropantoate 2-reductase</i>           |         |        |       |                        |                      |                                                                                                                                                                            |          |                        |            |            |  |
| PG2206  | 0.011536                                            | 44.78   | 68     | -0.6  | 6.82                   | Y                    |   Y     | 0.022204 | -0.55                  | 29517930   | 42508754.2 |  |
| PGN2072 | <i>ABC transporter ATP-binding protein</i>          |         |        |       |                        |                      |                                                                                                                                                                            |          |                        |            |            |  |
| PG2207  | 0.203332                                            | 95.96   | 123.5  | -0.36 | 7.78                   | Y                    |   G     | 0.009241 | -0.36                  | 84556584   | 108314532  |  |
| PGN2073 | <i>conserved domain protein</i>                     |         |        |       |                        |                      |                                                                                                                                                                            |          |                        |            |            |  |
| PG2210  | 0.130489                                            | 6.4     | 15.5   | -1.28 | 4.45                   | Y                    |   Y     | 0.172311 | -2.66                  | 4050837.5  | 4489217.18 |  |
| PGN2075 | <i>uvrA-2 excinuclease ABC A subunit</i>            |         |        |       |                        |                      |                                                                                                                                                                            |          |                        |            |            |  |
| PG2213  | 0.423387                                            | 2.13    | 9.5    | -2.16 | 3.54                   | Y                    |   G     | 0.001053 | -4.78                  | 66413      | 1819694.78 |  |
| PGN2077 | <i>nitrite reductase-related protein</i>            |         |        |       |                        |                      |                                                                                                                                                                            |          |                        |            |            |  |
| PG2215  | 0.397614                                            | 90.63   | 96     | -0.08 | 7.54                   | Y                    |   Y     | 0.027084 | 0.26                   | 71157682.5 | 59843078   |  |
| PGN2079 | <i>manC mannose-1-phosphate guanylyltransferase</i> |         |        |       |                        |                      |                                                                                                                                                                            |          |                        |            |            |  |
| PG2216  | 0.692989                                            | 57.57   | 49.5   | 0.22  | 6.74                   | Y                    |   Y     | 0.051355 | -0.76                  | 31536331.5 | 51281969.1 |  |
| PGN2080 | <i>hypothetical protein PG_2216</i>                 |         |        |       |                        |                      |                                                                                                                                                                            |          |                        |            |            |  |
| PG2217  | 0.003541                                            | 19.19   | 41.5   | -1.11 | 5.92                   | G                    |   G     | 0.001647 | -1.32                  | 8728342    | 21772864.6 |  |
| PGN2081 | <i>dxs deoxyxylulose-5-phosphate synthase</i>       |         |        |       |                        |                      |                                                                                                                                                                            |          |                        |            |            |  |
| PG2218  | 0.779998                                            | 24.52   | 28.5   | -0.22 | 5.73                   | Y                    |   G     | 0.004902 | -0.84                  | 8473792.5  | 15218141.9 |  |
| PGN2082 | <i>trkA potassium uptake protein TrkA</i>           |         |        |       |                        |                      |                                                                                                                                                                            |          |                        |            |            |  |
| PG2221  | 0.147331                                            | 9.6     | 9.5    | 0.02  | 4.26                   | Y                    |   Y     | 0.191557 | -2.34                  | 3028169.5  | 2986522.98 |  |
| PGN2085 | <i>MiaB-like tRNA modifying enzyme</i>              |         |        |       |                        |                      |                                                                                                                                                                            |          |                        |            |            |  |
| PG2222  | 0.400806                                            | 2.13    | 5      | -1.23 | 2.83                   | Y                    |   Y | 0.052108 | -2.26                  | 66413      | 1898850    |  |
| PGN2086 | <i>acyltransferase HtrB/MsbB family</i>             |         |        |       |                        |                      |                                                                                                                                                                            |          |                        |            |            |  |
| PG2227  | 0.720026                                            | 2.13    | 7.5    | -1.82 | 3.27                   | Y                    |   G | 0.000176 | -6.40                  | 66413      | 5557448.95 |  |
| PGN2091 | <i>hypothetical protein PG_2227</i>                 |         |        |       |                        |                      |                                                                                                                                                                            |          |                        |            |            |  |
| PG0183  | 0.786190                                            | 24.52   | 26.5   | -0.11 | 5.67                   | Y                    |   G | 0.000238 | -0.99                  | 11799765   | 23427742.2 |  |
|         | <i>lipoprotein putative</i>                         |         |        |       |                        |                      |                                                                                                                                                                            |          |                        |            |            |  |
| PG0184  | 0.021100                                            | 111.95  | 77     | 0.54  | 7.56                   | Y                    |   Y | 0.135130 | -0.11                  | 52890190.5 | 56312697.8 |  |
|         | <i>ISPg1 transposase</i>                            |         |        |       |                        |                      |                                                                                                                                                                            |          |                        |            |            |  |
| PG0460  | 0.000000                                            | 2.13    | 32     | -3.91 | 5.09                   | Y                    |   G | 0.001876 | -7.89                  | 66413      | 15815432.5 |  |
|         | <i>ISPg1 transposase</i>                            |         |        |       |                        |                      |                                                                                                                                                                            |          |                        |            |            |  |
| PG0718  | 0.784897                                            | 2.13    | 5.5    | -1.37 | 2.93                   | Y                    |   Y | 0.010832 | -7.12                  | 66413      | 9991080.5  |  |
|         | <i>conserved hypothetical protein</i>               |         |        |       |                        |                      |                                                                                                                                                                            |          |                        |            |            |  |
| PG0770  | 0.600049                                            | 2.13    | 4      | -0.91 | 2.62                   | Y                    |   Y | 0.052108 | -2.56                  | 66413      | 3787101.5  |  |
|         | <i>hypothetical protein PG_0770</i>                 |         |        |       |                        |                      |                                                                                                                                                                            |          |                        |            |            |  |
| PG0810  | 0.600049                                            | 2.13    | 4      | -0.91 | 2.62                   | Y                    |   Y | 0.052108 | -2.06                  | 66413      | 1877864.5  |  |
|         | <i>hypothetical protein PG_0810</i>                 |         |        |       |                        |                      |                                                                                                                                                                            |          |                        |            |            |  |
| PG0826  | 0.725943                                            | 2.13    | 7      | -1.72 | 3.19                   | Y                    |   G | 0.000828 | -6.58                  | 66413      | 6312089.78 |  |
|         | <i>transcriptional regulator AraC family</i>        |         |        |       |                        |                      |                                                                                                                                                                            |          |                        |            |            |  |
| PG0833  | 0.685422                                            | 2.13    | 3.5    | -0.72 | 2.49                   | Y                    |   Y | 0.053020 | -1.30                  | 66413      | 663248     |  |
|         | <i>conserved hypothetical protein</i>               |         |        |       |                        |                      |                                                                                                                                                                            |          |                        |            |            |  |
| PG0851  | 0.600049                                            | 2.13    | 4      | -0.91 | 2.62                   | Y                    |   Y | 0.052108 | -2.56                  | 66413      | 3782649.5  |  |
|         | <i>conserved hypothetical protein</i>               |         |        |       |                        |                      |                                                                                                                                                                            |          |                        |            |            |  |
| PG0854  | 0.604563                                            | 2.13    | 4      | -0.91 | 2.62                   | Y                    |   Y | 0.052108 | -1.90                  | 66413      | 1166788.05 |  |
|         | <i>hypothetical protein PG_0854</i>                 |         |        |       |                        |                      |                                                                                                                                                                            |          |                        |            |            |  |

| TIGR                                | PgSgFn / Pg Spectral Count |         |        |       |                        |                      |                                                                                                                                                                      | PgSgFn / Pg Protein Intensity |                        |        |           |            |
|-------------------------------------|----------------------------|---------|--------|-------|------------------------|----------------------|----------------------------------------------------------------------------------------------------------------------------------------------------------------------|-------------------------------|------------------------|--------|-----------|------------|
|                                     | PGN                        | q-value | PgSgFn | Pg    | log <sub>2</sub> Ratio | log <sub>2</sub> Sum | Regulation                                                                                                                                                           | q-value                       | log <sub>2</sub> Ratio | PgSgFn | Pg        |            |
| PG1025                              | 0.543202                   | 2.13    | 9      | -2.08 | 3.48                   | Y                    |   | G                             | 0.000995               | -4.71  | 66413     | 1731751.78 |
| <i>conserved domain protein</i>     |                            |         |        |       |                        |                      |                                                                                                                                                                      |                               |                        |        |           |            |
| PG1530                              | 0.604563                   | 2.13    | 4      | -0.91 | 2.62                   | Y                    |   | Y                             | 0.056249               | -1.01  | 66413     | 349166     |
| <i>conserved domain protein</i>     |                            |         |        |       |                        |                      |                                                                                                                                                                      |                               |                        |        |           |            |
| PG1630                              | 0.000000                   | 437.14  | 391    | 0.16  | 9.69                   | R                    |   | Y                             | 0.050907               | 1.46   | 232235660 | 57156757.1 |
| <i>hypothetical protein PG_1630</i> |                            |         |        |       |                        |                      |                                                                                                                                                                      |                               |                        |        |           |            |
| PG1863                              | 0.240620                   | 2.13    | 11     | -2.37 | 3.71                   | Y                    |   | G                             | 0.001728               | -5.70  | 66413     | 3442877.63 |
| <i>hypothetical protein PG_1863</i> |                            |         |        |       |                        |                      |                                                                                                                                                                      |                               |                        |        |           |            |

| TIGR<br>PGN      | Sec Pg in<br>Pg PgSgFn                                      | Sec Pg in Pg |                | Sec Pg in PgSgFn |                |
|------------------|-------------------------------------------------------------|--------------|----------------|------------------|----------------|
|                  |                                                             | Mean Sc      | Mean Intensity | Mean Sc          | Mean Intensity |
| PG0026           |                                                             | 7            | 1258696        |                  |                |
| PGN0022          | <i>hypothetical protein PG_0026</i>                         |              |                |                  |                |
| PG0027           |                                                             | 19           | 4895226        | 5                | 1784808        |
| PGN0023          | <i>hypothetical protein PG_0027</i>                         |              |                |                  |                |
| PG0034           |                                                             |              |                | 4                | 1024073        |
| PGN0033          | <i>trx thioredoxin</i>                                      |              |                |                  |                |
| PG0042           |                                                             | 4            | 800313         |                  |                |
| PGN0038          | <i>glyA serine hydroxymethyltransferase</i>                 |              |                |                  |                |
| PG2173           |                                                             | 4            | 914606         | 4                | 735199         |
| PGN0122          | <i>omp28 outer membrane lipoprotein Omp28</i>               |              |                |                  |                |
| PG2167           |                                                             | 25           | 9615711        | 5                | 915560         |
| PGN0128          | <i>immunoreactive 53 kDa antigen PG123</i>                  |              |                |                  |                |
| PG2168           |                                                             | 9            | 2963937        |                  |                |
| PGN0129          | <i>hypothetical protein PG_2168</i>                         |              |                |                  |                |
| PG2094           |                                                             |              |                | 3                | 327127         |
| PGN0145          | <i>conserved domain protein</i>                             |              |                |                  |                |
| PG2124           |                                                             | 15           | 2972887        | 6                | 2038238        |
| PGN0173          | <i>gapA glyceraldehyde 3-phosphate dehydrogenase type I</i> |              |                |                  |                |
| P13793IFMA_PORGI |                                                             | 233          | 128837846      | 130              | 73554754       |
| PGN0180          | <i>major fimbriin A, Porphyromonas gingivalis 33277</i>     |              |                |                  |                |
| PG2134           |                                                             | 3            | 1048602        |                  |                |
| PGN0183          | <i>lipoprotein putative</i>                                 |              |                |                  |                |
| PG2157           |                                                             | 4            | 974772         | 3                | 778146         |
| PGN0202          | <i>glutamine cyclotransferase-related protein</i>           |              |                |                  |                |
| PG0121           |                                                             | 5            | 1016575        |                  |                |
| PGN0235          | <i>hup-1 DNA-binding protein HU</i>                         |              |                |                  |                |
| PG0159           |                                                             | 5            | 933854         |                  |                |
| PGN0271          | <i>pepO endopeptidase PepO</i>                              |              |                |                  |                |
| PG0179           |                                                             |              |                |                  |                |
| PGN0288          | <i>hypothetical protein PG_0179</i>                         |              |                |                  |                |
| PG0180           |                                                             | 4            | 1285096        |                  |                |
| PGN0289          | <i>lipoprotein putative</i>                                 |              |                |                  |                |
| PG0181           |                                                             | 8            | 1489527        | 4                | 1064556        |
| PGN0290          | <i>immunoreactive 32 kDa antigen PG49</i>                   |              |                |                  |                |
| PG0182           |                                                             | 5            | 1075448        |                  |                |
| PGN0291          | <i>von Willebrand factor type A domain protein</i>          |              |                |                  |                |
| PG0185           |                                                             | 30           | 9080269        | 18               | 3023025        |
| PGN0293          | <i>ragA ragA protein</i>                                    |              |                |                  |                |
| PG0192           |                                                             |              |                |                  |                |
| PGN0300          | <i>ompH-1 cationic outer membrane protein OmpH</i>          |              |                |                  |                |
| PG0193           |                                                             | 5            | 402857         |                  |                |
| PGN0301          | <i>ompH-2 cationic outer membrane protein OmpH</i>          |              |                |                  |                |
| PG0196           |                                                             | 16           | 3854188        | 3                | 729732         |
| PGN0303          | <i>peptidase M16 family</i>                                 |              |                |                  |                |
| PG0217           |                                                             | 5            | 838286         |                  |                |
| PGN0322          | <i>hypothetical protein PG_0217</i>                         |              |                |                  |                |
| PG0232           |                                                             | 18           | 3528401        | 6                | 1813666        |
| PGN0335          | <i>zinc carboxypeptidase putative</i>                       |              |                |                  |                |

| TIGR<br>PGN | Sec Pg in<br>Pg PgSgFn                                    | Sec Pg in Pg |                | Sec Pg in PgSgFn |                |
|-------------|-----------------------------------------------------------|--------------|----------------|------------------|----------------|
|             |                                                           | Mean Sc      | Mean Intensity | Mean Sc          | Mean Intensity |
| PG1729      |                                                           | 6            | 814128         |                  |                |
| PGN0388     | <i>thiol peroxidase</i>                                   |              |                |                  |                |
| PG1726      |                                                           | 10           | 2267288        |                  |                |
| PGN0391     | <i>PDZ domain protein</i>                                 |              |                |                  |                |
| PG1676      |                                                           | 11           | 2219213        | 15               | 3544761        |
| PGN0434     | <i>pckA phosphoenolpyruvate carboxykinase (ATP)</i>       |              |                |                  |                |
| PG1626      |                                                           | 5            | 388616         |                  |                |
| PGN0477     | <i>hypothetical protein PG_1626</i>                       |              |                |                  |                |
| PG1604      |                                                           | 3            | 632877         |                  |                |
| PGN0509     | <i>immunoreactive 84 kDa antigen PG93</i>                 |              |                |                  |                |
| PG1553      |                                                           | 8            | 955553         |                  |                |
| PGN0556     | <i>CobN/magnesium chelatase family protein</i>            |              |                |                  |                |
| PG1552      |                                                           | 10           | 1294932        |                  |                |
| PGN0557     | <i>hmuR TonB-dependent receptor HmuR</i>                  |              |                |                  |                |
| PG1551      |                                                           | 28           | 14238772       | 19               | 6737550        |
| PGN0558     | <i>hmuY hmuY protein</i>                                  |              |                |                  |                |
| PG1545      |                                                           | 8            | 3715108        |                  |                |
| PGN0564     | <i>sodB superoxide dismutase Fe-Mn</i>                    |              |                |                  |                |
| PG1286      |                                                           | 12           | 8110101        | 4                | 969569         |
| PGN0604     | <i>ftn ferritin</i>                                       |              |                |                  |                |
| PG1278      |                                                           | 19           | 5504974        | 47               | 13725683       |
| PGN0612     | <i>serC phosphoserine aminotransferase</i>                |              |                |                  |                |
| PG0602      |                                                           | 3            | 775403         |                  |                |
| PGN0645     | <i>hypothetical protein PG_0602</i>                       |              |                |                  |                |
| PG0611      |                                                           |              |                | 4                | 722396         |
| PGN0654     | <i>lipoprotein putative</i>                               |              |                |                  |                |
| PG0613      |                                                           | 6            | 1484985        |                  |                |
| PGN0656     | <i>hypothetical protein PG_0613</i>                       |              |                |                  |                |
| PG0614      |                                                           | 12           | 2146675        |                  |                |
| PGN0657     | <i>hypothetical protein PG_0614</i>                       |              |                |                  |                |
| PG0616      |                                                           | 35           | 10246182       | 22               | 5568320        |
| PGN0659     | <i>thioredoxin putative</i>                               |              |                |                  |                |
| PG0623      |                                                           | 5            | 985726         | 13               | 3498261        |
| PGN0665     | <i>tpiA triosephosphate isomerase</i>                     |              |                |                  |                |
| PG0654      |                                                           | 8            | 2426924        | 4                | 1267833        |
| PGN0693     | <i>hypothetical protein PG_0654</i>                       |              |                |                  |                |
| PG0668      |                                                           | 4            | 657170         |                  |                |
| PGN0704     | <i>TonB-dependent receptor</i>                            |              |                |                  |                |
| PG0669      |                                                           | 10           | 3469796        | 11               | 3118385        |
| PGN0705     | <i>fetB heme-binding protein FetB</i>                     |              |                |                  |                |
| PG0687      |                                                           | 21           | 3715701        | 32               | 9053154        |
| PGN0723     | <i>sucD succinate-semialdehyde dehydrogenase</i>          |              |                |                  |                |
| PG0689      |                                                           | 6            | 1260288        |                  |                |
| PGN0724     | <i>4hbD NAD-dependent 4-hydroxybutyrate dehydrogenase</i> |              |                |                  |                |
| PG0690      |                                                           | 4            | 552813         |                  |                |
| PGN0725     | <i>abfT-1 4-hydroxybutyrate CoA-transferase</i>           |              |                |                  |                |
| PG0692      |                                                           | 15           | 3789281        |                  |                |
| PGN0727     | <i>abfD 4-hydroxybutyryl-CoA dehydratase</i>              |              |                |                  |                |

| TIGR<br>PGN | Sec Pg in<br>Pg PgSgFn | Sec Pg in Pg                                                                           |                | Sec Pg in PgSgFn |                |
|-------------|------------------------|----------------------------------------------------------------------------------------|----------------|------------------|----------------|
|             |                        | Mean Sc                                                                                | Mean Intensity | Mean Sc          | Mean Intensity |
| PG0694      |                        | 17                                                                                     | 4407306        | 5                | 1273947        |
| PGN0728     |                        | <i>immunoreactive 42 kDa antigen PG33</i>                                              |                |                  |                |
| PG0695      |                        | 15                                                                                     | 4312280        | 8                | 1930239        |
| PGN0729     |                        | <i>immunoreactive 43 kDa antigen PG32</i>                                              |                |                  |                |
| PG0707      |                        | 8                                                                                      | 1058462        |                  |                |
| PGN0741     |                        | <i>TonB-dependent receptor putative</i>                                                |                |                  |                |
| PG0724      |                        | 4                                                                                      | 859389         | 10               | 1935290        |
| PGN0756     |                        | <i>prolyl oligopeptidase family protein</i>                                            |                |                  |                |
| PG0766      |                        | 4                                                                                      | 612088         |                  |                |
| PGN0792     |                        | <i>pnpA polyribonucleotide nucleotidyltransferase</i>                                  |                |                  |                |
| PG0769      |                        | 7                                                                                      | 2514191        | 6                | 1984767        |
| PGN0795     |                        | <i>fibronectin type III domain protein</i>                                             |                |                  |                |
| PG0782      |                        | 8                                                                                      | 2135357        | 4                | 931078         |
| PGN0806     |                        | <i>MotA/TolQ/ExbB proton channel family protein</i>                                    |                |                  |                |
| PG0802      |                        | 4                                                                                      | 557449         | 4                | 682986         |
| PGN0826     |                        | <i>pdhD alpha keto acid dehydrogenase complex E3 component lipoamide dehydrogenase</i> |                |                  |                |
| PG1374      |                        | 12                                                                                     | 2777827        | 5                | 869264         |
| PGN0852     |                        | <i>immunoreactive 47 kDa antigen PG97</i>                                              |                |                  |                |
| PG1385      |                        | 9                                                                                      | 2960748        | 3                | 606775         |
| PGN0876     |                        | <i>TPR domain protein</i>                                                              |                |                  |                |
| PG1401      |                        | 5                                                                                      | 800063         |                  |                |
| PGN0880     |                        | <i>beta-eliminating lyase</i>                                                          |                |                  |                |
| PG1421      |                        | 5                                                                                      | 1205541        |                  |                |
| PGN0895     |                        | <i>ferredoxin 4Fe-4S</i>                                                               |                |                  |                |
| PG1424      |                        | 41                                                                                     | 23669897       | 22               | 8435568        |
| PGN0898     |                        | <i>peptidylarginine deiminase</i>                                                      |                |                  |                |
| PG1427      |                        | 6                                                                                      | 3575179        | 4                | 2254971        |
| PGN0900     |                        | <i>thiol protease/hemagglutinin PrtT precursor putative</i>                            |                |                  |                |
| PG1210      |                        | 13                                                                                     | 2506937        | 10               | 2184907        |
| PGN0914     |                        | <i>peptidase M24 family</i>                                                            |                |                  |                |
| PG0950      |                        |                                                                                        |                |                  |                |
| PGN1000     |                        | <i>gcvH glycine cleavage system H protein</i>                                          |                |                  |                |
| PG0933      |                        | 4                                                                                      | 663176         |                  |                |
| PGN1014     |                        | <i>translation elongation factor G putative</i>                                        |                |                  |                |
| PG0903      |                        |                                                                                        |                |                  |                |
| PGN1038     |                        | <i>conserved hypothetical protein</i>                                                  |                |                  |                |
| PG0890      |                        |                                                                                        |                | 4                | 968954         |
| PGN1049     |                        | <i>alkaline phosphatase putative</i>                                                   |                |                  |                |
| PG1290      |                        | 9                                                                                      | 3654196        | 8                | 2929915        |
| PGN1080     |                        | <i>ilvE branched-chain amino acid aminotransferase</i>                                 |                |                  |                |
| PG1297      |                        | 3                                                                                      | 596100         |                  |                |
| PGN1088     |                        | <i>rpsA ribosomal protein S1</i>                                                       |                |                  |                |
| PG1302      |                        | 3                                                                                      | 643743         |                  |                |
| PGN1091     |                        | <i>hypothetical protein PG_1302</i>                                                    |                |                  |                |
| PG1305      |                        |                                                                                        |                | 10               | 2135945        |
| PGN1094     |                        | <i>gcvP glycine cleavage system P protein</i>                                          |                |                  |                |
| PG1313      |                        | 5                                                                                      | 856860         |                  |                |
| PGN1103     |                        | <i>dipeptidase-related protein</i>                                                     |                |                  |                |



| TIGR<br>PGN | Sec Pg in<br>Pg PgSgFn                                                  | Sec Pg in Pg |                | Sec Pg in PgSgFn |                |
|-------------|-------------------------------------------------------------------------|--------------|----------------|------------------|----------------|
|             |                                                                         | Mean Sc      | Mean Intensity | Mean Sc          | Mean Intensity |
| PG1327      |                                                                         | 5            | 922699         | 4                | 1177884        |
| PGN1116     | <i>aminotransferase putative</i>                                        |              |                |                  |                |
| PG1341      |                                                                         | 6            | 4098009        | 3                | 1176068        |
| PGN1129     | <i>hypothetical protein PG_1341</i>                                     |              |                |                  |                |
| PG1084      |                                                                         | 8            | 1221973        | 4                | 645667         |
| PGN1181     | <i>thioredoxin family protein</i>                                       |              |                |                  |                |
| PG1134      |                                                                         |              |                |                  |                |
| PGN1232     | <i>trxB thioredoxin reductase</i>                                       |              |                |                  |                |
| PG2188      |                                                                         |              |                | 3                | 718495         |
| PGN1272     | <i>lysA diaminopimelate decarboxylase</i>                               |              |                |                  |                |
| PG1030      |                                                                         | 3            | 364700         |                  |                |
| PGN1321     | <i>hypothetical protein PG_1030</i>                                     |              |                |                  |                |
| PG1028      |                                                                         | 10           | 2892304        |                  |                |
| PGN1323     | <i>TPR domain protein</i>                                               |              |                |                  |                |
| PG1017      |                                                                         | 8            | 1033515        |                  |                |
| PGN1338     | <i>ppdK pyruvate phosphate dikinase</i>                                 |              |                |                  |                |
| PG1004      |                                                                         | 13           | 2876468        | 10               | 2321517        |
| PGN1349     | <i>prolyl oligopeptidase family protein</i>                             |              |                |                  |                |
| PG1232      |                                                                         | 37           | 17334014       | 175              | 104912972      |
| PGN1367     | <i>gdh glutamate dehydrogenase NAD-specific</i>                         |              |                |                  |                |
| PG1235      |                                                                         | 4            | 682611         |                  |                |
| PGN1370     | <i>epimerase/reductase putative</i>                                     |              |                |                  |                |
| PG1269      |                                                                         | 4            | 443754         |                  |                |
| PGN1401     | <i>pruA delta-1-pyrroline-5-carboxylate dehydrogenase</i>               |              |                |                  |                |
| PG0558      |                                                                         | 9            | 1992694        | 8                | 2362422        |
| PGN1412     | <i>purine nucleoside phosphorylase I inosine and guanosine-specific</i> |              |                |                  |                |
| PG0553      |                                                                         | 16           | 4635986        | 7                | 2261568        |
| PGN1416     | <i>extracellular protease putative</i>                                  |              |                |                  |                |
| PG0537      |                                                                         | 15           | 3395522        | 7                | 1660704        |
| PGN1434     | <i>pepD-2 aminoacyl-histidine dipeptidase</i>                           |              |                |                  |                |
| PG0506      |                                                                         | 104          | 88812154       | 49               | 71045513       |
| PGN1466     | <i>prrIII arginine-specific cysteine proteinase</i>                     |              |                |                  |                |
| PG0495      |                                                                         | 48           | 23735721       | 36               | 19838653       |
| PGN1476     | <i>hypothetical protein PG_0495</i>                                     |              |                |                  |                |
| PG0491      |                                                                         | 11           | 2590147        |                  |                |
| PGN1479     | <i>conserved hypothetical protein</i>                                   |              |                |                  |                |
| PG0449      |                                                                         | 5            | 907467         |                  |                |
| PGN1513     | <i>TPR domain protein</i>                                               |              |                |                  |                |
| PG0429      |                                                                         | 5            | 529390         |                  |                |
| PGN1530     | <i>pyruvate synthase</i>                                                |              |                |                  |                |
| PG0411      |                                                                         | 12           | 3109808        | 10               | 3165978        |
| PGN1556     | <i>hemagglutinin putative</i>                                           |              |                |                  |                |
| PG0393      |                                                                         | 9            | 4817575        | 9                | 3244571        |
| PGN1572     | <i>rplL ribosomal protein L7/L12</i>                                    |              |                |                  |                |
| PG0390      |                                                                         | 3            | 674660         |                  |                |
| PGN1575     | <i>rplK ribosomal protein L11</i>                                       |              |                |                  |                |
| PG0387      |                                                                         | 14           | 4952070        |                  |                |
| PGN1578     | <i>tuf translation elongation factor Tu</i>                             |              |                |                  |                |

| TIGR<br>PGN | Sec Pg in<br>Pg PgSgFn                                                                          | Sec Pg in Pg |                | Sec Pg in PgSgFn |                |
|-------------|-------------------------------------------------------------------------------------------------|--------------|----------------|------------------|----------------|
|             |                                                                                                 | Mean Sc      | Mean Intensity | Mean Sc          | Mean Intensity |
| PG0350      |                                                                                                 | 19           | 5946754        | 11               | 3366335        |
| PGN1611     | <i>internalin-related protein</i>                                                               |              |                |                  |                |
| PG0343      |                                                                                                 | 3            | 542694         | 4                | 985838         |
| PGN1618     | <i>megL methionine gamma-lyase</i>                                                              |              |                |                  |                |
| PG1755      |                                                                                                 | 14           | 2246413        | 11               | 2417149        |
| PGN1695     | <i>fbaB fructose-bisphosphate aldolase class I</i>                                              |              |                |                  |                |
| PG1762      |                                                                                                 | 11           | 1731191        |                  |                |
| PGN1702     | <i>secDF protein-export membrane protein SecD/protein-export membrane protein SecF</i>          |              |                |                  |                |
| PG1764      |                                                                                                 | 6            | 1057309        |                  |                |
| PGN1704     | <i>fabF 3-oxoacyl-(acyl-carrier-protein) synthase II</i>                                        |              |                |                  |                |
| PG1837      |                                                                                                 | 53           | 56911019       | 34               | 44174273       |
| PGN1733     | <i>hemagglutinin protein HagA</i>                                                               |              |                |                  |                |
| PG1835      |                                                                                                 | 3            | 292394         |                  |                |
| PGN1735     | <i>lipoprotein putative</i>                                                                     |              |                |                  |                |
| PG1824      |                                                                                                 | 3            | 355781         |                  |                |
| PGN1743     | <i>eno enolase</i>                                                                              |              |                |                  |                |
| PG1823      |                                                                                                 |              |                |                  |                |
| PGN1744     | <i>hypothetical protein PG_1823</i>                                                             |              |                |                  |                |
| PG1816      |                                                                                                 |              |                | 4                | 674206         |
| PGN1749     | <i>NAD(P)H dehydrogenase quinone family putative</i>                                            |              |                |                  |                |
| PG1812      |                                                                                                 | 6            | 941448         |                  |                |
| PGN1753     | <i>2-oxoglutarate oxidoreductase alpha subunit</i>                                              |              |                |                  |                |
| PG1798      |                                                                                                 | 5            | 964806         |                  |                |
| PGN1767     | <i>immunoreactive 46 kDa antigen PG99</i>                                                       |              |                |                  |                |
| PG1788      |                                                                                                 | 14           | 4114038        |                  |                |
| PGN1777     | <i>cysteine peptidase putative</i>                                                              |              |                |                  |                |
| PG1847      |                                                                                                 |              |                |                  |                |
| PGN1780     | <i>endoribonuclease L-PSP putative</i>                                                          |              |                |                  |                |
| PG1858      |                                                                                                 | 35           | 10096785       | 13               | 4589300        |
| PGN1791     | <i>flavodoxin</i>                                                                               |              |                |                  |                |
| PG1872      |                                                                                                 |              |                | 10               | 2384560        |
| PGN1800     | <i>hutU urocanate hydratase</i>                                                                 |              |                |                  |                |
| PG1881      |                                                                                                 | 13           | 1105780        | 7                | 1473415        |
| PGN1808     | <i>hypothetical protein PG_1881</i>                                                             |              |                |                  |                |
| PG1940      |                                                                                                 | 4            | 378205         |                  |                |
| PGN1870     | <i>fusA translation elongation factor G</i>                                                     |              |                |                  |                |
| PG1948      |                                                                                                 | 5            | 821945         |                  |                |
| PGN1878     | <i>lipoprotein putative</i>                                                                     |              |                |                  |                |
| PG1949      |                                                                                                 | 3            | 333410         |                  |                |
| PGN1880     | <i>mdh malate dehydrogenase</i>                                                                 |              |                |                  |                |
| PG1996      |                                                                                                 |              |                |                  |                |
| PGN1941     | <i>deoC deoxyribose-phosphate aldolase</i>                                                      |              |                |                  |                |
| PG0071      |                                                                                                 | 6            | 1088701        | 5                | 1346533        |
| PGN2019     | <i>UDP-3-O-acyl-GlcNAc deacetylase/beta-hydroxyacyl-[acyl carrier protein] dehydratase FabZ</i> |              |                |                  |                |
| PG0073      |                                                                                                 |              |                |                  |                |
| PGN2021     | <i>orotidine 5'-monophosphate decarboxylase</i>                                                 |              |                |                  |                |
| PG0090      |                                                                                                 | 5            | 1166140        | 4                | 1074940        |
| PGN2037     | <i>Dps family protein</i>                                                                       |              |                |                  |                |

| TIGR<br>PGN | Sec Pg in<br>Pg PgSgFn                                                                                                                                              | Sec Pg in Pg |                | Sec Pg in PgSgFn |                |
|-------------|---------------------------------------------------------------------------------------------------------------------------------------------------------------------|--------------|----------------|------------------|----------------|
|             |                                                                                                                                                                     | Mean Sc      | Mean Intensity | Mean Sc          | Mean Intensity |
| PG0094      |                                                                                    | 4            | 960984         |                  |                |
| PGN2041     | <i>outer membrane efflux protein putative</i>                                                                                                                       |              |                |                  |                |
| PG2024      |   | 82           | 24114809       | 39               | 12240819       |
| PGN2065     | <i>hagE hemagglutinin protein HagE</i>                                                                                                                              |              |                |                  |                |
| PG2216      |                                                                                    | 4            | 1260414        |                  |                |
| PGN2080     | <i>hypothetical protein PG_2216</i>                                                                                                                                 |              |                |                  |                |
| PG0770      |                                                                                    |              |                |                  |                |
|             | <i>hypothetical protein PG_0770</i>                                                                                                                                 |              |                |                  |                |
| PG1630      |                                                                                    | 6            | 526292         |                  |                |
|             | <i>hypothetical protein PG_1630</i>                                                                                                                                 |              |                |                  |                |

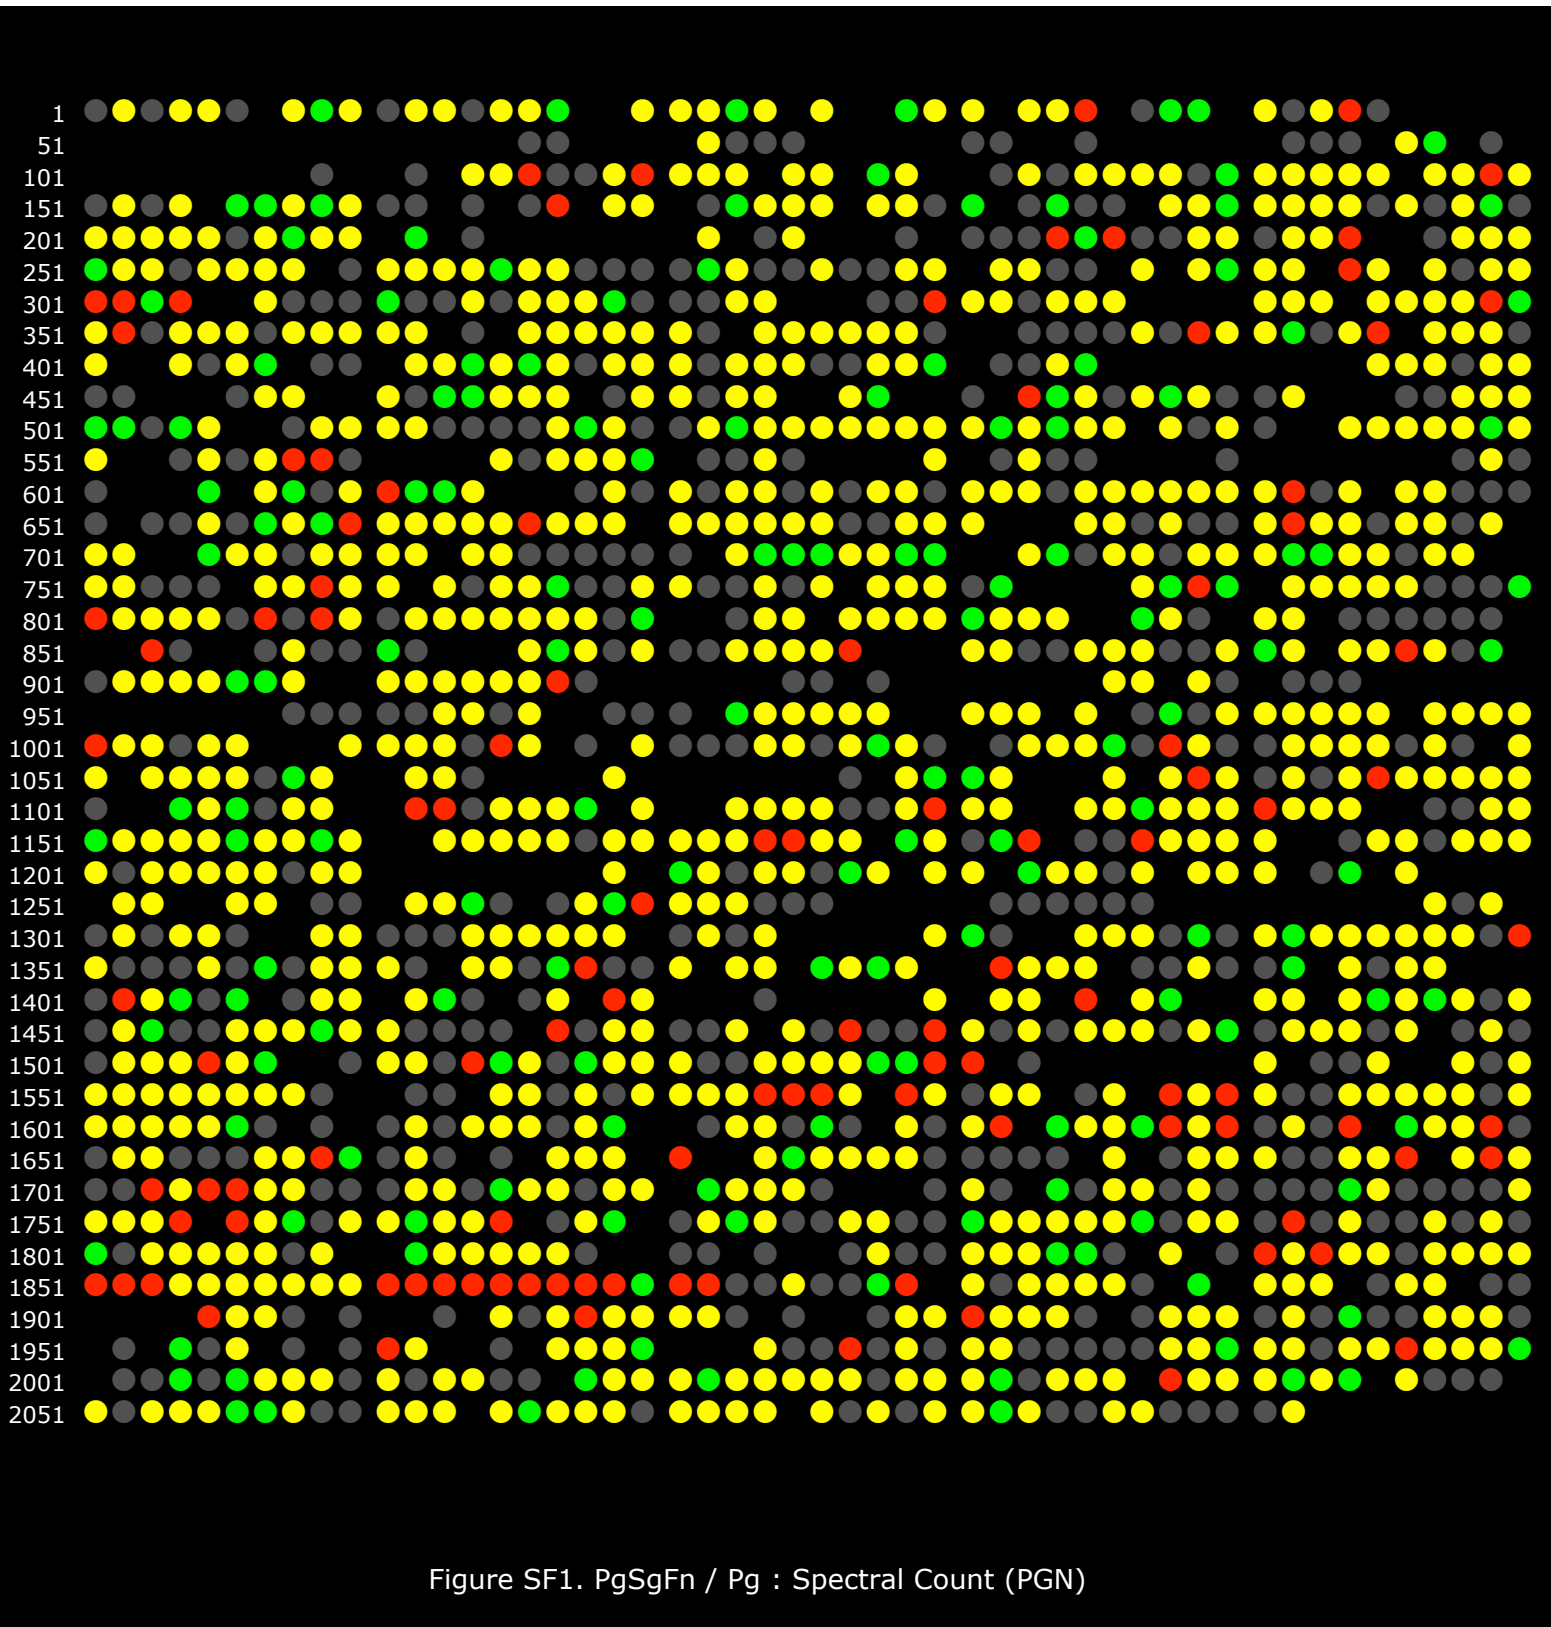

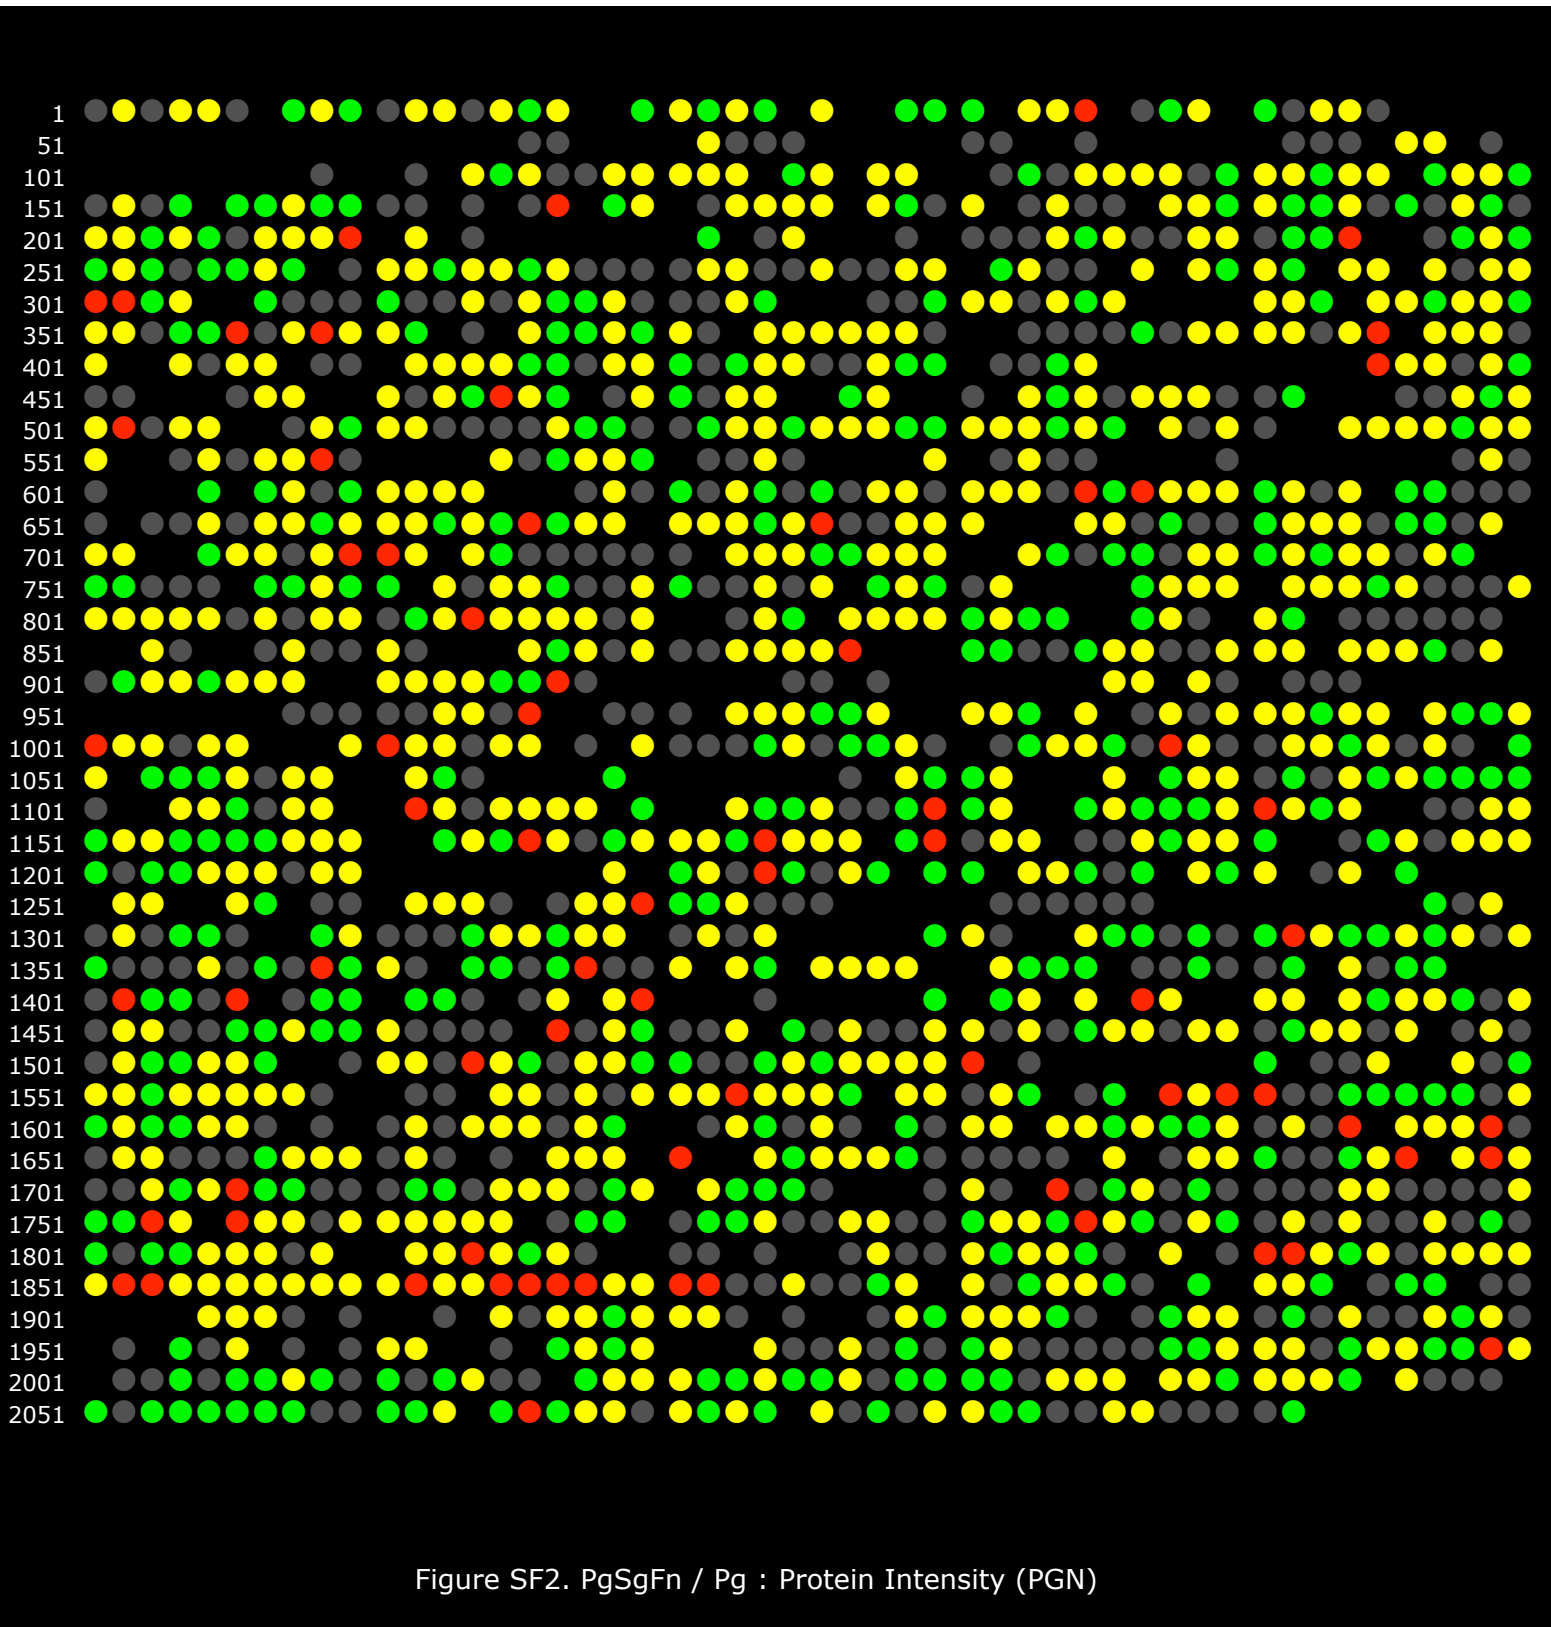

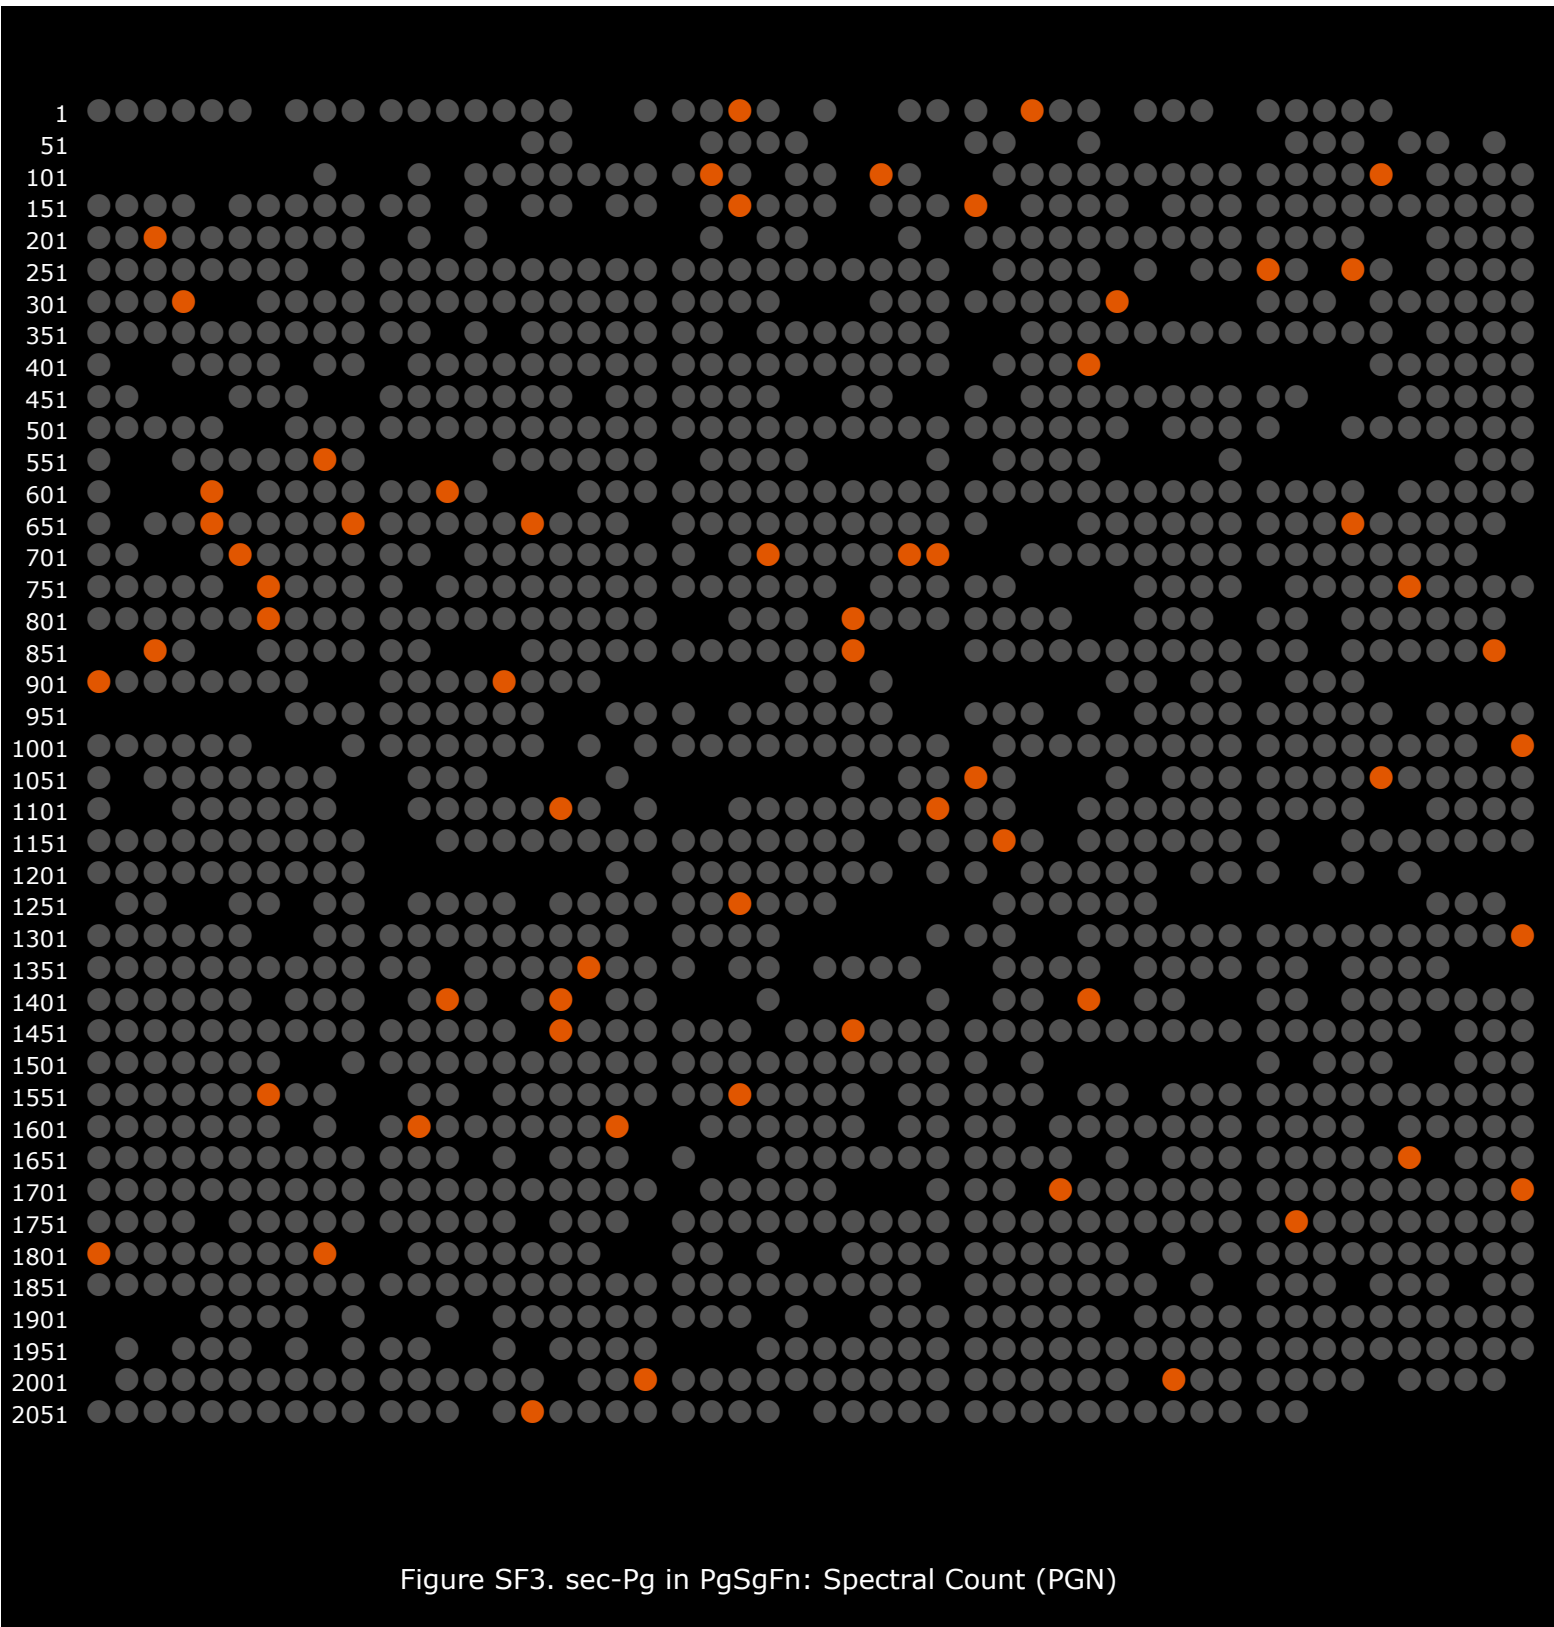

Figure SF3. sec-Pg in PgSgFn: Spectral Count (PGN)



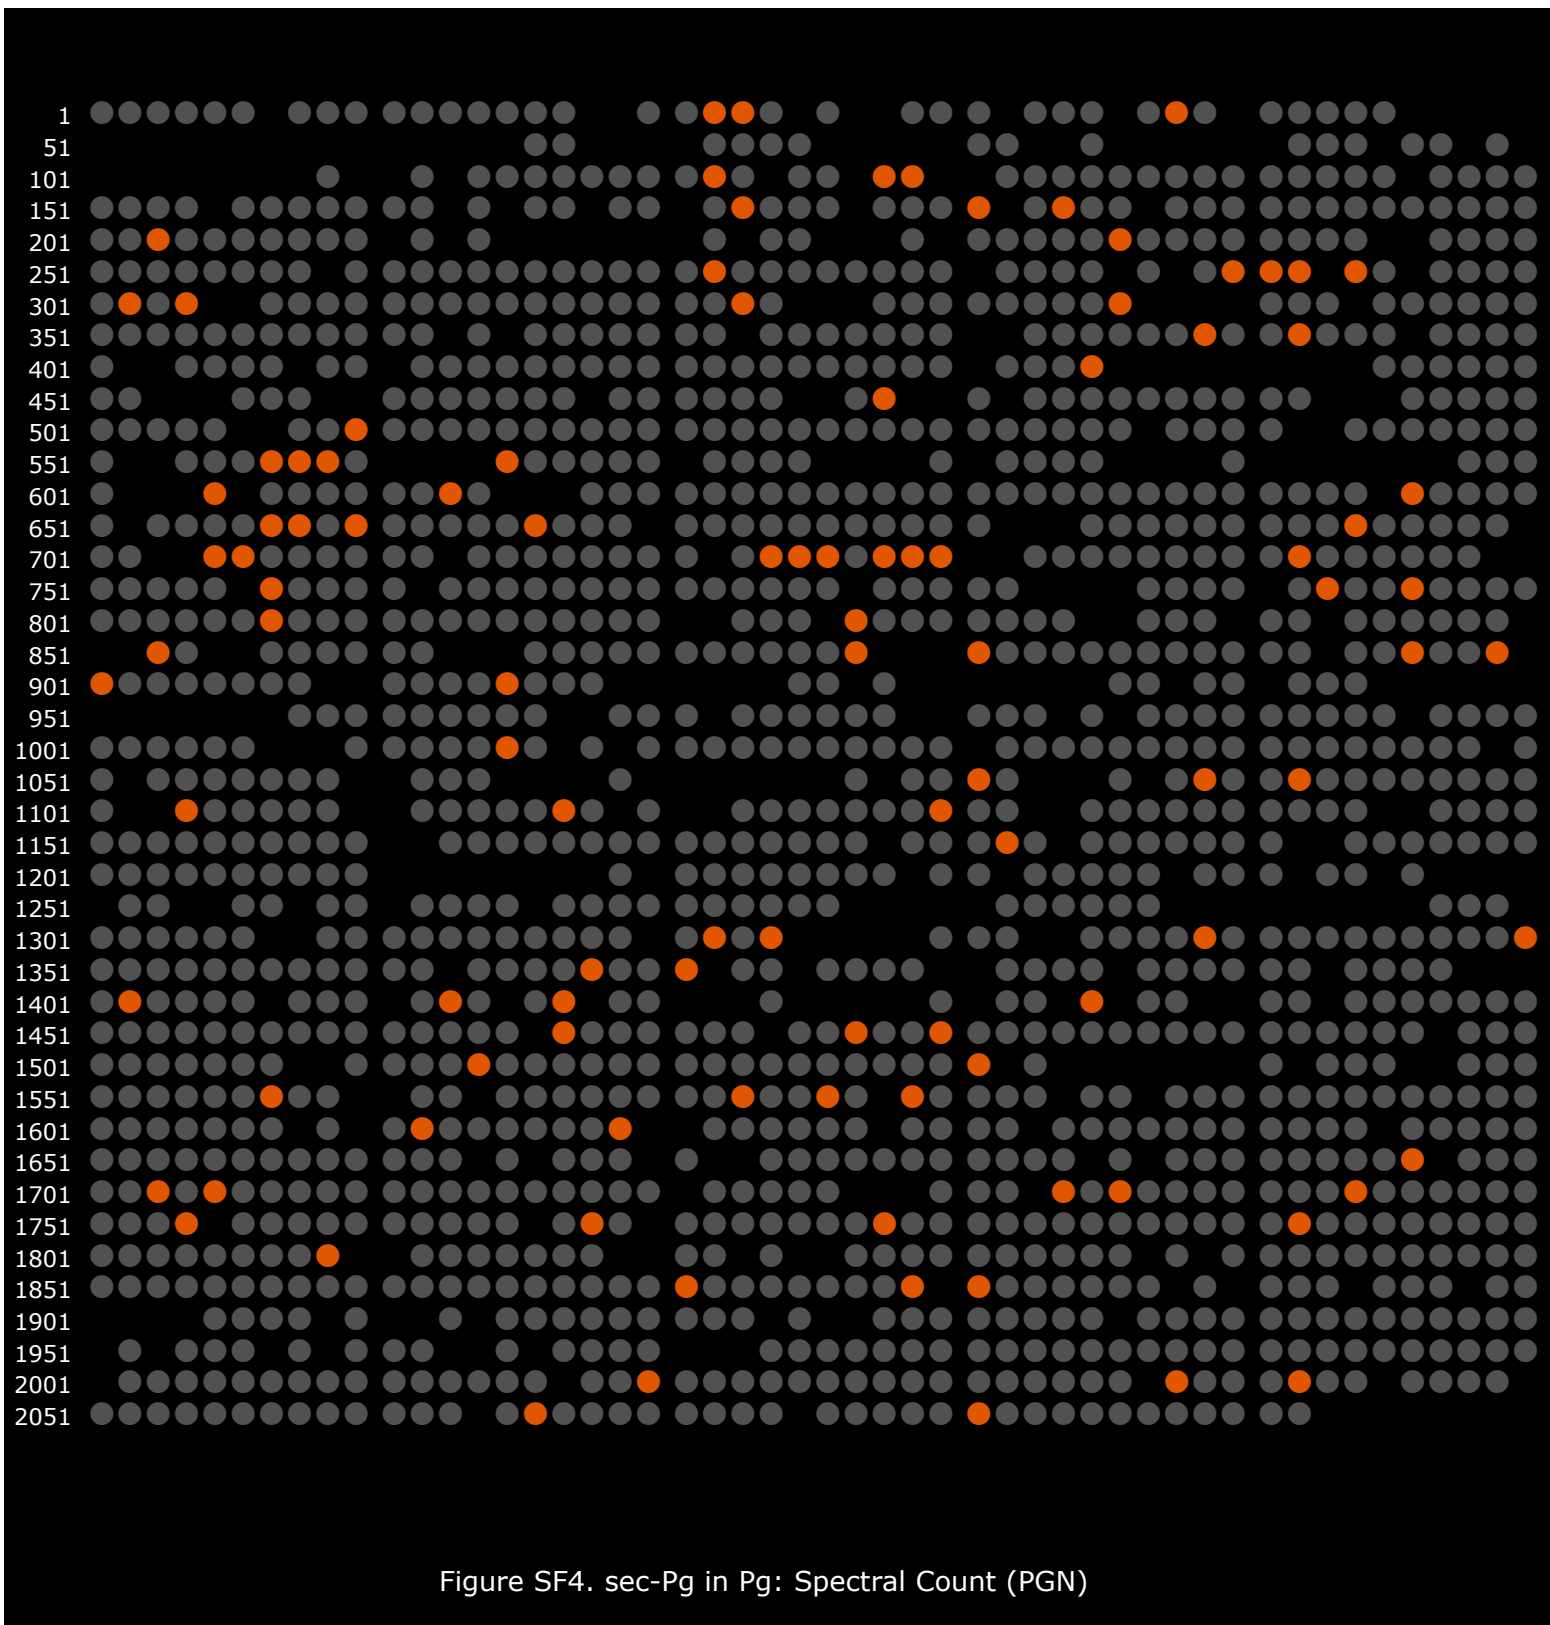

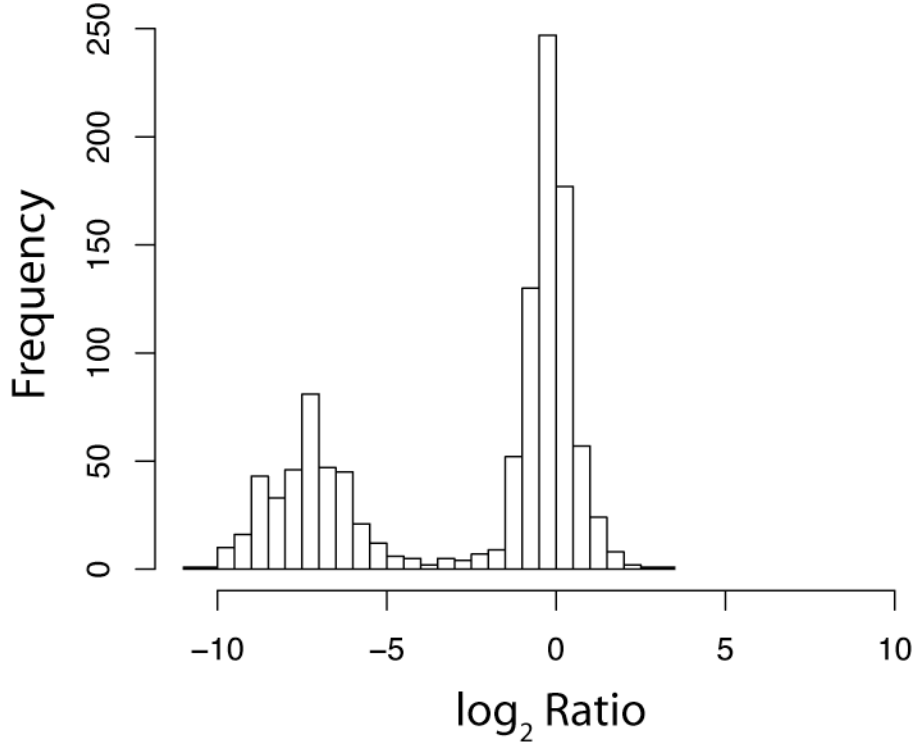

**Figure SF5.** PgSgFn / Pg by summed intensity prior to removal of data with inappropriate baselines.

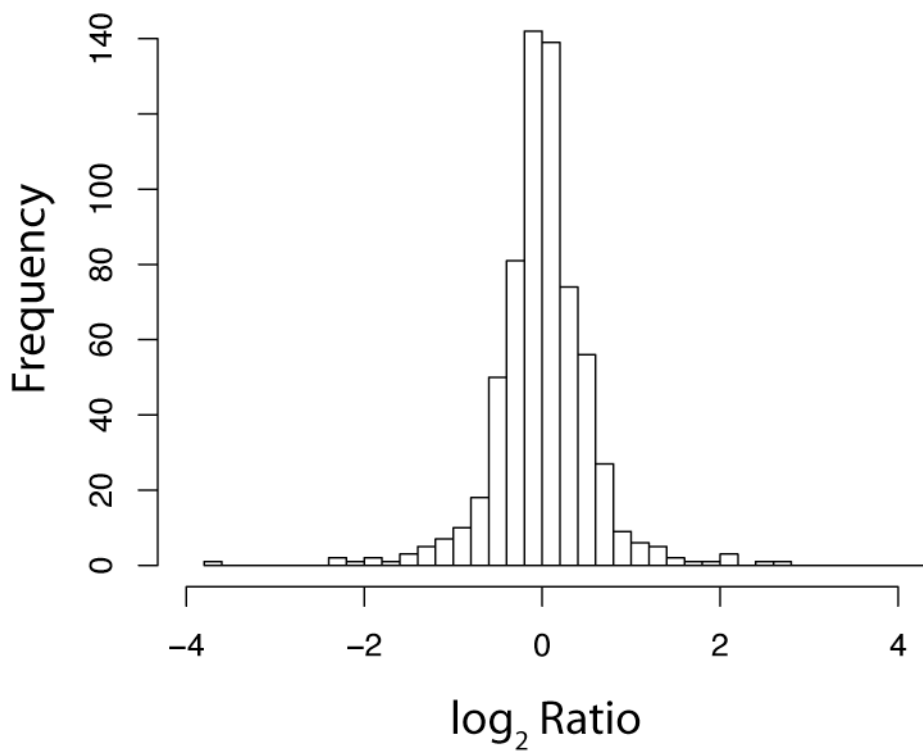

**Figure SF6.** PgSgFn / Pg by summed intensity after removal of data with inappropriate baselines.
